# Supplementary material for: A Photoactivated Ru (II) Polypyridine Complex Induced Oncotic Necrosis of A549 Cells by Activating Oxidative Phosphorylation and Inhibiting DNA Synthesis as Revealed by Quantitative Proteomics
Source: MDPI journal article supplement (doi:10.3390/ijms24097756), 2023-04-24
Supplement: s1 [file s1]

## **Supplementary Materials**

Figure S1 – S12

Table S1 – S5

(a)

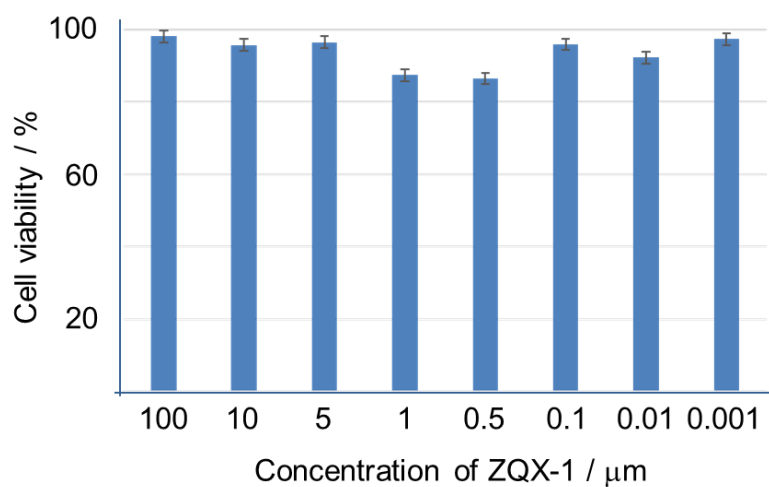

(b)

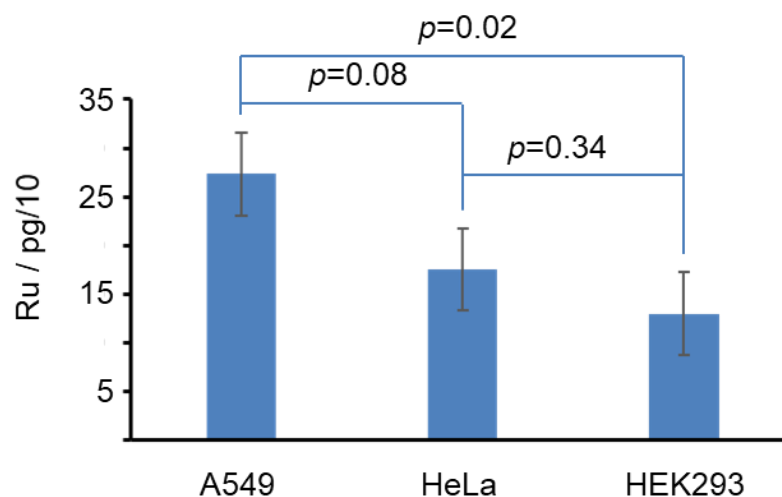

**Figure S1.** (a) The cell viability of HEK293 incubated with various concentrations of ZQX-1 in the dark for 4 h, followed by irradiation at 420 nm for 20 min and further incubation in the dark for 0.5 h. The cell viability (%) of HEK293T cells are present as mean  $\pm$  SD,  $n=6$ . (b) Ru concentrations determined by ICP-MS in A549, HeLa and HEK293T cells exposed to ZQX-1 (5  $\mu\text{M}$ ) for 4 h in the dark. All results are present as mean  $\pm$  SD,  $n=3$ .

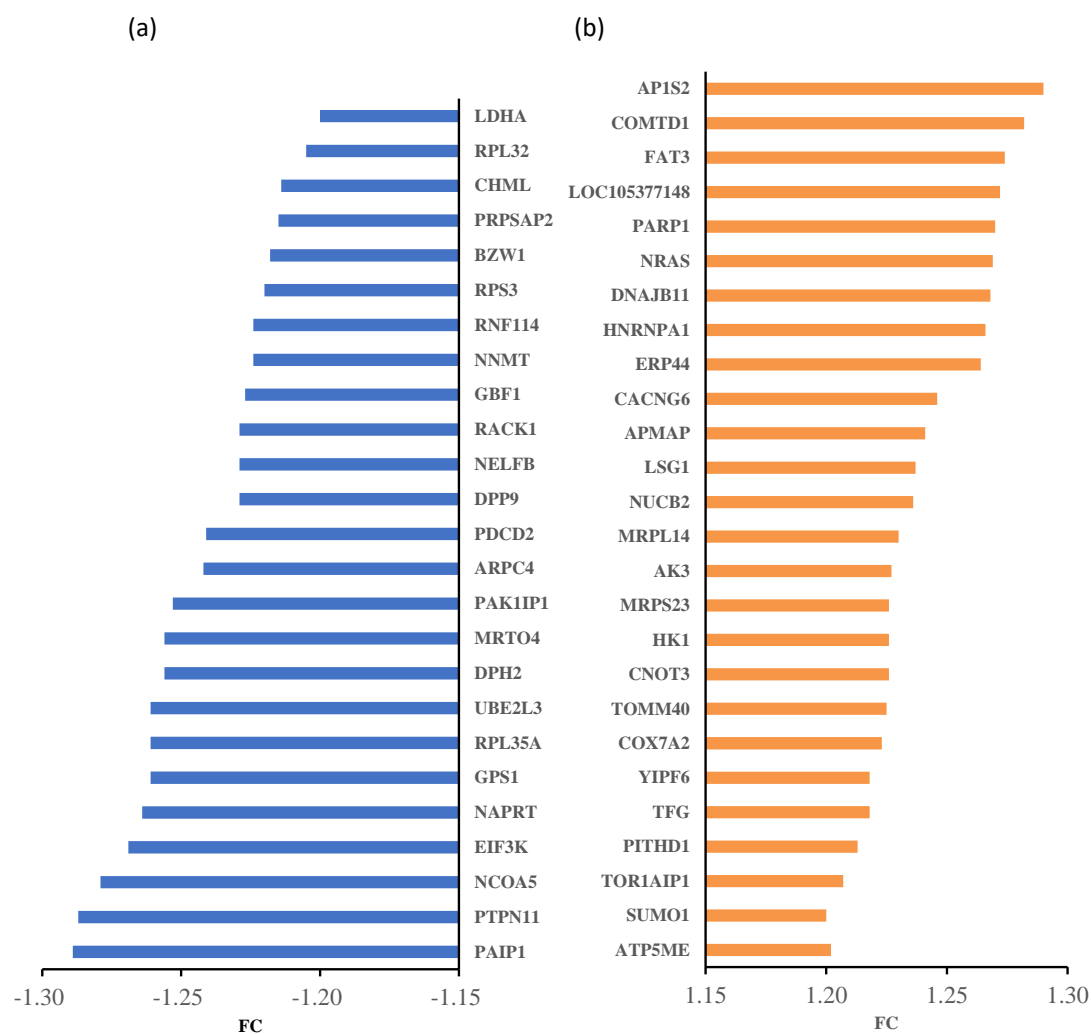

**Figure S2.** Differentially expressed proteins (DEPs) identified in A549 cells in LZ group with a fold changes (FC)  $\leq -1.2$  and  $\geq -1.3$  (a) or of  $\geq 1.2$  and  $\leq 1.3$  (b), compared to those in A549 cells in LB group.

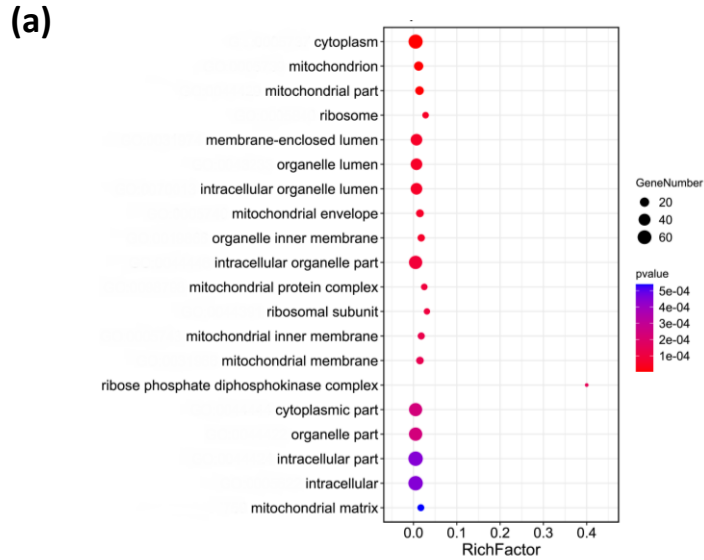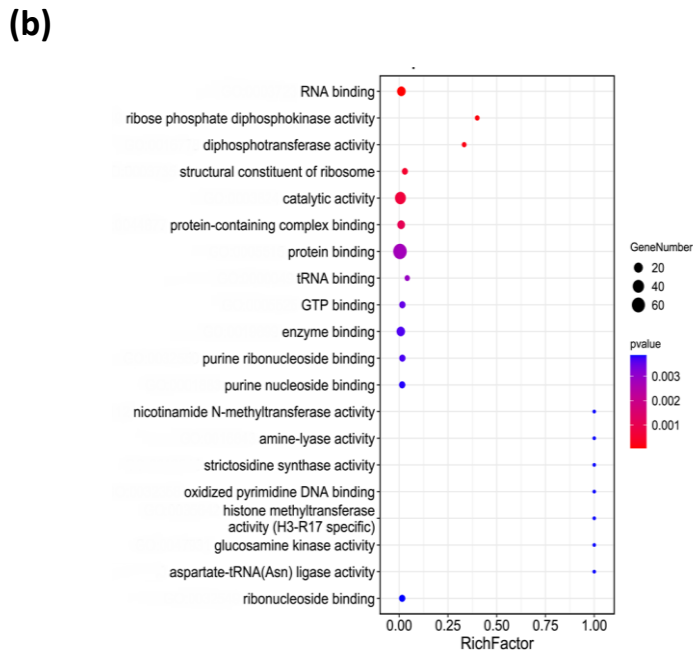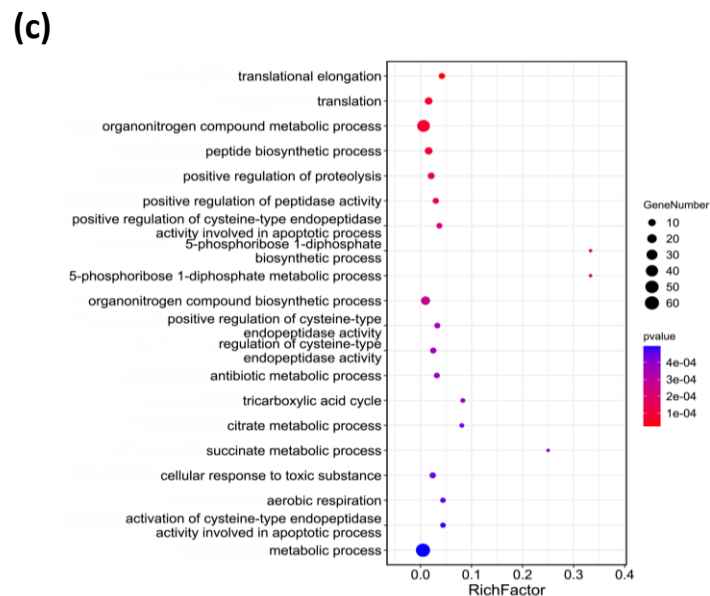

**Figure S3.** Bioinformatics analysis of the differentially expressed proteins (DEPs) with  $|FC| \geq 1.2$  identified in A549 cells exposed to 0.5  $\mu\text{M}$  of ZQX-1 under irradiation at 420 nm. Top 20 GO annotated (a) cellular component, (b) molecular functions and (c) biological process of the DEPs.

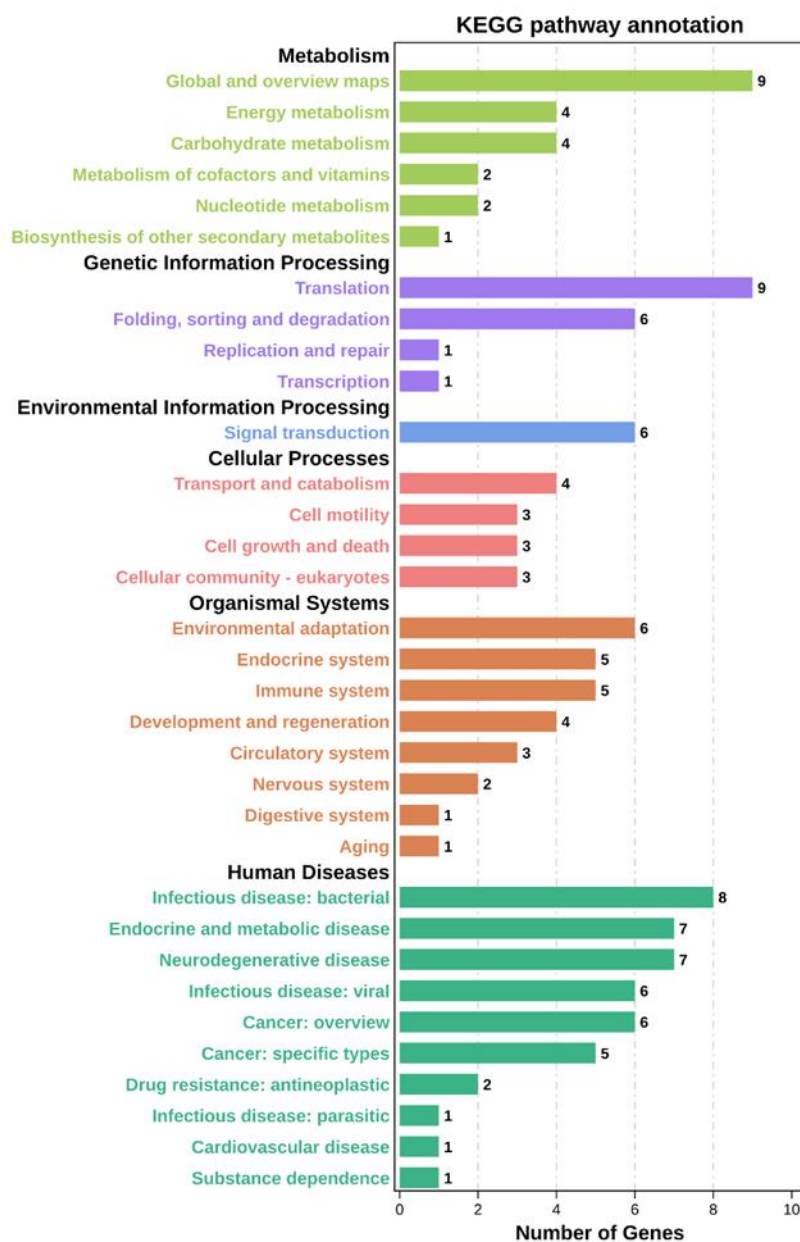

**Figure S4.** The KEGG pathway annotation of the differentially expressed proteins with  $|FC| \geq 1.2$  identified in A549 cells treated with 0.5  $\mu\text{M}$  of ZQX-1 under irradiation at 420 nm.

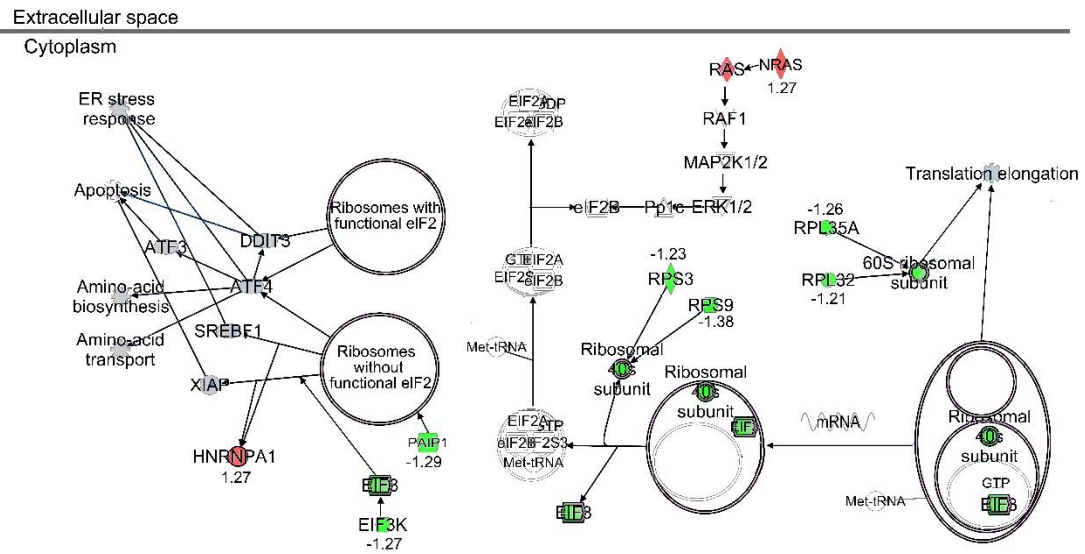

**Figure S5.** Schematic diagram generated by IPA of EIF2 signaling pathway with which the DEPs with  $|FC| \geq 1.2$ , identified in A549 cells exposed to 0.5  $\mu\text{M}$  of ZQX-1 under irradiation at 420 nm, are associated. The red color represents the protein (or complex) upregulated, green downregulated.

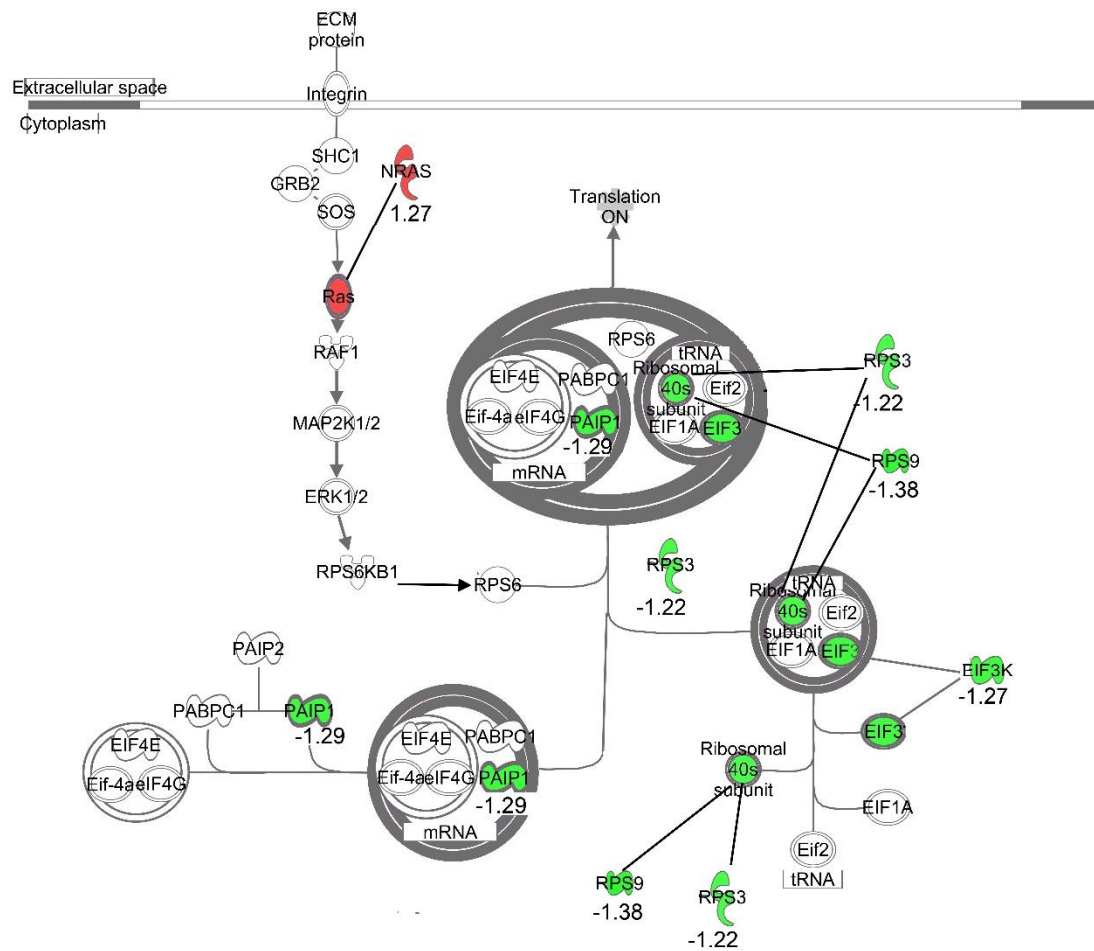

**Figure S6.** Schematic diagram generated by IPA of eIF4 and p70S6K signaling pathway with which the DEPs with  $|FC| \geq 1.2$ , identified in A549 cells exposed to 0.5  $\mu\text{M}$  of ZQX-1 under irradiation at 420 nm, are associated. The red color represents the protein (or complex) upregulated, green downregulated.

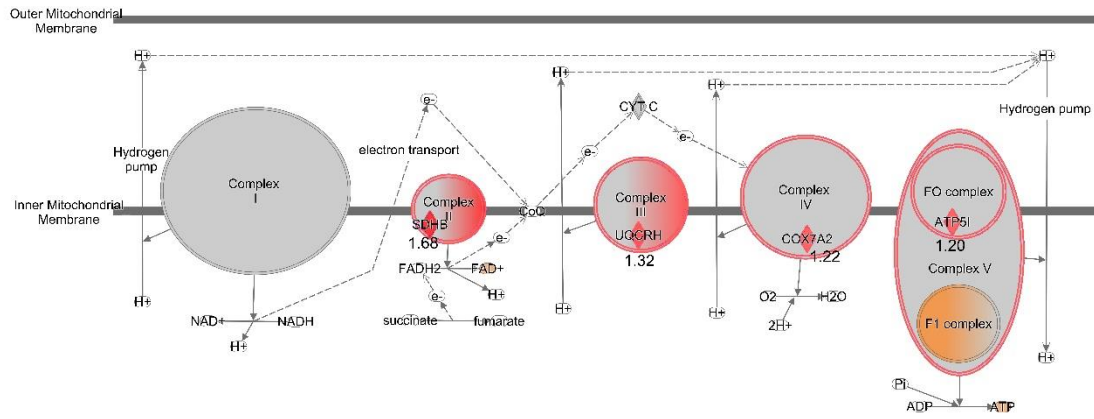

**Figure S7.** Schematic diagram generated by IPA of oxidative phosphorylation signaling pathway with which the DEPs with  $|FC| \geq 1.2$ , identified in A549 cells exposed to 0.5  $\mu\text{M}$  of ZQX-1 under irradiation at 420 nm, are associated. The red color represents the protein (or complex) upregulated, the orange represents the complex or compound predictively upregulated



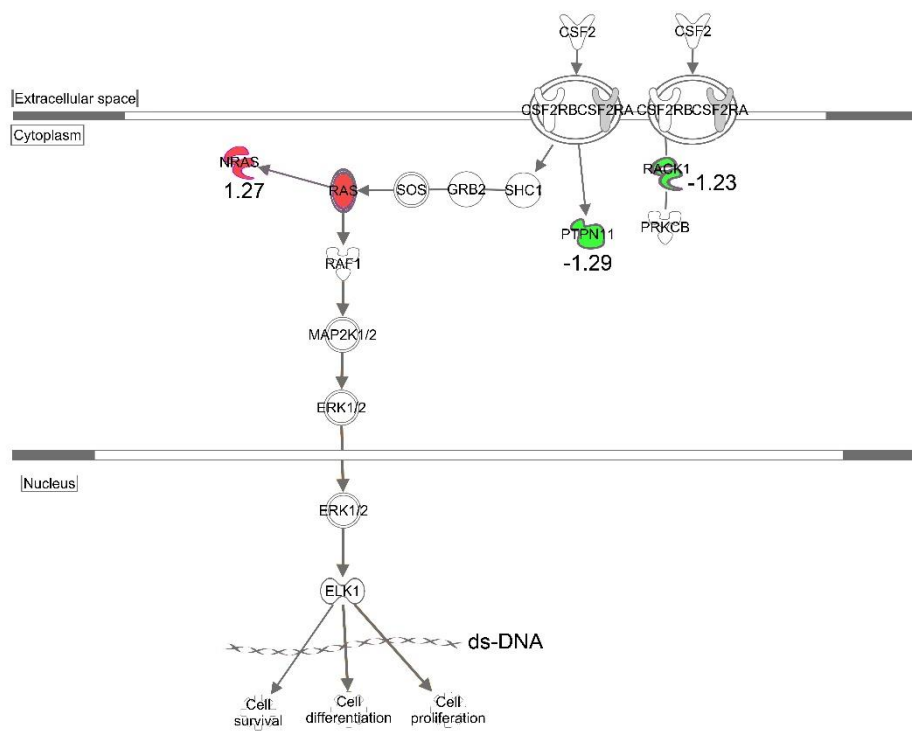

**Figure S8.** Schematic diagram generated by IPA of granulocyte-macrophage colony-stimulating factor (GM-CSF) signaling pathway with which the DEPs with  $|FC| \geq 1.2$  identified in A549 cells exposed to 0.5  $\mu$ M of ZQX-1 under irradiation at 420 nm. The red represents the protein (or complex) upregulated, green downregulated.

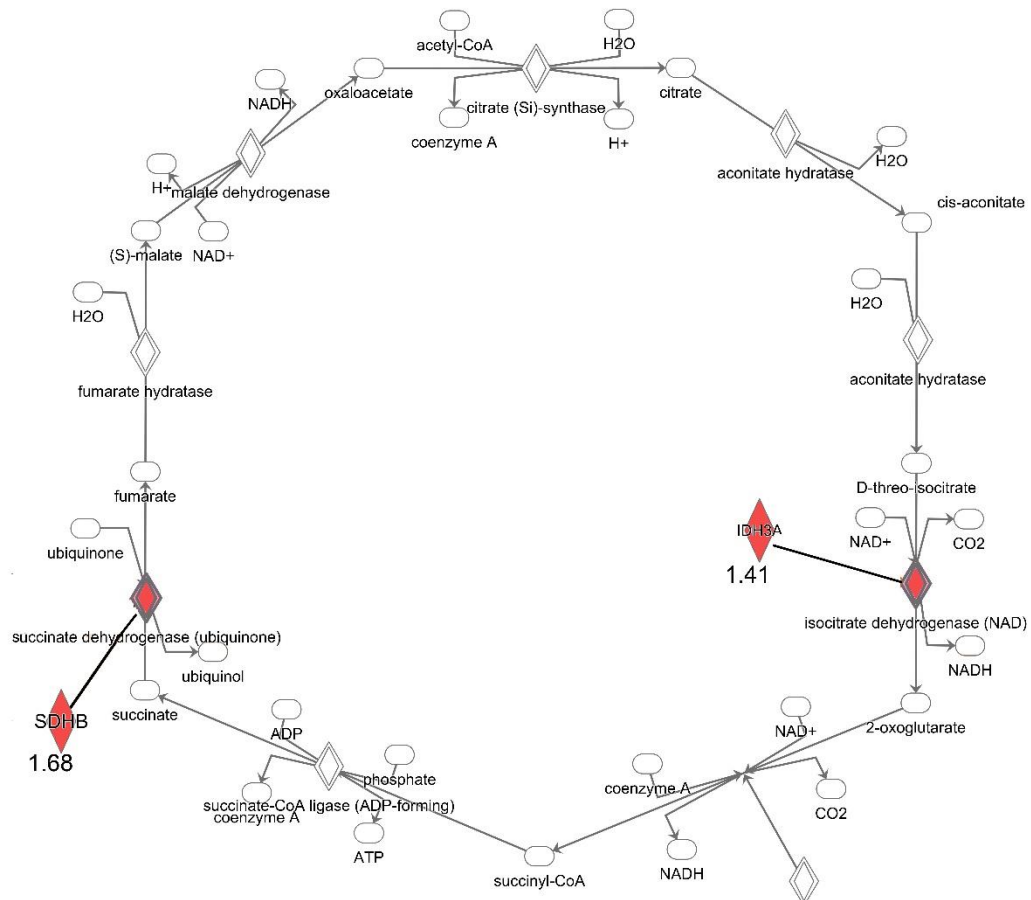

**Figure S9.** Schematic diagram generated by IPA of TCA cycle II signaling pathway with which the DEPs with  $|FC| \geq 1.2$ , identified in A549 cells exposed to 0.5  $\mu\text{M}$  of ZQX-1 under irradiation at 420 nm, are associated. The red color represents the protein (or complex) upregulated.

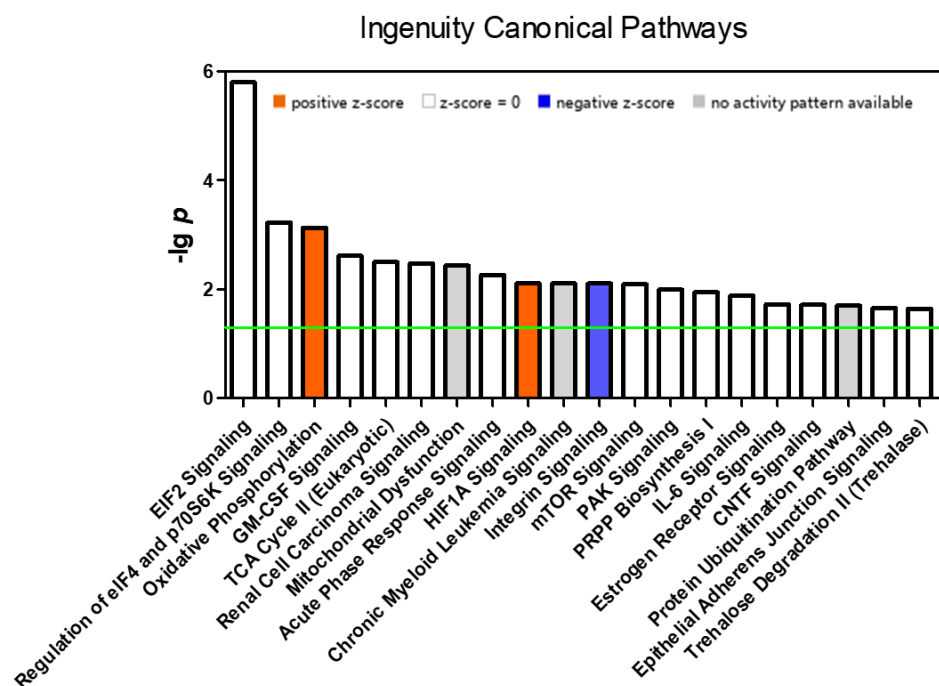

**Figure S10.** The Top 20 canonical pathways with which the DEPs with  $|FC| \geq 1.2$ , identified in A549 cells exposed to 0.5  $\mu\text{M}$  of ZQX-1 under irradiation at 420 nm, are associated. Green line indicates  $p \leq 0.05$ ; Orange represents activation of the pathway, blue inhibition of the pathway.

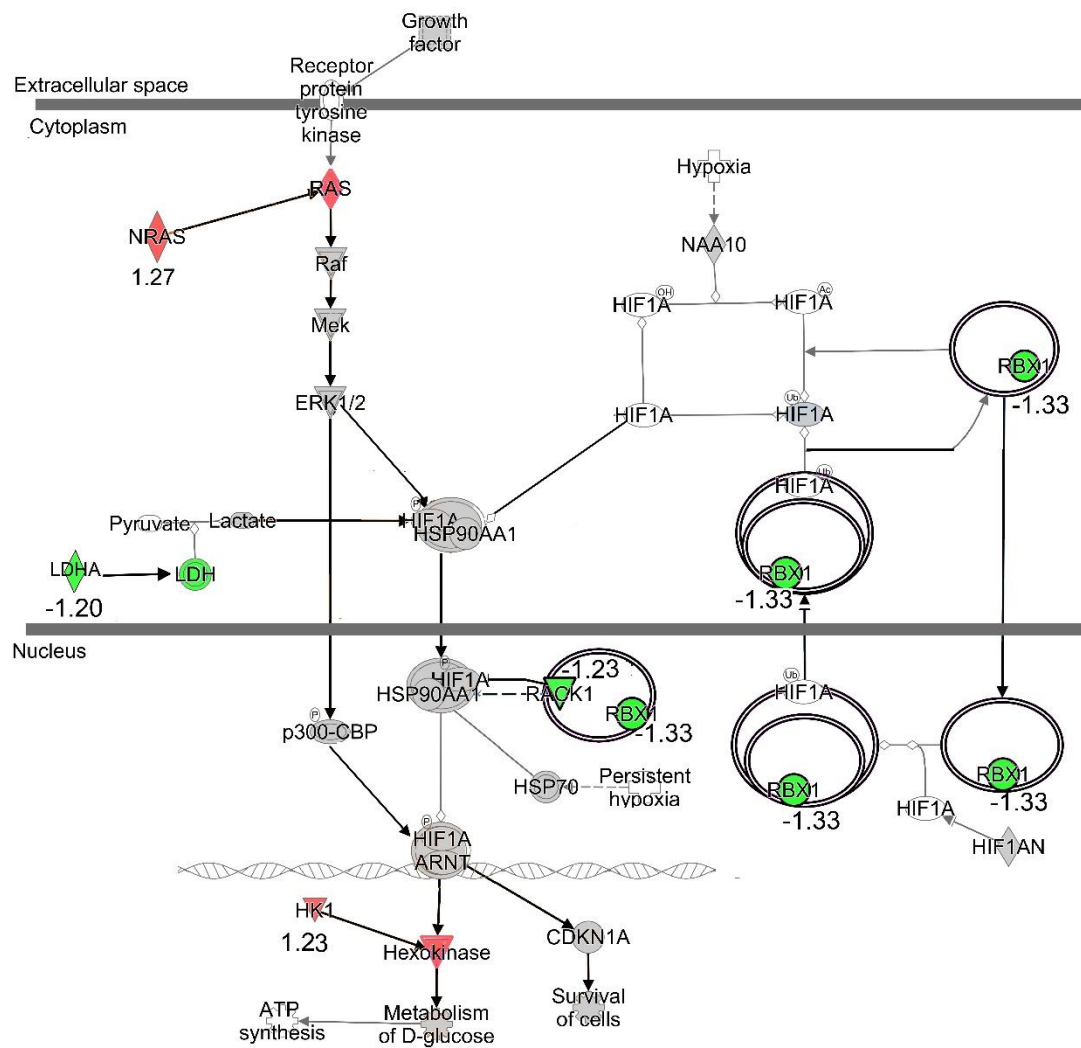

**Figure S11.** Schematic diagram generated by IPA of HIF1 $\alpha$  signaling pathway with which the DEPs with  $|FC| \geq 1.2$ , identified in A549 cells exposed to 0.5  $\mu$ M of ZQX-1 under irradiation at 420 nm, are associated. The red color represents the protein (or complex) upregulated, green downregulated.

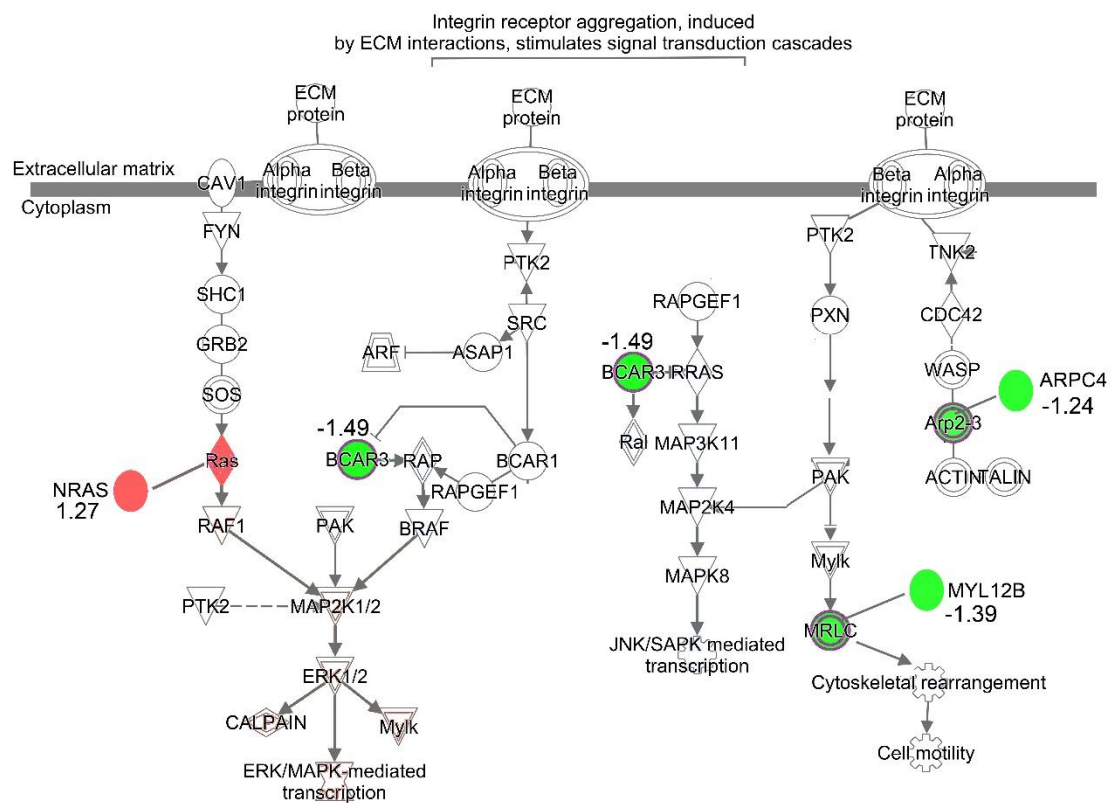

**Figure S12.** Schematic diagram generated by IPA of integrin signaling with which the DEPs with  $|FC| \geq 1.2$ , identified in A549 cells exposed to 0.5  $\mu$ M of ZQX-1 under irradiation at 420 nm, are associated. The red color represents the protein (or complex) upregulated, green downregulated.

**Table S1.** MS/MS raw data for protein identification and quantification in A549 cells.

[illegible]



[illegible]



|       |        |            |          |             |       |       |    |   |   |   |      |       |       |      |   |                         |                          |                    |                    |            |              |                      |             |      |      |      |      |      |      |      |      |      |      |   |
|-------|--------|------------|----------|-------------|-------|-------|----|---|---|---|------|-------|-------|------|---|-------------------------|--------------------------|--------------------|--------------------|------------|--------------|----------------------|-------------|------|------|------|------|------|------|------|------|------|------|---|
| FALSE | High   | Master Prc | P17480-1 | Nuclear l   | 0.002 | 3.606 | 1  | 1 | 1 | 1 | 764  | 89.4  | 5.81  | 1.8  | 1 | metabolic nucleus       | DNA bindi                | PI00505, F 7343    | ENSG0000 UBTf      | 17         |              | Ectoderm i RNA Polyr | 12          |      | High | High | High | High | High | High | 1    |      |      |   |
| FALSE | High   | Master Prc | Q17480-1 | Cysteine/l  | 0.004 | 2.76  | 1  | 1 | 1 | 1 | 501  | 55.4  | 9.19  | 0    | 1 | cell differe            | cell surface protein bir | PD0324, F 73657    | ENSG0000 SLCTA11   | 5          |              | NR2F path            | Basigin int | 9    |      | High | High | High | High | High | High | 1    |      |   |
| FALSE | Low    | Master Prc | P42702-1 | Leukemia i  | 0.051 | 1.886 | 1  | 1 | 1 | 1 | 1097 | 123.7 | 5.72  | 1.72 | 1 | regulation extracellul  | protein bir              | PI00041, 3977      | ENSG0000 LIFR      | 5          | Jak-STAT si  | Physiologi           | IL-6-type c | 17   |      | High | High | High | High | High | High | 1    |      |   |
| FALSE | High   | Master Prc | Q15103   | rho guanin  | 0.002 | 3.526 | 1  | 1 | 1 | 1 | 1369 | 151.5 | 5.68  | 2.84 | 1 | cell organi cytosol     | protein bir              | PI00621, 9639      | ENSG0000 ARHGFE10  | 8; CHR_ HS | G alpha i1:  | 11                   |             | High | High | High | High | High | High | 1    |      |      |      |   |
| FALSE | Low    | Master Prc | P42763-1 | Unconvent   | 0.05  | 1.196 | 2  | 1 | 1 | 1 | 135  | 59.8  | 5.05  | 0    | 1 | metabolic cytoplasm;    | enzyme re                | PI02996, F 8725    | ENSG0000 UR1I      | 19         |              |                      |             | 0    |      | High | High | High | High | High | High | 1    |      |   |
| FALSE | High   | Master Prc | Q96020   | PRKC appo   | 0     | 7.939 | 4  | 1 | 1 | 1 | 340  | 36.5  | 5.41  | 3.04 | 1 | cell death; cytoplasm;  | protein bir              | PI01544, F 5074    | ENSG0000 PAWR      | 12         |              |                      |             | 0    |      | High | High | High | High | High | High | 1    |      |   |
| FALSE | High   | Master Prc | QGZM8    | Nuclear dr  | 0.006 | 2.393 | 11 | 2 | 3 | 2 | 345  | 38.4  | 5.24  | 0    | 2 | cell differe chromosom  | catalytic a-             | PI04880, F 81565   | ENSG0000 NDEL1     | 17         |              | Amplificati          |             | 16   |      | High | High | High | High | High | High | 1    |      |   |
| FALSE | Medium | Master Prc | Q96E15   | Transcripti | 0.026 | 1.474 | 4  | 1 | 1 | 1 | 215  | 24.6  | 5.2   | 0    | 1 | metabolic nucleus       | protein bir              | PD4538, 79921      | ENSG0000 TCCLA4    | X          |              |                      |             | 0    |      | High | High | High | High | High | High | 1    |      |   |
| FALSE | High   | Master Prc | QB8Y6    | Exocyt co   | 0.003 | 3.468 | 2  | 2 | 2 | 2 | 725  | 81.7  | 5.49  | 0    | 2 | cell organi cytoplasm;  | protein bir              | PI00169, F 149371  | ENSG0000 EXOC8     | 1          | RALA down    | Translocat           | 11          |      | High | 1    |   |
| FALSE | Medium | Master Prc | Q13287   | N-myc-inte  | 0.031 | 1.421 | 3  | 1 | 1 | 1 | 307  | 35    | 5.34  | 0    | 1 | defense res cytoplasm;  | protein bir              | PI07292, F 9111    | ENSG0000 NM1       | 2          | IL-2 Signali |                      | 0           |      | High | 1    |   |
| FALSE | Medium | Master Prc | Q95073-1 | Fibrinogen  | 0.015 | 1.736 | 5  | 1 | 1 | 1 | 299  | 34.7  | 7.12  | 0    | 1 | metabolic nucleus       | catalytic a-             | PI13873, 100861411 | ENSG0000 FSBP; RAD | 8          |              |                      |             | 0    |      | High | High | High | High | High | High | 1    |      |   |
| FALSE | High   | Master Prc | QB8T6M   | E3 ubiquiti | 0.005 | 2.563 | 3  | 2 | 2 | 2 | 617  | 67.6  | 6.95  | 1.74 | 2 | metabolic endoplasm;    | catalytic a-             | PI00097, F 84447   | ENSG0000 SYVN1     | 11         | Protein prc  | Hlt mutant           | 18          |      | High | 1    |   |
| FALSE | High   | Master Prc | Q01658   | Protein Dr  | 0     | 6.244 | 9  | 2 | 2 | 3 | 176  | 19.4  | 4.75  | 6.17 | 2 | cell organi nucleus     | DNA bindi                | PI00808, 1810      | ENSG0000 DR1       | 1          | HAT3 acty    | 3                    |             |      | High | 1    |   |
| FALSE | High   | Master Prc | P07305   | Histone H1  | 0.009 | 2.105 | 7  | 1 | 1 | 1 | 194  | 20.9  | 10.84 | 2.65 | 1 | cell organi chromosom   | DNA bindi                | PI00538, 3005      | ENSG0000 H1F0      | 22         | Formation    | 10                   |             |      | High | 1    |   |
| FALSE | High   | Master Prc | QP64E1   | Protein CA  | 0     | 6.686 | 6  | 2 | 2 | 2 | 433  | 48.8  | 5.82  | 2.74 | 2 | Golgi;mern              |                          | PI04156, 113201    | CASC4              | 15         |              |                      |             | 0    |      | High | 1 |
| FALSE | High   | Master Prc | Q96K21   | Abscission, | 0     | 6.312 | 7  | 3 | 3 | 2 | 471  | 51.5  | 5.73  | 1.85 | 3 | cell divisio cytoplasm; | metal ion                | PI01363, 84936     | ENSG0000 ZFYVE19   | 15         |              |                      |             | 0    |      | High | 1 |
| FALSE | High   | Master Prc | P33121   |             |       |       |    |   |   |   |      |       |       |      |   |                         |                          |                    |                    |            |              |                      |             |      |      |      |      |      |      |      |      |      |      |   |

|       |        |            |          |              |       |         |    |    |     |   |      |       |        |      |    |              |              |             |            |            |           |           |       |             |             |             |             |      |      |      |      |      |      |      |   |
|-------|--------|------------|----------|--------------|-------|---------|----|----|-----|---|------|-------|--------|------|----|--------------|--------------|-------------|------------|------------|-----------|-----------|-------|-------------|-------------|-------------|-------------|------|------|------|------|------|------|------|---|
| FALSE | High   | Master Prc | Q195394  | phosphoc     | 0     | 7.904   | 8  | 4  | 4   | 4 | 542  | 59.8  | 6.25   | 1.82 | 4  | metabolic    | cytosol      | catalytic   | at         | P100408, F | 5238      | ENSG00000 | PGM3  | 6           | Amino sug   | Glucuronid  | Synthesis c | 9    | High | High | High | High | High | High | 1 |
| FALSE | High   | Master Prc | P32970   | CD70 anti    | 0.003 | 2.84    | 6  | 1  | 1   | 1 | 193  | 21.1  | 8.53   | 1.72 | 1  | cell comm    | membrane     | protein bir | PI00229    | 970        | ENSG00000 | CD70      | 19    |             | Cytokine-c  | TNFs bind   | 5           | High | High | High | High | High | High | 1    |   |
| FALSE | High   | Master Prc | QBWY22   | BR13-bind    | 0     | 5.726   | 10 | 2  | 2   | 2 | 251  | 27.8  | 9.44   | 1.7  | 2  | membrane     |              |             | P114965    | 140707     | ENSG00000 | BR13BP    | 12    |             |             |             |             | High | High | High | High | High | High | 1    |   |
| FALSE | High   | Master Prc | QK4MQC2  | Anoctamin    | 0.002 | 3.922   | 3  | 2  | 2   | 2 | 910  | 106.1 | 7.77   | 2.53 | 2  | cell organ   | cell surface | protein bir | PI04547    | 196527     | ENSG00000 | ANO6      | 12    |             |             | Neurothril  | 6           | High | High | High | High | High | High | 1    |   |
| FALSE | High   | Master Prc | QBQ800   | ras-related  | 0.002 | 3.717   | 3  | 1  | 1   | 1 | 399  | 44.2  | 5.1    | 2.55 | 1  | cell comm    | cytoplasm;   | catalytic   | at         | PI00025, F | 64121     | ENSG00000 | RAGC  | 1           | mTOR sign   | Target Of f | Energy deg  | 17   | High | High | High | High | High | High | 1 |
| FALSE | High   | Master Prc | PL1978-2 | Isomform 2   | 0     | 242.785 | 65 | 28 | 139 | 1 | 464  | 51.3  | 363.05 |      | 28 | metabolic    | cytoplasm;   | DNA bindi   | PI00013, F | 31190      | ENSG00000 | HNRNPNC   | 9     |             | mRNA Pro    |             | 12          | High | High | High | High | High | High | 1    |   |
| FALSE | Medium | Master Prc | P118850  | Cyclic AMP   | 0.018 | 1.661   | 2  | 1  | 1   | 1 | 670  | 74.5  | 8.22   |      | 1  | metabolic    | cytosol;eni  | DNA bindi   | PI00170, F | 22926      | ENSG00000 | ATF6      | 6     | Protein prc | Sterol Res  | ATF4 activ  | 1           | High | High | High | High | High | High | 1    |   |
| FALSE | High   | Master Prc | Q15239   | NADH deht    | 0.001 | 4.469   | 19 | 1  | 1   | 1 | 70   | 8.1   | 8.84   | 3.73 | 1  | cell organ   | cytosol;me   | catalytic   | at         | 4694       | ENSG00000 | NDUFA1    | X     | Metabolic   | Electron Tr | Complex i   | 12          | High | High | High | High | High | High | 1    |   |
| FALSE | Medium | Master Prc | QBW181   | Inositol 1,4 | 0.032 | 1.397   | 1  | 1  | 1   | 1 | 547  | 6.2   | 5.88   | 0    | 1  | membrane     |              |             | PI03281    | 85450      | ENSG00000 | ITPR1P    | 10    |             |             |             |             | High | High | High | High | High | High | 1    |   |
| FALSE | High   | Master Prc | QBK64X   | HEAT repe    | 0.008 | 2.199   | 1  | 1  | 1   | 1 | 2040 | 221.9 | 6.58   | 2.52 | 1  |              |              |             |            | 25938      | ENSG00000 | HEATRS1A  | 14    |             |             |             |             | High | High | High | High | High | High | 1    |   |
| FALSE | High   | Master Prc | P48029-1 | Sodium-ai    | 0     | 4.836   | 2  | 1  | 1   | 1 | 635  | 70.5  | 6.42   | 1.97 | 1  | metabolic    | membrane     | transporte  | PI00209    | 6535       | ENSG00000 | SLC6A8    | X     |             |             | NR1F2 path  | Creatine m  | 5    | High | High | High | High | High | High | 1 |
| FALSE | Medium | Master Prc | P101008  | Antithrom    | 0.036 | 1.344   | 2  | 1  | 1   | 1 | 464  | 52.6  | 6.71   | 0    | 1  | coagulation  | extracellul  | enzyme re   | PI00079    | 462        | ENSG00000 | SERPINC1  | 1     | Compleme    | Compleme    | Post-trans  | 10          | High | High | High | High | High | High | 1    |   |
| FALSE | High   | Master Prc | Q14965   | Aurora kin   | 0     | 6.171   | 5  | 1  | 1   | 1 | 403  | 45.8  | 9.39   | 3.49 | 1  | cell divisio | cytoplasm;   | catalytic   | at         | PI00069, F | 6790      | ENSG00000 | AURKA | 20          | Oocyte me   | Gastric Car | FBX17 down  | 27   | High | High | High | High | High | High | 1 |
| FALSE | High   | Master Prc | Q75717   | WD repeat    | 0     | 12.296  | 5  | 4  | 5   | 4 | 1129 | 125.9 | 5.62   | 4.31 | 4  | cytoplasm;   | DNA bindi    | PI00400, F  | 11169      | ENSG00000  | WDHD1     | 14        |       | Mesoderm    |             | 1           | High        | High | High | High | High | High | 1    |      |   |
| FALSE | High   | Master Prc | Q13308-1 | Inactive ty  | 0     | 11.169  | 4  | 2  | 2   | 2 | 1070 | 118.7 | 7.09   | 8.8  | 2  | cell differe | membrane     | catalytic   | at         | PI00047, F | 5754      | ENSG00000 | PTK7  | 6           |             |             |             |      | High | High | High | High | High | High | 1 |
| FALSE | High   | Master Prc | QBWU90   | Zinc finger  | 0     | 9.691   | 9  | 4  | 4   | 4 | 426  | 48.6  | 5.31   | 1.68 | 4  | regulation   | cytoplasm;   | metal ion   | PI00642    | 55854      |           |           |       |             |             |             |             |      |      |      |      |      |      |      |   |

[illegible]

|       |        |                     |              |       |         |    |   |   |   |      |       |      |       |   |               |                       |             |    |        |          |            |         |    |            |             |     |      |      |      |      |      |      |      |      |   |
|-------|--------|---------------------|--------------|-------|---------|----|---|---|---|------|-------|------|-------|---|---------------|-----------------------|-------------|----|--------|----------|------------|---------|----|------------|-------------|-----|------|------|------|------|------|------|------|------|---|
| FALSE | Medium | Master Prc QSNY71-1 | elongation   | 0.024 | 1.503   | 3  | 1 | 1 | 1 | 299  | 35.3  | 9.42 | 1.87  | 1 | metabolic     | endoplasmic reticulum | catalytic   | at | P01151 | 60481    | ENSG000001 | ELOVL5  | 6  | Fatty acid | Synthesis   | c   | 11   | High | 1 |
| FALSE | High   | Master Prc Q92922   | SWI/SNF co   | 0     | 19.999  | 5  | 6 | 9 | 3 | 1105 | 122.8 | 5.76 | 11.12 | 6 | cell organi   | chromosome            | DNA bindi   | ng | P04433 | 6599     | ENSG000001 | SMARCC1 | 3  |            | RUNX1       | int | 8    | High | 1 |
| FALSE | High   | Master Prc Q96C9    | GRIP and c   | 0.001 | 4.264   | 1  | 1 | 1 | 1 | 775  | 87.8  | 5.45 | 0     | 1 | metabolic     | cytoplasm             | protein bin |    | P01465 | F 79571  | ENSG000001 | GC1     | 7  |            | Retrigade   | a   | 8    | High | 1 |
| FALSE | High   | Master Prc Q9NV23   | Adaptin ec   | 0.003 | 3.133   | 4  | 1 | 1 | 1 | 263  | 28.3  | 8.38 | 2.21  | 1 | transport     | membrane              |             |    | P07933 | 55707    | ENSG000001 | NECAP2  | 1  |            | Cargo reco  | d   | 4    | High | 1 |
| FALSE | High   | Master Prc P52732   | Kinesin-III  | 0.002 | 9.852   | 3  | 3 | 3 | 3 | 1056 | 119.1 | 5.64 | 6.08  | 3 | cell division | cytoplasm             | catalytic   | at | P00225 | F 3832   | ENSG000001 | KIF11   | 10 |            | COPII-depe  | e   | 11   | High | 1 |
| FALSE | Medium | Master Prc Q9UKU7   | Isobutyryl-  | 0.016 | 1.714   | 2  | 1 | 1 | 1 | 415  | 45    | 7.85 | 1.79  | 1 | metabolic     | mitochondr            | catalytic   | at | P00441 | F 27034  | ENSG000001 | ACAD8   | 11 | Metabolic  | Branched-c  | 5   | High | 1 |
| FALSE | High   | Master Prc Q95989   | Diphospho    | 0     | 5.148   | 5  | 1 | 1 | 1 | 172  | 19.5  | 3.64 | 0     | 1 | cell commu    | cytoplasm             | catalytic   | at | P00293 | 11165    | ENSG000001 | NUDT3   | 6  |            | Synthesis c | 3   | High | 1 |
| FALSE | High   | Master Prc Q13033   | Striatin-3   | 0     | 6.181   | 2  | 1 | 1 | 1 | 797  | 87.2  | 5.36 | 2.55  | 1 | regulation    | cytoplasm             | protein bin |    | P00400 | F 29966  | ENSG000001 | STRN3   | 14 |            |             | 0   | High | 1 |
| FALSE | High   | Master Prc Q9P2W9   | Syntaxin-1   | 0.003 | 2.976   | 6  | 1 | 1 | 1 | 335  | 38.7  | 4.29 | 2.3   | 1 | cell organi   | endoplasmic           | protein bin |    | P10496 | 53407    | ENSG000001 | STX18   | 4  | Phagosome  | COPII-depe  | 7   | High | 1 |
| FALSE | Medium | Master Prc Q2RRP1-1 | neuroblast   | 0.026 | 1.468   | 0  | 1 | 1 | 1 | 2371 | 268.4 | 5.96 | 0     | 1 | metabolic     | cytoplasm             | protein bin |    | P08314 | F 51594  | ENSG000001 | NBAS    | 2  |            | COPII-depe  | 5   | High | 1 |
| FALSE | High   | Master Prc Q8WXG6   | MAP kinase   | 0.003 | 3.11    | 1  | 1 | 1 | 1 | 1647 | 183.2 | 4.60 | 2.03  | 1 | cell death    | cytoplasm             | enzyme re   |    | P02141 | F 8567   | ENSG000001 | MADD    | 11 |            | Deregulat   | 2   | High | 1 |
| FALSE | High   | Master Prc Q8NHG8   | E3 ubiquiti  | 0.003 | 2.86    | 14 | 1 | 1 | 1 | 242  | 24.1  | 7.09 | 2.39  | 1 | metabolic     | cytoplasm             | catalytic   | at | P00097 | F 223082 | ENSG000001 | ZNF82   | 7  |            | Antigen pr  | 2   | High | 1 |
| FALSE | High   | Master Prc Q5VZK9   | F-actin-uni  | 0.006 | 2.519   | 1  | 2 | 2 | 2 | 1371 | 151.5 | 7.85 | 1.75  | 2 | cell organi   | cytoplasm             | protein bin |    | P08542 | 55604    | ENSG000001 | LRC16A  | 16 |            | Factors inv | 4   | High | 1 |
| FALSE | High   | Master Prc Q9NZJ6   | Ubiquitin    | 0.004 | 2.7     | 5  | 1 | 1 | 1 | 369  | 41    | 7.42 | 0     | 1 | metabolic     | membrane              | catalytic   | at | P01209 | F 51805  | ENSG000001 | CO3     | 6  | Metabolic  | Ubiquinol   | 6   | High | 1 |
| FALSE | Medium | Master Prc P17540   | Creatine kin | 0.037 | 1.324   | 3  | 1 | 1 | 1 | 419  | 47.5  | 8.19 | 0     | 1 | metabolic     | membrane              | catalytic   | at | P00217 | F 1160   | ENSG000001 | CKMT2   | 5  | Metabolic  | Creatine m  | 6   | High | 1 |
| FALSE | High   | Master Prc Q43324-1 | Eukaryotic   | 0.001 | 4.452</ |    |   |   |   |      |       |      |       |   |               |                       |             |    |        |          |            |         |    |            |             |     |      |      |      |      |      |      |      |      |   |

[illegible]

[illegible]

|       |        |                     |             |       |       |   |   |   |   |      |       |      |      |   |              |              |            |    |            |        |          |            |           |             |             |            |      |      |      |      |           |      |      |           |   |
|-------|--------|---------------------|-------------|-------|-------|---|---|---|---|------|-------|------|------|---|--------------|--------------|------------|----|------------|--------|----------|------------|-----------|-------------|-------------|------------|------|------|------|------|-----------|------|------|-----------|---|
| FALSE | High   | Master PrC Q85R1    | Polypeptid  | 0.009 | 2.114 | 1 | 1 | 1 | 1 | 603  | 68.9  | 8.59 | 2.49 | 1 | metabolic    | Golgi;mem    | catalytic  | ai | P00035, F  | 55568  | ENSG0000 | GALT10     | 5         | Metabolic   | O-linked gl | 6          | High | High | High | High | High      | High | High | 1         |   |
| FALSE | High   | Master PrC Q9275    | UBX doma    | 0     | 9.071 | 9 | 3 | 4 | 3 | 508  | 56.7  | 6.38 | 3.76 | 3 | metabolic    | cytosol;eni  | protein bi | ai | P00789     | 23190  | ENSG0000 | UBXNA      | 2         |             |             | 0          | High | High | High | High | High      | High | High | 1         |   |
| FALSE | High   | Master PrC Q9P282   | prostaglan  | 0.003 | 3.165 | 1 | 1 | 1 | 1 | 879  | 98.5  | 6.61 | 1.72 | 1 | cell organi  | cell surface | protein bi | ai | P007679    | 5738   | ENSG0000 | PTGFRN     | 1         |             |             | 0          | High | High | High | High | High      | High | High | 1         |   |
| FALSE | High   | Master PrC Q9UDT6-1 | CAP-Gly d   | 0     | 7.613 | 4 | 4 | 4 | 4 | 1046 | 115.8 | 6.73 | 6.33 | 4 | metabolic    | cytoplasm;   | catalytic  | ai | P01302, F  | 7461   | ENSG0000 | CLIP2      | 7         |             |             | 0          | High | High | High | High | High      | High | High | 1         |   |
| FALSE | High   | Master PrC Q9UNU4   | Transmem    | 0     | 7.933 | 8 | 2 | 2 | 2 | 274  | 31.1  | 6.99 | 4.38 | 2 | cell organi  | endosome     | protein bi | ai | P007092    | 54664  | ENSG0000 | TMEM106    | 7         |             |             | 0          | High | High | High | High | High      | High | High | 1         |   |
| FALSE | Medium | Master PrC Q9NW34   | Nucleosul   | 0.048 | 1.217 | 2 | 1 | 1 | 1 | 567  | 64.5  | 9.74 | 0    | 1 | developme    | nucleus      |            |    | P014780    | 25871  | ENSG0000 | Clorf17; N | 3         |             |             | 0          | High | High | High | High | High      | High | High | 1         |   |
| FALSE | High   | Master PrC Q9EY1-1  | DnaI hom    | 0.002 | 3.548 | 3 | 1 | 2 | 1 | 480  | 52.5  | 9.26 | 2.31 | 1 | cell death;  | cytoplasm;   | enzyme re  |    | P00226, F  | 9093   | ENSG0000 | DNAJ3      | 16; CHR_H | Viral carci | 1           | 1          | High | High | High | High | High      | High | High | 1         |   |
| FALSE | Medium | Master PrC P36402   | Transcript  | 0.048 | 1.218 | 2 | 1 | 1 | 1 | 384  | 41.6  | 6.81 | 1.88 | 1 | cell differe | nucleus      | DNA bindi  |    | P000505, F | 6932   | ENSG0000 | TCF7       | 5         | Wnt signal  | Arrhythmic  | RUNX3 reg  | 33   | High | High | High | High      | High | High | High      | 1 |
| FALSE | High   | Master PrC Q8N9E0   | Protein FA  | 0.009 | 2.122 | 3 | 1 | 1 | 1 | 248  | 28.9  | 10.1 | 1.76 | 1 |              |              | protein bi |    | 286499     |        | ENSG0000 | FAM133A    | X         |             |             | 0          | High | High | High | High | High      | High | High | 1         |   |
| FALSE | High   | Master PrC Q1ED39   | Lysine-rich | 0.002 | 3.943 | 4 | 1 | 1 | 1 | 458  | 51.6  | 9.86 | 3.19 | 1 |              | nucleus      | RNA bindi  |    | P015477    | 400506 | ENSG0000 | C16orf88;  | 16        |             |             | 0          | High | High | High | High | High      | High | High | 1         |   |
| FALSE | High   | Master PrC Q9J324   | rRNA-proc   | 0     | 5.471 | 6 | 1 | 2 | 1 | 198  | 23.4  | 9.7  | 2.48 | 1 | metabolic    | nucleus      | RNA bindi  |    | P004900    | 51077  | ENSG0000 | FCF1       | 14        | Ribosome    |             | Major patt | 6    | High | High | High | High      | High | High | High      | 1 |
| FALSE | Low    | Master PrC P98196   | Probable p  | 0.075 | 1.015 | 1 | 1 | 1 | 1 | 1134 | 129.7 | 6.6  | 0    | 1 | cell organi  | endoplasm    | catalytic  | ai | P00122, F  | 23250  | ENSG0000 | ATP11A     | 13        |             | Lung fibro  | Neutrophil | 7    | High | High | High | Not Found | High | High | 1         |   |
| FALSE | High   | Master PrC Q9B208   | Protein N8  | 0     | 6.206 | 3 | 2 | 2 | 2 | 928  | 103.1 | 4.78 | 3.66 | 2 | regulation   | cytoplasm;   | protein bi |    | 116496     |        | ENSG0000 | FAM129A    | 1         |             |             | 0          | High | High | High | High | High      | High | High | 1         |   |
| FALSE | High   | Master PrC P82664   | 28S riboso  | 0.003 | 2.908 | 6 | 1 | 1 | 1 | 201  | 23    | 8    | 0    | 1 | cell organi  | membrane     |            |    | P00338     | 55173  | ENSG0000 | MRPS10     | 6         | Ribosome    |             | Mitochondr | 7    | High | High | High | High      | High | High | High      | 1 |
| FALSE | Medium | Master PrC Q8BW13-1 | Isomorf 6   | 0.018 | 1.662 | 1 | 1 | 1 | 1 | 1551 | 170.3 | 6.61 | 0    | 1 | defense re   | cytoplasm;   | DNA bindi  |    | P005729, F | 84166  | ENSG0000 | NLRCS      | 16        |             |             | 0          | High | High | High | High | High      | High | High | 1 [R1533] |   |
| FALSE | Medium | Master PrC Q08378   | Golgin sub  | 0.028 | 1.449 | 1 | 1 | 1 | 1 | 1498 | 167.3 | 5.44 | 0    | 1 | metabolic    | cytoplasm;   | catalytic  | ai | P00038, F  | 2802   | ENSG0000 | GOLGA3     | 12        |             |             |            |      |      |      |      |           |      |      |           |   |

[illegible]



|       |        |                     |              |       |       |    |   |   |   |      |       |      |      |   |               |                        |                  |                   |                    |                  |             |             |             |            |      |      |      |      |      |      |      |          |      |   |
|-------|--------|---------------------|--------------|-------|-------|----|---|---|---|------|-------|------|------|---|---------------|------------------------|------------------|-------------------|--------------------|------------------|-------------|-------------|-------------|------------|------|------|------|------|------|------|------|----------|------|---|
| FALSE | Medium | Master Prc Q9NYB-1  | TGF-beta-1   | 0.011 | 2     | 2  | 1 | 1 | 1 | 693  | 76.4  | 8.54 | 0    | 1 | metabolic     | cytoplasm; metal ion   | P100641, F 23118 | ENSG000001TAB2    | 6                  | Epstein-Ba       | Regulation  | IRAK2 med   | 67          | High       | High | High | High | High | High | High | 1    |          |      |   |
| FALSE | High   | Master Prc P40188-1 | Interleukin  | 0.002 | 4.115 | 1  | 1 | 1 | 1 | 918  | 103.5 | 5.95 | 1.93 | 1 | metabolic     | extracellular          | protein          | P100041, F 3572   | ENSG000001LUST     | 5                | Signaling p | Physiologic | IL-6-type c | 26         | High | 1        |      |   |
| FALSE | Low    | Master Prc Q8TCT1   | Phosphoet    | 0.063 | 1.094 | 3  | 1 | 1 | 1 | 267  | 29.7  | 7.71 | 0    | 1 | metabolic     | cytosol                | catalytic a      | P100702, F 162466 | ENSG000001PHOSPHO1 | 17               | Glyceroph   | Synthesis c |             | 8          | High | 1 [Q233] |      |   |
| FALSE | High   | Master Prc Q96NU1   | Sterile alga | 0     | 5.207 | 2  | 1 | 2 | 1 | 681  | 72.7  | 7.59 | 5.01 | 1 | nucleus       | protein                | P107647          | 148398            | ENSG000001SAMD11   | 1                |             |             |             | 0          | High | 1        |      |   |
| FALSE | High   | Master Prc P62487   | DNA-direct   | 0.002 | 3.528 | 5  | 1 | 2 | 1 | 172  | 19.3  | 5.54 | 1.88 | 1 | cell death    | nucleus                | catalytic a      | P100575, F 5436   | ENSG000001POLR23   | 11               | Pyrimidine  | Eukaryotic  | Signaling b | 75         | High     | 1    |   |
| FALSE | High   | Master Prc Q15643   | Thyroid rec  | 0     | 6.469 | 1  | 1 | 1 | 1 | 1979 | 227.4 | 5.26 | 3.51 | 1 | cell differe  | cytoplasm; protein     | P104111, F 9321  | ENSG000001TRIP11  | 14                 |                  |             | Intra-Golgi | 7           | High       | High | High | High | High | High | High | High | 1        |      |   |
| FALSE | High   | Master Prc Q9UNK0   | Syntaxin-8   | 0     | 0.016 | 6  | 1 | 1 | 1 | 236  | 26.9  | 4.98 | 2.9  | 1 | cell organi   | cytosol;en             | protein          | P105739           | 9482               | ENSG000001STX8   | 17          | SNARE int   |             |            | 1    | High     | 1    |   |
| FALSE | High   | Master Prc Q9UL15-1 | BAG family   | 0.002 | 3.927 | 3  | 1 | 1 | 1 | 447  | 51.2  | 6.05 | 4.48 | 1 | cell death    | cytosol;en             | enzyme re        | P102179           | 9529               | ENSG000001BAG5   | 14          |             |             | Regulation | 4    | High     | High | 1 |
| FALSE | High   | Master Prc P49427   | ubiquitin c  | 0.003 | 3.061 | 5  | 1 | 1 | 1 | 236  | 26.7  | 4.54 | 0    | 1 | cell division | cytoplasm; catalytic a | P100179, F 997   | ENSG000001CD-C34  | 19                 | Ubiquitin r      |             | Synthesis c | 17          | High       | High | High | High | High | High | High | High | High     | 1    |   |
| FALSE | High   | Master Prc Q9NPAD   | ER membr     | 0     | 6.56  | 10 | 1 | 1 | 1 | 242  | 26.5  | 9.25 | 3.25 | 1 | membrane      |                        | P109430          | 56851             | ENSG000001EMC7     | 15               |             |             |             | 0          | High     | 1    |   |
| FALSE | High   | Master Prc P13121   | CAMP-dep     | 0.002 | 3.5   | 5  | 2 | 2 | 1 | 381  | 43    | 5.71 | 2.34 | 2 | coagulation   | cytosol;en             | enzyme re        | P100027, F 5575   | ENSG000001PKRARI8  | 7                | Insulin sig | miRs in M   | Signaling b | 32         | High     | High | 1 |
| FALSE | High   | Master Prc Q8X01-1  | SURP and     | 0     | 7.612 | 3  | 3 | 3 | 3 | 1082 | 120.1 | 7.28 | 1.64 | 3 | metabolic     | nucleus                | RNA bindi        | P101585, F 10147  | ENSG000001SUGP2    | 19               |             |             | mRNA Pro    | 1          | High     | 1    |   |
| FALSE | Medium | Master Prc Q8Y39-1  | NADH deh     | 0.012 | 1.958 | 8  | 1 | 1 | 1 | 141  | 14.8  | 8.72 | 0    | 1 | cell organi   | membrane               | catalytic a      |                   | 126328             | ENSG000001NDUAF1 | 19          | Alzheimer   | Oxidative   | Complex I  | 12   | High     | High | 1 |
| FALSE | High   | Master Prc Q8N8W7   | Retinol der  | 0.003 | 2.87  | 9  | 2 | 2 | 2 | 331  | 35.9  | 8.1  | 1.88 | 2 | metabolic     | membrane               | catalytic a      | P100106, F 112724 | ENSG000001RDH13    | 19; CHR_H        |             |             | RA biosynt  | 4          | High     | 1    |   |
| FALSE | Medium | Master Prc P98172   | ephriin-B1   | 0.016 | 1.073 | 5  | 1 | 1 | 1 | 346  | 38    | 8.94 | 0    | 1 | cell commu    | cytoplasm; protein     | P100812          | 1947              | ENSG000001EPN13    | 3                | Axon guid   |             | EPH-ephri   | 7          | High     | 1    |   |
| FALSE | High   | Master Prc Q9H40-3  | traB doma    | 0     | 6.255 | 6  | 2 | 2 | 2 | 376  | 42.3  | 8    | 4.05 | 2 |               |                        | P101963          | 80305             | ENSG000001TRABD    | 22               |             |             |             |            |      |      |      |      |      |      |      |          |      |   |

[illegible]

[illegible]

|       |        |                     |             |       |         |    |    |     |    |      |       |       |        |    |                                   |          |        |            |          |    |            |             |            |  |   |       |             |             |             |         |        |        |       |       |      |      |      |      |      |      |      |      |           |      |
|-------|--------|---------------------|-------------|-------|---------|----|----|-----|----|------|-------|-------|--------|----|-----------------------------------|----------|--------|------------|----------|----|------------|-------------|------------|--|---|-------|-------------|-------------|-------------|---------|--------|--------|-------|-------|------|------|------|------|------|------|------|------|-----------|------|
| FALSE | High   | Master Prc P2020-2  | isoform 2   | 0     | 119.099 | 67 | 12 | 49  | 1  | 162  | 17.7  | 7.5   | 132.42 | 12 | metabolic; cytosol; metal protein | PR18449  | 689    | ENSG000001 | BT3F     | 5  |            |             |            |  |   |       | 0           | 1.385       | 0.333650044 | 1.37    | 1029.1 | 854.3  | 29.68 | 13.88 | High | 1         | [K2] |
| FALSE | High   | Master Prc Q7609-1  | Protein ITI | 0     | 9.137   | 9  | 1  | 2   | 1  | 146  | 16.3  | 8.28  | 5.46   | 1  | cell death; cytoplasm; protein    | PR105439 | 10899  | ENSG000001 | ITB      | 2  |            |             |            |  |   |       | 0           | 1.384       | 0.109578199 | 24.3    | 282.7  | 204.6  | 17.98 | 0.27  | High | 1         |      |
| FALSE | High   | Master Prc P10606   | Cytocrom    | 0     | 36.615  | 36 | 8  | 29  | 8  | 129  | 13.7  | 8.81  | 38.43  | 8  | metabolic; cytoplasm; catalytic   | PR101215 | 1329   | ENSG000001 | COSX8    | 1  | Alzheimer  | Electron Tr | TP53 Regu  |  |   | 17    | 1.382       | 0.495628222 | 4.9         | 10819.2 | 8120.4 | 24.08  | 8.74  | High  | High | High | High | High | High | High | High | 1    |           |      |
| FALSE | High   | Master Prc Q5810-5  | Transmem    | 0.006 | 2.484   | 7  | 1  | 1   | 1  | 291  | 32.5  | 9.58  | 0      | 1  | membrane                          | PR09935  | 440026 | ENSG000001 | TMEM418  | 11 |            |             |            |  |   | 0     | 1.382       | 0.594948837 | 20.65       | 61.8    | 44.7   | 3.35   | 97.15 | High  | High | High | High | High | High | High | High | 1    |           |      |
| FALSE | High   | Master Prc Q9H33-1  | 39S riboso  | 0     | 10.491  | 12 | 3  | 4   | 1  | 250  | 29.4  | 10.37 | 8.36   | 3  | cell organi; membrane structural  | PR06984  | 57129  | ENSG000001 | MRPL47   | 1  |            |             |            |  |   | 6     | 1.38        | 0.007423246 | 6.36        | 1722.4  | 1196.6 | 6.65   | 12.17 | High  | High | High | High | High | High | High | High | 1    |           |      |
| FALSE | High   | Master Prc Q9Y97    | Probable A  | 0.009 | 2.104   | 3  | 1  | 1   | 1  | 483  | 54.2  | 9.06  | 1.69   | 1  | cell organi; cytoplasm; catalytic | PR00270  | 54555  | ENSG000001 | DDK49    | 19 |            |             |            |  |   | 5     | 1.378       | 0.130363327 | 28.76       | 346.7   | 203.1  | 26.94  | 18.9  | High  | High | High | High | High | High | High | High | 1    |           |      |
| FALSE | High   | Master Prc Q98X5-1  | AP-1 compo  | 0     | 11.059  | 10 | 3  | 3   | 3  | 423  | 48.6  | 7.3   | 9.9    | 3  | cell organi; cytosol; Gol         | PR00028  | 8907   | ENSG000001 | AP1M1    | 19 |            |             |            |  |   | 19    | 1.377       | 0.133160052 | 20.73       | 1018    | 761    | 10.06  | 14.75 | High  | High | High | High | High | High | High | High | 1    |           |      |
| FALSE | High   | Master Prc Q9Y508-1 | general tra | 0     | 11.096  | 8  | 3  | 4   | 3  | 519  | 59.5  | 6.9   | 2.55   | 3  | cell differe; nucleus             | PR09734  | 9328   | ENSG000001 | GTF3C5   | 9  |            |             |            |  |   | 6     | 1.374       | 0.152867601 | 16.12       | 1021.3  | 743.1  | 16.98  | 18.13 | High  | High | High | High | High | High | High | High | 1    |           |      |
| FALSE | High   | Master Prc Q00622   | Protein Cy  | 0     | 8.624   | 9  | 3  | 4   | 3  | 381  | 42    | 8.21  | 9.46   | 3  | cell comm; extracellular          | PR00077  | 3491   | ENSG000001 | CYR61    | 1  |            |             |            |  |   | 6     | 1.374       | 0.33045209  | 38.99       | 1636.9  | 1201.3 | 16.08  | 22.26 | High  | High | High | High | High | High | High | High | 1    |           |      |
| FALSE | High   | Master Prc Q60287   | nucleolar r | 0     | 5.731   | 1  | 1  | 1   | 1  | 2271 | 254.2 | 6.47  | 2.28   | 1  | nucleus                           | PR11707  | 9875   | ENSG000001 | URB1     | 21 |            |             |            |  |   | 0     | 1.372       | 0.22880731  | 4.51        | 291.4   | 294.3  | 33.26  | 25.05 | High  | High | High | High | High | High | High | High | 1    |           |      |
| FALSE | High   | Master Prc Q92620   | Ple-mRNA    | 0     | 6.689   | 2  | 2  | 2   | 2  | 1227 | 140.4 | 6.54  | 3.67   | 2  | metabolic; cytoplasm; catalytic   | PR00270  | 9785   | ENSG000001 | DHX38    | 16 | Spliceosom | mRNA Pro    | Cleavage o |  |   | 13    | 1.362       | 0.384859129 | 58.38       | 346.8   | 257.1  | 40.16  | 10.42 | High  | High | High | High | High | High | High | High | 1    |           |      |
| FALSE | High   | Master Prc Q00566   | U3 small n  | 0     | 16.48   | 7  | 5  | 5   | 5  | 681  | 78.8  | 4.86  | 7.72   | 5  | metabolic; chromoso               | PR04006  | 10199  | ENSG000001 | MPHOSPH  | 2  |            |             |            |  |   | 6     | 1.362       | 0.454227873 | 4.62        | 733.8   | 539.5  | 16.88  | 12.41 | High  | High | High | High | High | High | High | High | 1    |           |      |
| FALSE | High   | Master Prc Q9BUWA8  | Taukushin   | 0     | 5.182   | 4  | 1  | 1   | 1  | 353  | 37.8  | 6.87  | 4.27   | 1  | cell organi; extracellular        | PR12799  | 25987  | ENSG000001 | TSKU     | 11 |            |             |            |  |   | 1     | 1.361       | 0.189551725 | 10.98       | 151     | 120.3  | 11.62  | 12.04 | High  | High | High | High | High | High | High | High | 1    |           |      |
| FALSE | High   | Master Prc Q9BW86-1 | N-terminal  | 0     | 12.604  | 17 | 3  | 3   | 3  | 223  | 25.4  | 5.52  | 7.07   | 3  | cell organi; cytoplasm; catalytic | PR00891  | 28989  | ENSG000001 | NTMT1    | 9  |            |             |            |  |   | 0     | 1.359       | 0.081026857 | 23.1        | 293.4   | 214.8  | 2.49   | 22.11 | High  | High | High | High | High | High | High | High | 1    |           |      |
| FALSE | High   | Master Prc Q9BWK5   | dnaI homo   | 0     | 7.82    | 15 | 2  | 2   | 2  | 260  | 29.9  | 5.73  | 4.89   | 2  | regulation; cytoplasm; protein    | PR00226  | 23234  | ENSG000001 | DNAJC9   | 10 |            |             |            |  |   | 0     | 1.359       | 0.411702812 | 60.61       | 219.6   | 167.3  | 63.62  | 18.46 | High  | High | High | High | High | High | High | High | 1    |           |      |
| FALSE | High   | Master Prc Q96AY3   | Peptidyl-pi | 0     | 51.991  | 25 | 14 | 27  | 14 | 582  | 64.2  | 5.62  | 27.03  | 14 | cell organi; cytoplasm; catalytic | PR00254  | 60681  | ENSG000001 | KBP10    | 17 |            |             |            |  |   | 0     | 1.354       | 0.022031765 | 7.24        | 7682.7  | 5347.5 | 5.65   | 6.43  | High  | High | High | High | High | High | High | High | 1    |           |      |
| FALSE | High   | Master Prc Q9Y639-1 | isoform 1   | 0     | 6.815   | 5  | 1  | 1   | 1  | 282  | 31.3  | 6.87  | 3.65   | 1  | cellular ho; cell surface         | PR00047  | 27020  | ENSG000001 | NPTN     | 10 |            |             |            |  |   | 0     | 1.347       | 0.155524325 | 14.52       | 190.6   | 147.7  | 8.31   | 14.07 | High  | High | High | High | High | High | High | High | 1    |           |      |
| FALSE | High   | Master Prc Q6NUK1   | Calcium-bi  | 0     | 25.626  | 13 | 7  | 13  | 7  | 477  | 53.3  | 6.33  | 9.94   | 7  | regulation; membrane              | PR00036  | 29957  | ENSG000001 | SLC25A24 | 1  | CHR_HS     |             |            |  |   | 1     | 1.347       | 0.246982633 | 32.93       | 2884    | 2563.5 | 24.58  | 13.31 | High  | High | High | High | High | High | High | High | 1    |           |      |
| FALSE | High   | Master Prc Q75208-1 | Ubiquitin   | 0     | 11.052  | 17 | 3  | 3   | 3  | 318  | 35.5  | 5.94  | 5.79   | 3  | metabolic; membrane               | PR08511  | 57017  | ENSG000001 | CQO9     | 9  |            |             |            |  |   | 4     | 1.343       | 0.302592448 | 43.05       | 111.3   | 82.9   | 27     | 16.3  | High  | High | High | High | High | High | High | High | 1    |           |      |
| FALSE | High   | Master Prc Q9NPF2-2 | Neurin (C   | 0     | 10.475  | 14 | 4  | 5   | 4  | 291  | 32.4  | 9.1   | 7.5    | 4  | cell differe; extracellular       | PR05413  | 51335  | ENSG000001 | NGRN     | 15 |            |             |            |  |   | 0     | 1.34        | 0.16857734  | 30.53       | 577.9   | 443.2  | 15.6   | 15.16 | High  | High | High | High | High | High | High | High | 1    |           |      |
| FALSE | High   | Master Prc Q8T872-1 | pumilio ho  | 0     | 17.221  | 3  | 3  | 6   | 1  | 1066 | 114.1 | 7.08  | 15.32  | 3  | cell organi; cytoplasm; protein   | PR00806  | 23369  | ENSG000001 | PUM2     | 2  |            |             |            |  |   | 3     | 1.339       | 0.479344956 | 74.1        | 250.3   | 194.8  | 62.64  | 18.94 | High  | High | High | High | High | High | High | High | 1    |           |      |
| FALSE | High   | Master Prc P06733-2 | Syntenin-1  | 0     | 8.448   | 10 | 2  | 3   | 2  | 298  | 32.4  | 7.53  | 11.8   | 2  | cell comm; cytoplasm; protein     | PR05095  | 61386  | ENSG000001 | SDCBP    | 8  |            |             |            |  |   | 10    | 1.337       | 0.07186507  | 15.94       | 1841.7  | 1377.1 | 8.76   | 6.96  | High  | High | High | High | High | High | High | High | 1    |           |      |
| FALSE | High   | Master Prc Q6ZNB6-1 | nf-x1-type  | 0     | 9.317   | 4  | 3  | 3   | 3  | 911  | 101.3 | 8.41  | 5.93   | 3  | metabolic; membrane               | PR00086  | 152518 | ENSG000001 | NFXL1    | 4  |            |             |            |  |   | 0     | 1.336       | 0.416898312 | 61.1        | 750.3   | 561.6  | 61.92  | 14.67 | High  | High | High | High | High | High | High | High | 1    |           |      |
| FALSE | High   | Master Prc P06733-2 | isoform M   | 0     | 415.27  | 82 | 26 | 277 | 1  | 341  | 36.9  | 6.28  | 683.61 | 26 | metabolic; cell surface           | PR00113  | 2023   | ENSG000001 | ENO1     | 1  |            |             |            |  |   | 1     | 1.334       | 0.539956584 | 115.67      | 1292.8  | 969    | 127.84 | 87.97 | High  | High | High | High | High | High | High | High | 1    | [5277]100 |      |
| FALSE | High   | Master Prc Q43768   | alpha-end   | 0     | 18.07   | 42 | 5  | 10  | 4  | 121  | 13.4  | 7.24  | 15.24  | 5  | cell divisio; cytoplasm           | PR04667  | 2029   | ENSG000001 | ENSA     | 1  |            |             |            |  |   | 5     | 1.333       | 0.300820861 | 13.4        | 348.7   | 268.7  | 9.58   | 16.46 | High  | High | High | High | High | High | High | High | 1    |           |      |
| FALSE | High   | Master Prc P10696   | Alkaline ph | 0     | 19.87   | 55 | 25 | 69  | 8  | 532  | 57.3  | 6.34  | 169.87 | 25 | metabolic; extracellular          | PR00245  | 251    | ENSG000001 | ALPLP2   | 2  | Metabolic  |             |            |  |   | 6     | 1.333       | 0.694842324 | 67.13       | 4995.7  | 3749.1 | 33.39  | 26.54 | High  | High | High | High | High | High | High | High | 1    |           |      |
| FALSE | High   | Master Prc Q9XN40   | OCA domain  | 0     | 24.164  | 18 | 5  | 8   | 5  | 245  | 27.6  | 47.9  | 12.55  | 5  | regulation; endosome              | PR07051  | 54940  | ENSG000001 | OCA1D    | 1  |            |             |            |  |   | 0     | 1.33        | 0.041034524 | 12.11       | 769     | 585.5  | 10.07  | 14.49 | High  | High | High | High | High | High | High | High | 1    |           |      |
| FALSE | Medium | Master Prc Q9NR81-1 | isoform 2   | 0.047 | 1.227   | 2  | 1  | 1   | 1  | 558  | 63.7  | 6.92  | 20.8   | 1  | regulation; cytosol               | PR00621  | 50650  | ENSG000001 | ARHGFE3  | 3  |            |             |            |  |   | 0     | 1.33        | 0.440653387 | 18.27       | 108.5   | 97.6   | 23.87  | 16.2  | High  | High | High | High | High | High | High | High | 1    | [Q27]     |      |
| FALSE | High   | Master Prc P63316   | Tropomycin  | 0     | 6.614   | 9  | 1  | 1   | 1  | 161  | 18.4  | 4.18  | 4.47   | 1  | cellular co; cytosol              | PR00336  | 7134   | ENSG000001 | TNNC1    | 3  | Cardiac m; | MFAPS-me    | Striated M |  |   | 9     | 1.329       | 0.416774009 | 28.39       | 850.3   | 756    | 20.8   | 22.22 | High  | High | High | High | High | High | High | High | 1    |           |      |
| FALSE | High   | Master Prc Q9X188   | Succinate c | 0     | 8.012   | 19 | 3  | 3   | 3  | 166  | 19.6  | 6.88  | 3.84   | 3  | cell organi; cytosol; protein     | PR03937  | 54949  | ENSG000001 | SDHA2    | 11 |            |             |            |  |   | 0     | 1.325       | 0.871555006 | 8.6         | 185.2   | 140.9  | 19.62  | 25.02 | High  | High | High | High | High | High | High | High | 1    |           |      |
| FALSE | High   | Master Prc Q9BT25   | HAUS augr   | 0     | 10.431  | 11 | 3  | 4   | 3  | 410  | 44.8  | 7.06  | 39.1   | 3  | cell divisio; cytoplasm; protein  | PR09323  | 55858  | ENSG000001 | HAUS5    | 19 |            |             |            |  |   | 16    | 1.322       | 0.282447448 | 5.24        | 69.9    | 67.8   | 18.43  | 15.19 | High  | High | High | High | High | High | High | High | 1    |           |      |
| FALSE | High   | Master Prc Q9HC07   | Transmem    | 0     | 18.534  | 17 | 3  | 3   | 3  | 324  | 34.9  | 7.02  | 11.33  | 3  | cellular ho; endosome             | PR01169  | 11654  | ENSG000001 | TMEM165  | 4  |            |             |            |  |   | 0     | 1.321       | 0.409094362 | 53.78       | 1210.4  | 1114.2 | 69.51  | 18.4  | High  | High | High | High | High | High | High | High | 1    |           |      |
| FALSE | High   | Master Prc P07919   | Cytocrom    | 0     | 19.647  | 38 | 3  | 10  | 3  | 91   | 10.7  | 4.44  | 22.44  | 3  | metabolic; membrane               | PR02320  | 7388   | ENSG000001 | UCFH     | 1  | Metabolic  | Electron Tr | Respirator |  |   | 12    | 1.319       | 0.005849896 | 2.4         | 3680.5  | 2918.5 | 9.32   | 9.97  | High  | High | High | High | High | High | High | High | 1    |           |      |
| FALSE | High   | Master Prc Q15056-1 | isoform Sh  | 0     | 39.096  | 61 | 11 | 22  | 11 | 228  | 25.2  | 8.09  | 25.86  | 11 | cell organi; cytosol; catalytic   | PR00766  | 7458   | ENSG000001 | IQI4H    | 1  |            |             |            |  |   | 1     | 1.317       | 0.074371568 | 2.32        | 2896.8  | 2199   | 3.43   | 15.61 | High  | High | High | High | High | High | High | High | 1    |           |      |
| FALSE | High   | Master Prc Q9NR80   | Putative E  | 0     | 10.455  | 8  | 3  | 3   | 3  | 425  | 48    | 4.81  | 6.87   | 3  | metabolic; cytoplasm; catalytic   | PR02207  | 55148  | ENSG000001 | UBR7     | 1  | CHR_H      |             |            |  | 0 | 1.317 | 0.398657535 | 54.96       | 369.4       | 280.4   | 56.45  | 13.01  | High  | High  | High | High | High | High | High | High | 1    |      |           |      |
| FALSE | Medium | Master Prc Q6ANN6   | Nuclear p   | 0.029 | 1.434   | 2  | 1  | 1   | 1  | 443  | 51.2  | 10.49 | 0      | 1  | extracellular                     | PR06409  | 440348 | ENSG000001 | NPPB15   | 1  | 16         |             |            |  | 0 | 1.316 | 0.061865382 | 15.41       | 287.7       | 201.2   | 13.6   | 6.32   | High  | High  | High | High | High | High | High | High | 1    |      |           |      |
| FALSE | High   |                     |             |       |         |    |    |     |    |      |       |       |        |    |                                   |          |        |            |          |    |            |             |            |  |   |       |             |             |             |         |        |        |       |       |      |      |      |      |      |      |      |      |           |      |

|       |        |                     |              |       |         |    |    |     |    |      |       |       |        |    |              |                           |                 |                     |        |           |             |                      |             |           |             |             |             |         |         |        |       |      |      |      |      |      |      |         |          |  |
|-------|--------|---------------------|--------------|-------|---------|----|----|-----|----|------|-------|-------|--------|----|--------------|---------------------------|-----------------|---------------------|--------|-----------|-------------|----------------------|-------------|-----------|-------------|-------------|-------------|---------|---------|--------|-------|------|------|------|------|------|------|---------|----------|--|
| FALSE | High   | Master Prq PQ9651-2 | Isoform A1   | 0     | 268.742 | 86 | 31 | 111 | 1  | 320  | 34.2  | 9.23  | 302.05 | 31 | cell comm    | cytoplasm; DNA bindi      | P00076, F 3178  | ENSG000001HNRNP1    | 12     |           | mRNA Pro    |                      | 1           | 1.266     | 0.048347735 | 11.55       | 695.8       | 522     | 3.37    | 11.49  | High  | High | High | High | High | High | High | 1       | [R31];   |  |
| FALSE | High   | Master Prq P14209   | CD99 anti    | 0.002 | 4.112   | 5  | 1  | 2   | 1  | 185  | 18.8  | 4.75  | 4.97   | 1  | regulation   | cytoplasm; protein bi     | P12301, 4267    | ENSG000001C099      | X1Y, X | Leukocyte | Immunore    |                      | 7           | 1.266     | 0.315921247 | 34.75       | 1261.7      | 839.3   | 41.56   | 66.03  | High  | High | High | High | High | High | 1    |         |          |  |
| FALSE | High   | Master Prq Q98PW8   | Protein Nq   | 0     | 4.818   | 12 | 3  | 3   | 3  | 284  | 33.3  | 9.31  | 2.72   | 3  | membrane     | cytoplasm; protein bi     | P07978, 8508    | ENSG000001NBPNA1    | 22     |           |             |                      | 0           | 1.265     | 0.304905301 | 5.59        | 841.7       | 665.5   | 3.87    | 22.07  | High  | High | High | High | High | High | 1    |         |          |  |
| FALSE | High   | Master Prq Q98526   | Endoplasm    | 0     | 19.362  | 19 | 7  | 7   | 7  | 406  | 46.9  | 5.26  | 17.85  | 7  | cellular ho  | cell surface catalytic ac | P00085, 23071   | ENSG000001ERP44     | 9      |           | Neutrophil  |                      | 3           | 1.264     | 0.006168475 | 1.38        | 2532.1      | 1918    | 3.51    | 3.55   | High  | High | High | High | High | High | 1    |         |          |  |
| FALSE | High   | Master Prq P05026   | Sodium/pc    | 0     | 57.002  | 25 | 6  | 16  | 6  | 303  | 35    | 8.53  | 46.8   | 6  | cell comm    | membrane catalytic ac     | P000287, 481    | ENSG000001PTB181    | 1      |           | Thyroid ho  | Calcium Re ion homeo | 27          | 1.264     | 0.111493368 | 16.5        | 6137.3      | 4597.7  | 9.98    | 10.42  | High  | High | High | High | High | High | 1    |         |          |  |
| FALSE | High   | Master Prq Q45782   | E3 ubiquit   | 0     | 19.1    | 7  | 7  | 8   | 5  | 975  | 113.6 | 5.94  | 8.48   | 7  | cell organ   | nucleus catalytic ac      | P00097, 56254   | ENSG000001NFN30     |        |           | ATM Signa   | E3 ubiquit           | 5           | 1.264     | 0.506938701 | 67.53       | 459.6       | 376.4   | 52.36   | 13.01  | High  | High | High | High | High | High | 1    |         |          |  |
| FALSE | High   | Master Prq Q14657   | EKC/CEPP     | 0     | 5.447   | 16 | 1  | 2   | 1  | 143  | 14.8  | 8.63  | 0      | 1  | metabolic    | nucleus protein bi        | P09341, 8710    | ENSG000001LAGE3     | X      |           | tRNA modi   |                      | 3           | 1.263     | 0.168312547 | 25.34       | 32.8        | 23.4    | 26.03   | 18.61  | High  | High | High | High | High | High | 1    |         |          |  |
| FALSE | High   | Master Prq P61254   | 60S riboso   | 0     | 33.623  | 46 | 10 | 19  | 2  | 145  | 17.2  | 10.55 | 44.09  | 10 | cell organ   | cytoplasm; protein bi     | P00467, 6154    | ENSG000001KPL16     | 17     |           | Ribosome    | Cytoplasm            | 34          | 1.263     | 0.285917517 | 9.39        | 2645.9      | 2349.9  | 14.48   | 9.08   | High  | High | High | High | High | High | 1    |         |          |  |
| FALSE | High   | Master Prq P13051   | uracil-DNA   | 0     | 13.07   | 8  | 1  | 4   | 1  | 313  | 34.6  | 9.32  | 14.96  | 1  | metabolic    | mitochond catalytic ac    | P03167, 7374    | ENSG000001UNG       | 12     |           | Base excisi | Recogntio            | 10          | 1.263     | 0.489503091 | 59.73       | 64.6        | 51.2    | 38.88   | 16.61  | High  | High | High | High | High | High | 1    |         |          |  |
| FALSE | High   | Master Prq Q9NS69   | Mitochond    | 0     | 8.706   | 25 | 2  | 3   | 2  | 142  | 15.5  | 4.34  | 7.77   | 2  | cell comm    | membrane protein bi       | 56993           | ENSG000001TOMM22    | 22     |           | Mitochond   |                      | 4           | 1.263     | 0.703708066 | 55.95       | 1315.6      | 1041.4  | 35.44   | 18.19  | High  | High | High | High | High | High | 1    |         |          |  |
| FALSE | High   | Master Prq Q9BN59-1 | Thioredox    | 0     | 35.627  | 29 | 12 | 18  | 12 | 432  | 47.6  | 5.97  | 30.04  | 12 | cellular ho  | endoplasm catalytic ac    | P00085, F 81567 | ENSG000001TND05     | 6      |           | Protein pro | Neutrophil           | 10          | 1.262     | 0.32601289  | 4.86        | 4835.3      | 3830.1  | 16.19   | 2.42   | High  | High | High | High | High | High | 1    |         |          |  |
| FALSE | High   | Master Prq P08574   | Cytochrom    | 0     | 17.319  | 16 | 5  | 10  | 5  | 325  | 35.4  | 9     | 25.27  | 5  | metabolic    | membrane metal ion        | P02167, 1537    | ENSG000001CYC1      | 8      |           | Parkinson?  | Respirator           | 13          | 1.261     | 0.056598113 | 10.97       | 3271        | 2481.1  | 10.91   | 7.39   | High  | High | High | High | High | High | 1    |         |          |  |
| FALSE | High   | Master Prq Q9H9B4   | Sideroflex   | 0     | 68.356  | 46 | 9  | 23  | 8  | 322  | 35.6  | 9.07  | 59.92  | 9  | cell differe | membrane transporte       | P03820, 94081   | ENSG000001SFXN1     | X      |           |             |                      | 0           | 1.261     | 0.153453186 | 19.69       | 9066.4      | 6864    | 13.99   | 12.51  | High  | High | High | High | High | High | 1    |         |          |  |
| FALSE | High   | Master Prq Q00625   | Pinin [OS=   | 0     | 37.862  | 33 | 7  | 12  | 7  | 290  | 32.1  | 6.92  | 28.99  | 7  | cell differe | cytoplasm; catalytic ac   | P02678, F 8544  | ENSG000001PIR       | 5      |           | Digestion   |                      | 2           | 1.26      | 0.076207807 | 8.82        | 4390.1      | 3484.5  | 9.78    | 3.53   | High  | High | High | High | High | High | 1    |         |          |  |
| FALSE | Medium | Master Prq Q9NP4-1  | Double zinc  | 0.029 | 1.433   | 2  | 1  | 1   | 1  | 752  | 82.1  | 8.06  | 0      | 1  |              | metal ion                 | P03174, F 55184 | ENSG000001OZANK1    | 20     |           |             |                      | 0           | 1.26      | 0.128848204 | 17          | 729.9       | 577.4   | 8.09    | 12.12  | High  | High | High | High | High | High | 1    | [R690]; |          |  |
| FALSE | High   | Master Prq Q9H9E3-1 | Conserved    | 0     | 7.208   | 4  | 3  | 3   | 3  | 785  | 89    | 5.19  | 7.48   | 3  | cell organ   | endoplasm protein bi      | P08818, 25839   | COG4                | 16     |           |             | COP1-medi            | 11          | 1.26      | 0.228784483 | 15.18       | 319.6       | 259.6   | 12.4    | 6.66   | High  | High | High | High | High | High | 1    |         |          |  |
| FALSE | High   | Master Prq P28331-1 | NADH-ubiq    | 0     | 99.821  | 34 | 17 | 24  | 17 | 727  | 79.4  | 6.23  | 59.73  | 17 | cell organ   | membrane catalytic ac     | P00111, F 4719  | ENSG000001NDFU51    | 2      |           | CHR_HS      | Oxidative E          | Electron Tr | Complex 1 | 13          | 1.26        | 0.286956931 | 0.61    | 6820.2  | 5641.7 | 13.4  | 3.84 | High | High | High | High | High | High    | 1        |  |
| FALSE | High   | Master Prq Q07581   | Paralelmi    | 0     | 6.523   | 7  | 3  | 3   | 3  | 387  | 42.1  | 5     | 3.61   | 3  | cell organ   | cytoplasm; protein bi     | P03285, 5064    | ENSG000001PALM      | 19     |           |             |                      | 0           | 1.259     | 0.333235716 | 4.05        | 645.4       | 552.2   | 9.4     | 11.4   | High  | High | High | High | High | High | 1    |         |          |  |
| FALSE | High   | Master Prq Q9A0B-1  | mitochond    | 0     | 8.636   | 10 | 3  | 3   | 3  | 359  | 39.7  | 6.63  | 4.98   | 3  | cellular ho  | membrane protein bi       | P07798, 63933   | ENSG000001CCDC0A    | 9      |           |             |                      | 0           | 1.258     | 0.166713919 | 11.78       | 2413.4      | 1925.1  | 5.48    | 11.08  | High  | High | High | High | High | High | 1    |         |          |  |
| FALSE | High   | Master Prq Q9BWB6   | Chromoso     | 0     | 7.686   | 2  | 1  | 2   | 1  | 975  | 107.3 | 7.21  | 4.04   | 1  | metabolic    | cytosol; me catalytic ac  | P00004, F 63922 | ENSG000001CHT18     | 16     |           |             | Gastric car          | 1           | 1.258     | 0.405062351 | 33.19       | 791         | 709.5   | 32.78   | 8.78   | High  | High | High | High | High | High | 1    |         |          |  |
| FALSE | High   | Master Prq Q14699   | rafflin [OS= | 0     | 19.432  | 11 | 3  | 3   | 3  | 578  | 63.1  | 5.67  | 10.43  | 3  | cell organ   | cytoplasm; RNA bindi      | P15250, 23180   | ENSG000001RTN1      | 3      |           |             |                      | 0           | 1.258     | 0.491808201 | 61.93       | 21.8        | 17.3    | 33.84   | 16.62  | High  | High | High | High | High | High | 1    |         |          |  |
| FALSE | High   | Master Prq P06576   | ATP synth    | 0     | 394.452 | 74 | 26 | 148 | 26 | 529  | 56.5  | 5.4   | 491.8  | 26 | cell differe | cell surface catalytic ac | P00006, F 506   | ENSG000001ATP5B     | 12     |           | Huntingtin  | Electron Tr          | Transcripti | 17        | 1.256       | 0.367175758 | 19.01       | 47140.5 | 38033.4 | 17.4   | 6.78  | High | High | High | High | High | High | 1       |          |  |
| FALSE | High   | Master Prq Q5VTL8   | Pre-mRNA     | 0     | 5.258   | 5  | 2  | 2   | 2  | 546  | 64.4  | 10.54 | 3      | 2  | metabolic    | nucleus; sp               | P03371, 55119   | ENSG000001PRF388    | 1      |           | Spliceosom  |                      | 1           | 1.256     | 0.44444627  | 64.74       | 466.3       | 331     | 51.74   | 25.63  | High  | High | High | High | High | High | 1    |         |          |  |
| FALSE | High   | Master Prq Q96DV4   | 39S riboso   | 0     | 11.286  | 11 | 4  | 6   | 4  | 380  | 44.6  | 7.53  | 10.71  | 4  | cell organ   | membrane                  | P001161, 64978  | ENSG000001MRPL38    | 17     |           |             | Mitochond            | 6           | 1.255     | 0.221746262 | 25.68       | 1141.3      | 915.7   | 19.59   | 15.18  | High  | High | High | High | High | High | 1    |         |          |  |
| FALSE | High   | Master Prq Q96H7    | ERO1-like    | 0     | 25.81   | 22 | 8  | 9   | 8  | 468  | 54.4  | 5.68  | 16.9   | 8  | cell death   | endoplasm catalytic ac    | P04317, 30001   | ENSG000001ERL1; ERI | 14     |           | Vibrio chol | Insulin pro          | 8           | 1.254     | 0.11774576  | 4.21        | 2766.6      | 2205.9  | 6.96    | 4.39   | High  | High | High | High | High | High | 1    |         |          |  |
| FALSE | High   | Master Prq P35659-1 | Protein Dc   | 0     | 8.199   | 6  | 2  | 3   | 2  | 375  | 42.6  | 8.56  | 5.64   | 2  | cell organ   | nucleus DNA bindi         | P02037, F 7913  | ENSG000001DEK       | 6      |           |             | Transcripti          | 7           | 1.253     | 0.264994074 | 31.37       | 96.6        | 77.1    | 15.39   | 14.49  | High  | High | High | High | High | High | 1    |         |          |  |
| FALSE | High   | Master Prq Q43148-1 | mRNA cap     | 0     | 7.881   | 4  | 2  | 3   | 2  | 476  | 54.8  | 6.61  | 6.07   | 2  | metabolic    | nucleus catalytic ac      | P03291, 8731    | ENSG000001RNMT      | 18     |           | mRNA surv   | mRNA Pro             | RNA Pol II  | 14        | 1.252       | 0.466895094 | 65.78       | 359.6   | 317     | 84.87  | 24.98 | High | High | High | High | High | High | 1       |          |  |
| FALSE | High   | Master Prq Q69YH5-1 | cell divisio | 0     | 5.75    | 2  | 1  | 2   | 1  | 1023 | 112.6 | 8.4   | 2.15   | 1  | cell divisi  | chromosom                 | P15276, 157313  | ENSG000001CDA2      | 8      |           |             |                      | 0           | 1.252     | 0.472972635 | 52.1        | 372.7       | 334.3   | 32.83   | 18.24  | High  | High | High | High | High | High | 1    |         |          |  |
| FALSE | High   | Master Prq P60033   | CD81 anti    | 0     | 7.663   | 10 | 1  | 1   | 1  | 236  | 25.8  | 5.29  | 5.81   | 1  | cell profil  | membrane protein bi       | P03035, 975     | ENSG000001CDB1      | 11     |           | Hepatitis C | B Cell Rec           | Regulation  | 10        | 1.252       | 0.636793288 | 2.91        | 180.8   | 152.2   | 18.91  | 8.55  | High | High | High | High | High | High | 1       |          |  |
| FALSE | High   | Master Prq P09669   | Cytochrom    | 0     | 4.551   | 37 | 3  | 4   | 3  | 75   | 8.8   | 10.39 | 3.66   | 3  | metabolic    | membrane catalytic ac     | P02937, 1345    | ENSG000001CX6C      | 8      |           | Non-alcohol | Electron Tr          | TP53 Regul  | 17        | 1.252       | 0.820793249 | 5.57        | 457.5   | 374.2   | 12.27  | 20.93 | High | High | High | High | High | High | 1       |          |  |
| FALSE | High   | Master Prq Q98R6-1  | ADP-deper    | 0     | 25.848  | 8  | 3  | 6   | 3  | 497  | 54.1  | 6.2   | 20.19  | 3  | metabolic    | endoplasm catalytic ac    | P04587, 83440   | ADPGK               | 15     |           | Carbon me   | Glycolysis           | 7           | 1.251     | 0.159374092 | 16.73       | 1458        | 1244.9  | 19.06   | 7.37   | High  | High | High | High | High | High | 1    |         |          |  |
| FALSE | High   | Master Prq Q9747-1  | ATP synth    | 0     | 79.292  | 80 | 11 | 32  | 11 | 161  | 18.5  | 5.3   | 81.3   | 11 | cell organ   | cytosol; me catalytic ac  | P05073, 10476   | ENSG000001ATP5B     | 17     |           | Oxidative E | Electron Tr          | Citrate cyc | 14        | 1.251       | 0.386623686 | 14          | 7765.7  | 6490.8  | 18.98  | 4.82  | High | High | High | High | High | High | 1       |          |  |
| FALSE | High   | Master Prq P27284   | Catechin [C  | 0     | 226.769 | 46 | 31 | 117 | 31 | 592  | 67.5  | 4.6   | 312.17 | 31 | metabolic    | cytoplasm; metal ion      | P02062, 821     | ENSG000001CANX      | 5      |           | CHR_H       | HTLV-1 infe          | Assembly c  | 25        | 1.25        | 0.147896253 | 2.48        | 41926.3 | 35527.4 | 6.43   | 7.54  | High | High | High | High | High | High | 1       |          |  |
| FALSE | High   | Master Prq Q9UHV9   | Prefoldin s  | 0     | 27.377  | 51 | 7  | 10  | 7  | 154  | 16.6  | 6.58  | 10.41  | 7  | metabolic    | cytoplasm; protein bi     | P01920, 5202    | ENSG000001PFDM2     | 1      |           |             | Prefoldin r          | 5           | 1.25      | 0.403072471 | 2.55        | 2148.4      | 1689.9  | 24.68   | 6.65   | High  | High | High | High | High | High | 1    |         |          |  |
| FALSE | High   | Master Prq Q9NR84-1 | Ribonucle    | 0.003 | 3.018   | 2  | 2  | 2   | 2  | 1374 | 159.2 | 7.87  | 0      | 2  | defense re   | membrane catalytic ac     | P00035, F 29102 | ENSG000001DROSHA    | 5      |           | Proteoglyc  | mRNA Bio             | MicroRNA    | 8         | 1.25        | 0.548620571 | 70.55       | 1012.6  | 904.9   | 58.85  | 28.02 | High | High | High | High | High | High | 1       | [Q1096]; |  |
| FALSE | High   | Master Prq P42694   | Probable h   | 0.009 | 2.147   | 1  | 2  | 3   | 1  | 1942 | 218.8 | 7.42  | 5.02   | 1  |              | membrane catalytic ac     | P05080, F 9931  | ENSG000001HEL5      | 17     |           |             |                      | 0           | 1.25      | 0.578359685 | 97.13       | 1069.8      | 1100    | 96.35   | 34.48  | High  | High | High | High | High | High | 1    |         |          |  |
| FALSE | High   | Master Prq Q9Y679-1 | Ancient ub   | 0     | 9.905   | 6  | 2  | 4   | 2  | 476  | 53    | 8.09  | 4.69   | 2  | metabolic    | endoplasm enzyme re       | P02845, 550     | AUP1                | 2      |           |             |                      | 0           | 1.249     | 0.190599262 | 18.36       | 800.9       | 587.2   | 17.9    | 13.52  | High  | High | High | High | High | High | 1    |         |          |  |
| FALSE | Medium | Master Prq Q9BXK7   | voltage-de   | 0.048 | 1.223   | 3  | 1  | 1   | 1  | 260  | 28.1  | 9.17  | 0      | 1  | regulation   | membrane transporte       | P13303, 59285   | ENSG000001CACGG6    | 19     |           | Cardiac me  | Arrhythmic           | Phase 0 - r | 12        | 1.246       | 0.013438827 | 2.67        | 1151.6  | 940.8   | 13.26  | 11.81 | High | High | High | High | High | High | 1       |          |  |
| FALSE | High   | Master Prq Q7       |              |       |         |    |    |     |    |      |       |       |        |    |              |                           |                 |                     |        |           |             |                      |             |           |             |             |             |         |         |        |       |      |      |      |      |      |      |         |          |  |

|       |        |                     |             |       |         |    |    |     |    |      |       |       |         |    |             |              |                   |                   |            |            |         |    |              |             |             |       |             |             |        |          |         |       |       |      |      |      |      |      |      |      |              |
|-------|--------|---------------------|-------------|-------|---------|----|----|-----|----|------|-------|-------|---------|----|-------------|--------------|-------------------|-------------------|------------|------------|---------|----|--------------|-------------|-------------|-------|-------------|-------------|--------|----------|---------|-------|-------|------|------|------|------|------|------|------|--------------|
| FALSE | High   | Master Prq P13473-1 | Lysosome-   | 0     | 4.909   | 4  | 2  | 2   | 2  | 410  | 44.9  | 5.63  | 0       | 2  | cell comm   | endosome     | protein br        | P101299           | 3920       | ENSG000001 | LAMP2   | X  | Tuberculosis | Sensencsc   | Platelet de | 11    | 1.225       | 0.109807086 | 13.67  | 528.6    | 431.7   | 5.29  | 6.59  | High | 1            |
| FALSE | High   | Master Prq C000468  | Agrin [DS-  | 0     | 22.991  | 4  | 4  | 5   | 4  | 2067 | 217.1 | 6.39  | 16.62   | 4  | cell differ | cytosol;ext  | metal ion         | P00050, F 375790  |            | ENSG000001 | AGRN    | 1  | ECM-recep    | Primary FG  | Integrin ce | 32    | 1.225       | 0.281539752 | 24.44  | 998.4    | 882     | 29.99 | 7.84  | High | 1            |
| FALSE | High   | Master Prq C000914  | Striatin-4  | 0     | 10.347  | 4  | 1  | 1   | 1  | 753  | 80.5  | 5.4   | 6.2     | 1  | metabolic   | cytoplasm;   | protein br        | P00090, F 29888   | 19         | ENSG000001 | STRN13  | 1  |              |             |             | 0     | 1.225       | 0.515231367 | 67.37  | 677      | 610.1   | 61.72 | 12.96 | High | 1            |
| FALSE | High   | Master Prq Q9Y389   | RRP15-like  | 0     | 23.445  | 18 | 5  | 11  | 5  | 282  | 31.5  | 5.52  | 19.98   | 5  | metabolic   | cytoplasm;   | protein br        | P007890           | 55108      | ENSG000001 | RRP15   | 1  |              |             |             | 0     | 1.224       | 0.29526736  | 21.55  | 1559.1   | 1369.2  | 18.89 | 4.7   | High | 1            |
| FALSE | High   | Master Prq Q06Q24   | Spermatog   | 0     | 22.653  | 12 | 5  | 6   | 5  | 545  | 59.5  | 8.9   | 15.27   | 5  | cytoplasm;  | protein br   | P007139           | 65244             | ENSG000001 | SPR25      | 12      |    |              |             | 0           | 1.224 | 0.486635425 | 78.12       | 528.4  | 447.7    | 101.78  | 29.72 | High  | High | High | High | High | High | High | 1    |              |
| FALSE | High   | Master Prq P14406   | Cytochrom   | 0     | 16.912  | 30 | 3  | 4   | 3  | 83   | 9.4   | 9.76  | 10.01   | 3  | metabolic   | membrane     | catalytic a       | P002338           | 1347       | ENSG000001 | CYOXA2  | 6  | Alzheimer'   | Electron Tr |             | 7     | 1.223       | 0.038164733 | 6.25   | 1497.9   | 1224.7  | 11.17 | 5.65  | High | 1            |
| FALSE | High   | Master Prq P16445   | NADPH-cy    | 0     | 68.275  | 23 | 14 | 31  | 14 | 677  | 76.6  | 5.58  | 52.29   | 14 | metabolic   | endoplasm    | catalytic a       | P000175, F 5447   |            | ENSG000001 | POR     | 7  |              |             | Cytochrom   | 4     | 1.223       | 0.217762614 | 7.1    | 11873.6  | 10033.9 | 14.96 | 3.61  | High | 1            |
| FALSE | Medium | Master Prq C14936   | peripheral  | 0.048 | 1.219   | 1  | 1  | 1   | 1  | 926  | 105.1 | 6.43  | 1.62    | 1  | metabolic   | cytoplasm;   | catalytic a       | P000018, F 8573   |            | ENSG000001 | CASK    | X  | Tight junct  | Parlin-Ub   | Neuprin fu  | 13    | 1.222       | 0.30887399  | 32.87  | 303.4    | 248.3   | 16.45 | 11.64 | High | 1            |
| FALSE | High   | Master Prq P31150   | Rab GGP d   | 0     | 49.195  | 24 | 9  | 18  | 4  | 447  | 50.6  | 5.14  | 53.14   | 9  | metabolic   | cytoplasm;   | catalytic a       | P000996           | 2664       | ENSG000001 | GDI1    | X  | Integrated   | RAB GEFs c  |             | 8     | 1.221       | 0.189726675 | 14.71  | 306.5    | 251     | 34.31 | 18.44 | High | 1            |
| FALSE | High   | Master Prq P31930   | Cytochrom   | 0     | 102.173 | 36 | 11 | 34  | 10 | 480  | 52.6  | 6.37  | 109.14  | 11 | metabolic   | cytosol;me   | catalytic a       | P000675, F 7384   |            | ENSG000001 | UCRC1   | 3  | Huntingtor   | Electron Tr | Respirator  | 12    | 1.221       | 0.336162383 | 20.99  | 12526    | 10262.5 | 15.9  | 4.86  | High | 1            |
| FALSE | High   | Master Prq Q9UPN7   | Serine/thr  | 0     | 5.173   | 1  | 1  | 1   | 1  | 881  | 96.7  | 4.55  | 0       | 1  | cell organ; | cytoplasm;   | protein br        | P001354, F 22870  |            | ENSG000001 | PPP6R1  | 19 |              |             | COPII (Coa  | 8     | 1.221       | 0.888957898 | 3.77   | 269.1    | 247.1   | 17.81 | 25.93 | High | 1            |
| FALSE | High   | Master Prq Q43493-1 | Trans-Gol   | 0     | 10.798  | 11 | 5  | 5   | 5  | 480  | 51.1  | 5.73  | 2.6     | 5  | cell organ; | cytosol;eni  | protein br        | 10618             |            | ENSG000001 | TGOLN2  | 2  |              |             | Post-transl | 13    | 1.219       | 0.159847245 | 1.16   | 1224.1   | 1012    | 22.94 | 1.11  | High | 1            |
| FALSE | High   | Master Prq Q8TBF4   | Zinc finger | 0.004 | 2.71    | 4  | 1  | 2   | 1  | 217  | 24.6  | 8.53  | 1.8     | 1  | metabolic   | nucleus;sp   | metal ion         | P000076, F 85437  |            | ENSG000001 | ZC8R1   | 12 |              |             | mRNA Spli   | 4     | 1.219       | 0.255557225 | 16     | 969.6    | 773.8   | 30.19 | 11.94 | High | 1            |
| FALSE | High   | Master Prq Q92734-1 | Protein TF  | 0     | 41.605  | 34 | 9  | 11  | 9  | 400  | 43.4  | 5.1   | 19.33   | 9  | cell organ; | cytoplasm;   | protein br        | P00564, F 10342   |            | ENSG000001 | TFG     | 3  | Thyroid cas  | COPII (Coa  |             | 10    | 1.218       | 0.016427817 | 5.56   | 1239.2   | 1017.2  | 4.22  | 10.47 | High | 1            |
| FALSE | High   | Master Prq Q96EC8-1 | Protein YIF | 0     | 9.738   | 9  | 3  | 3   | 3  | 236  | 26.2  | 5.64  | 2.54    | 3  | endoplasm   | protein br   | P04893            | 286451            | ENSG000001 | YIPF6      | X       |    |              | Golgi Assoc | 5           | 1.218 | 0.044596018 | 0.76        | 236.9  | 195.8    | 4.79    | 1.34  | High  | High | High | High | High | High | High | 1    |              |
| FALSE | High   | Master Prq Q13586   | stromal int | 0     | 7.051   | 4  | 2  | 2   | 2  | 685  | 77.4  | 6.67  | 4.62    | 2  | cellular ho | cytoplasm;   | metal ion         | P00430, F 6786    |            | ENSG000001 | STIM1   | 11 | Calcium sig  | Ion homeo   |             | 13    | 1.217       | 0.192380738 | 17.03  | 390.9    | 321.3   | 13.06 | 10.59 | High | 1            |
| FALSE | High   | Master Prq P62987   | Ubiquitin   | 0     | 38.408  | 50 | 7  | 30  | 2  | 128  | 147   | 9.83  | 64.1    | 7  | cell comm   | cytoplasm;   | protein br        | P00240, F 7311    |            | ENSG000001 | UBA52   | 19 | Ribosome     | DNA Repli   | NOTCH1 tr   | 361   | 1.217       | 0.396469027 | 22.09  | 1397.9   | 1148.8  | 20.13 | 2.64  | High | 1            |
| FALSE | High   | Master Prq C13KM03  | heterogen   | 0     | 110.014 | 30 | 19 | 30  | 19 | 747  | 85.1  | 4.91  | 63.77   | 19 | membrane    | protein br   | P000622, F 221092 |                   | ENSG000001 | HNRNPUL    | 11      |    |              |             | 0           | 1.216 | 0.13216932  | 9.37        | 5810.8 | 4634.8   | 14.55   | 6.55  | High  | High | High | High | High | High | High | 1    |              |
| FALSE | High   | Master Prq Q95182   | NADH deH    | 0     | 18.845  | 33 | 3  | 5   | 3  | 113  | 12.5  | 10.18 | 8.98    | 3  | cell organ; | membrane     | catalytic a       | P007347           | 4701       | ENSG000001 | NADUFA7 | 19 | Parkinson'   | Electron Tr | Complex i   | 13    | 1.216       | 0.336983374 | 15.82  | 1636     | 1345.6  | 11.43 | 8.29  | High | 1            |
| FALSE | High   | Master Prq Q5UC64-1 | ER membr    | 0     | 10.321  | 9  | 2  | 2   | 2  | 262  | 27.3  | 6.13  | 4.04    | 2  | extracellul |              |                   | 284361            |            | ENSG000001 | EMC10   | 19 |              |             |             | 0     | 1.216       | 0.900895736 | 10.14  | 500.4    | 421.2   | 35.23 | 14.29 | High | 1            |
| FALSE | High   | Master Prq Q16822-1 | Phosphoiso  | 0     | 32.372  | 17 | 7  | 9   | 7  | 640  | 70.7  | 8.62  | 21.35   | 7  | cellular ho | mitochond    | catalytic a       | P00821            | 5106       | ENSG000001 | PCK2    | 14 | Pyruvate re  | Adipogene   | Glucoseox   | 21    | 1.215       | 0.2629629   | 16.76  | 1743.3   | 1435.1  | 48.94 | 26.7  | High | 1            |
| FALSE | High   | Master Prq Q50552   | Vasodilator | 0     | 53.817  | 34 | 10 | 16  | 10 | 380  | 39.8  | 7.94  | 30.52   | 10 | cell organ; | cytoplasm;   | protein br        | P00568            | 7408       | ENSG000001 | VASP    | 19 | Leukocyte    | Integrin m  | Cell-extrac | 18    | 1.215       | 0.277038955 | 13.71  | 3882.3   | 3194.7  | 8.67  | 8.29  | High | 1            |
| FALSE | High   | Master Prq P10809   | 60 kDa he   | 0     | 682.116 | 82 | 53 | 471 | 53 | 573  | 61    | 5.87  | 1230.33 | 53 | cell organ; | cell surface | catalytic a       | P00118            | 3329       | ENSG000001 | HSP01   | 2  | RNA degra    | Apoptosis-  | TFAP2A ac   | 13    | 1.215       | 0.489983504 | 20.7   | 131000.8 | 10781.7 | 11.66 | 11.46 | High | 1 [567(99.2) |
| FALSE | High   | Master Prq Q7269    | E3 ubiquiti | 0     | 6.897   | 2  | 2  | 2   | 2  | 1792 | 201.4 | 9.64  | 7.24    | 2  | metabolic   | chromoso     | catalytic a       | P00097, F 5930    |            | ENSG000001 | RBBP6   | 16 |              |             |             | 4     | 1.214       | 0.169457888 | 16.96  | 761.5    | 628.5   | 14.35 | 1.05  | High | 1            |
| FALSE | High   | Master Prq Q51729   | alanine-IR  | 0     | 39.212  | 15 | 9  | 11  | 9  | 985  | 107.3 | 6.27  | 28.42   | 9  | cell organ; | cytoplasm;   | catalytic a       | P001411, F 57505  |            | ENSG000001 | AARS2   | 5  | Aminoacyl-   |             | Mitochond   | 5     | 1.214       | 0.391168678 | 38.3   | 4269.9   | 3723.9  | 22.21 | 14.3  | High | 1            |
| FALSE | High   | Master Prq Q9HD15   | Steroid rec | 0     | 7.528   | 13 | 2  | 2   | 2  | 236  | 25.7  | 7.03  | 1.1     | 2  | cell death; | cytoplasm;   | protein br        | P007304           | 10011      | ENSG000001 | SRA1    | 1  |              |             |             | 0     | 1.214       | 0.452493169 | 53.78  | 380.1    | 336     | 78.82 | 24.99 | High | 1            |
| FALSE | High   | Master Prq Q9GZP4   | PITF dom    | 0.003 | 3.482   | 6  | 1  | 1   | 1  | 211  | 24.2  | 5.74  | 3.24    | 1  | response i  | nucleus      |                   | P06201            | 57095      | ENSG000001 | PITFD1  | 1  |              |             |             | 0     | 1.213       | 0.031592243 | 9      | 805.8    | 692     | 11.8  | 12.39 | High | 1            |
| FALSE | High   | Master Prq P23219   | Prostaglan  | 0     | 16.36   | 13 | 6  | 8   | 6  | 599  | 68.6  | 7.23  | 17.53   | 6  | defense re  | cytoplasm;   | antioxidan        | P00008, F 5742    |            | ENSG000001 | PTGS1   | 5  | Serotonerg   | Selenium H  | COX reacti  | 17    | 1.213       | 0.208955379 | 18.6   | 2660.4   | 2177.9  | 17.16 | 8.37  | High | 1            |
| FALSE | High   | Master Prq P55809   | Succinyl-Co | 0     | 205.374 | 52 | 24 | 91  | 24 | 520  | 56.1  | 7.46  | 256.83  | 24 | metabolic   | mitochond    | catalytic a       | P001144           | 5019       | ENSG000001 | OXCT1   | 5  | Synthesis a  | Synthesis a | Utilization | 8     | 1.213       | 0.414029092 | 21.21  | 31394.2  | 25871.3 | 12.45 | 10.71 | High | 1            |
| FALSE | High   | Master Prq Q960X5   | Ankyrin re  | 0     | 10.192  | 13 | 2  | 2   | 2  | 294  | 31.8  | 6.98  | 5.06    | 2  | metabolic   | cytosol;mi   | protein br        | P00678, F 140462  |            | ENSG000001 | ASB9    | 8  |              |             | Antigen pr  | 7     | 1.213       | 0.476912221 | 50.34  | 463.4    | 456     | 41.45 | 12.18 | High | 1            |
| FALSE | High   | Master Prq Q9NDU8   | UPF0600 p   | 0     | 6.934   | 12 | 2  | 2   | 2  | 294  | 33.6  | 5.26  | 2.2     | 2  | cytosol     |              |                   | 285636            |            | ENSG000001 | Csorf51 | 5  |              |             |             | 0     | 1.213       | 0.91961512  | 0.88   | 27.2     | 25.1    | 18.99 | 20.59 | High | 1            |
| FALSE | High   | Master Prq Q43678   | NADH deH    | 0     | 15.75   | 46 | 4  | 9   | 4  | 99   | 109   | 9.57  | 15.82   | 4  | cell organ; | membrane     | catalytic a       | P005047           | 4695       | ENSG000001 | NADUFA2 | 5  | Huntingtor   | Electron Tr | Complex i   | 13    | 1.212       | 0.01419373  | 8.54   | 2862.3   | 2566.9  | 8.94  | 8.97  | High | 1            |
| FALSE | High   | Master Prq P42166   | Lamina-as   | 0     | 49.28   | 19 | 8  | 17  | 4  | 694  | 75.4  | 7.66  | 41.07   | 8  | regulation  | chromoso     | DNA bindi         | P003020, F 7112   |            | ENSG000001 | TMP3    | 12 |              |             |             | 0     | 1.212       | 0.1963158   | 21.64  | 2353.3   | 1941.8  | 12.95 | 5.84  | High | 1 [T74(100)  |
| FALSE | High   | Master Prq Q518A6-1 | Transport-  | 0     | 26.148  | 4  | 8  | 9   | 8  | 1907 | 213.6 | 4.84  | 15.53   | 8  | cell organ; | endoplasm    | protein br        | P002463, F 375056 |            | ENSG000001 | MIA3    | 10 |              |             | Post-transl | 10    | 1.212       | 0.176643117 | 13.73  | 719.9    | 643     | 7.63  | 10.33 | High | 1            |
| FALSE | High   | Master Prq C13151   | Heterogen   | 0     | 89.759  | 40 | 13 | 39  | 12 | 305  | 30.8  | 9.29  | 90.87   | 13 | defense re  | nucleus      | protein br        | P00076, F 10949   |            | ENSG000001 | HNRNPAD | 5  |              |             | mRNA Spli   | 4     | 1.211       | 0.21982356  | 0.34   | 8562.3   | 7408.7  | 9.13  | 3.93  | High | 1            |
| FALSE | High   | Master Prq Q00784   | Target of h | 0     | 7.786   | 4  | 1  | 1   | 1  | 492  | 53.8  | 4.7   | 4.97    | 1  | transport   | cytoplasm;   | protein br        | P00790, F 10043   |            | ENSG000001 | TMPO    | 22 | Neutrophil   |             |             | 3     | 1.211       | 0.551536087 | 41.07  | 148.6    | 160.2   | 37.79 | 14.74 | High | 1            |
| FALSE | High   | Master Prq Q335M5   | inactive hy | 0     | 11.984  | 17 | 3  | 3   | 3  | 330  | 37    | 8.72  | 9.84    | 3  | mit         |              |                   |                   |            |            |         |    |              |             |             |       |             |             |        |          |         |       |       |      |      |      |      |      |      |      |              |

|       |        |                     |             |       |         |    |    |     |    |      |       |       |        |    |              |                          |                  |            |            |          |             |             |             |           |             |             |             |         |         |       |       |      |      |      |      |      |      |         |      |   |
|-------|--------|---------------------|-------------|-------|---------|----|----|-----|----|------|-------|-------|--------|----|--------------|--------------------------|------------------|------------|------------|----------|-------------|-------------|-------------|-----------|-------------|-------------|-------------|---------|---------|-------|-------|------|------|------|------|------|------|---------|------|---|
| FALSE | High   | Master Prq Q94776   | Metastasi   | 0     | 33.57   | 15 | 10 | 11  | 10 | 668  | 75    | 9.66  | 21.41  | 10 | cell organ   | membrane catalytic a     | P100429, F 9219  | ENSG000001 | MTA2       | 11       |             | ERCC5 (CS   | 20          | 1.19      | 0.280974215 | 24.58       | 4239.2      | 3622.8  | 20.05   | 6.66  | High  | High | High | High | High | High | High | 1       |      |   |
| FALSE | High   | Master Prq Q7L86    | FAST kinas  | 0     | 6.145   | 1  | 1  | 2   | 1  | 764  | 86.5  | 8.13  | 4.61   | 1  | cell organ   | mitochond catalytic a    | P06743, F 60493  | ENSG000001 | FASTK205   | 20       |             |             | 0           | 1.19      | 0.609700196 | 45.85       | 477.8       | 485.2   | 32.9    | 15.74 | High  | High | High | High | High | High | High | 1       |      |   |
| FALSE | High   | Master Prq P40926   | Malate de   | 0     | 232.562 | 66 | 19 | 105 | 19 | 338  | 35.5  | 8.68  | 266.39 | 19 | metabolic    | membrane catalytic a     | P00456, F 4191   | ENSG000001 | MDH2       | 7        | Metabolic   | Amino Acid  | Glucosam    | 16        | 1.189       | 0.042947945 | 7.43        | 40239.9 | 34798.2 | 6.72  | 4.11  | High    | 1    |   |
| FALSE | Medium | Master Prq Q14524-1 | Nuclear en  | 0.015 | 1.552   | 2  | 1  | 1   | 1  | 444  | 50.6  | 6.93  | 2.2    | 1  | membrane     |                          | P10225           | 23306      | ENSG000001 | TMEM194  | 12          |             |             | 0         | 1.189       | 0.136219596 | 12.94       | 208.6   | 175.4   | 5.6   | 9.96  | High    | 1    |   |
| FALSE | High   | Master Prq P52306-1 | Rap1 GTPa   | 0     | 9.795   | 2  | 1  | 1   | 1  | 607  | 66.3  | 5.31  | 3.6    | 1  | cell organ   | cytosol/eni enzyme re    | P00514           | 5910       | ENSG000001 | RAP1G0S1 | 4           |             |             | 0         | 1.188       | 0.609987004 | 65.63       | 747.6   | 565.2   | 49.83 | 43.35 | High    | 1    |   |
| FALSE | High   | Master Prq Q75439   | mitochond   | 0     | 81.579  | 41 | 15 | 21  | 14 | 489  | 54.3  | 6.83  | 54.57  | 15 | metabolic    | membrane catalytic a     | P00875, F 9512   | ENSG000001 | PMPC8      | 7        |             |             | 5           | 1.187     | 0.038079303 | 1.04        | 6509.9      | 5516.3  | 4.93    | 1.54  | High  | High | High | High | High | High | High | 1       |      |   |
| FALSE | High   | Master Prq P13937   | UDP-gluc    | 0     | 11.674  | 8  | 1  | 2   | 1  | 396  | 41.3  | 9.96  | 9.85   | 1  | metabolic    | endoplasm protein br     | P04142           | 7355       | ENSG000001 | SLC35A2  | X           | Defective s |             | 8         | 1.187       | 0.597271694 | 96          | 225.4   | 194.8   | 99.79 | 55.27 | High    | 1    |   |
| FALSE | High   | Master Prq Q9BTX1   | Nucleopor   | 0     | 12.165  | 4  | 2  | 4   | 2  | 674  | 76.3  | 9.09  | 12.27  | 2  | cell organ   | cytoplasm; structural    | P09931           | 55706      | ENSG000001 | NDCL1    | TM1         | RNA trans   | Rev-media   | 64        | 1.186       | 0.265072021 | 17.9        | 136.8   | 126.4   | 27.83 | 5.26  | High    | 1    |   |
| FALSE | High   | Master Prq Q8NE22   | Vacuolar p  | 0     | 14.15   | 9  | 2  | 2   | 2  | 397  | 44.3  | 5.57  | 7.65   | 2  | cell comm    | cytosol/eni protein br   | P07200           | 137492     | ENSG000001 | VP537A   | 8           | Endocytosi  | Budding a   | 13        | 1.186       | 0.407256743 | 35.84       | 649.9   | 559.8   | 37.78 | 15.96 | High    | 1    |   |
| FALSE | High   | Master Prq Q9UNH7-1 | Sorting ne  | 0     | 19.319  | 14 | 5  | 5   | 5  | 406  | 46.6  | 6.16  | 6.25   | 5  | cell organ   | cytoplasm; protein br    | P00787, F 58533  |            | ENSG000001 | SNKE     | 14          | Endocytosi  |             | 1         | 1.186       | 0.445397038 | 44.48       | 381.7   | 321.7   | 39.58 | 7.34  | High    | 1    |   |
| FALSE | High   | Master Prq Q9BUR4   | Telomeras   | 0     | 6.158   | 7  | 3  | 3   | 3  | 548  | 59.3  | 4.58  | 4.03   | 3  | cell organ   | cytoplasm; protein br    | P04040           | 55135      | ENSG000001 | WRAP53   | 17          | Association |             | 9         | 1.186       | 0.82324302  | 8.37        | 838.4   | 669.3   | 7.46  | 43.86 | High    | 1    |   |
| FALSE | High   | Master Prq P31937   | 3-hydroxy   | 0     | 64.808  | 35 | 8  | 16  | 8  | 336  | 35.3  | 8.13  | 56.49  | 8  | metabolic    | mitochond catalytic a    | P02254, F 11112  | ENSG000001 | HIBADH     | X        | Valine, leu | Amino Acid  | Branched-<  | 6         | 1.185       | 0.362711507 | 19.08       | 4115.3  | 3562.9  | 16.35 | 3.61  | High    | 1    |   |
| FALSE | High   | Master Prq Q75381-1 | Peroxisom   | 0     | 8.464   | 6  | 2  | 4   | 2  | 377  | 41.2  | 4.94  | 7.42   | 2  | cell organ   | membrane protein br      | P04695           | 5195       | ENSG000001 | PEX14    | 1           | Peroxisom   |             | 1         | 1.185       | 0.413094208 | 37.23       | 878.9   | 837.4   | 36.03 | 10.72 | High    | 1    |   |
| FALSE | High   | Master Prq Q9HCC0-1 | Methylcro   | 0     | 54.168  | 22 | 9  | 11  | 9  | 563  | 61.3  | 7.68  | 36.23  | 9  | cell organ   | cytosol;mi catalytic a   | P101039          | 64087      | ENSG000001 | MCCC2    | 5           | Metabolic   | Branched-<  | 13        | 1.184       | 0.201282518 | 12.82       | 4329.9  | 4004.6  | 23.55 | 7.31  | High    | 1    |   |
| FALSE | High   | Master Prq Q9BW71-1 | HIRA-inter  | 0     | 14.478  | 4  | 2  | 4   | 2  | 556  | 61.9  | 8.54  | 4.15   | 2  | cell organ   | nucleus protein br       | P09649           | 8479       | ENSG000001 | HIRAP3   | 16          |             |             | 0         | 1.183       | 0.356038996 | 31.25       | 174.9   | 152.7   | 14.71 | 12.56 | High    | 1    |   |
| FALSE | High   | Master Prq Q9S155   | Ubiquitin   | 0     | 20.347  | 8  | 8  | 11  | 8  | 1302 | 146.1 | 6.55  | 22.44  | 8  | cell organ   | cytoplasm; catalytic a   | P104564, F 10277 | ENSG000001 | UBE48      | 1        | Protein prc |             | 2           | 1.183     | 0.476338362 | 48.18       | 837.5       | 707.9   | 40.51   | 11.66 | High  | High | High | High | High | High | High | [R654]; |      |   |
| FALSE | Medium | Master Prq Q14814-1 | Myocyte-s   | 0.012 | 1.997   | 2  | 1  | 1   | 1  | 521  | 55.9  | 7.88  | 2.27   | 1  | cell death   | cytoplasm; DNA bindi     | P03015, F 4209   | ENSG000001 | MEF2D      | 1        | cGMP-PKG    | Energy Me   | Transcripti | 16        | 1.182       | 0.16652818  | 7.15        | 477.5   | 391.4   | 10.1  | 12.43 | High    | 1    |   |
| FALSE | High   | Master Prq Q9H788   | SH2 domai   | 0     | 5.079   | 3  | 1  | 2   | 1  | 454  | 52.7  | 8.06  | 8.27   | 1  | regulation   | cytoplasm; protein br    | P00017           | 63898      | ENSG000001 | SH2D4A   | 8           |             |             | 0         | 1.182       | 0.346017245 | 30.25       | 470.9   | 405.9   | 23.38 | 6.28  | High    | 1    |   |
| FALSE | High   | Master Prq Q42765   | 3-ketocya   | 0     | 177.396 | 89 | 25 | 51  | 25 | 397  | 41.9  | 8.09  | 133.13 | 25 | cell organ   | membrane catalytic a     | P100308, F 10449 | ENSG000001 | ACAA2      | 18       | Fatty acid  | Fatty Acid  | Mitochond   | 10        | 1.182       | 0.628661412 | 26.75       | 16446.2 | 13911.3 | 17.74 | 11.47 | High    | 1    |   |
| FALSE | High   | Master Prq P136352  | alpha-int   | 0     | 45.887  | 27 | 12 | 16  | 10 | 499  | 55.4  | 5.4   | 32.06  | 12 | cell differe | cytoskelet structural    | P100338, F 9118  | ENSG000001 | INA        | 10       |             |             | 0           | 1.181     | 0.437933629 | 18.68       | 2160.9      | 1988.8  | 12.76   | 14.97 | High  | High | High | High | High | High | High | 1       |      |   |
| FALSE | High   | Master Prq Q75607   | Nucleoplai  | 0     | 9.095   | 16 | 2  | 2   | 2  | 178  | 19.3  | 4.63  | 3.71   | 2  | metabolic    | cytoskelet protein br    | P102087, F 10360 | ENSG000001 | NPM3       | 10       |             |             | 0           | 1.18      | 0.255822915 | 4.98        | 228.3       | 195.5   | 6.72    | 5.85  | High  | High | High | High | High | High | High | 1       |      |   |
| FALSE | High   | Master Prq P62745   | Rho-relate  | 0     | 5.769   | 18 | 2  | 2   | 2  | 196  | 22.1  | 5.24  | 2.85   | 2  | cell death   | cytosol/eni catalytic a  | P100255, F 388   | ENSG000001 | RHO28      | X        | Androgen    | G alpha (L  | 24          | 1.18      | 0.283683833 | 3.68        | 619.2       | 507.1   | 36.97   | 9.47  | High  | High | High | High | High | High | High | 1       |      |   |
| FALSE | High   | Master Prq Q97978   | Acetate     | 0     | 90.659  | 31 | 15 | 26  | 15 | 780  | 85.4  | 7.61  | 69.5   | 15 | metabolic    | mitochond catalytic a    | P100330, F 50    | ENSG000001 | AC02       | 22       | Citrate cyc | Amino Acid  | Mitochond   | 14        | 1.178       | 0.382638178 | 27.78       | 4258.8  | 3256.9  | 45.61 | 19.86 | High    | 1    |   |
| FALSE | High   | Master Prq P10101   | Protein dis | 0     | 271.594 | 72 | 36 | 124 | 36 | 505  | 56.7  | 6.35  | 327.68 | 36 | cellular ho  | cell surface catalytic a | P100085, F 2923  | ENSG000001 | PD1A3      | 15       | Antigen pr  | ER-Phagoc   | 13          | 1.179     | 0.137046007 | 5.25        | 42728.8     | 36236.4 | 6.92    | 2.2   | High  | High | High | High | High | High | High | 1       |      |   |
| FALSE | High   | Master Prq P08648   | Integrin al | 0     | 15.142  | 3  | 2  | 4   | 2  | 1049 | 114.5 | 5.77  | 9.45   | 2  | cell differe | cell surface metal ion   | P101839, F 3678  | ENSG000001 | ITGA5      | 12       | Dilated car | Integrin-m  | RUNX2 reg   | 33        | 1.179       | 0.275852897 | 16.47       | 922.3   | 766     | 26.98 | 11.23 | High    | 1    |   |
| FALSE | High   | Master Prq P06748   | Nucleopho   | 0     | 243.63  | 55 | 23 | 206 | 6  | 294  | 32.6  | 4.78  | 513.44 | 23 | cell growth  | cytoplasm; DNA bindi     | P03066           | 4869       | ENSG000001 | NPM1     | 5           | Nuclear in  |             | 18        | 1.178       | 0.410790968 | 17.77       | 11892.8 | 10407.1 | 5.33  | 8.85  | High    | 1    |   |
| FALSE | High   | Master Prq Q92779-1 | Symplekin   | 0     | 8.315   | 3  | 2  | 2   | 2  | 1274 | 141.1 | 6.19  | 33.1   | 2  | metabolic    | cytoplasm; protein br    | PF11935, F 8189  | ENSG000001 | SYMPK      | 19       | Tight junct |             | 16          | 1.178     | 0.361419141 | 30.19       | 366.9       | 311.5   | 26.1    | 9.21  | High  | High | High | High | High | High | High | 1       |      |   |
| FALSE | High   | Master Prq Q75348   | V-type pro  | 0     | 16.06   | 21 | 3  | 5   | 3  | 118  | 13.7  | 8.79  | 12.51  | 3  | cellular ho  | cytosol;me catalytic a   | P101179          | 9550       | ENSG000001 | ATPEV1G1 | 9           | Vibrio chol | Osteoclast  | Transferr | 21          | 1.178       | 0.468139235 | 45.03   | 1067.9  | 970.7 | 40.28 | 8.71 | High | High | High | High | High | High    | High | 1 |
| FALSE | High   | Master Prq P20962   | Parathym    | 0     | 16.079  | 28 | 4  | 6   | 4  | 102  | 11.5  | 4.16  | 9      | 4  | metabolic    | nucleus                  | 5763             |            | ENSG000001 | PTMS     | 12          |             |             | 0         | 1.177       | 0.011368586 | 2.17        | 1377.1  | 1169.6  | 4.71  | 8.34  | High    | 1    |   |
| FALSE | High   | Master Prq P20962   | Parathym    | 0     | 16.079  | 28 | 4  | 6   | 4  | 102  | 11.5  | 4.16  | 9      | 4  | metabolic    | nucleus                  | 5763             |            | ENSG000001 | PTMS     | 12          |             |             | 0         | 1.177       | 0.011368586 | 2.17        | 1377.1  | 1169.6  | 4.71  | 8.34  | High    | 1    |   |
| FALSE | High   | Master Prq Q9H788   | SH2 domai   | 0     | 5.079   | 3  | 1  | 2   | 1  | 454  | 52.7  | 8.06  | 8.27   | 1  | regulation   | cytoplasm; protein br    | P00017           | 63898      | ENSG000001 | SH2D4A   | 8           | Complexe    | Regulation  | 17        | 1.177       | 0.066409941 | 9.47        | 4635.2  | 3639.8  | 9.14  | 5.12  | High    | 1    |   |
| FALSE | High   | Master Prq Q16629   | serine/argi | 0     | 46.799  | 33 | 8  | 21  | 8  | 238  | 27.7  | 11.82 | 38.72  | 8  | metabolic    | cytoplasm; metal ion     | P10076, F 6432   | ENSG000001 | SRSF7      | 2        | Spliceosom  | mRNA Pro    | Cleavage o  | 15        | 1.177       | 0.16231505  | 0.71        | 6086.3  | 5910.7  | 8.57  | 7.75  | High    | 1    |   |
| FALSE | High   | Master Prq Q9N263   | Telomere i  | 0     | 6.031   | 8  | 2  | 2   | 2  | 289  | 33.4  | 4.74  | 3.3    | 2  | cytosol      | protein br               | P107052          | 51759      | ENSG000001 | C1orf78  | 9           |             |             | 0         | 1.177       | 0.31728763  | 27.83       | 629     | 546     | 15.35 | 8.92  | High    | 1    |   |
| FALSE | High   | Master Prq P28482   | mitogen-a   | 0     | 13.447  | 9  | 2  | 3   | 2  | 360  | 41.4  | 6.98  | 5.7    | 2  | cell comm    | cytoplasm; catalytic a   | P100669, F 5594  | ENSG000001 | MAPK1      | 32       | MicroRNA    | IL-5 Signa  | phospho-p   | 290       | 1.177       | 0.3500778   | 32.65       | 219.3   | 179.4   | 16.29 | 13.23 | High    | 1    |   |
| FALSE | High   | Master Prq Q15234   | Protein CA  | 0     | 10.677  | 5  | 2  | 2   | 2  | 703  | 76.2  | 6.48  | 4.17   | 2  | metabolic    | cytoplasm; protein br    | P109405          | 22794      | ENSG000001 | MDM2     | 17          | RNA trans   | mRNA 3'-e   | 19        | 1.176       | 0.425864793 | 37.99       | 393.7   | 329.6   | 57.05 | 19.03 | High    | 1    |   |
| FALSE | High   | Master Prq Q9NF37   | Lysophosp   | 0     | 22.828  | 12 | 5  | 13  | 5  | 534  | 59.1  | 6.02  | 29.12  | 5  | metabolic    | endoplasm catalytic a    | P101553, F 79888 | ENSG000001 | LCPIA1     | 1        | Ether lipid | Synthesis c | 14          | 1.175     | 0.091045611 | 0.04        | 1349.3      | 1171.7  | 6.21    | 1.28  | High  | High | High | High | High | High | High | 1       |      |   |
| FALSE | High   | Master Prq Q9UPQ0-1 | LM and ca   | 0     | 5.754   | 3  | 3  | 3   | 3  | 1083 | 121.8 | 6.47  | 2.67   | 3  | cellular ho  | metal ion                | P100307, F 22998 | ENSG000001 | UPC11      | 4        |             |             | 0           | 1.175     | 0.307418539 | 27.09       | 645.7       | 549.4   | 10.97   | 11.12 | High  | High | High | High | High | High | High | 1       |      |   |
| FALSE | High   | Master Prq P30084   | Enoyl-CoA   | 0     | 150.1   | 62 | 17 | 56  | 17 | 290  | 31.4  | 8.    |        |    |              |                          |                  |            |            |          |             |             |             |           |             |             |             |         |         |       |       |      |      |      |      |      |      |         |      |   |

|       |        |            |          |             |       |         |    |    |    |    |      |       |       |        |    |               |               |            |    |                  |            |          |    |  |  |              |    |         |             |       |         |         |       |       |      |      |      |      |      |      |   |
|-------|--------|------------|----------|-------------|-------|---------|----|----|----|----|------|-------|-------|--------|----|---------------|---------------|------------|----|------------------|------------|----------|----|--|--|--------------|----|---------|-------------|-------|---------|---------|-------|-------|------|------|------|------|------|------|---|
| FALSE | High   | Master Prq | P48729-3 | Isomorf 3   | 0     | 12.887  | 14 | 3  | 6  | 1  | 325  | 37.5  | 9.48  | 18.83  | 3  | cell division | cytosol;mel   | catalytic  | ac | P00069, F 1452   | ENSG000001 | CNCK1A1  | 5  |  |  | T-Cell Recd  | 4  | 1.162   | 0.461629863 | 37.01 | 187.7   | 161.6   | 18.99 | 19.52 | High | High | High | High | High | High | 1 |
| FALSE | Medium | Master Prq | Q60313   | Dynamilin-1 | 0.031 | 1.427   | 1  | 1  | 1  | 1  | 960  | 111.6 | 7.87  | 0      | 1  | cell death    | cytosol;mel   | catalytic  | ac | P00350, F 4976   | ENSG000001 | OPA1     | 3  |  |  | Regulation   | 3  | 1.162   | 0.475078141 | 18.04 | 575.2   | 555.5   | 14.54 | 14.23 | High | High | High | High | High | High | 1 |
| FALSE | High   | Master Prq | Q10713   | Mitochondr  | 0     | 50.616  | 27 | 10 | 16 | 10 | 525  | 58.2  | 6.92  | 40.71  | 10 | metabolic     | membrane      | catalytic  | ac | P00075, F 23203  | ENSG000001 | PMPCA    | 9  |  |  | Processing   | 5  | 1.161   | 0.038850818 | 1.06  | 3226.6  | 2758.5  | 2.52  | 7.16  | High | High | High | High | High | High | 1 |
| FALSE | High   | Master Prq | Q95302   | Peptidyl-pi | 0     | 19.021  | 10 | 5  | 10 | 5  | 570  | 63    | 5.08  | 17.32  | 1  | metabolic     | cytoplasm;    | catalytic  | ac | P00054, F 11328  | ENSG000001 | KFBP9    | 9  |  |  | Associatio   | 4  | 1.16    | 0.069373663 | 2.74  | 3739.5  | 3417.8  | 5.27  | 3.6   | High | High | High | High | High | High | 1 |
| FALSE | High   | Master Prq | Q9NVT1   | Protein SD  | 0     | 8.826   | 1  | 1  | 2  | 1  | 687  | 79.8  | 9.25  | 4.91   | 1  | cell organ    | nucleus       |            |    | P05825, F 55153  | ENSG000001 | SOD01    | 4  |  |  |              | 0  | 1.16    | 0.184495811 | 15.35 | 786.5   | 678     | 6.55  | 11.42 | High | High | High | High | High | High | 1 |
| FALSE | High   | Master Prq | Q16543   | Hsp90 co-c  | 0     | 49.103  | 36 | 11 | 15 | 11 | 378  | 44.4  | 5.25  | 31.27  | 11 | cell division | cytoplasm;    | catalytic  | ac | P00334, F 11140  | ENSG000001 | CD37     | 19 |  |  | P3K-Akt si   | 17 | 1.16    | 0.364580773 | 25.37 | 2422.3  | 2363.6  | 14.86 | 9.99  | High | High | High | High | High | High | 1 |
| FALSE | High   | Master Prq | Q05155   | BET1 norm   | 0     | 11.537  | 25 | 2  | 4  | 2  | 118  | 13.3  | 9.06  | 18.03  | 2  | cell organ    | endoplasm     | protein bi | re | P05739, F 10282  | ENSG000001 | BET1     | 10 |  |  | SNARE int    | 10 | 1.159   | 0.108007812 | 2.14  | 2596.3  | 2197.7  | 9.75  | 3.02  | High | High | High | High | High | High | 1 |
| FALSE | High   | Master Prq | P09110-1 | 3-ketocacyl | 0     | 9.757   | 8  | 2  | 2  | 2  | 424  | 44.3  | 8.44  | 3.95   | 2  | metabolic     | extracellular | catalytic  | ac | P00108, F 30     | ENSG000001 | ACA1     | 3  |  |  | Metabolic    | 21 | 1.159   | 0.185599584 | 16.36 | 268.3   | 259.3   | 16.6  | 8.47  | High | High | High | High | High | High | 1 |
| FALSE | High   | Master Prq | Q16778   | Histone H2  | 0     | 108.838 | 75 | 15 | 93 | 3  | 126  | 13.9  | 10.32 | 246.61 | 15 | cell organ    | chromoso      | DNA bindi  | re | P00125, F 8349   | ENSG000001 | HIST2H2B | 1  |  |  | Systemic li  | 75 | 1.159   | 0.273730141 | 23.34 | 4805.4  | 3988.7  | 28.33 | 13.54 | High | High | High | High | High | High | 1 |
| FALSE | High   | Master Prq | P19013   | Keratin, ty | 0     | 22.171  | 9  | 5  | 21 | 1  | 534  | 57.3  | 6.61  | 36.48  | 5  | cell death    | cell surface  | protein bi | re | P00038, F 3851   | ENSG000001 | KRT4     | 12 |  |  | Formation    | 3  | 1.159   | 0.611263343 | 19.51 | 780.3   | 673.4   | 12.75 | 10.73 | High | High | High | High | High | High | 1 |
| FALSE | High   | Master Prq | P00414   | Cytochrome  | 0     | 5.001   | 5  | 1  | 2  | 1  | 261  | 29.9  | 7.31  | 6.4    | 1  | cell organ    | membrane      | catalytic  | ac | P00510, F 4514   | ENSG000001 | CDX3     | MT |  |  | Non-alcohol  | 17 | 1.157   | 0.142181138 | 9.03  | 1218.4  | 965.9   | 12.85 | 18.46 | High | High | High | High | High | High | 1 |
| FALSE | High   | Master Prq | Q95854   | Homocyste   | 0.001 | 4.535   | 2  | 1  | 2  | 1  | 406  | 45.1  | 5.06  | 4.26   | 1  | response i    | membrane      | protein bi | re | P00240, F 64224  | ENSG000001 | HERPUD2  | 7  |  |  |              | 0  | 1.157   | 0.257911233 | 20.52 | 1165.2  | 1041.4  | 13.06 | 7.62  | High | High | High | High | High | High | 1 |
| FALSE | High   | Master Prq | Q56199   | Integrin al | 0     | 21.449  | 5  | 5  | 7  | 5  | 1179 | 130.8 | 6.29  | 12.64  | 5  | cell organ    | cell surface  | metal ion  | re | P00092, F 3672   | ENSG000001 | ITGA1    | 5  |  |  | P3K-Akt si   | 27 | 1.157   | 0.652271323 | 6.25  | 1038.3  | 997.2   | 9.19  | 15.78 | High | High | High | High | High | High | 1 |
| FALSE | High   | Master Prq | P11310-1 | medium-cl   | 0     | 64.513  | 37 | 12 | 17 | 12 | 421  | 46.6  | 8.37  | 34.14  | 12 | metabolic     | membrane      | catalytic  | ac | P00441, F 34     | ENSG000001 | ACADM    | 1  |  |  | PPAR sign    | 24 | 1.156   | 0.038815144 | 5.35  | 2816.9  | 2496.1  | 5.69  | 5.39  | High | High | High | High | High | High | 1 |
| FALSE | High   | Master Prq | Q96ER9   | Coiled-coil | 0     | 12.151  | 8  | 2  | 3  | 2  | 411  | 45.8  | 8.19  | 7.49   | 2  | membrane      |               |            |    | 79714            | ENSG000001 | CCDC51   | 3  |  |  |              | 0  | 1.156   | 0.264174948 | 5.53  | 784.4   | 672.3   | 2.63  | 11.17 | High | High | High | High | High | High | 1 |
| FALSE | High   | Master Prq | Q9UGI8   | Testin [OS  | 0     | 10.424  | 10 | 4  | 5  | 4  | 421  | 48    | 7.68  | 6.1    | 4  | regulation    | cytoplasm;    | metal ion  | re | P00412, F 26136  | ENSG000001 | TES      | 7  |  |  |              | 0  | 1.156   | 0.369090955 | 27.14 | 769.5   | 665.5   | 20.16 | 19.88 | High | High | High | High | High | High | 1 |
| FALSE | High   | Master Prq | Q43304   | Glycerol-3  | 0     | 5.373   | 4  | 3  | 5  | 3  | 727  | 80.8  | 7.69  | 3.97   | 3  | metabolic     | membrane      | catalytic  | ac | P00036, F 2820   | ENSG000001 | GPD2     | 2  |  |  | Glyceroph    | 9  | 1.156   | 0.38985886  | 25.38 | 800.8   | 732.7   | 33.02 | 15.12 | High | High | High | High | High | High | 1 |
| FALSE | High   | Master Prq | Q95391   | Pre-mRNA    | 0     | 20.105  | 11 | 6  | 8  | 6  | 586  | 68.3  | 7.14  | 9.78   | 6  | cell organ    | cytoplasm;    | catalytic  | ac | P11708, F 10569  | ENSG000001 | SU17     | 5  |  |  | Spliceosom   | 12 | 1.156   | 0.485375652 | 37.91 | 300.6   | 286.6   | 24.37 | 12.1  | High | High | High | High | High | High | 1 |
| FALSE | High   | Master Prq | Q43674-1 | NADH dehyd  | 0     | 9.736   | 15 | 2  | 2  | 2  | 189  | 21.7  | 9.63  | 8.17   | 2  | cell organ    | membrane      | catalytic  | ac | P00971, F 4711   | ENSG000001 | NDUFBS   | 3  |  |  | Huntington   | 13 | 1.156   | 0.77756523  | 19.55 | 1070.7  | 926.3   | 14.43 | 13.21 | High | High | High | High | High | High | 1 |
| FALSE | High   | Master Prq | Q9U42-1  | Carboxype   | 0     | 16.626  | 5  | 1  | 3  | 1  | 421  | 47.3  | 6.7   | 14.1   | 1  | cell organ    | extracellular | catalytic  | ac | P00246, F 51200  | ENSG000001 | CPA4     | 7  |  |  |              | 0  | 1.155   | 0.558853845 | 25.93 | 830.2   | 795.4   | 21.7  | 8.21  | High | High | High | High | High | High | 1 |
| FALSE | High   | Master Prq | Q96G46   | tRNA-dihy   | 0     | 4.687   | 3  | 1  | 1  | 1  | 650  | 72.5  | 8.05  | 4.05   | 1  | metabolic     |               | catalytic  | ac | P01207, F 56931  | ENSG000001 | DUSL3    | 9  |  |  |              | 0  | 1.155   | 0.596346582 | 52.08 | 143.2   | 138.2   | 35.72 | 16.17 | High | High | High | High | High | High | 1 |
| FALSE | High   | Master Prq | Q9YSY2   | Cytosolic f | 0     | 14.984  | 19 | 2  | 3  | 2  | 271  | 28.8  | 5.83  | 12.41  | 2  | cell organ    | cytoplasm;    | metal ion  | re | P00142, F 10101  | ENSG000001 | NUPB2    | 16 |  |  | Cytosolic li | 2  | 1.155   | 0.71815539  | 42.41 | 282     | 36.4    | 57.96 | 36.6  | High | High | High | High | High | High | 1 |
| FALSE | High   | Master Prq | Q9Y2W1   | Thyroid hor | 0     | 102.986 | 23 | 20 | 45 | 20 | 955  | 108.6 | 10.15 | 96.79  | 20 | metabolic     | nucleus       | DNA bindi  | re | P15440, F 9967   | ENSG000001 | THRAP3   | 3  |  |  | Interactor   | 7  | 1.154   | 0.059774675 | 6.82  | 18923.1 | 16393.4 | 9.82  | 4.74  | High | High | High | High | High | High | 1 |
| FALSE | High   | Master Prq | P54725-1 | UV excision | 0     | 14.618  | 13 | 3  | 6  | 2  | 363  | 39.6  | 4.58  | 10.99  | 3  | metabolic     | cytoplasm;    | DNA bindi  | re | P00240, F 5886   | ENSG000001 | NDAI3A   | 19 |  |  | Nucleotide   | 11 | 1.154   | 0.255127776 | 18.26 | 588.8   | 498.3   | 8.78  | 13.89 | High | High | High | High | High | High | 1 |
| FALSE | High   | Master Prq | Q15230   | Laminin su  | 0     | 29.047  | 3  | 7  | 9  | 7  | 3695 | 399.5 | 7.02  | 16.17  | 7  | cell differe  | extracellular | catalytic  | ac | P00052, F 3911   | ENSG000001 | LAMAS    | 20 |  |  | Toxoplasma   | 27 | 1.154   | 0.367820838 | 28.56 | 2358.9  | 2255.9  | 24.84 | 6.7   | High | High | High | High | High | High | 1 |
| FALSE | High   | Master Prq | Q9NFQ8   | Torsin-1A   | 0     | 9.216   | 6  | 3  | 3  | 3  | 470  | 51.2  | 4.66  | 6.7    | 3  | cell organ    | endoplasm     | enzyme re  | re | P05069, F 163590 | ENSG000001 | TOR1AIP2 | 1  |  |  |              | 0  | 1.154   | 0.43123173  | 32.08 | 642.6   | 492.8   | 21.75 | 22.66 | High | High | High | High | High | High | 1 |
| FALSE | High   | Master Prq | Q9UM00   | Calcium ion | 0     | 25.733  | 21 | 4  | 9  | 4  | 188  | 21.2  | 9.74  | 27.44  | 4  | cellular hor  | endoplasm     | transporte | re | P01956, F 54499  | ENSG000001 | TMC01    | 1  |  |  |              | 0  | 1.154   | 0.483998648 | 35.51 | 2537.7  | 2318.1  | 17.43 | 12.67 | High | High | High | High | High | High | 1 |
| FALSE | High   | Master Prq | Q92905   | COP9 sign   | 0     | 7.085   | 6  | 1  | 1  | 1  | 334  | 37.6  | 6.54  | 4.92   | 1  | cell organ    | chromoso      | catalytic  | ac | P01398, F 10987  | ENSG000001 | COP9     | 8  |  |  | TGF-beta S   | 14 | 1.154   | 0.683149423 | 27.82 | 369.3   | 317.3   | 25.67 | 4.89  | High | High | High | High | High | High | 1 |
| FALSE | Low    | Master Prq | Q9BGQ2   | Olfactory r | 0.057 | 1.136   | 2  | 1  | 1  | 1  | 313  | 35.4  | 7.97  | 0      | 1  | regulation    | membrane      | receptor r | re | P00001, F 26686  | ENSG000001 | OR4E2    | 14 |  |  | Olfactory s  | 4  | 1.154   | 0.758196393 | 28.53 | 84.6    | 73.3    | 12.24 | 20.05 | High | High | High | High | High | High | 1 |
| FALSE | High   | Master Prq | P99687   | Acidic leuc | 0     | 42.35   | 29 | 8  | 17 | 6  | 249  | 28.6  | 4.09  | 37.53  | 8  | cell organ    | cytoplasm;    | protein bi | re | P11279, F 8125   | ENSG000001 | ANP32A   | 15 |  |  | HuR [ELAV    | 3  | 1.153   | 0.041936887 | 3.07  | 1512.3  | 1285.1  | 2.55  | 6.37  | High | High | High | High | High | High | 1 |
| FALSE | High   | Master Prq | Q9BTL3   | RNMT-acti   | 0     | 9.465   | 19 | 1  | 2  | 1  | 118  | 14.4  | 8.94  | 9.02   | 1  | cell organ    | nucleus       | catalytic  | ac | P15320, F 83640  | ENSG000001 | FAM103A  | 15 |  |  |              | 0  | 1.153   | 0.065575055 | 3.65  | 111.5   | 94      | 13.24 | 8.84  | High | High | High | High | High | High | 1 |
| FALSE | High   | Master Prq | Q968N8   | Ubiquitin t | 0     | 25.845  | 24 | 5  | 5  | 5  | 352  | 40.2  | 4.57  | 12.79  | 5  | defense re    | cytoplasm;    | catalytic  | ac | P101275, F 90268 | ENSG000001 | FAM105B  | 5  |  |  | Regulation   | 8  | 1.153   | 0.158752307 | 11.54 | 1637.8  | 1538.9  | 10.62 | 4.69  | High | High | High | High | High | High | 1 |
| FALSE | High   | Master Prq | Q75380   | NADH dehyd  | 0     | 31.079  | 48 | 4  | 8  | 4  | 124  | 13.7  | 8.28  | 29.53  | 4  | cell organ    | membrane      | catalytic  | ac | P10276, F 4726   | ENSG000001 | NDUF56   | 5  |  |  | Metabolic    | 13 | 1.153   | 0.458883992 | 3.12  | 1069    | 934.6   | 13.63 | 0.53  | High | High | High | High | High | High | 1 |
| FALSE | High   | Master Prq | Q86B11   | Elongator   | 0.002 | 3.818   | 2  | 1  | 1  | 1  | 424  | 46.6  | 8.51  | 2.91   | 1  | cell organ    | cytoplasm;    | catalytic  | ac | P005425, F 26610 | ENSG000001 | ELP4     | 11 |  |  | Mesoderm     | 4  | 1.153   | 0.480092937 | 41.56 | 462.2   | 477.7   | 42.46 | 12.84 | High | High | High | High | High | High | 1 |
| FALSE | Low    | Master Prq | Q9UWPR   | Suprabasin  | 0.069 | 1.052   | 4  | 1  | 1  | 1  | 590  | 60.5  | 7.01  | 0      | 1  | extracellular |               |            |    | 374897           | ENSG000001 | SBSN     | 9  |  |  |              | 0  | 1.153   | 0.863093962 | 65.08 | 280.4   | 243.1   | 27.38 | 22.76 | High | High | High | High | High | High | 1 |
| FALSE | High   | Master Prq | Q9BNP9-1 | Sulfatase-r | 0     | 28.325  | 23 | 5  | 10 | 5  | 301  | 33.8  | 8     | 29.6   | 5  | metabolic     | endoplasm     | metal ion  | re | P013871, F 25870 | ENSG000001 | SUMF2    | 17 |  |  | The activat  | 8  | 1.152   | 0.01088111  | 4.3   | 2163.9  | 1878.9  | 1.29  | 4.17  | High | High | High | High | High | High | 1 |
| FALSE | High   | Master Prq | Q13322   | Nucleoside  | 0     | 7.209   | 17 | 2  | 2  | 2  | 169  | 19    | 7.84  | 7.73   | 2  | cell death    | cytosol;mel   | catalytic  | ac | P00334, F 4832   | ENSG000001 | NME3     | 16 |  |  | Intercom     | 6  | 1.152</ |             |       |         |         |       |       |      |      |      |      |      |      |   |



|       |        |                      |              |       |         |    |    |    |    |      |       |       |        |    |              |                           |                   |                     |           |             |                         |           |    |       |             |       |         |        |        |       |      |      |      |      |      |      |   |
|-------|--------|----------------------|--------------|-------|---------|----|----|----|----|------|-------|-------|--------|----|--------------|---------------------------|-------------------|---------------------|-----------|-------------|-------------------------|-----------|----|-------|-------------|-------|---------|--------|--------|-------|------|------|------|------|------|------|---|
| FALSE | High   | Master Prq C9JUX7    | Nuclear pc   | 0     | 28.637  | 26 | 6  | 6  | 6  | 468  | 50.1  | 7.06  | 16.9   | 6  | cell organ   | membrane protein br       | P00638, F 10762   | ENSG000001NUP50     | 22        | RNA trans   |                         | Rev-media | 64 | 1.144 | 0.010513968 | 3.21  | 1377.7  | 1204   | 1.12   | 3.79  | High | High | High | High | High | High | 1 |
| FALSE | Medium | Master Prq C75368    | SH3 domain   | 0.011 | 2.039   | 6  | 1  | 2  | 1  | 114  | 12.8  | 5.25  | 2.41   | 1  | cellular ho  | cytoplasm; catalytic ac   | P04602, F 6451    | ENSG000001SH3BGR_L  | X         |             |                         |           | 0  | 1.144 | 0.221077805 | 11.39 | 1251.7  | 1087.2 | 2.63   | 9.61  | High | High | High | High | High | High | 1 |
| FALSE | High   | Master Prq C9B107    | methylethio  | 0     | 24.053  | 6  | 6  | 9  | 6  | 369  | 39.1  | 6.3   | 15.22  | 6  | metabolic    | cytoplasm; catalytic ac   | P04708, F 84245   | ENSG000001MBR11     | 19        | Cysteine ac | Methionin               |           | 0  | 1.144 | 0.476248931 | 6.99  | 2102.8  | 1891.3 | 7.32   | 8.36  | High | High | High | High | High | High | 1 |
| FALSE | High   | Master Prq P0DM98    | Cancer/Inte  | 0     | 5.189   | 14 | 2  | 2  | 2  | 189  | 21.1  | 9.55  | 4.63   | 2  |              |                           | P15300, 10272363  | ENSG000001LOC10272  | X         |             |                         |           | 0  | 1.144 | 0.479371861 | 67.09 | 308.3   | 269.6  | 100.01 | 26    | High | High | High | High | High | High | 1 |
| FALSE | High   | Master Prq C9Y9V8    | SEC23-inter  | 0     | 13.186  | 5  | 4  | 4  | 4  | 1000 | 111   | 5.54  | 8.02   | 4  | cell organ   | cytoplasm; catalytic ac   | P00536, F 11196   | ENSG000001SEC23IP   | 10        |             |                         |           | 8  | 1.144 | 0.575400976 | 13.76 | 55.7    | 53.2   | 13.43  | 9.96  | High | High | High | High | High | High | 1 |
| FALSE | High   | Master Prq C94UQ4    | Transmem     | 0     | 9.655   | 5  | 3  | 4  | 3  | 689  | 77.1  | 9.14  | 7.12   | 3  | cell death   | cytosol; en               | P10151, 54867     | ENSG000001TMEM214   | 2         |             |                         |           | 0  | 1.144 | 0.5989603   | 35.54 | 110.1   | 86.8   | 34.67  | 9.96  | High | High | High | High | High | High | 1 |
| FALSE | High   | Master Prq C99T47    | Gamma-se     | 0     | 7.688   | 6  | 2  | 2  | 2  | 312  | 34.7  | 5.41  | 2.9    | 2  | cell organ   | membrane protein br       | P14938, 8774      | ENSG000001NAPG      | 18        |             |                         |           | 14 | 1.143 | 0.317982199 | 21.51 | 1001.8  | 771.3  | 8.8    | 21.77 | High | High | High | High | High | High | 1 |
| FALSE | High   | Master Prq P46937    | Transcripti  | 0     | 83.022  | 51 | 12 | 20 | 12 | 504  | 54.4  | 5.17  | 75.18  | 12 | cell organ   | cytoplasm; DNA bindi      | P00397, 10413     | ENSG000001YAP1      | 11        | Hippo sign  | Mesoderm RUNX2 reg      |           | 26 | 1.143 | 0.365434927 | 24.15 | 3041.1  | 2719.7 | 32.52  | 4.45  | High | High | High | High | High | High | 1 |
| FALSE | High   | Master Prq P50895    | Basal cell c | 0     | 14.239  | 5  | 2  | 3  | 2  | 628  | 67.4  | 5.81  | 9.04   | 2  | regulation   | cell surface protein br   | P00047, F 4059    | ENSG000001SCAM      | 19        |             |                         |           | 0  | 1.142 | 0.164897132 | 0.78  | 416.5   | 396.5  | 9.46   | 7.05  | High | High | High | High | High | High | 1 |
| FALSE | High   | Master Prq C9BUU7    | MAPK reg     | 0     | 12.237  | 23 | 2  | 2  | 2  | 160  | 17.8  | 9.41  | 6.76   | 2  | cytoplasm;   | protein br                | P14799, 84331     | ENSG000001FAM159A   | 16        |             |                         |           | 0  | 1.142 | 0.196153811 | 14.63 | 992.9   | 863.8  | 8.72   | 6.48  | High | High | High | High | High | High | 1 |
| FALSE | High   | Master Prq C12849    | G-rich seq   | 0     | 25.285  | 14 | 5  | 7  | 5  | 480  | 53.1  | 6.19  | 17.01  | 5  | metabolic    | cytoplasm; RNA bindi      | P00076, F 2926    | ENSG000001GRSF1     | 4         |             |                         |           | 6  | 1.142 | 0.387704203 | 21.47 | 521.2   | 488.4  | 57.57  | 8.1   | High | High | High | High | High | High | 1 |
| FALSE | High   | Master Prq C9P015    | 39S riboso   | 0     | 7.911   | 9  | 2  | 3  | 2  | 296  | 33.4  | 10.01 | 7.14   | 2  | cell organ   | membrane protein br       | P00828, 29088     | ENSG000001MRPL15    | 8         |             |                         |           | 7  | 1.142 | 0.392877577 | 23.99 | 2602.8  | 2189   | 4.92   | 21.57 | High | High | High | High | High | High | 1 |
| FALSE | High   | Master Prq C9JUL25   | Ras-relate   | 0     | 46.623  | 33 | 8  | 13 | 8  | 225  | 24.3  | 7.94  | 35.42  | 8  | cellular co  | cytosol; en; catalytic ac | P00025, F 23011   | ENSG000001RAB21     | 12        |             |                         |           | 7  | 1.142 | 0.445730895 | 1.97  | 4684.7  | 4100.5 | 8.94   | 3.54  | High | High | High | High | High | High | 1 |
| FALSE | High   | Master Prq P47985    | cytochrom    | 0     | 26.831  | 40 | 6  | 7  | 6  | 274  | 29.6  | 8.32  | 24.34  | 6  | metabolic    | membrane catalytic ac     | P00355, F 7386    | ENSG000001UQCRF51   | 19        | Non-alcoh   | Electron Tr Respirator  |           | 12 | 1.141 | 0.028130735 | 4.16  | 712.8   | 643    | 5.77   | 3.64  | High | High | High | High | High | High | 1 |
| FALSE | High   | Master Prq C96MU7    | YTH domai    | 0     | 6.842   | 2  | 1  | 2  | 1  | 727  | 84.6  | 6.23  | 2.16   | 1  | cell organ   | membrane protein br       | P04146, 91746     | ENSG000001YTHDC1    | 4, CHR_HS |             |                         |           | 0  | 1.141 | 0.305111629 | 20.38 | 283.5   | 248.4  | 18.1   | 5.26  | High | High | High | High | High | High | 1 |
| FALSE | High   | Master Prq C96MU7    | NADH deH     | 0     | 14.645  | 21 | 3  | 8  | 3  | 179  | 21.8  | 8.38  | 25.8   | 4  | cell organ   | membrane catalytic ac     | P05347, F 4715    | ENSG000001NDFB9     | 18        | Oxidative e | Electron Tr Complex I   |           | 13 | 1.141 | 0.408796928 | 27.53 | 1989.1  | 1746   | 64.07  | 10.44 | High | High | High | High | High | High | 1 |
| FALSE | High   | Master Prq P62857    | 40S riboso   | 0     | 20.761  | 52 | 4  | 10 | 4  | 69   | 7.8   | 10.7  | 10.52  | 4  | cell organ   | cytosol;rib               | P01200, 6234      | ENSG000001RPS28     | 19        | Ribosome    | Cytoplasm; Peptide ch   |           | 38 | 1.141 | 0.696075754 | 57.69 | 684.6   | 599.8  | 21.66  | 25.81 | High | High | High | High | High | High | 1 |
| FALSE | High   | Master Prq C91005    | Signal pep   | 0     | 14.348  | 22 | 3  | 5  | 3  | 226  | 25    | 8.47  | 10.1   | 3  | metabolic    | endoplasm catalytic ac    | P06703, 9789      | ENSG000001SPCS2     | 11        | Protein ex  | Synthesis               |           | 9  | 1.14  | 0.011858845 | 2.32  | 872.5   | 786.5  | 5.69   | 5.39  | High | High | High | High | High | High | 1 |
| FALSE | High   | Master Prq C9BD01    | EH domain    | 0.001 | 4.474   | 1  | 2  | 3  | 1  | 1231 | 139.9 | 5.35  | 0      | 2  | transport    | cytoplasm; protein br     | P00307, F 23301   | ENSG000001EHPA1     | 10        |             |                         |           | 0  | 1.14  | 0.266034145 | 3.04  | 1129.1  | 1018.4 | 3.56   | 7.22  | High | High | High | High | High | High | 1 |
| FALSE | High   | Master Prq C94A7-1   | Sideroflexi  | 0.006 | 2.35    | 4  | 1  | 1  | 1  | 337  | 38    | 9.19  | 0      | 1  | transport    | membrane transporte       | P03820, 119559    | ENSG000001SFXNA     | 2         |             |                         |           | 0  | 1.14  | 0.334483186 | 22.73 | 265.1   | 215.8  | 13.21  | 17    | High | High | High | High | High | High | 1 |
| FALSE | High   | Master Prq C9288-1   | Rho ganci    | 0.007 | 2.235   | 1  | 1  | 1  | 1  | 912  | 102.4 | 5.66  | 3.02   | 1  | cell profile | cytoplasm; enzyme re      | P00621, F 9138    | ENSG000001ARHGFE1   | 6         | Proteoglyc  | G Protein G alpha (12)  |           | 20 | 1.14  | 0.616433299 | 26.51 | 199.9   | 175.4  | 7.42   | 16.36 | High | High | High | High | High | High | 1 |
| FALSE | High   | Master Prq C9P5197   | Reticulari   | 0.003 | 3.137   | 1  | 1  | 1  | 1  | 1032 | 112.5 | 4.96  | 4.21   | 1  | cell death;  | endoplasm protein br      | P02453, F 10313   | ENSG000001RTN3      | 11        | Alzheimer'  | Synaptic ac             |           | 4  | 1.139 | 0.05932131  | 0.89  | 468.6   | 430.6  | 4.36   | 6.61  | High | High | High | High | High | High | 1 |
| FALSE | High   | Master Prq P84074    | Neuron-sp    | 0     | 6.431   | 15 | 3  | 4  | 3  | 193  | 22.4  | 4.97  | 4.89   | 3  | regulation   | cytoplasm; metal ion      | P00036, F 3208    | ENSG000001HPCA      | 1         |             |                         |           | 0  | 1.139 | 0.131780002 | 2.85  | 54.1    | 45.9   | 13.34  | 5.93  | High | High | High | High | High | High | 1 |
| FALSE | High   | Master Prq C9BW92    | Threonine-   | 0     | 10.747  | 4  | 2  | 3  | 2  | 718  | 8.1   | 7.3   | 12.3   | 2  | metabolic    | cytoplasm; catalytic ac   | P00587, F 80222   | ENSG000001TARS2     | 1         | Aminoacyl   | Mitochond               |           | 5  | 1.139 | 0.213956923 | 13.23 | 933.2   | 825.9  | 7.09   | 9.02  | High | High | High | High | High | High | 1 |
| FALSE | High   | Master Prq C014732-1 | inositol m   | 0     | 13.831  | 7  | 2  | 4  | 2  | 288  | 31.3  | 6.61  | 9.92   | 2  | metabolic    | cytoplasm; catalytic ac   | P00459, 3613      | ENSG000001IMPA2     | 18        | Inositol ph | Synthesis c             |           | 6  | 1.139 | 0.367458181 | 24.22 | 1503.1  | 1295.4 | 20.33  | 14.1  | High | High | High | High | High | High | 1 |
| FALSE | High   | Master Prq C9BNC0    | Carbohydr    | 0     | 7.246   | 6  | 2  | 2  | 2  | 376  | 43    | 9.48  | 3.95   | 2  | metabolic    | Golgi;mem                 | P03567, 113189    | ENSG000001CHST14    | 15        | Glycosami   | Metathapsin Defective c |           | 11 | 1.139 | 0.417459372 | 28.89 | 1161.5  | 1006.2 | 17.01  | 13.98 | High | High | High | High | High | High | 1 |
| FALSE | High   | Master Prq P13928    | Annexin A1   | 0     | 66.385  | 36 | 12 | 26 | 1  | 327  | 36.9  | 7.78  | 64.73  | 12 | cell organ   | cytosol;me                | P01091, 653145; 7 | ENSG000001ANXA8; AN | 10        |             |                         |           | 0  | 1.139 | 0.517064524 | 40.42 | 754.4   | 673.2  | 28.96  | 17.05 | High | High | High | High | High | High | 1 |
| FALSE | High   | Master Prq P13995    | Bifunction   | 0     | 47.119  | 42 | 9  | 13 | 9  | 350  | 37.9  | 8.73  | 33.98  | 9  | metabolic    | metal catalytic ac        | P00763, F 10797   | ENSG000001MTHFD2    | 2         | Metabolic   | Folate Met Metabolis    |           | 10 | 1.138 | 0.033767724 | 0.22  | 4164.3  | 3664.4 | 8.81   | 5.31  | High | High | High | High | High | High | 1 |
| FALSE | High   | Master Prq C9P6P5    | E3 ubiquiti  | 0     | 38.947  | 21 | 5  | 13 | 5  | 407  | 43.4  | 5.86  | 36.58  | 5  | cell differ  | cytoplasm; protein br     | P00076, F 26528   | ENSG000001DAZAP1    | 19        | mRNA sur    |                         |           | 1  | 1.138 | 0.042687576 | 3.52  | 2767.4  | 2492.9 | 6.44   | 7.15  | High | High | High | High | High | High | 1 |
| FALSE | High   | Master Prq C95071    | D3-abso      | 0     | 20.001  | 3  | 5  | 5  | 5  | 2799 | 309.2 | 8.55  | 8.73   | 5  | cell profile | cytosol;me                | P00632, F 51366   | ENSG000001UBR5      | 8         | Ubiquitin   | in Mesoderm             |           | 3  | 1.138 | 0.078493755 | 0.13  | 216.2   | 190.9  | 0.93   | 4.36  | High | High | High | High | High | High | 1 |
| FALSE | High   | Master Prq C9H307    | Plinin (OS)  | 0     | 41.365  | 18 | 10 | 13 | 10 | 717  | 81.6  | 7.14  | 33.32  | 10 | metabolic    | membrane DNA bindi        | P04696, F 5411    | ENSG000001PNN       | 14        | RNA trans   |                         |           | 2  | 1.138 | 0.085374729 | 2.95  | 864.8   | 779.1  | 1.7    | 5.12  | High | High | High | High | High | High | 1 |
| FALSE | High   | Master Prq C9B7C07-1 | TBC1 domi    | 0     | 6.054   | 1  | 1  | 2  | 1  | 691  | 79.4  | 5.67  | 4.03   | 1  | regulation   | cytoplasm; enzyme re      | P00566, F 64786   | ENSG000001TBC1D15   | 12        |             | TBC/RABG                |           | 4  | 1.138 | 0.341863428 | 21.49 | 565.4   | 473.9  | 17.31  | 14.81 | High | High | High | High | High | High | 1 |
| FALSE | High   | Master Prq P05187    | alkaline ph  | 0     | 229.369 | 58 | 26 | 83 | 9  | 535  | 57.9  | 6.29  | 208.04 | 26 | metabolic    | cell surface catalytic ac | P00345, 2150      | ENSG000001ALPP      | 2         | Metabolic   | Intra-Golgi             |           | 7  | 1.138 | 0.961203318 | 38.13 | 10939.4 | 9612.8 | 18.5   | 23.02 | High | High | High | High | High | High | 1 |
| FALSE | High   | Master Prq P18754-1  | Regulator    | 0     | 12.272  | 12 | 4  | 5  | 4  | 421  | 44.9  | 7.52  | 6.88   | 4  | cell divisi  | chromosor DNA bindi       | P00415, F 1104    | ENSG000001RCC1      | 1         | Rev-media   |                         |           | 9  | 1.137 | 0.031922243 | 1.3   | 665     | 580.4  | 5.01   | 2.26  | High | High | High | High | High | High | 1 |
| FALSE | High   | Master Prq C9BIV8    | Phospholip   | 0     | 11.307  | 10 | 3  | 4  | 3  | 490  | 54.7  | 6.47  | 5.18   | 3  | metabolic    | endoplasm catalytic ac    | P00614, F 23646   | ENSG000001PLD3      | 19        | Ether lipid | Synthesis c             |           | 12 | 1.137 | 0.102616291 | 4.35  | 753.3   | 662.2  | 2.02   | 8.72  | High | High | High | High | High | High | 1 |
| FALSE | High   | Master Prq C9NKR29   | Lymphoid-    | 0.002 | 3.761   | 3  | 2  | 2  | 2  | 838  | 97    | 7.93  | 2.59   | 2  | cell divisi  | membrane catalytic ac     | P00176, F 3070    | ENSG000001HELLS     | 10        | Apoptosis;  |                         |           | 2  | 1.137 | 0.133148954 | 2.06  | 617.1   | 574.6  | 5.75   | 7.61  | High | High | High | High | High | High | 1 |
| FALSE | High   | Master Prq C9H414    | Serine-sp    | 0     | 5.318   | 3  | 1  | 2  | 1  | 574  | 65    | 8.56  | 4.09   | 1  | metabolic    | cytoplasm; catalytic ac   | P02902, 26168     | ENSG000001SENP3     | 17        | Major pat   |                         |           | 4  | 1.137 | 0.433018223 | 13.3  | 167.4   | 147.3  | 20.34  | 5.13  | High | High | High | High | High | High | 1 |
| FALSE | High   | Master Prq C9TAC12-1 | ATP synth    | 0     | 5.843   | 7  | 2  | 3  | 2  | 328  | 36.4  | 7.96  | 6.94   | 2  | cell organ   | mitochond protein br      | P06644, 64756     | ENSG000001ATP1A1    | 10        |             |                         |           | 0  | 1.137 | 0.592607885 | 3.87  | 608.8   | 574.3  | 9.05   | 8.16  | High | High | High | High | High | High | 1 |
| FALSE | High   | Master Prq C104949   | Cytochrom    | 0     | 17.975  | 38 | 4  | 9  | 4  | 82   | 9.9   | 10.08 | 16.55  | 4  | metabolic    | membrane catalytic ac     | P02939, F 27089   | ENSG000001UQC9C     | 5         | Non-alcoh   | Electron Tr Respirator  |           | 12 | 1.136 | 0.0741671   | 8.49  | 3340.1  | 3150.8 | 5.77   | 7     |      |      |      |      |      |      |   |

|       |        |        |            |              |      |        |    |    |     |    |      |       |       |        |    |              |           |             |         |                 |                  |    |              |            |             |              |             |              |        |          |         |       |       |      |      |      |      |      |       |   |  |
|-------|--------|--------|------------|--------------|------|--------|----|----|-----|----|------|-------|-------|--------|----|--------------|-----------|-------------|---------|-----------------|------------------|----|--------------|------------|-------------|--------------|-------------|--------------|--------|----------|---------|-------|-------|------|------|------|------|------|-------|---|--|
| FALSE | High   | Master | QC39YN0    | slifredize   | 0    | 26.37  | 39 | 4  | 4   | 4  | 137  | 14.3  | 8.19  | 16.35  | 4  | metabolic    | cytoplasm | antioxidant | PI02195 | 140809          | ENSG000001SRXN1  | 20 | Photodyna    | 1          | 1.129       | 0.755807259  | 27.47       | 1096         | 996    | 12       | 42.25   | High  | High  | High | High | High | High | 1    | [R16] |   |  |
| FALSE | High   | Master | QC314320   | Protein FA   | 0    | 28.145 | 15 | 5  | 7   | 5  | 339  | 40.2  | 6.83  | 13.45  | 5  | nucleus      | RNA bindi | PI04921     | 91330   | ENSG000001FMSA2 | 4                |    | 0            | 1.128      | 0.066785417 | 25.9         | 1286.4      | 1145.9       | 3.23   | 3.38     | High    | High  | High  | High | High | High | 1    |      |       |   |  |
| FALSE | High   | Master | QC313271   | Carbamoyl    | 0    | 646.64 | 59 | 85 | 301 | 81 | 1500 | 164.8 | 6.74  | 761.59 | 85 | cell differe | cytoplasm | catalytic a | PI00117 | 19130           | ENSG000001CPSA2  | 2  | Nitrogen m   | Amino Acid | Urea cycle  | 12           | 1.128       | 0.0384604039 | 71.3   | 101584.8 | 91422.2 | 11.35 | 6.44  | High | High | High | High | High | High  | 1 |  |
| FALSE | High   | Master | QC309NE7-1 | E3 ubiquiti  | 0    | 17.496 | 19 | 6  | 9   | 6  | 303  | 34.8  | 5.87  | 19.27  | 6  | metabolic    | cytoplasm | catalytic a | PI00515 | F_10273         | ENSG000001STUB1  | 16 | Protein prc  | Androgen r | Regulation  | 25           | 1.128       | 0.698268752  | 1.57   | 2657     | 2465    | 22.34 | 10.77 | High | High | High | High | High | High  | 1 |  |
| FALSE | High   | Master | QC316298   | serine/threo | 0    | 4.831  | 6  | 2  | 2   | 2  | 524  | 5.9   | 5.91  | 20.8   | 2  | cell differe | cytosol   | catalytic a | PI00149 | 5532            | ENSG000001PP3CB  | 10 | Natural kill | Physiology | Signaling b | 52           | 1.128       | 0.77686454   | 3.39   | 467      | 50.9    | 20.18 | 19.58 | High | High | High | High | High | High  | 1 |  |
| FALSE | High   | Master | QC343399   | Tumor pro    | 0    | 45.228 | 62 | 9  | 20  | 9  | 206  | 22.2  | 5.36  | 42.98  | 9  | regulation   | cytoplasm | protein bin | PI04201 | 7165            | ENSG000001PDS212 | 20 |              | 0          | 1.127       | 0.0935050267 | 3.82        | 3846.6       | 3426.8 | 8.39     | 3.79    | High  | High  | High | High | High | High | 1    |       |   |  |
| FALSE | High   | Master | QC3GNW6-4  | Pr-r-mRNA    | 0    | 9.896  | 9  | 4  | 4   | 4  | 420  | 46.9  | 8.54  | 7.86   | 4  | cell organi  | cytoplasm | metal ion   | PI00076 | F_55696         | ENSG000001RBM22  | 5  | Spliceosom   | mRNA Spli  | 5           | 1.127        | 0.193588202 | 9.28         | 930.3  | 820.2    | 9.42    | 4.78  | High  | High | High | High | High | High | 1     |   |  |
| FALSE | High   | Master | QC313895   | Bystin [iso  | 0    | 6.143  | 7  | 3  | 3   | 3  | 437  | 49.6  | 8.12  | 2.81   | 3  | cell differe | cytoplasm | protein bin | PI05291 | 705             | ENSG000001BVL6   | 6  | Major patt   |            | 4           | 1.127        | 0.35059317  | 22.85        | 535.2  | 474.8    | 3.74    | 15.85 | High  | High | High | High | High | High | 1     |   |  |
| FALSE | High   | Master | QC3GNK20   | 395 riboso   | 0    | 6.624  | 8  | 2  | 2   | 2  | 251  | 28.4  | 10.13 | 2.7    | 2  | cell organi  | membrane  | RNA bindi   | PI00252 | 5498            | ENSG000001MRPL16 | 11 | Ribosome     | Mitochond  | 7           | 1.127        | 0.352533482 | 8.37         | 107.8  | 105.8    | 11.26   | 6.09  | High  | High | High | High | High | High | 1     |   |  |
| FALSE | Medium | Master | QC3G6972   | THO comp     | 0.01 | 2.068  | 6  | 1  | 1   | 1  | 204  | 23.7  | 5.67  | 0      | 1  | metabolic    | cytoplasm | protein bin | PI05615 | 80145           | ENSG000001THOC7  | 3  | RNA trans    |            | 10          | 1.127        | 0.546875364 | 12.04        | 592.6  | 529.8    | 7.36    | 9.86  | High  | High | High | High | High | High | 1     |   |  |
| FALSE | High   | Master | QC3T2725-1 | TRMT1-like   | 0    | 21.535 | 6  | 3  | 4   | 3  | 733  | 81.7  | 18.8  | 16.02  | 3  | metabolic    |           | catalytic a | PI02005 | F_81627         | ENSG000001TRMT1  | 1  |              | 0          | 1.127       | 0.68567728   | 4.46        | 1011.3       | 897.2  | 6.54     | 9.42    | High  | High  | High | High | High | High | 1    |       |   |  |
| FALSE | High   | Master | QC3P0519   | Heme oxy     | 0    | 60.835 | 43 | 10 | 19  | 10 | 316  | 36    | 54.1  | 57.2   | 10 | cellular ho  | endoplasm | catalytic a | PI01126 | 3163            | ENSG000001HMOX2  | 16 | CHR_H        | Mineral ab |             | 0            | 1.126       | 0.197927332  | 11.1   | 2271.1   | 2179.6  | 17.3  | 7.3   | High | High | High | High | High | High  | 1 |  |
| FALSE | High   | Master | QC3Q5621   | Beta-actin   | 0    | 118.41 | 21 | 10 | 137 | 2  | 376  | 42    | 5.59  | 3      |    |              |           |             |         |                 |                  |    |              |            |             |              |             |              |        |          |         |       |       |      |      |      |      |      |       |   |  |

|       |      |                     |                           |       |        |    |    |    |    |      |       |       |       |    |              |                        |             |           |                     |               |             |             |             |          |             |             |            |        |        |        |      |      |      |        |      |      |      |      |   |
|-------|------|---------------------|---------------------------|-------|--------|----|----|----|----|------|-------|-------|-------|----|--------------|------------------------|-------------|-----------|---------------------|---------------|-------------|-------------|-------------|----------|-------------|-------------|------------|--------|--------|--------|------|------|------|--------|------|------|------|------|---|
| FALSE | High | Master Pcr Q8BW56   | Poly(ADP-ribose) synthase | 0     | 5.466  | 2  | 1  | 1  | 1  | 976  | 111   | 6.43  | 4.97  | 1  | metabolic    | cytoplasm; catalytic a | P105028     | 8505, 670 | ENG50000 PARG; BPG  | 10; 6         |             | POLB-Dep    | 5           | 1.116    | 0.709091717 | 2.13        | 431.3      | 417.3  | 11.6   | 5.3    | High | High | High | High   | High | High | 1    |      |   |
| FALSE | High | Master Pcr Q14671.3 | Isomorph 3                | 0     | 39.221 | 8  | 7  | 10 | 5  | 1188 | 126.6 | 6.84  | 27.19 | 7  | cell differe | cytosol; protein b     | PD0806      | 9698      | ENG50000 PUM1       | 1             |             |             | 0           | 1.115    | 0.238121748 | 2           | 572.1      | 518.5  | 5.72   | 2.12   | High | High | High | High   | High | High | 1    |      |   |
| FALSE | High | Master Pcr Q36M20   | Protein LSF               | 0.004 | 2.655  | 4  | 1  | 2  | 1  | 195  | 21.7  | 6.74  | 4.76  | 1  |              |                        | PI09793     | 128401.6  | ENG50000 LSM12; LSI | 17; 8         |             |             | 0           | 1.115    | 0.283713314 | 13.54       | 345.7      | 310.1  | 9.89   | 12.3   | High | High | High | High   | High | High | 1    |      |   |
| FALSE | High | Master Pcr P50750   | Cyclin-dep                | 0     | 4.598  | 7  | 2  | 2  | 2  | 372  | 42.8  | 8.79  | 2.39  | 1  | cell profile | chromosome             | PD00669     | 1025      | ENG50000 CDK9       | 9             | Transcripti | MicroRNA    | RNA polyd   | 35       | 1.115       | 0.378192393 | 21.78      | 134.9  | 120.9  | 21.56  | 16.7 | High | High | High   | High | High | High | 1    |   |
| FALSE | High | Master Pcr Q96136   | Cytochrome                | 0.006 | 2.349  | 12 | 1  | 1  | 1  | 57   | 6.6   | 9.55  | 1.73  | 1  | cell organi  | metabolic              | PT14880     | 84987     | ENG50000 CXD14      | 12            |             |             | 9           | 1.115    | 0.457598663 | 8.15        | 1345       | 1149.7 | 3.85   | 14.3   | High | High | High | High   | High | High | 1    |      |   |
| FALSE | High | Master Pcr P78310.1 | Cosackevir                | 0     | 11.232 | 7  | 2  | 3  | 2  | 365  | 40    | 7.56  | 2.29  | 2  | cell commu   | cytoplasm; protein b   | PD7679, F   | 1525      | ENG50000 CXADR      | 21            | Viral myoc  |             |             | 6        | 1.115       | 0.78726208  | 16.35      | 667.5  | 613.3  | 24.55  | 4.79 | High | High | High   | High | High | High | 1    |   |
| FALSE | High | Master Pcr Q980Q3   | Goli ergo                 | 0     | 16.455 | 8  | 2  | 2  | 1  | 440  | 46.5  | 4.5   | 8.91  | 2  | cell organi  | Goli; mem              | PD4495, F   | 64689     | ENG50000 CXOPR1     | 3             |             |             | COPII (Coal | 14       | 1.115       | 0.283000244 | 33.72      | 229.7  | 206    | 23.65  | 8.11 | High | High | High   | High | High | High | 1    |   |
| FALSE | High | Master Pcr Q9HD34   | LYR motif                 | 0     | 4.839  | 15 | 1  | 2  | 1  | 91   | 10.8  | 10.73 | 8.07  | 1  | metabolic    | mitochond              | PD5347, F   | 57128     | ENG50000 LYRM4      | 6             |             |             | MT          | 2        | 1.114       | 0.060398077 | 7.12       | 1224.4 | 1095.3 | 1.62   | 6.61 | High | High | High   | High | High | High | 1    |   |
| FALSE | High | Master Pcr P16070   | CDA4 anti                 | 0     | 47.821 | 13 | 9  | 26 | 9  | 742  | 81.5  | 5.33  | 47.47 | 9  | cell organi  | cell surface           | PD00193     | 960       | ENG50000 CD4        | 11            | ECM-recep   | Hepatitis B | Integri     | 25       | 1.114       | 0.14092143  | 9.18       | 3159.7 | 2835.2 | 11.06  | 4.55 | High | High | High   | High | High | High | 1    |   |
| FALSE | High | Master Pcr Q15007   | Pre-mRNA                  | 0     | 7.68   | 7  | 2  | 2  | 2  | 396  | 44.2  | 5.19  | 6.84  | 2  | metabolic    | membrane               |             | 9589      | ENG50000 WTP4       | 6             |             |             | Processing  | 2        | 1.114       | 0.332763738 | 9.4        | 1022.3 | 975.1  | 3.87   | 9.88 | High | High | High   | High | High | High | 1    |   |
| FALSE | High | Master Pcr Q9E435   | 395 riboso                | 0     | 8.634  | 16 | 3  | 4  | 3  | 216  | 24.9  | 9.29  | 1.7   | 3  | cell organi  | membrane               | PD00467     | 79590     | ENG50000 MRPL24     | 1             |             |             | Ribosome    | 2        | 1.114       | 0.474960706 | 32.58      | 292.3  | 279.8  | 30.78  | 7.33 | High | High | High   | High | High | High | 1    |   |
| FALSE | High | Master Pcr P04062   | glycosylce                | 0     | 19.11  | 11 | 4  | 7  | 4  | 536  | 59.7  | 7.61  | 18.76 | 4  | cell comm    | membrane               | catalytic a | PD2055    | 2629                | ENG50000 GGA4 | 19          | Other glyci |             | Glycosph | 12          | 1.113       | 0.36450278 | 5.31   | 3126.3 | 2735.5 | 5.56 | 9.17 | High | High   | High | High | High | High | 1 |
| FALSE | High | Master Pcr Q03252   | Lamin-B2                  | 0     | 43.251 | 21 | 15 | 21 | 10 | 620  | 69.9  | 5.59  | 30.18 | 15 | membrane     | catalytic a            | PD00038, F  | 84823     | ENG50000 LMNB2      | 8             | Apoptosis   | Gastric car |             | 3        | 1.113       | 0.187667217 | 6.46       | 4420.1 | 4080.8 | 5.86   | 4.3  | High | High | High</ |      |      |      |      |   |

|       |      |                     |             |       |         |    |    |     |    |      |       |       |        |    |                                       |                        |                      |                   |                  |             |              |             |             |    |       |             |             |             |             |         |        |        |       |      |      |      |      |      |      |      |   |
|-------|------|---------------------|-------------|-------|---------|----|----|-----|----|------|-------|-------|--------|----|---------------------------------------|------------------------|----------------------|-------------------|------------------|-------------|--------------|-------------|-------------|----|-------|-------------|-------------|-------------|-------------|---------|--------|--------|-------|------|------|------|------|------|------|------|---|
| FALSE | High | Master Prq P26885   | Peptidyl-pi | 0     | 14.49   | 19 | 2  | 4   | 2  | 142  | 15.6  | 9.13  | 10.43  | 2  | metabolic; endoplasm; catalytic       | ai P00254              | 2286                 | ENSG00000 FKBP2   | 11               |             |              |             |             |    |       |             | 0           | 1.102       | 0.139168773 | 8.96    | 2066.1 | 1874.6 | 2.18  | 4.75 | High | High | High | High | High | High | 1 |
| FALSE | High | Master Prq P43034   | Platelet-ac | 0     | 13.449  | 9  | 3  | 5   | 3  | 410  | 46.6  | 7.37  | 19.14  | 3  | cell comm; chromosor; catalytic       | ai P04000; F5048       | ENSG00000 PAFAH1B1   | 17                | Ether lipid      | Wnt Signa   | COP1-inde    |             |             |    |       | 37          | 1.102       | 0.22388281  | 10.81       | 2190.1  | 1956.8 | 7.69   | 6.42  | High | High | High | High | High | High | 1    |   |
| FALSE | High | Master Prq Q14980.1 | nuclear mi  | 0     | 109.812 | 14 | 25 | 29  | 25 | 2115 | 238.1 | 5.78  | 84.14  | 25 | cell differe; chromosor; protein bi   | P04111; F4926          | ENSG00000 NUNMA1     | 11                |                  | Ecotomer i  | Mitotic Pr   |             |             |    |       | 7           | 1.102       | 0.393172828 | 20.61       | 8684.5  | 8047.4 | 25.63  | 6.74  | High | High | High | High | High | High | 1    |   |
| FALSE | High | Master Prq Q064E4.2 | isoform 2   | 0     | 177.517 | 49 | 28 | 74  | 2  | 653  | 68.6  | 7.31  | 134.95 | 28 | metabolic; nucleus                    | DNA bindi              | P00738; F8880        | ENSG00000 UBP1    | 1                |             |              |             |             |    |       | 0           | 1.102       | 0.406631627 | 21.48       | 214.1   | 221.2  | 37.24  | 8.91  | High | High | High | High | High | High | 1    |   |
| FALSE | High | Master Prq Q096K25  | Uridine-cyt | 0.002 | 3.641   | 2  | 1  | 1   | 1  | 548  | 61.1  | 7.36  | 3.8    | 1  | metabolic; cytoplasm; catalytic       | ai P00045; F54963      | ENSG00000 UCKN1      | 20                | Metabolic        |             | Pyrimidine   |             |             |    | 7     | 1.102       | 0.419819872 | 23.52       | 447.6       | 406.3   | 17.06  | 7.11   | High  | High | High | High | High | High | 1    |      |   |
| FALSE | High | Master Prq Q096H8   | Alpha-1,2-  | 0.002 | 4.098   | 2  | 1  | 1   | 1  | 611  | 69.8  | 8.68  | 3.52   | 1  | metabolic; endoplasm; catalytic       | ai P03091              | 79796                | ENSG00000 ALG9    | 11               | N-Glycan    | Biosynthe    |             |             |    | 10    | 1.102       | 0.88322171  | 27.24       | 274.9       | 330.4   | 40.33  | 18.57  | High  | High | High | High | High | High | 1    |      |   |
| FALSE | High | Master Prq P01802   | HLA class I | 0     | 131.685 | 34 | 12 | 41  | 1  | 365  | 40.9  | 6.99  | 117.88 | 12 | cell comm; cell surface; protein bi   | P00129; F3105; 1009    | ENSG00000 HLA-A; LOC | 6                 | CHR_H5           | Proteasom   | Interferon   |             |             |    | 25    | 1.101       | 0.129646718 | 7.38        | 2407.2      | 2134.7  | 1.82   | 9.08   | High  | High | High | High | High | High | 1    |      |   |
| FALSE | High | Master Prq P11166   | Solute can  | 0     | 16.327  | 10 | 3  | 4   | 3  | 492  | 54    | 8.72  | 16.14  | 3  | cell comm; cytoplasm; protein bi      | P00083; F6513          | ENSG00000 SLC2A1     | 2                 | Pathways         | Cori Cycle  | Lactose sy   |             |             |    | 33    | 1.101       | 0.313095554 | 15.32       | 764.5       | 694.5   | 26.28  | 10.38  | High  | High | High | High | High | High | 1    |      |   |
| FALSE | High | Master Prq Q13057   | Bifunction  | 0     | 52.327  | 23 | 9  | 14  | 9  | 564  | 62.3  | 6.99  | 41.15  | 9  | metabolic; cytoplasm; catalytic       | ai P01121; F80347      | ENSG00000 COASY      | 17                | Metabolic        |             | Coenzyme     |             |             |    | 7     | 1.101       | 0.357443371 | 8.9         | 3116.9      | 2829.9  | 43.83  | 0.52   | High  | High | High | High | High | High | 1    |      |   |
| FALSE | High | Master Prq Q10540   | Syntaxin-7  | 0     | 16.585  | 20 | 4  | 5   | 4  | 261  | 29.8  | 5.55  | 9.16   | 4  | cell organ; endosome; protein bi      | P005739; F8417         | ENSG00000 STX7       | 6                 | SNARE int        |             |              |             |             | 2  | 1.101 | 0.447185317 | 25.82       | 452.5       | 406.4       | 16.62   | 3.68   | High   | High  | High | High | High | High | 1    |      |      |   |
| FALSE | High | Master Prq Q32M24.2 | isoform 2   | 0     | 35.316  | 11 | 6  | 8   | 6  | 784  | 86.4  | 4.65  | 26.43  | 6  | metabolic; cytoplasm; DNA bindi       | P00738                 | 9208                 | ENSG00000 URRP1   | 1                |             |              |             |             | 0  | 1.101 | 0.489662617 | 38.91       | 2204.1      | 2002.6      | 5.11    | 16.98  | High   | High  | High | High | High | High | 1    |      |      |   |
| FALSE | High | Master Prq Q098Q6   | MICOS cor   | 0     | 9.759   | 7  | 1  | 2   | 1  | 235  | 26.4  | 8.85  | 9.13   | 1  | cell organ; cytosol; me               | protein bi             | P005300              | 84303             | ENSG00000 CHCHD6 | 2           |              |             | Cristae for |    |       | 3           | 1.101       | 0.545439489 | 36.75       | 251.8   | 228.8  | 21.93  | 15.08 | High | High | High | High | High | High | 1    |   |
| FALSE | High | Master Prq Q098X8-1 | Redox-reg   | 0     | 31.366  | 28 | 5  | 11  | 5  | 229  | 25.7  | 8.84  | 23.92  | 5  | metabolic; cytoplasm; antioxidant     | P13911                 | 84293                | ENSG00000 FAM213A | 10               |             |              |             |             |    | 0     | 1.101       | 0.911365255 | 12.01       | 1402.4      | 1273.7  | 12     | 9.25   | High  | High | High | High | High | High | 1    |      |   |
| FALSE | High | Master Prq P51114-1 | Fragile X r | 0     | 28.978  | 12 | 5  | 10  | 3  | 621  | 69.7  | 6.15  | 30.29  | 5  | cell death; cytoplasm; protein bi     | P00013; F8087          | ENSG00000 FXR1       | 3                 | RNA trans        |             | Signalling b |             |             |    | 5     | 1.1         | 0.211569327 | 6.95        | 1927.7      | 1752.6  | 1.06   | 6.41   | High  | High | High | High | High | High | 1    |      |   |
| FALSE | High | Master Prq A4D1E9-1 | GTP-bindir  | 0.001 | 4.286   | 4  | 2  | 2   | 2  | 387  | 42.9  | 9.03  | 3.93   | 2  | metabolic; chromosor; catalytic       | ai P00005; F85865      | ENSG00000 GTPBP10    | 10                |                  |             |              |             |             | 0  | 1.1   | 0.283740223 | 1.54        | 279.9       | 271.1       | 9.6     | 5.93   | High   | High  | High | High | High | High | 1    |      |      |   |
| FALSE | High | Master Prq QASPL7   | transmeml   | 0.007 | 2.307   | 6  | 2  | 2   | 2  | 270  | 31.1  | 6.83  | 2      | 2  | metabolic; cytoplasm; catalytic       | ai P010520             | 387521; 38           | ENSG00000 TMEM189 | 20               |             |              |             |             |    | 0     | 1.1         | 0.339986624 | 17.95       | 259.9       | 231.7   | 1.41   | 15.12  | High  | High | High | High | High | High | 1    |      |   |
| FALSE | High | Master Prq Q00139   | Kinesin-iii | 0     | 17.611  | 4  | 3  | 5   | 2  | 706  | 79.9  | 6.68  | 8.52   | 3  | cell differe; cytoplasm; catalytic    | ai P00225              | 3796                 | ENSG00000 KIF2A   | 5                |             |              |             |             |    | 27    | 1.1         | 0.354839761 | 14.17       | 1412.5      | 1283.9  | 34.2   | 3.35   | High  | High | High | High | High | High | 1    |      |   |
| FALSE | High | Master Prq P84047   | ATP synth   | 0     | 47.204  | 56 | 9  | 18  | 9  | 213  | 23.3  | 9.96  | 45.34  | 9  | cell organ; membrane; catalytic       | ai P00213              | 539                  | ENSG00000 ATP5O   | 21               | Oxidative e | Electron Tr  | Cristae for |             |    | 14    | 1.1         | 0.390905052 | 6.04        | 3341.9      | 3132.1  | 2.12   | 8.69   | High  | High | High | High | High | High | 1    |      |   |
| FALSE | High | Master Prq P31153   | S-adenosyl  | 0     | 74.201  | 34 | 14 | 33  | 10 | 395  | 43.6  | 6.48  | 84.52  | 14 | cell organ; cytosol; catalytic        | ai P00438; F4144       | ENSG00000 MAT2A      | 2                 | Cysteine ar      | Trans-sulfi | Methylation  |             |             | 10 | 1.1   | 0.490887108 | 16.58       | 16459       | 14967.8     | 5.68    | 10.12  | High   | High  | High | High | High | High | 1    |      |      |   |
| FALSE | High | Master Prq P62873   | Guanine bi  | 0     | 105.523 | 52 | 11 | 30  | 7  | 340  | 37.4  | 6     | 106.55 | 11 | cell death; cytosol; me               | catalytic              | P00400               | 2782              | ENSG00000 GNB1   | 1           | Dopamine     | Nicotinic A | G alpha (z) |    |       | 84          | 1.1         | 0.679814108 | 23.07       | 5301    | 4819.2 | 16.62  | 5.93  | High | High | High | High | High | High | 1    |   |
| FALSE | High | Master Prq A3KMh1   | von Willeb  | 0.001 | 4.193   | 0  | 1  | 2   | 1  | 1905 | 214.7 | 7.4   | 7.37   | 1  | mitochondr                            | catalytic              | P23078               | ENSG00000 VWA8    | 13               |             |              |             |             |    | 0     | 1.099       | 0.010607778 | 0.91        | 401.7       | 365.4   | 4.02   | 5.82   | High  | High | High | High | High | High | 1    |      |   |
| FALSE | High | Master Prq P27797   | Calreticul  | 0     | 241.664 | 62 | 24 | 101 | 24 | 417  | 48.1  | 4.44  | 301.23 | 24 | cell differe; cell surface; DNA bindi | P00262                 | 811                  | ENSG00000 CALR    | 19               | Antigen pri | Androgen     | Scavenging  |             |    | 32    | 1.099       | 0.018978121 | 2.14        | 36738.9     | 33443.1 | 1.73   | 4.03   | High  | High | High | High | High | High | 1    |      |   |
| FALSE | High | Master Prq Q0BTW9   | Tubulin-sr  | 0     | 26.359  | 7  | 6  | 6   | 6  | 1192 | 132.5 | 6.19  | 13.57  | 6  | cell organ; cytoplasm; enzyme re      | P121612                | 6904                 | ENSG00000 TBCD    | 17               |             |              | Post-charge |             |    | 3     | 1.099       | 0.036687604 | 1.81        | 741.4       | 687.2   | 2.26   | 2.82   | High  | High | High | High | High | High | 1    |      |   |
| FALSE | High | Master Prq P62241   | 40S riboso  | 0     | 49.004  | 39 | 8  | 27  | 8  | 208  | 24.2  | 10.32 | 79.43  | 8  | cell organ; cytoplasm; protein bi     | P010201                | 6202                 | ENSG00000 RPS18   | 1                | Ribosome    | Cytoplasm    | Peptide ch  |             |    | 38    | 1.099       | 0.153840536 | 9.49        | 11654.7     | 10590.4 | 2.37   | 6.08   | High  | High | High | High | High | High | 1    |      |   |
| FALSE | High | Master Prq Q00839   | Heterogen   | 0     | 350.09  | 52 | 49 | 172 | 6  | 825  | 90.5  | 6     | 403.53 | 49 | cell differe; cell surface; DNA bindi | P00622; F3192          | ENSG00000 HNRNP1     | 1                 | Spliceosom       | mRNA Pro    | mRNA Spli    |             |             | 6  | 1.099 | 0.184558897 | 1.69        | 5214.7      | 4370.4      | 13.69   | 5.98   | High   | High  | High | High | High | High | 1    |      |      |   |
| FALSE | High | Master Prq Q0N490-2 | isoform 2   | 0     | 6.117   | 12 | 1  | 2   | 1  | 142  | 15.4  | 10.58 | 6.21   | 1  | metabolic; membrane; catalytic        | ai                     | 25953                | ENSG00000 PNKD    | 2                |             |              |             |             |    | 0     | 1.099       | 0.199318808 | 6.13        | 890.2       | 737.1   | 9.93   | 8      | High  | High | High | High | High | High | 1    |      |   |
| FALSE | High | Master Prq Q0NQR4   | Omega-arr   | 0     | 41.122  | 35 | 9  | 12  | 9  | 276  | 30.6  | 7.21  | 23.49  | 9  | metabolic; cytoplasm; catalytic       | ai P00795              | 56954                | ENSG00000 NIT2    | 3                | Alanine, as |              | Neurotroph  |             |    | 4     | 1.099       | 0.199702795 | 4.34        | 2983.5      | 2766.5  | 3.4    | 5.84   | High  | High | High | High | High | High | 1    |      |   |
| FALSE | High | Master Prq Q14137   | Ribosome    | 0     | 51.051  | 25 | 11 | 12  | 11 | 746  | 83.6  | 6.19  | 32.11  | 11 | cell organ; nucleus                   | protein bi             | P00400; F23246       | ENSG00000 BOP1    | 8                |             |              | Major path  |             |    | 4     | 1.099       | 0.209250095 | 3.19        | 1660.8      | 1511.3  | 1.67   | 8.24   | High  | High | High | High | High | High | 1    |      |   |
| FALSE | High | Master Prq P49790   | Nuclear pc  | 0     | 55.226  | 10 | 11 | 16  | 11 | 1475 | 153.8 | 8.73  | 39.4   | 11 | cell organ; cytosol; me               | DNA bindi              | P00641; F9972        | ENSG00000 NUP153  | 6                | RNA trans   | TGF-beta 5   | Rev-media   |             |    | 65    | 1.099       | 0.245769294 | 5.05        | 2689.6      | 2449.3  | 4.55   | 3.16   | High  | High | High | High | High | High | 1    |      |   |
| FALSE | High | Master Prq Q0BT03   | Uncharact   | 0     | 8.024   | 4  | 1  | 2   | 1  | 319  | 36.6  | 6.3   | 3.08   | 1  |                                       | P15112                 | 159013               | ENSG00000 Cxorf38 | X                |             |              |             |             | 0  | 1.099 | 0.526176967 | 12.59       | 243.8       | 236         | 13.68   | 3.6    | High   | High  | High | High | High | High | 1    |      |      |   |
| FALSE | High | Master Prq P62328   | Thymosin i  | 0     | 97.455  | 57 | 11 | 64  | 8  | 44   | 5.1   | 5.06  | 157.51 | 11 | cell differe; cytoplasm; catalytic    | ai P01290              | 7114                 | ENSG00000 TMS48X  | X                | Regulation  | Barbasase    | Platelet de |             |    | 7     | 1.099       | 0.575312003 | 32.11       | 11692       | 11872.1 | 21.04  | 12.85  | High  | High | High | High | High | High | 1    |      |   |
| FALSE | High | Master Prq Q72777   | 39S riboso  | 0     | 8.35    | 19 | 2  | 2   | 2  | 128  | 15.1  | 7.27  | 3.22   | 2  | cell organ; membrane; structural      | P009776                | 128308               | ENSG00000 MRP155  | 1                |             |              | Mitochond   |             |    | 6     | 1.098       | 0.001302564 | 0.69        | 711.1       | 643.8   | 1.01   | 0.81   | High  | High | High | High | High | High | 1    |      |   |
| FALSE | High | Master Prq Q09H96   | L2-hydrox   | 0     | 17.659  | 10 | 4  | 5   | 4  | 463  | 50.3  | 8.15  | 13.04  | 4  | metabolic; membrane; catalytic        | ai P01266              | 79944                | ENSG00000 L2HGD3  | 14               | Butanone    |              | Interconve  |             |    | 5     | 1.098       | 0.462028336 | 26.65       | 1610.8      | 1693.5  | 29.48  | 8.96   | High  | High | High | High | High | High | 1    |      |   |
| FALSE | High | Master Prq Q105031  | Probable L  | 0     | 15.534  | 6  | 4  | 4   | 4  | 903  | 101.9 | 8.22  | 10.63  | 4  | cell organ; mitochondr                | catalytic              | P00133; F23395       | ENSG00000 LARS2   | 3                | Aminoacyl   | Amino Acid   | Mitochond   |             |    | 6     | 1.098       | 0.480523352 | 1.65        | 763.2       | 719.2   | 6.5    | 3.55   | High  | High | High | High | High | High | 1    |      |   |
| FALSE | High | Master Prq P31942   | Heterogen   | 0     | 137.57  | 64 | 13 | 44  | 12 | 346  | 36.9  | 6.87  | 118.89 | 13 | cell differe; nucleus; sp             | protein bi             | P00196; F3189        | ENSG00000 HNRNP17 | 11               |             |              |             |             |    | 0     | 1.098       | 0.531095513 | 25.34       | 8332.3      | 7474.2  | 17.87  | 1.52   | High  | High | High | High | High | High | 1    |      |   |
| FALSE | High | Master Prq Q0NKR2   | 39S riboso  | 0     | 11.831  | 21 | 3  | 6   | 3  | 175  | 20    | 10.11 | 11.41  | 3  | cell organ; membrane; protein bi      | P01196                 | 63875                | ENSG00000 MRP17   | 11               | Ribosome    |              | Mitochond   |             |    | 7     | 1.098       | 0.732746797 | 44.85       | 909.5       | 930.6   | 25.19  | 17.87  | High  | High | High | High | High | High | 1    |      |   |
| FALSE | High | Master Prq Q00401   | Neural Wn   | 0     | 6.538   | 3  | 1  | 1   | 1  | 505  | 54.8  | 7.93  | 4.98   | 1  | cell division; cytoplasm; catalytic   | ai P00568; F8976; 1429 | ENSG00000 WASL       | ASB               | Regulation       | Pathogen    | Nephrin fx   |             |             | 37 | 1.098 | 0.931024647 | 13.7        | 333.1       | 395.9       | 23.96   | 15.12  | High   | High  | High | High | High | High | 1    |      |      |   |
| FALSE | High | Master Prq Q16718   | NADH deH    | 0     | 32.124  | 53 | 6  | 11  | 6  | 116  | 13.5  | 5.99  | 32.01  | 6  | cell organ; membrane; catalytic       | ai P004716             | 4698                 | ENSG00            |                  |             |              |             |             |    |       |             |             |             |             |         |        |        |       |      |      |      |      |      |      |      |   |

|       |        |                      |             |        |         |    |    |    |    |      |       |       |        |    |                            |              |                  |                    |               |             |                          |            |       |             |             |         |         |         |       |      |      |      |      |      |      |      |      |      |      |   |
|-------|--------|----------------------|-------------|--------|---------|----|----|----|----|------|-------|-------|--------|----|----------------------------|--------------|------------------|--------------------|---------------|-------------|--------------------------|------------|-------|-------------|-------------|---------|---------|---------|-------|------|------|------|------|------|------|------|------|------|------|---|
| FALSE | High   | Master Prq Q8TE01    | Probable g  | 0      | 12.012  | 16 | 3  | 5  | 3  | 209  | 23.9  | 9.35  | 12.58  | 3  | metabolic; membrane        | antioxidan   | PD0555, F 493869 | ENSG00000 GPX8     | 5             | Thyroid ho  | Detoxifica               | 6          | 1.092 | 0.169914909 | 9.3         | 463.3   | 420.1   | 0.59    | 8.53  | High | 1    |      |      |   |
| FALSE | High   | Master Prq Q60568    | Procollagen | 0      | 44.709  | 22 | 12 | 16 | 12 | 738  | 84.7  | 6.05  | 37.19  | 12 | cell organ; endoplasm      | catalytic ac | P03171, 8985     | ENSG00000 PLOC3    | 7             | Other type  | Collagen                 | 5          | 1.092 | 0.277085227 | 8.89        | 3275    | 2895.9  | 2.47    | 8.61  | High | 1    |      |      |   |
| FALSE | High   | Master Prq Q0B7A6    | Beta-caten  | 0      | 31.174  | 14 | 9  | 11 | 9  | 563  | 65.1  | 5.05  | 19.7   | 4  | cell death; cytoplasm;     | protein bi   | P08216, 56259    | ENSG00000 CTNNB1   | 20            | Spliceos    | NLRN Spli                | 5          | 1.092 | 0.394996548 | 19.19       | 2035.2  | 1933.7  | 18.61   | 7.29  | High | 1    |      |      |   |
| FALSE | High   | Master Prq Q9H045    | Transmem    | 0.0003 | 3.343   | 2  | 1  | 1  | 1  | 589  | 67.8  | 7.21  | 1.92   | 1  | membrane                   |              | P02990, 56889    | ENSG00000 TM9SF3   | 10            |             |                          | 0          | 1.092 | 0.428807747 | 22.22       | 673.4   | 595.6   | 21.63   | 13.62 | High | 1    |      |      |   |
| FALSE | High   | Master Prq Q9B7A0    | vesicle-ass | 0      | 0.012   | 8  | 1  | 2  | 1  | 100  | 11.4  | 7.34  | 4.98   | 1  | cell organ; cytoplasm;     | protein bi   | P00957, 8673     | ENSG00000 RMP68    | 2             | SNARE inte  |                          | 17         | 1.092 | 0.432579459 | 3.22        | 1176.8  | 1148.1  | 7.84    | 3.83  | High | 1    |      |      |   |
| FALSE | High   | Master Prq Q07960    | rho GTPase  | 0      | 22.371  | 17 | 5  | 9  | 5  | 439  | 50.4  | 6.29  | 21.28  | 5  | regulation; cytoplasm;     | enzyme re    | P00620, 392      | ENSG00000 ARHGAP1  | 11            |             | Rho GTPase               | 3          | 1.092 | 0.487746847 | 4.79        | 4828.9  | 4424    | 2.2     | 8.22  | High | 1    |      |      |   |
| FALSE | High   | Master Prq Q60568    | delta-1-gly | 0      | 181.652 | 44 | 25 | 61 | 25 | 795  | 87.2  | 7.12  | 159.6  | 25 | metabolic; cytoplasm;      | catalytic ac | P00017, 15832    | ENSG00000 ALDH1B1  | 10            | Metabolic   | Amino Acid               | 8          | 1.092 | 0.669746878 | 5.41        | 18357   | 17520.9 | 6.73    | 7.39  | High | 1    |      |      |   |
| FALSE | High   | Master Prq Q9N294    | EH domain   | 0      | 15.698  | 10 | 5  | 8  | 4  | 543  | 61.1  | 6.46  | 15.28  | 5  | cell organ; cytoplasm;     | catalytic ac | P00050, 30846    | ENSG00000 HDO2     | 19            | Endocytosi  | Insulin Sign Factors inv | 4          | 1.092 | 0.986358352 | 0.92        | 1913.3  | 1867.5  | 11.41   | 6.41  | High | 1    |      |      |   |
| FALSE | High   | Master Prq Q04941-1  | proteolipid | 0      | 0.5378  | 9  | 1  | 4  | 1  | 152  | 16.7  | 7.24  | 14.22  | 1  | regulation; endoplasm      | protein bi   | P01284, 5355     | ENSG00000 PLP2     | X             |             |                          | 0          | 1.091 | 0.150479644 | 4.82        | 1874.7  | 1675.4  | 4       | 9.27  | High | 1    |      |      |   |
| FALSE | High   | Master Prq Q95168-1  | NADH deH    | 0      | 10.996  | 36 | 4  | 5  | 3  | 129  | 15.2  | 9.85  | 0      | 4  | cell organ; membrane       | catalytic ac | P07225, 4710     | ENSG00000 NDUF8    | 1             | Oxidative E | Electron Tr Complex I    | 13         | 1.091 | 0.156999555 | 6.21        | 236     | 225.7   | 7.89    | 16.07 | High | 1    |      |   |
| FALSE | High   | Master Prq P09622    | Dihydrolip  | 0      | 107.396 | 40 | 14 | 45 | 14 | 509  | 54.1  | 7.85  | 119.85 | 14 | cellular ho                | mitochond    | catalytic ac     | P00070, F 1738     | ENSG00000 DLD | 7           | Metabolic                | Fatty Acid | 29    | 1.091       | 0.164889044 | 7.16    | 16885.1 | 15928.5 | 5.32  | 2.5  | High | 1    |      |   |
| FALSE | High   | Master Prq Q08945    | FACT comp   | 0      | 58.913  | 19 | 13 | 22 | 13 | 709  | 81    | 6.87  | 51.85  | 13 | metabolic; chromosom       | DNA bindi    | P00505, F 6749   | ENSG00000 SRP1     | 11            | Longevity   | HIV elonga               | 24         | 1.091 | 0.397501766 | 3.74        | 6778.6  | 6383.4  | 2.23    | 6.98  | High | 1    |      |   |
| FALSE | High   | Master Prq Q9Y4C2-1  | TRPM8 ch    | 0.007  | 2.239   | 1  | 1  | 1  | 1  | 921  | 102.1 | 6.54  | 2.28   | 1  | regulation; membrane       | protein bi   | P13402, 9747     | ENSG00000 FAMP115A | 7             |             |                          | 0          | 1.091 | 0.403189646 | 20.03       | 612.5   | 561.2   | 17.48   | 7.94  | High | 1    |      |   |
| FALSE | High   | Master Prq P82932    | 28S riboso  | 0      | 12.525  | 44 | 4  | 5  | 4  | 125  | 14.2  | 9.26  | 6.78   | 4  | cell organ; membrane       | protein bi   | P01250, 64968    | ENSG00000 MRP56    | 21            | Ribosome    | Mitochond                | 7          | 1.091 | 0.407752718 | 19.23       | 961     | 925.7   | 35.59   | 9.43  | High | 1    |      |   |
| FALSE | High   | Master Prq Q0UVK1    | Chondroit   | 0      | 37.488  | 5  | 8  | 11 | 8  | 2322 | 250.4 | 5.47  | 22.94  | 8  | cell differe; cell surface | protein bi   | P00054, F 1464   | ENSG00000 CSPG4    | 15            |             | Spinal Cord A tetrasac   | 19         | 1.091 | 0.462431606 | 26.86       | 1098.9  | 1007    | 28.54   | 8.53  | High | 1    |   |
| FALSE | Medium | Master Prq Q9NKG0-1  | Centelin C  | 0.02   | 1.612   | 1  | 1  | 2  | 1  | 1405 | 161.5 | 8.15  | 4.98   | 1  | cell organ; cytoplasm;     | protein bi   | P02463, F 54875  | ENSG00000 CNTLN    | 9             |             |                          | 0          | 1.091 | 0.579005653 | 28.65       | 601.6   | 588.2   | 4.05    | 23.28 | High | 1    |      |   |
| FALSE | High   | Master Prq Q15125    | 3-beta-hyd  | 0      | 12.501  | 5  | 1  | 3  | 1  | 230  | 26.3  | 7.9   | 9.8    | 1  | metabolic; endoplasm       | catalytic ac | P05241, 10682    | ENSG00000 EBP      | X             | Metabolic   | Cholesterol              | 8          | 1.091 | 0.899630786 | 0.78        | 703     | 656.4   | 9.01    | 17.65 | High | 1    |      |   |
| FALSE | High   | Master Prq Q09168-1  | HLA class I | 0      | 117.398 | 36 | 11 | 38 | 2  | 365  | 40.9  | 6.7   | 104.9  | 11 | regulation; cell surface   | protein bi   | P00129, F 3105   | ENSG00000 HLA-A    | 6             | Proteasom   | Interferon               | 14         | 1.09  | 0.399528745 | 22.06       | 235.1   | 212.9   | 27.58   | 11.23 | High | 1    |   |
| FALSE | High   | Master Prq Q105027-1 | Protein tra | 0      | 41.564  | 6  | 9  | 16 | 9  | 2179 | 233.4 | 5.63  | 32.09  | 9  | cell organ; cytosol;eni    | protein bi   | P112931, F 9919  | ENSG00000 SEC16A   | 9             |             | COPII (Coa               | 8          | 1.09  | 0.465866703 | 23.26       | 995.4   | 913.2   | 12.77   | 7.96  | High | 1    |   |
| FALSE | High   | Master Prq P55789    | FAD-linked  | 0      | 9.977   | 18 | 2  | 2  | 2  | 205  | 23.4  | 7.62  | 4.38   | 2  | metabolic; cytoplasm;      | catalytic ac | P04777, 2671     | ENSG00000 GFER     | 16            |             | Mitochond                | 2          | 1.09  | 0.497940898 | 29.67       | 420     | 399.8   | 28.21   | 9.48  | High | 1    |   |
| FALSE | High   | Master Prq Q99729-3  | Isomorf 3   | 0      | 131.442 | 54 | 19 | 68 | 17 | 285  | 30.6  | 7.91  | 195.79 | 19 | cell organ; cytoplasm;     | DNA bindi    | P00076, F 3182   | ENSG00000 HNRNPAB  | 5             |             |                          | 2          | 1.09  | 0.629921276 | 3.87        | 17330.7 | 16503.3 | 6.89    | 5.29  | High | 1    |   |
| FALSE | High   | Master Prq P17813    | Endoglin li | 0      | 31.263  | 11 | 6  | 10 | 6  | 658  | 70.5  | 6.61  | 25.66  | 6  | cell differe; cell surface | catalytic ac | P00100, 2022     | ENSG00000 ENG      | 9             |             | Hydrolysis               | 2          | 1.09  | 0.9547117   | 5.78        | 2006.7  | 1886.7  | 9.15    | 8.61  | High | 1    |   |
| FALSE | High   | Master Prq Q02218    | 2-oxogluta  | 0      | 171.861 | 31 | 26 | 44 | 26 | 1023 | 115.9 | 6.86  | 125.15 | 26 | cellular org cytosol;me    | catalytic ac | P00076, F 4967   | ENSG00000 OGDH     | 7             | Protophyal  | TCA Cycle Lysine cata    | 17         | 1.089 | 0.287797457 | 14.2        | 11835.7 | 10724.7 | 5       | 7     | High | 1 |
| FALSE | High   | Master Prq Q9NRR5-1  | Ubiquitin-L | 0      | 16.642  | 9  | 4  | 8  | 2  | 601  | 63.8  | 5.22  | 15.16  | 4  | metabolic; cytoplasm;      | protein bi   | P00040, F 56893  | ENSG00000 UBQLIN4  | 1             | Protein prc |                          | 1          | 1.089 | 0.30156471  | 0.48        | 428.5   | 396.1   | 6.84    | 1.4   | High | 1    |   |
| FALSE | High   | Master Prq Q06737-1  | Putative Ri | 0      | 41.759  | 14 | 8  | 10 | 8  | 977  | 107.1 | 10.08 | 23.28  | 8  | metabolic; membrane        | protein bi   | P00076, F 64783  | ENSG00000 RBM15    | 1             |             |                          | 0          | 1.089 | 0.443203481 | 24.85       | 1581.2  | 1452.3  | 32.26   | 9.31  | High | 1    |   |
| FALSE | High   | Master Prq Q09H50    | Probable A  | 0      | 9.418   | 2  | 2  | 2  | 2  | 1430 | 160.1 | 8.4   | 2.98   | 2  | metabolic; cytoplasm;      | catalytic ac | P00071, F 64848  | ENSG00000 YTHOC2   | 5             |             |                          | 0          | 1.089 | 0.462205236 | 32.36       | 164.4   | 151     | 49.19   | 8.21  | High | 1    |   |
| FALSE | High   | Master Prq Q9BX56    | Nucleolar   | 0.003  | 3.443   | 2  | 1  | 1  | 1  | 441  | 49.4  | 9.91  | 3.33   | 1  | cell division; chromosom   | DNA bindi    | 51203            | ENSG00000 NUSAP1   | 15            |             |                          | 0          | 1.089 | 0.480739719 | 28.81       | 865.4   | 794.6   | 28.38   | 8.75  | High | 1    |   |
| FALSE | High   | Master Prq Q8UI81    | Interferon  | 0      | 16.305  | 11 | 5  | 5  | 5  | 584  | 61.6  | 8.18  | 9.93   | 5  | metabolic; nucleus         | catalytic ac | P00097, F 26145  | ENSG00000 IRF2B1   | 19            |             |                          | 0          | 1.089 | 0.551743078 | 41.76       | 313.1   | 287.5   | 39.06   | 13.38 | High | 1    |   |
| FALSE | High   | Master Prq Q0UI70    | N-acetyl-D  | 0      | 11.12   | 11 | 3  | 3  | 3  | 344  | 37.4  | 6.24  | 4.21   | 3  | metabolic; cytosol         | catalytic ac | P01869, 55577    | ENSG00000 NAGK     | 2             | Metabolic   | Synthesis of             | 8          | 1.089 | 0.553853194 | 42.14       | 366.4   | 339.7   | 40.73   | 13.13 | High | 1    |   |
| FALSE | High   | Master Prq Q09571    | Persulfide  | 0      | 31.882  | 46 | 6  | 9  | 6  | 254  | 27.9  | 6.83  | 30.22  | 6  | metabolic; cytoplasm;      | catalytic ac | P00753, F 23474  | ENSG00000 ETHE1    | 19            | Sulfur met  | Sulfide oxi              | 6          | 1.088 | 0.024181867 | 0.23        | 1167.1  | 1074.7  | 4.13    | 2.12  | High | 1 |
| FALSE | High   | Master Prq Q06A9-1   | Isomorf 1   | 0.006  | 2.352   | 11 | 1  | 1  | 1  | 203  | 23.4  | 6.15  | 2.21   | 1  | cell organ; cytosol;eni    | protein bi   | P05008, F 143187 | ENSG00000 VT1IA    | 10            |             |                          | 0          | 1.088 | 0.070010688 | 0.71        | 239.6   | 221.2   | 6.93    | 12.29 | High | 1 |
| FALSE | High   | Master Prq P36776    | Lon protea  | 0      | 52.412  | 18 | 13 | 18 | 13 | 959  | 106.4 | 6.39  | 30.37  | 13 | cell organ; cytosol;me     | catalytic ac | P00004, F 30606  | ENSG00000 LONP1    | 19            |             |                          | 0          | 1.088 | 0.071490928 | 0.58        | 2888.1  | 2653.4  | 4.97    | 8.06  | High | 1    |   |
| FALSE | High   | Master Prq Q9NYU2-1  | UDP-pluco   | 0      | 67.337  | 12 | 16 | 22 | 16 | 1555 | 177.1 | 5.63  | 49.57  | 16 | metabolic; endoplasm       | catalytic ac | P06427, 56886    | ENSG00000 UGGT1    | 2             | Protein prc | ER Quality               | 7          | 1.088 | 0.113428869 | 6.15        | 3508.7  | 3357.6  | 5.5     | 2.65  | High | 1 |
| FALSE | High   | Master Prq P14116    | Interleukin | 0      | 13.649  | 13 | 3  | 6  | 3  | 193  | 22.3  | 4.67  | 58.7   | 3  | cell comm; cytosol;ext     | protein bi   | P00340, 3606     | ENSG00000 IL18     | 11            | Influenza A | Nucleotide Interleukin   | 25         | 1.088 | 0.233064464 | 11.25       | 920.4   | 806.4   | 5.18    | 7.86  | High | 1 |
| FALSE | High   | Master Prq Q0G273-1  | SRA stem    | 0      | 40.632  | 67 | 6  | 19 | 6  | 109  | 12.3  | 10.24 | 54.5   | 6  | cell organ; cytoplasm;     | protein bi   | P00076, F 81892  | ENSG00000 SURP     | 14            |             |                          | 0          | 1.088 | 0.245371137 | 1.96        | 9182.5  | 8836.3  | 4.32    | 3.71  | High | 1    |   |
| FALSE | High   | Master Prq Q9H488-1  | GDP-fucos   | 0.003  | 3.251   | 3  | 1  | 1  | 1  | 388  | 43.9  | 8.53  | 3.23   | 1  | metabolic; endoplasm       | catalytic ac | P01250, 23509    | ENSG00000 POFU1    | 20            | Other type  | Pre-NOTO                 | 5          | 1.088 | 0.366380073 | 14.47       | 501.9   | 466.7   | 25.1    | 6.94  | High | 1 |
| FALSE | High   | Master Prq Q9NQC3-1  | Isomorf 2   | 0      | 48.57   | 21 | 6  | 17 | 6  | 373  | 40.3  | 4.78  | 49.47  | 6  | cell death; endoplasm      | protein bi   | P02453, 57142    | ENSG00000 RTN4     | 2             |             | Spinal Cord              | 1          | 1.088 | 0.567349654 | 10.87       | 6394.7  | 5891.3  | 2.1     | 10.49 | High | 1 |
| FALSE | High   | Master Prq P07866    | Beta-hexo   | 0      | 13.601  | 8  | 4  | 4  | 4  | 556  | 63.1  |       |        |    |                            |              |                  |                    |               |             |                          |            |       |             |             |         |         |         |       |      |      |      |      |      |      |      |      |      |      |   |

|       |      |                     |              |       |         |    |    |    |    |      |       |       |        |    |                                      |                   |            |              |           |             |             |             |             |             |             |             |         |         |         |       |       |      |      |      |      |      |      |      |   |
|-------|------|---------------------|--------------|-------|---------|----|----|----|----|------|-------|-------|--------|----|--------------------------------------|-------------------|------------|--------------|-----------|-------------|-------------|-------------|-------------|-------------|-------------|-------------|---------|---------|---------|-------|-------|------|------|------|------|------|------|------|---|
| FALSE | High | Master Prq Q9H4K7   | Mitochondr   | 0     | 7.182   | 5  | 2  | 3  | 2  | 406  | 43.9  | 9.45  | 4.24   | 2  | metabolic; membrane catalytic a      | P00025, P 26164   | ENSG000001 | GTPBP5; N 20 |           |             |             |             |             | 0           | 1.082       | 0.524699683 | 24.15   | 1009.5  | 933.2   | 9.56  | 7.85  | High | 1 |
| FALSE | High | Master Prq P00040-1 | Endoplasm    | 0     | 86.356  | 53 | 14 | 42 | 14 | 261  | 29    | 7.31  | 90.79  | 14 | metabolic; cell surface catalytic a  | P070479, F 10961  | ENSG000001 | ERP29        | 12        | Protein prc |             |             |             | 1           | 1.082       | 0.568462363 | 18.33   | 11963.5 | 11055.6 | 12.35 | 2.78  | High | High | High | High | High | High | 1    |   |
| FALSE | High | Master Prq P12004   | Neural cell  | 0     | 68.627  | 15 | 16 | 23 | 16 | 1257 | 139.9 | 6.24  | 45.28  | 16 | cell differe cell surface protein br | P000041, F 3897   | ENSG000001 | LCAM         | 1         | Cell adhesi | Basigin int |             | 11          | 1.082       | 0.13976742  | 2.54        | 7220    | 6677.4  | 5.88    | 1.62  | High  | High | High | High | High | High | 1    |      |   |
| FALSE | High | Master Prq P98008   | Mucin-SAC    | 0     | 10.99   | 1  | 4  | 4  | 4  | 5654 | 585.2 | 7.02  | 6.26   | 4  | metabolic; cytoplasm; protein br     | P000094, F 4586   | ENSG000001 | MUC5AC       | 11; CHR_H | Defective c |             | 15          | 1.081       | 0.306660037 | 9.57        | 267         | 247     | 23.21   | 6.14    | High  | High  | High | High | High | High | 1    |      |      |   |
| FALSE | High | Master Prq P00390   | Glutathion   | 0     | 24.439  | 13 | 4  | 7  | 4  | 522  | 562   | 8.5   | 12.94  | 4  | cellular ho cytoplasm; antioxidant   | P000070, F 2936   | ENSG000001 | GSR          | 8         | Glutathion  | Glutathion  | Detoxificat | 13          | 1.081       | 0.479690747 | 28.01       | 1283.1  | 1246.4  | 34.86   | 8.6   | High  | High | High | High | High | High | 1    |      |   |
| FALSE | High | Master Prq Q5V752   | Regulation   | 0     | 12.441  | 4  | 3  | 4  | 3  | 1461 | 155.9 | 7.42  | 7.25   | 3  | metabolic; cytoplasm; catalytic a    | P04018, F 23248   | ENSG000001 | PPR02        | 1         |             | RNA polye   |             | 3           | 1.081       | 0.495808069 | 40.5        | 935.2   | 935.2   | 60.63   | 9.43  | High  | High | High | High | High | High | 1    |      |   |
| FALSE | High | Master Prq Q60318   | Germinall    | 0.004 | 2.793   | 1  | 1  | 1  | 1  | 1980 | 218.8 | 6.39  | 3.38   | 1  | transport; cytoplasm; catalytic a    | P03999, F 8888    | ENSG000001 | MCN3AP       | 21        |             |             |             | 0           | 1.081       | 0.949066538 | 6.76        | 333.3   | 340.7   | 17.23   | 6.52  | High  | High | High | High | High | High | 1    |      |   |
| FALSE | High | Master Prq Q9V935   | Acyl-coen    | 0     | 24.639  | 16 | 7  | 15 | 7  | 439  | 49.9  | 8.6   | 35.25  | 7  | metabolic; mitochondr catalytic a    | P03061, F 23597   | ENSG000001 | ACOT9        | X         |             | Mitochondr  |             | 4           | 1.081       | 0.971356255 | 13.33       | 4981.3  | 4744.3  | 22      | 1.92  | High  | High | High | High | High | High | 1    |      |   |
| FALSE | High | Master Prq P06730   | Eukaryotic   | 0     | 8.341   | 10 | 2  | 4  | 2  | 217  | 25.1  | 6.15  | 8.48   | 2  | defense re cytoplasm; protein br     | P01652, F 1977    | ENSG000001 | EIF4E        | 4         | HIF-1 signa | Translatior | SG15 anti   | 45          | 1.08        | 0.056426775 | 3.5         | 718.2   | 680.9   | 4.49    | 7.22  | High  | High | High | High | High | High | 1    |      |   |
| FALSE | High | Master Prq P06831   | PRA1 fami    | 0     | 13.542  | 16 | 2  | 3  | 2  | 178  | 19.2  | 9.19  | 7.58   | 2  | transport; endosome                  | P01308, F 11230   | ENSG000001 | GRAM7        | X         |             |             |             | 0           | 1.08        | 0.579153542 | 9.33        | 2118.1  | 1970.7  | 5.17    | 6.66  | High  | High | High | High | High | High | 1    |      |   |
| FALSE | High | Master Prq P63172   | Dynein lig   | 0     | 6.319   | 16 | 1  | 1  | 1  | 113  | 12.4  | 5.08  | 6.12   | 1  | cell divisio cytoplasm; catalytic a  | P03645, F 6993    | ENSG000001 | DYNL1T       | 6         |             | Neutrophil  |             | 3           | 1.08        | 0.715833522 | 42.66       | 107     | 98      | 23.48   | 7.76  | High  | High | High | High | High | High | 1    |      |   |
| FALSE | High | Master Prq Q04724   | Transducir   | 0     | 27.025  | 7  | 3  | 4  | 1  | 770  | 83.1  | 7.24  | 11.7   | 3  | developm cytosol;nu protein br       | P00400, F 7088    | ENSG000001 | TLE1         | 9         |             | Notch Sign  | NOTCH1 ir   | 11          | 1.08        | 0.872209052 | 25.26       | 430.6   | 398.7   | 28.74   | 8.24  | High  | High | High | High | High | High | 1    |      |   |
| FALSE | High | Master Prq Q99638   | cell cycle c | 0     | 5.924   | 6  | 1  | 1  | 1  | 391  | 42.5  | 5.66  | 3.01   | 1  | metabolic; cytoplasm; catalytic a    | P04139, F 5883    | ENSG000001 | RAD9A        | 11        |             | Androgen    | G2/M DNA    | 26          | 1.08        | 0.940377755 | 24.39       | 123.3   | 119.2   | 22.44   | 11.78 | High  | High | High | High | High | High | 1    |      |   |
| FALSE | High | Master Prq Q96IR7   | 4-hydroxy    | 0     | 16.292  | 11 | 3  | 4  | 3  | 371  | 39.4  | 7.03  | 13.71  | 3  | metabolic; cytoplasm; catalytic a    | P112681, F 84842  | ENSG000001 | HPDL         | 0         |             |             |             | 0           | 1.079       | 0.035367946 | 2.02        | 2727.1  | 2516.4  | 2.88    | 5.37  | High  | High | High | High | High | High | 1    |      |   |
| FALSE | High | Master Prq P62140   | Serine/thr   | 0     | 76.16   | 53 | 14 | 27 | 4  | 327  | 37.2  | 6.19  | 91.2   | 14 | cell divisio cytoplasm; catalytic a  | P00149, F 5500    | ENSG000001 | PP1CB        | 2         | Insulin sig | Common P    | Triglycerid | 43          | 1.079       | 0.337822024 | 6.43        | 2127    | 2082.3  | 5.76    | 5.76  | High  | High | High | High | High | High | 1    |      |   |
| FALSE | High | Master Prq P13984   | General tr   | 0     | 4.839   | 13 | 2  | 2  | 2  | 249  | 28.4  | 9.23  | 2.81   | 2  | metabolic; cytoskelet catalytic a    | P002270, F 2963   | ENSG000001 | GTZF2F       | 13        | Basal trans | Eukaryotic  | Signaling b | 56          | 1.079       | 0.358892973 | 15.27       | 530.8   | 496.7   | 2.35    | 15.5  | High  | High | High | High | High | High | 1    |      |   |
| FALSE | High | Master Prq Q15631-1 | Translin [c  | 0     | 29.58   | 33 | 8  | 12 | 8  | 228  | 26.2  | 6.44  | 31.18  | 8  | metabolic; cytoplasm; catalytic a    | P01997, F 7247    | ENSG000001 | TSN          | 2         |             | Small inter |             | 3           | 1.079       | 0.47067636  | 2.07        | 5340.5  | 5270.7  | 5.31    | 5.13  | High  | High | High | High | High | High | 1    |      |   |
| FALSE | High | Master Prq Q00169   | Phosphati    | 0     | 9.289   | 16 | 3  | 4  | 2  | 270  | 31.8  | 6.55  | 4.2    | 3  | cell organi cytoplasm; transport     | P002121, F 5306   | ENSG000001 | PITPNA       | 17        |             | Gene and    |             | 9           | 1.079       | 0.555172261 | 50.5        | 168.2   | 171.1   | 59.67   | 15.98 | High  | High | High | High | High | High | 1    |      |   |
| FALSE | High | Master Prq P12004   | proliferati  | 0     | 101.689 | 50 | 11 | 39 | 11 | 261  | 28.8  | 4.69  | 116.79 | 11 | cell differe nucleus catalytic a     | P00705, F 5111    | ENSG000001 | PCNA         | 20        | HTLV-1 infe | Cell Cycle  | Translatio  | 80          | 1.079       | 0.604705403 | 1.05        | 13122.4 | 12077.4 | 9.13    | 0.87  | High  | High | High | High | High | High | 1    |      |   |
| FALSE | High | Master Prq Q15526   | Surfeit lo   | 0     | 10.139  | 9  | 1  | 1  | 1  | 300  | 33.3  | 9.6   | 5.18   | 1  | cell organi membrane catalytic a     | P002104, F 6834   | ENSG000001 | SURF1        | 9; CHR_H  | Electron Tr | TP53 Regu   | 11          | 1.079       | 0.975866396 | 26          | 146.8       | 136     | 17.36   | 10.67   | High  | High  | High | High | High | High | 1    |      |      |   |
| FALSE | High | Master Prq P09493-3 | Isomorf 3    | 0     | 59.065  | 38 | 16 | 32 | 3  | 284  | 32.9  | 4.78  | 49.22  | 16 | cell organi cytoplasm; protein br    | P00261, F 7168    | ENSG000001 | TPM1         | 15        |             | Striated M  |             | 1           | 1.078       | 0.09159197  | 1.26        | 2415.9  | 2256.4  | 1.79    | 4.54  | High  | High | High | High | High | High | 1    |      |   |
| FALSE | High | Master Prq Q13310-3 | Isomorf 3    | 0     | 133.138 | 30 | 22 | 54 | 11 | 660  | 72.3  | 9.35  | 148.45 | 22 | coagulation cytoplasm; protein br    | P00076, F 8761    | ENSG000001 | PABPC4       | 0         |             |             |             | 0           | 1.078       | 0.210507686 | 9.09        | 3947.7  | 3533.8  | 2.34    | 9.15  | High  | High | High | High | High | High | 1    |      |   |
| FALSE | High | Master Prq Q8WT72   | Nucleoel     | 0     | 16.355  | 7  | 4  | 6  | 4  | 800  | 92.5  | 9.17  | 16.23  | 4  | cell differe mitochondr RNA bindi    | P00314, F 64138   | ENSG000001 | NOC1L        | 10        |             |             |             | 0           | 1.078       | 0.237691348 | 6.38        | 1395.3  | 1252.9  | 11.01   | 2.69  | High  | High | High | High | High | High | 1    |      |   |
| FALSE | High | Master Prq Q14802   | DNA-direc    | 0     | 8.817   | 4  | 3  | 3  | 3  | 1390 | 155.5 | 8.48  | 5.97   | 3  | 3 defense re cytosol;nu catalytic a  | P00623, F 11128   | ENSG000001 | POLR3A       | 10        |             | Purine met  | RNA Poly    | 18          | 1.078       | 0.239629794 | 7.58        | 307.3   | 285.1   | 26.17   | 10.22 | High  | High | High | High | High | High | 1    |      |   |
| FALSE | High | Master Prq Q08170   | Serine/arg   | 0     | 26.787  | 15 | 8  | 12 | 4  | 494  | 56.6  | 11.52 | 17.97  | 8  | metabolic; nucleus protein br        | P00076, F 6429    | ENSG000001 | SRSF4        | 1         |             | Spliceosom  | mRNA Pro    | Cleavage o  | 14          | 1.078       | 0.169136139 | 10.21   | 1546.4  | 1367.4  | 32.1  | 9.04  | High | High | High | High | High | High | 1    |   |
| FALSE | High | Master Prq Q92974   | Rho guanin   | 0     | 10.821  | 4  | 4  | 6  | 4  | 986  | 111.5 | 7.27  | 6.76   | 4  | cell divisio cytoplasm; metal ion    | P000130, F 9181   | ENSG000001 | ARHGGEF      | 1         |             | Pathogeni   | Pathogeni   | G alpha 1   | 13          | 1.078       | 0.405826868 | 16.93   | 1125.9  | 1003.3  | 4.34  | 12.48 | High | High | High | High | High | High | 1    |   |
| FALSE | High | Master Prq Q8BKT5   | RNA-bindi    | 0     | 4.904   | 2  | 2  | 2  | 2  | 1001 | 118   | 6.81  | 2.22   | 2  | protein br                           | P00076, F 389677  | ENSG000001 | RAM12B       | 8         |             |             |             | 0           | 1.078       | 0.530609728 | 38.22       | 608.4   | 657.3   | 47.49   | 9.83  | High  | High | High | High | High | High | 1    |      |   |
| FALSE | High | Master Prq Q9Y4E1   | WASH cor     | 0     | 16.882  | 4  | 3  | 3  | 3  | 1318 | 144.6 | 4.79  | 6.88   | 3  | 3 regulation cytosol;eni protein br  | P115255, F 253725 | ENSG000001 | FAM121C, V   | 10        | Endocytos   |             |             | 1           | 1.078       | 0.570655979 | 39.88       | 776.4   | 793.2   | 39.92   | 8.04  | High  | High | High | High | High | High | 1    |      |   |
| FALSE | High | Master Prq Q92879   | CUGBP El     | 0     | 46.189  | 11 | 5  | 11 | 5  | 486  | 52    | 8.46  | 32.89  | 5  | cell organi cytoplasm; protein br    | P00076, F 10658   | ENSG000001 | CLF1         | 11        |             | Adipogene   |             | 2           | 1.078       | 0.643962249 | 21.97       | 4654.2  | 4317.8  | 15.96   | 1.98  | High  | High | High | High | High | High | 1    |      |   |
| FALSE | High | Master Prq Q96H79   | Zinc finger  | 0     | 17.579  | 14 | 3  | 3  | 3  | 300  | 32.9  | 8.13  | 10.41  | 3  | 3 cytosol metal ion                  | 92092             | ENSG000001 | ZC3HAV1      | 7         |             |             |             | 0           | 1.078       | 0.718410508 | 25.06       | 1685.9  | 1373.3  | 15.17   | 27.51 | High  | High | High | High | High | High | 1    |      |   |
| FALSE | High | Master Prq P49406   | 39S riboso   | 0     | 15.081  | 20 | 4  | 4  | 4  | 292  | 33.5  | 9.5   | 8.25   | 4  | cell organi membrane structural      | P01245, F 9801    | ENSG000001 | MRPL19       | 2         |             | Ribosome    | Cytoplasm   | Mitochondr  | 8           | 1.078       | 0.790402254 | 6.09    | 286.2   | 264.2   | 5.01  | 13.39 | High | High | High | High | High | High | 1    |   |
| FALSE | High | Master Prq P47914   | 60S riboso   | 0     | 37.403  | 30 | 6  | 19 | 6  | 159  | 17.7  | 11.66 | 39.77  | 6  | cell organi cytosol;nu protein br    | P017179, F 6159   | ENSG000001 | RP129        | 3         |             | Ribosome    | Cytoplasm   | Peptide ch  | 34          | 1.077       | 0.16217416  | 5.42    | 6448.9  | 5974    | 3.06  | 11.13 | High | High | High | High | High | High | 1    |   |
| FALSE | High | Master Prq Q9Y265   | RuvB-like 1  | 0     | 78.962  | 35 | 11 | 22 | 11 | 456  | 50.2  | 6.42  | 7.6    | 11 | cell divisio cytoplasm; catalytic a  | P00004, F 8607    | ENSG000001 | XR82         | 3         |             | Wnt signal  | Gastric Car | Ub-specific | 25          | 1.077       | 0.199305713 | 2.69    | 8400.9  | 8001.8  | 4.09  | 1.93  | High | High | High | High | High | High | 1    |   |
| FALSE | High | Master Prq P51116   | Fragile X n  | 0     | 30.91   | 12 | 7  | 10 | 5  | 673  | 74.2  | 6.32  | 27.01  | 7  | 7 regulation cytoplasm; protein br   | P00013, F 9513    | ENSG000001 | FMR1         | 17        |             | RNA trans   |             | 1           | 1.077       | 0.23915268  | 7.57        | 2052.6  | 1906.2  | 15.2    | 4.81  | High  | High | High | High | High | High | 1    |      |   |
| FALSE | High | Master Prq Q6PU02   | Neutral ch   | 0     | 7.373   | 6  | 2  | 3  | 2  | 408  | 45.8  | 7.23  | 10.85  | 2  | metabolic; endoplasm catalytic a     | P00135, F 57552   | ENSG000001 | NCEH1        | 1         |             | Bile secret |             | 5           | 1.077       | 0.253186644 | 8.87        | 575.7   | 523.1   | 10.67   | 1.52  | High  | High | High | High | High | High | 1    |      |   |
| FALSE | High | Master Prq Q43395   | U4/U6 sm     | 0     | 21.863  | 12 | 8  | 10 | 8  | 683  | 77.5  | 9.5   | 17.34  | 8  | cell organi cytosol;nu protein br    | P010480, F 9129   | ENSG000001 | PRPF3        | 1         |             | Spliceosom  | mRNA Pro    | mRNA Spli   | 6           | 1.077       | 0.476334717 | 26.68   | 2397.2  | 2226.1  | 27.57 | 6.04  | High | High | High | High | High | High | 1    |   |
| FALSE | High | Master Prq Q92597   | Protein NC   | 0     | 27.729  | 14 | 3  | 4  | 3  | 394  | 42.8  | 5.82  | 12.67  | 3  | cell organi cytoplasm; protein br    | P00561, F 10397   | ENSG000001 | NRDGL1       | 6         |             | VEGA-VEE    | TP53 regul  | 7           | 1.077       | 0.510525998 | 10.75       | 959.6   | 1028.4  | 14.37   | 10.13 | High  | High | High | High | High | High | 1    |      |   |
| FALSE | High | Master Prq Q8N3U4-1 | Cohesin su   | 0     | 20.086  | 5  | 4  | 5  | 4  | 1231 | 141.2 | 5.43  | 12.28  | 4  | cell divisio chromosor protein br    | P000670, F 10735  | ENSG000001 | STAG2        | X         | Cell cycle  | Meiotic sy  |             | 21          | 1.077       | 0.515497112 | 45.57       | 406.8   | 377.7   | 61.3    | 16.59 | High  | High | High | High | High | High | 1    |      |   |
| FALSE | High | Master Prq Q105504  | nucleosori   | 0.003 | 3.2     | 3  | 1  | 1  | 1  |      |       |       |        |    |                                      |                   |            |              |           |             |             |             |             |             |             |             |         |         |         |       |       |      |      |      |      |      |      |      |   |

|       |      |            |          |                 |       |         |    |    |    |    |      |       |      |        |    |              |                        |            |        |            |            |            |            |                        |              |             |             |             |             |             |         |         |        |      |      |      |      |      |      |      |      |      |      |   |
|-------|------|------------|----------|-----------------|-------|---------|----|----|----|----|------|-------|------|--------|----|--------------|------------------------|------------|--------|------------|------------|------------|------------|------------------------|--------------|-------------|-------------|-------------|-------------|-------------|---------|---------|--------|------|------|------|------|------|------|------|------|------|------|---|
| FALSE | High | Master Prq | P36542-1 | ATP synth       | 0     | 62.529  | 37 | 11 | 33 | 11 | 298  | 33    | 9.22 | 51.43  | 11 | cell organ   | membrane catalytic     | at         | P00231 | 509        | ENSG000001 | ATP5CL     | 10         | Huntington Electron Tr | Cristate for | 13          | 1.072       | 0.963544739 | 10.14       | 10410.1     | 10036.9 | 17.8    | 1.98   | High | 1    |      |   |
| FALSE | High | Master Prq | Q94874-1 | E3 UFM1-<br>c   | 0     | 15.299  | 10 | 7  | 9  | 7  | 794  | 89.5  | 6.79 | 13.6   | 7  | cell differe | cytoplasm; catalytic   | at         | P09743 | 23376      | ENSG000001 | UFL1       | 6          | Antigen pr             |              | 4           | 1.071       | 0.038765397 | 1.09        | 2344.4      | 2204.7  | 4.3     | 2.15   | High | 1    |      |   |
| FALSE | High | Master Prq | Q09446   | Golgi phos      | 0     | 30.413  | 23 | 6  | 7  | 6  | 298  | 33.8  | 6.44 | 23.94  | 6  | cell organ   | cytosol;eni            | protein bi | P05719 | 64083      | ENSG000001 | GOLPH3     | 5          | Transcripti            |              | 1           | 1.071       | 0.139664771 | 2.92        | 3143.6      | 2993.5  | 8.11    | 2.79   | High | 1    |      |   |
| FALSE | High | Master Prq | P05556-1 | Integrin be     | 0     | 115.766 | 27 | 18 | 47 | 18 | 798  | 88.4  | 5.39 | 132.34 | 18 | cell differe | cell surface enzyme re | at         | P00084 | 3688       | ENSG000001 | TG61       | 10         | Arrhythm               | Integrin-m   | Integrin ce | 74          | 1.071       | 0.155914848 | 6.29        | 19419.5 | 18014.9 | 1.42   | 5.34 | High | 1    |   |
| FALSE | High | Master Prq | P15529-2 | Isolform B      | 0     | 42.207  | 18 | 9  | 20 | 9  | 399  | 44.2  | 6.39 | 43.35  | 9  | defence re   | cell surface catalytic | at         | P00084 | 4179       | ENSG000001 | CD46       | 1          | Complexe               |              | 1           | 1.071       | 0.229795741 | 0.28        | 7306.5      | 6961.5  | 1.75    | 4.67   | High | 1    |      |   |
| FALSE | High | Master Prq | Q08709   | Protein cal     | 0     | 4.732   | 6  | 2  | 2  | 2  | 278  | 30.7  | 5.49 | 4.83   | 2  | defence re   | endoplasm              | protein bi | P11938 | 10695      | ENSG000001 | CNPY3      | 6          | Trafficking            |              | 4           | 1.071       | 0.420009664 | 17.58       | 626.8       | 585.3   | 39.17   | 12.54  | High | 1    |      |   |
| FALSE | High | Master Prq | Q60115-1 | Pre-mRNA        | 0     | 10.566  | 7  | 3  | 3  | 3  | 594  | 66.5  | 5.59 | 5.9    | 3  | metabolic    | nucleus                | protein bi | P05182 | 81608      | ENSG000001 | PP1L1      | 6          | mRNA sur               | mRNA 3'-e    | 15          | 1.071       | 0.469835818 | 55.8        | 195.3       | 182.4   | 111.21  | 30.32  | High | 1    |      |   |
| FALSE | High | Master Prq | Q08C22-1 | Temin-3 [C      | 0     | 40.832  | 7  | 6  | 8  | 6  | 1445 | 155.2 | 6.81 | 26.56  | 6  | cellular co  | cytosol                | protein bi | P00017 | 64759      | ENSG000001 | TNE3       | 7          | MET inter              |              | 5           | 1.071       | 0.528279968 | 23.54       | 2168.3      | 1935.7  | 13.01   | 14.47  | High | 1    |      |   |
| FALSE | High | Master Prq | Q15564-1 | thyroid re      | 0     | 30.978  | 18 | 5  | 7  | 5  | 476  | 50.3  | 7.37 | 24.19  | 5  | cell organ   | cytoplasm; metal ion   | at         | P00412 | 7205       | ENSG000001 | TRIP6      | 7          | NOD-like r             |              | 1           | 1.071       | 0.637856161 | 17.84       | 1341.1      | 1251.7  | 21.05   | 5.43   | High | 1    |      |   |
| FALSE | High | Master Prq | Q14318-2 | Isolform 2      | 0     | 14.025  | 10 | 4  | 5  | 4  | 413  | 44.6  | 4.84 | 8.9    | 4  | cell death;  | cytoplasm; catalytic   | at         | P00254 | 23770      | ENSG000001 | KFBP8      | 19         | Senescenc              |              | 1           | 1.071       | 0.728458886 | 7.81        | 418.1       | 390.4   | 4.22    | 7.58   | High | 1    |      |   |
| FALSE | High | Master Prq | Q9H299   | Sodium-co       | 0     | 7.971   | 6  | 3  | 4  | 3  | 487  | 54    | 7.02 | 5.15   | 3  | transport    | membrane               | protein bi | P01490 | 81539      | ENSG000001 | SLC38A1    | 12         | GABAergic              | Synaptic V   | Amino acid  | 11          | 1.07        | 0.06087674  | 3.17        | 377.3   | 349.5   | 10.02  | 7.86 | High | 1    |   |
| FALSE | High | Master Prq | Q13421   | mesotheli       | 0     | 12.529  | 9  | 5  | 6  | 5  | 630  | 68.9  | 6.38 | 8.95   | 5  | metabolic    | cell surface           | protein bi | P06060 | 10232      | ENSG000001 | MSLN       | 16         | Post-transl            |              | 0           | 1.07        | 0.064573416 | 3.93        | 838.5       | 791.8   | 4.72    | 3.94   | High | 1    |      |   |
| FALSE | High | Master Prq | Q13283   | Ras GTPas       | 0     | 61.753  | 32 | 9  | 18 | 9  | 466  | 52.1  | 5.52 | 61.9   | 9  | metabolic    | cytoplasm; catalytic   | at         | P00076 | 10146      | ENSG000001 | G3BP1      | 5          |                        |              | 0           | 1.07        | 0.088346638 | 3.21        | 4775.7      | 4662.1  | 3.13    | 4.02   | High | 1    |      |   |
| FALSE | High | Master Prq | P51659-1 | peroxisom       | 0     | 113.656 | 32 | 18 | 28 | 18 | 736  | 79.6  | 8.84 | 85.75  | 18 | cell differe | membrane catalytic     | at         | P00106 | 73295      | ENSG000001 | HSD17B4    | 5          | Peroxisom              | Steroid Bi   | Beta-oxida  | 16          | 1.07        | 0.195164069 | 6.89        | 7928.3  | 7864.9  | 12.03  | 8.05 | High | 1    |   |
| FALSE | High | Master Prq | Q9BTV4   | Transmem        | 0     | 18.541  | 14 | 5  | 9  | 5  | 400  | 44.8  | 8.13 | 18.31  | 5  | cell organ   | endoplasm              | protein bi | P07787 | 79188      | ENSG000001 | TMEM43     | 1          |                        |              | 0           | 1.07        | 0.211864586 | 1.16        | 1195.3      | 1117    | 8.75    | 4.58   | High | 1    |      |   |
| FALSE | High | Master Prq | Q9247-1  | Glutaryl-Co     | 0     | 42.199  | 8  | 11 | 13 | 11 | 1726 | 198.9 | 4.91 | 30.39  | 11 | cell organ   | nucleus                | DNA bindi  | P00017 | 76830      | ENSG000001 | SUPT6H     | 17         |                        | Formation    |             | 5           | 1.07        | 0.27894746  | 5.33        | 2326.5  | 2215.2  | 18.53  | 3.49 | High | 1    |   |
| FALSE | High | Master Prq | Q92947-1 | GRAP1-<br>assoc | 0     | 17.408  | 9  | 2  | 3  | 2  | 438  | 48.1  | 8.06 | 15.68  | 2  | metabolic;   | mitochondr             | catalytic  | at     | P00441     | 7639       | ENSG000001 | GCDH       | 19                     | Lysine deg   | Fatty Acid  | Lysine cata | 10          | 1.07        | 0.328236682 | 9.04    | 1236.1  | 1230.5 | 20.6 | 5.29 | High | 1 |
| FALSE | High | Master Prq | P41328   | GRIP1-<br>assoc | 0     | 5.799   | 2  | 2  | 2  | 2  | 841  | 95.9  | 5.11 | 4.2    | 2  | transport    | cytosol;eni            | protein bi | Q9V3P1 | X          |            |            |            |                        | 0            | 1.07        | 0.483484762 | 18.88       | 858.2       | 770         | 8.59    | 10.58   | High   | High | High | High | High | High | High | High | 1    |      |      |   |
| FALSE | High | Master Prq | P15130-3 | Isolform 3      | 0     | 59.295  | 25 | 14 | 20 | 14 | 637  | 68.7  | 5.33 | 49.15  | 14 | cell organ   | cytosol                | catalytic  | at     | P00009     | 2935       | ENSG000001 | GSP1       | 16                     |              |             | 0           | 1.07        | 0.519305276 | 24.59       | 7644.4  | 7462.5  | 20.8   | 6.18 | High | 1    |   |
| FALSE | High | Master Prq | Q15213   | WD repeat       | 0     | 6.163   | 2  | 1  | 1  | 1  | 610  | 68    | 9.67 | 3.32   | 1  | metabolic    | nucleus                | protein bi | P00400 | 9277       | ENSG000001 | WDR46      | 4          |                        |              | 5           | 1.07        | 0.78477032  | 30.64       | 277.8       | 265.4   | 15.61   | 10.08  | High | 1    |      |   |
| FALSE | High | Master Prq | P12270   | Nucleopor       | 0     | 292.356 | 32 | 62 | 94 | 62 | 2363 | 267.1 | 5.02 | 226.58 | 62 | cell divisi  | chromosom              | catalytic  | at     | P00038     | 71175      | ENSG000001 | TPR        | 1                      | RNA trans    |             | 69          | 1.069       | 0.036550045 | 0.97        | 25602.1 | 24105.2 | 4.57   | 2.86 | High | 1    |   |
| FALSE | High | Master Prq | P62834   | ras-related     | 0     | 63.548  | 61 | 10 | 24 | 3  | 184  | 21    | 6.67 | 6.39   | 10 | cell organ   | cytoplasm; catalytic   | at         | P00009 | 5906       | ENSG000001 | RAP1A      | 1          | Renal cell             | Integrin-m   | Signaling b | 67          | 1.069       | 0.28896404  | 0.13        | 1460.6  | 1378.1  | 6.5    | 2.94 | High | 1    |   |
| FALSE | High | Master Prq | Q04206   | Transcript      | 0     | 21.81   | 9  | 4  | 6  | 4  | 551  | 60.2  | 5.68 | 14.75  | 4  | defence re   | cytoplasm; DNA bindi   | P00554     | 5970   | ENSG000001 | RELA       | 11         | Epstein-Ba | Androgen               | C/EBTA/Int   | 153         | 1.069       | 0.445595042 | 16.82       | 1048.9      | 981.5   | 6.27    | 5.82   | High | 1    |      |   |
| FALSE | High | Master Prq | Q095721  | Synaptosom      | 0     | 10.549  | 12 | 2  | 2  | 2  | 258  | 29    | 5.81 | 6.73   | 2  | cell organ   | cytoplasm; protein bi  | P00835     | 9342   | ENSG000001 | SNAP29     | 22         | SNARE int  | Intra-Golgi            |              | 8           | 1.069       | 0.494228433 | 37.79       | 47.7        | 44.6    | 57.66   | 13.37  | High | 1    |      |   |
| FALSE | High | Master Prq | Q095372  | acyl-prote      | 0     | 24.111  | 31 | 5  | 6  | 5  | 231  | 24.7  | 7.23 | 19.15  | 5  | cellular co  | cytoplasm; catalytic   | at         | P00561 | 71133      | ENSG000001 | LYPLA2     | 4          | Glyceroph              |              | 4           | 1.069       | 0.536931188 | 23.48       | 704.6       | 648.7   | 12.13   | 12.62  | High | 1    |      |   |
| FALSE | High | Master Prq | Q093N1   | Thioredoxin     | 0     | 21.915  | 19 | 5  | 6  | 5  | 280  | 31.8  | 4.98 | 10.55  | 5  | cellular ho  | endoplasm catalytic    | at         | P00805 | 81542      | ENSG000001 | TMX1       | 14         |                        |              | 0           | 1.069       | 0.554053068 | 15.97       | 2268.9      | 2225.2  | 12.69   | 2.96   | High | 1    |      |   |
| FALSE | High | Master Prq | P78406   | mRNA exp        | 0     | 78.589  | 38 | 10 | 19 | 10 | 368  | 40.9  | 7.83 | 65.09  | 10 | cell divisi  | cytoplasm; protein bi  | P00400     | 8480   | ENSG000001 | RAE1       | 20         | RNA trans  |                        | 65           | 1.069       | 0.897820512 | 2.26        | 4135.5      | 3960.1      | 9.5     | 2.43    | High   | High | High | High | High | High | High | High | 1    |      |      |   |
| FALSE | High | Master Prq | Q946A6   | Synapse-ai      | 0     | 21.159  | 17 | 4  | 5  | 4  | 352  | 39.9  | 4.53 | 15.63  | 4  | cytosol;Go   | protein bi             | P03099     | 94056  | ENSG000001 | SYAP1      | X          |            |                        | 0            | 1.068       | 0.73610847  | 3.65        | 1704.4      | 1581.6      | 1.53    | 26.33   | High   | High | High | High | High | High | High | High | 1    |      |      |   |
| FALSE | High | Master Prq | Q9NR92   | COX assem       | 0.001 | 4.236   | 20 | 2  | 6  | 2  | 79   | 9.5   | 7.87 | 10.2   | 2  | mitochond    |                        | P08583     | 56942  | ENSG000001 | CSMC2      | 16         |            |                        | 2            | 1.068       | 0.077940422 | 1.51        | 1657.7      | 1466.8      | 4.22    | 4.54    | High   | High | High | High | High | High | High | High | 1    |      |      |   |
| FALSE | High | Master Prq | Q09Y49   | U6 snRNA        | 0     | 9.01    | 32 | 2  | 3  | 2  | 91   | 9.9   | 4.54 | 8.18   | 2  | metabolic    | cytosol;nu             | protein bi | P01423 | 23658      | ENSG000001 | LSM2       | 7          | RNA degra              | mRNA Spli    |             | 8           | 1.068       | 0.995843928 | 2.19        | 3346.3  | 3134.6  | 2.97   | 0.19 | High | 1    |   |
| FALSE | High | Master Prq | Q08X29   | Lipolysis-st    | 0     | 10.943  | 6  | 3  | 3  | 3  | 649  | 71.4  | 7.97 | 3.34   | 3  | regulation   | membrane               |            | P00070 | 51599      | ENSG000001 | LR8        | 19         | VDLJ clear             |              | 5           | 1.068       | 0.237165726 | 5.36        | 501.9       | 436.7   | 5.81    | 9.32   | High | 1    |      |   |
| FALSE | High | Master Prq | Q13838-1 | spliceosom      | 0     | 104.378 | 45 | 16 | 44 | 7  | 428  | 49    | 5.67 | 11.049 | 16 | cell organ   | cytoplasm; catalytic   | at         | P00270 | 7919       | ENSG000001 | XDR3       | 6          | CHR_H5                 | mRNA sur     |             | 13          | 1.068       | 0.288878439 | 11.18       | 5577.5  | 4807.7  | 9.15   | 6.19 | High | 1    |   |
| FALSE | High | Master Prq | P49792   | E3 SUMO-        | 0     | 209.055 | 24 | 53 | 76 | 37 | 3224 | 358   | 6.2  | 144.85 | 53 | cell organ   | cytoplasm; catalytic   | at         | P00160 | 5903       | ENSG000001 | RANBP2     | 2          | RNA trans              |              | 77          | 1.068       | 0.292620668 | 10.24       | 9044.2      | 8470.2  | 6.42    | 4.47   | High | 1    |      |   |
| FALSE | High | Master Prq | P20700   | Lamin-B1        | 0     | 108.579 | 48 | 29 | 47 | 24 | 586  | 66.4  | 5.16 | 80.5   | 29 | cell organ   | membrane catalytic     | at         | P00038 | 74001      | ENSG000001 | LMNB1      | 5          | Apoptosis              | Fas Ligand   | Gene and i  | 34          | 1.068       | 0.300564777 | 11.33       | 6242.2  | 6050.8  | 11.92  | 4.26 | High | 1    |   |
| FALSE | High | Master Prq | Q00341   | Lysine-spe      | 0     | 43.887  | 19 | 10 | 11 | 10 | 852  | 92.8  | 6.52 | 29.6   | 10 | cell organ   | nucleus                | catalytic  | at     | P01366     | 23028      | ENSG000001 | KDM1A      | 1                      | Androgen     | Activated f |             | 16          | 1.068       | 0.320390009 | 9.01    | 1764.1  | 1613.4 | 4.48 | 7.57 | High | 1 |
| FALSE | High | Master Prq | Q07065   | Cytoskelet      | 0     | 125.067 | 43 | 24 | 44 | 23 | 602  | 66    | 5.92 | 111.57 | 24 | metabolic    | cytoplasm; RNA bindi   | P01366     | 10970  | ENSG000001 | CKAP4      | 12         |            |                        |              |             |             |             |             |             |         |         |        |      |      |      |      |      |      |      |      |      |      |   |

|       |      |                      |             |       |         |    |    |     |    |      |       |       |        |    |               |                           |                   |                     |    |                       |             |             |       |             |             |        |         |         |       |       |      |      |      |      |      |      |      |   |
|-------|------|----------------------|-------------|-------|---------|----|----|-----|----|------|-------|-------|--------|----|---------------|---------------------------|-------------------|---------------------|----|-----------------------|-------------|-------------|-------|-------------|-------------|--------|---------|---------|-------|-------|------|------|------|------|------|------|------|---|
| FALSE | High | Master PrC P11233    | Ras-relate  | 0     | 25.791  | 33 | 7  | 13  | 4  | 206  | 23.6  | 7.11  | 20.3   | 7  | cell division | cell surface catalytic ac | P00025, F 5898    | ENSG000001 RALA     | 7  | Rap1 signal RALA down | Translocat  | 22          | 1.064 | 0.762175809 | 2.17        | 2421.9 | 2308.7  | 7.1     | 2.19  | High  | High | High | High | High | High | High | 1    |   |
| FALSE | High | Master PrC P08559    | Pyruvate d  | 0     | 54.935  | 41 | 18 | 31  | 18 | 390  | 43.3  | 8.06  | 44.74  | 18 | metabolic     | mitochondr catalytic ac   | P000676, 5160     | ENSG000001 PDHA1    | X  | Carbon me             | TCA Cycle   | Regulation  | 22    | 1.064       | 0.80963084  | 0.41   | 10093.2 | 9717.8  | 10.56 | 5.09  | High | 1 |
| FALSE | High | Master PrC Q09287    | Succinate-  | 0     | 54.036  | 30 | 12 | 21  | 12 | 463  | 50.3  | 7.42  | 45.33  | 12 | metabolic     | mitochondr catalytic ac   | P000549, F 8803   | ENSG000001 SUCLA2   | 13 | Metabolic             |             | Ub-signal   | 22    | 1.064       | 0.063751276 | 1.77   | 9701.5  | 9239.5  | 6.55  | 4.6   | High | 1 |
| FALSE | High | Master PrC Q04826    | Mitochond   | 0     | 111.873 | 43 | 21 | 38  | 21 | 608  | 67.4  | 7.12  | 94     | 21 | cell comm     | membrane protein br       | P000515, F 9868   | ENSG000001 TOMM70M  | 34 |                       |             |             | 7     | 1.063       | 0.135096392 | 0.71   | 16490.4 | 15509.9 | 9.26  | 4.05  | High | 1 |
| FALSE | High | Master PrC Q70199-1  | Protein un  | 0     | 20.818  | 8  | 5  | 5   | 5  | 1090 | 123.2 | 6.65  | 13.01  | 5  | defense re    | cytoplasm; protein br     | P000168, F 201294 | ENSG000001 UNC130   | 17 |                       | Deregulate  | Neutrophil  | 4     | 1.063       | 0.23455524  | 4.56   | 462.3   | 423.1   | 6.41  | 5.82  | High | 1 |
| FALSE | High | Master PrC Q09180-1  | SUMO-acti   | 0     | 57.941  | 55 | 14 | 17  | 14 | 346  | 38.4  | 5.3   | 43.54  | 14 | metabolic     | cytoplasm; catalytic ac   | P000899           | ENSG000001 SAE1     | 19 | Ubiquitin r           | SUMO is ci  |             | 7     | 1.063       | 0.282946594 | 9.2    | 3770.6  | 3561.3  | 7.82  | 2.24  | High | 1 |
| FALSE | High | Master PrC Q07AE8    | Growth an   | 0     | 10.499  | 14 | 2  | 3   | 2  | 222  | 25.4  | 10.02 | 3.97   | 2  | cell organ    | mitochondr protein br     | P101147           | ENSG000001 GAD60A5G | 19 |                       |             |             | 6     | 1.063       | 0.342371191 | 12.04  | 1350.5  | 1276.2  | 5.92  | 3.23  | High | 1 |
| FALSE | High | Master PrC Q062U8    | Protein FA  | 0     | 10.932  | 10 | 3  | 3   | 3  | 254  | 28.9  | 5.45  | 2.84   | 3  | nucleus       | protein br                | P101887           | ENSG000001 FAM193A  | 16 |                       |             |             | 0     | 1.063       | 0.441514124 | 16.85  | 482.4   | 453.8   | 8.58  | 11.31 | High | 1 |
| FALSE | High | Master PrC Q15343    | NEDD8 [O    | 0     | 10.512  | 43 | 4  | 9   | 4  | 81   | 9.1   | 8.43  | 6.78   | 4  | cellular ho   | cytosol;nuo               | P00240, F 4738    | ENSG000001 NEDD8    | 14 |                       | EGF/EGFR    | Cargo reco  | 16    | 1.063       | 0.57395125  | 29.42  | 2710.2  | 2587.7  | 24.69 | 5.53  | High | 1 |
| FALSE | High | Master PrC Q09115    | Transgelin  | 0     | 10.315  | 18 | 3  | 5   | 2  | 199  | 22.5  | 7.33  | 3.64   | 3  | regulation    | nucleus                   | P003007, F 29114  | ENSG000001 TAGLN3   | 13 |                       |             |             | 0     | 1.063       | 0.926473065 | 30.52  | 889.8   | 1029.5  | 29.88 | 16.08 | High | 1 |
| FALSE | High | Master PrC P21281    | V-type pro  | 0     | 62.02   | 34 | 10 | 15  | 10 | 511  | 56.5  | 5.81  | 58.85  | 10 | cellular ho   | cytoplasm; catalytic ac   | P00006, F 526     | ENSG000001 ATP6V1B2 | 8  | Metabolic             | Transferrin |             | 20    | 1.063       | 0.944338542 | 2.57   | 2411    | 2403.1  | 5.78  | 8.72  | High | 1 |
| FALSE | High | Master PrC Q08225-1  | Isform 1    | 0     | 12.673  | 9  | 3  | 4   | 3  | 438  | 49.5  | 6.46  | 7.14   | 3  | cell death;   | cytoplasm; protein br     | P005918           | ENSG000001 APIS     | 11 |                       |             |             | 0     | 1.063       | 0.966902064 | 13.8   | 271.4   | 257.1   | 12.28 | 6.65  | High | 1 |
| FALSE | High | Master PrC P52294    | Importin s  | 0     | 30.544  | 16 | 6  | 10  | 3  | 538  | 60.2  | 5.01  | 30.59  | 6  | metabolic     | cytoplasm; protein br     | P005514, F 3836   | ENSG000001 KPN1A    | 1  | Influenza A           | Integration |             | 25    | 1.062       | 0.038183798 | 1.22   | 651.4   | 592.9   | 7.69  | 7.39  | High | 1 |
| FALSE | High | Master PrC P00533-1  | epidermal   | 0     | 128.756 | 25 | 22 | 36  | 22 | 1210 | 134.2 | 6.68  | 109.77 | 22 | cell organ    | cell surface catalytic ac | P000609, F 1956   | ENSG000001 EGFR     | 7  | Breast can            | Androgen    | EGFR inter  | 115   | 1.062       | 0.172477182 | 1.65   | 8881.2  | 8592.2  | 2.83  | 2.23  | High | 1 |
| FALSE | High | Master PrC Q075438   | NADH deH    | 0     | 9.049   | 19 | 1  | 5   | 1  | 58   | 7     | 8.92  | 14.77  | 1  | cell organ    | membrane catalytic ac     | P008040           | ENSG000001 NDUF81   | 14 | Alzheimer'            | Electron Tr | Complex I   | 13    | 1.062       | 0.188608988 | 3.63   | 1610.2  | 1604.5  | 9.35  | 7.79  | High | 1 |
| FALSE | High | Master PrC Q15479    | Melanoma    | 0.001 | 4.51    | 6  | 3  | 3   | 2  | 319  | 35.3  | 8.76  | 0      | 3  | metabolic     | protein br                | P014454           | ENSG000001 MAGEB2   | X  |                       |             |             | 0     | 1.062       | 0.208156731 | 1.59   | 72.6    | 69.1    | 8.89  | 21.73 | High | 1 |
| FALSE | High | Master PrC Q06623    | Ceramide    | 0     | 12.755  | 12 | 3  | 5   | 3  | 380  | 44.8  | 8.98  | 5.18   | 3  | metabolic     | endoplasm catalytic ac    | P03798            | ENSG000001 CER2S    | 2  | SpHINGolip            | SpHINGolip  | SpHINGolip  | 8     | 1.062       | 0.346855746 | 12.11  | 1628.2  | 1476.4  | 8.32  | 4.89  | High | 1 |
| FALSE | High | Master PrC Q09N24    | H/ACA ribc  | 0     | 34.134  | 41 | 3  | 10  | 3  | 153  | 17.2  | 8.22  | 36.92  | 3  | cell organ    | nucleus                   | P012148           | ENSG000001 NHP2     | 5  | Ribosome              |             | SpHINGolip  | 10    | 1.062       | 0.347481102 | 12.44  | 1326    | 1253.8  | 25.1  | 10.89 | High | 1 |
| FALSE | High | Master PrC Q09UBT    | SUMO-acti   | 0     | 44.947  | 22 | 12 | 15  | 12 | 640  | 71.2  | 5.29  | 31.72  | 12 | metabolic     | cytoplasm; catalytic ac   | P000899, F 10054  | ENSG000001 UBR2     | 19 | Ubiquitin r           | SUMO is ci  |             | 7     | 1.062       | 0.37894619  | 11.69  | 5308.1  | 4968.3  | 13.89 | 8.74  | High | 1 |
| FALSE | High | Master PrC P01116-2  | Isform 2B   | 0     | 27.003  | 52 | 6  | 7   | 3  | 188  | 21.4  | 8.21  | 20.74  | 6  | cell comm     | cytoplasm; catalytic ac   | P000009, F 3845   | ENSG000001 KRA2     | 12 |                       | IL-5 Signa  |             | 21    | 1.062       | 0.422925264 | 15.99  | 1453.9  | 1368.5  | 18.11 | 5.46  | High | 1 |
| FALSE | High | Master PrC Q15067    | Phosphori   | 0     | 54.591  | 12 | 11 | 15  | 11 | 1338 | 144.6 | 5.76  | 39.84  | 11 | metabolic     | cytoplasm; catalytic ac   | P00586, F 5198    | ENSG000001 PFAS     | 17 | Purine met            | Purine ribc |             | 6     | 1.062       | 0.487995506 | 18.04  | 3812.4  | 3550    | 10.4  | 8.48  | High | 1 |
| FALSE | High | Master PrC Q06P11-1  | Probable 2  | 0     | 20.185  | 13 | 4  | 5   | 4  | 429  | 46.7  | 8.62  | 14.08  | 4  | metabolic     | nucleus                   | P011189           | ENSG000001 NSUN5    | 5  |                       |             |             | 0     | 1.062       | 0.50097537  | 25.4   | 1327.5  | 1269.2  | 29.85 | 5.27  | High | 1 |
| FALSE | High | Master PrC Q09447-1  | ethanolam   | 0     | 9.395   | 7  | 2  | 2   | 2  | 389  | 43.8  | 6.92  | 0      | 2  | metabolic     | membrane catalytic ac     | P01467            | ENSG000001 PCYT2    | 17 | Metabolic             | Kennedy p   | Synthesis c | 9     | 1.062       | 0.58833224  | 49.43  | 572.8   | 662.2   | 58.23 | 15.14 | High | 1 |
| FALSE | High | Master PrC Q06HY6-1  | DORRG do    | 0     | 25.44   | 18 | 4  | 6   | 4  | 314  | 35.6  | 5.12  | 17.24  | 4  | regulation    | cytoplasm; protein br     | P097956           | ENSG000001 DORRGK1  | 20 |                       |             |             | 0     | 1.061       | 0.081122754 | 0.26   | 1896.6  | 1807.7  | 4.12  | 2.64  | High | 1 |
| FALSE | High | Master PrC P31948    | stress-indu | 0     | 191.131 | 65 | 39 | 106 | 39 | 543  | 62.6  | 6.8   | 175.27 | 39 | response t    | cytoplasm; protein br     | P005515, F 10963  | ENSG000001 STP1     | 11 | Prion disea           | HSPP90 cha  |             | 4     | 1.061       | 0.418334168 | 4.18   | 27919.4 | 26808.6 | 6.81  | 1.6   | High | 1 |
| FALSE | High | Master PrC Q08TCA-1  | NEDD8-act   | 0     | 36.812  | 17 | 5  | 8   | 5  | 463  | 51.8  | 5.45  | 23.34  | 5  | metabolic     | cytoplasm; catalytic ac   | P000899, F 9039   | ENSG000001 UBR2     | 13 | Ubiquitin r           | NIK--nonn   |             | 15    | 1.061       | 0.515380276 | 24.36  | 2682.2  | 2527.8  | 23.44 | 9.34  | High | 1 |
| FALSE | High | Master PrC Q09Y282-1 | Endoplasm   | 0     | 10.808  | 7  | 3  | 3   | 3  | 383  | 43.2  | 6.06  | 2.21   | 3  | transport     | endoplasm                 | P07970, F 51614   | ENSG000001 ERGIC3   | 20 |                       |             |             | 0     | 1.061       | 0.68694813  | 25.3   | 809.5   | 763     | 8.32  | 9.82  | High | 1 |
| FALSE | High | Master PrC Q06AC1    | Fermitin fu | 0     | 19.791  | 5  | 3  | 5   | 3  | 680  | 77.8  | 6.7   | 15.12  | 3  | cell organ    | cell surface protein br   | P001609, F 10979  | ENSG000001 FERMT2   | 14 |                       | Cell-extrac |             | 3     | 1.061       | 0.940948028 | 13.95  | 1050.8  | 1003.2  | 12.29 | 6.12  | High | 1 |
| FALSE | High | Master PrC Q095Y4    | Coiled-coil | 0     | 12.279  | 28 | 2  | 2   | 2  | 110  | 12.4  | 6.73  | 5.9    | 2  | cell organ    | mitochond                 | P06747            | ENSG000001 CHCHD5   | 2  |                       | Mitochond   |             | 2     | 1.061       | 0.989232044 | 1.52   | 251.2   | 252.7   | 6.32  | 6.57  | High | 1 |
| FALSE | High | Master PrC Q095456   | Proteasom   | 0     | 8.498   | 11 | 3  | 4   | 3  | 288  | 32.8  | 7.17  | 9.99   | 3  | cell organ    | cytoplasm; protein br     | 8624              | ENSG000001 PSMG1    | 21 |                       |             |             | 0     | 1.06        | 0.094419621 | 4.63   | 1352.6  | 1286.9  | 2.91  | 0.92  | High | 1 |
| FALSE | High | Master PrC P61421    | V-type pro  | 0     | 23.658  | 17 | 5  | 6   | 5  | 351  | 40.3  | 5     | 18.12  | 5  | cell organ    | endosome; catalytic ac    | P01992            | ENSG000001 ATP6V0D1 | 16 | Collecting c          | Transferrin |             | 26    | 1.06        | 0.213166531 | 4.36   | 2838    | 2646.6  | 7.73  | 2.91  | High | 1 |
| FALSE | High | Master PrC Q09K8-1   | Methionin   | 0     | 19.16   | 7  | 4  | 5   | 4  | 725  | 80.4  | 6.49  | 12.75  | 4  | metabolic     | cytoplasm; catalytic ac   | P000175, F 4552   | ENSG000001 MTRR     | 18 |                       | Vitamin B1  | Defective f | 18    | 1.06        | 0.288990057 | 9.43   | 2043.7  | 1927.2  | 4.79  | 4.59  | High | 1 |
| FALSE | High | Master PrC Q09N282-1 | Constitut   | 0     | 37.647  | 9  | 7  | 7   | 7  | 1118 | 121.8 | 8.88  | 23.88  | 7  | cytoplasm;    | RNA bindi                 | 23196             | ENSG000001 FAM120A  | 9  |                       |             |             | 0     | 1.06        | 0.477914066 | 22.28  | 2998.5  | 2879.3  | 29.32 | 4.82  | High | 1 |
| FALSE | High | Master PrC P09493-1  | Isform 5    | 0     | 45.716  | 36 | 12 | 24  | 2  | 245  | 28.4  | 4.77  | 36.88  | 12 | cell organ    | cytoskelet; protein br    | P002661, F 7168   | ENSG000001 TPM1     | 15 |                       | Striated M  |             | 1     | 1.06        | 0.553313743 | 8.57   | 309.6   | 291.6   | 7.95  | 4.13  | High | 1 |
| FALSE | High | Master PrC Q09P03-1  | SH3 domai   | 0     | 5.763   | 2  | 1  | 1   | 1  | 963  | 107.4 | 7.71  | 4.53   | 1  | regulation    | cytoplasm; enzyme re      | P00018, F 23677   | ENSG000001 SH3BP4   | 2  |                       |             |             | 0     | 1.06        | 0.556910494 | 37.39  | 192.5   | 181.5   | 39.35 | 7.74  | High | 1 |
| FALSE | High | Master PrC Q06GQ7    | Probable A  | 0     | 63.054  | 25 | 18 | 26  | 18 | 796  | 89.8  | 9.28  | 51.57  | 18 | metabolic     | chromoso/ catalytic ac    | P00270, F 55661   | ENSG000001 DDX27    | 20 |                       |             |             | 0     | 1.06        | 0.652632562 | 22.43  | 8931.1  | 8869.3  | 13.22 | 6.4   | High | 1 |
| FALSE | High | Master PrC P55337    | Tumor pro   | 0     | 41.154  | 31 | 6  | 9   | 6  | 224  | 24.3  | 4.83  | 23.14  | 6  | cell differ   | cytoplasm; metal ion      | P04001            | ENSG000001 TPDS2    | 8  |                       |             |             | 5     | 1.06        | 0.802593939 | 14.31  | 2889.3  | 2615.9  | 15.34 | 6.83  | High | 1 |
| FALSE | High | Master PrC P30566    | adenosely   | 0     | 14.16   | 11 | 3  | 3   | 3  | 484  | 54.9  | 7.11  | 10.8   | 3  | cell organ    | cytosol;met catalytic ac  | P000606, F 158    | ENSG000001 ADSL     | 22 | Metabolic             | Nucleotide  | Purine ribc | 8     | 1.059       | 0.142074713 | 6.56   | 393     | 388.2   | 6.35  | 9.54  | High | High | High | High |      |      |      |   |



|       |      |                     |              |       |         |    |    |     |    |      |       |       |        |    |              |                         |                  |                 |            |            |              |              |             |             |             |             |             |             |         |         |        |       |       |      |      |      |      |      |      |      |      |      |      |      |   |
|-------|------|---------------------|--------------|-------|---------|----|----|-----|----|------|-------|-------|--------|----|--------------|-------------------------|------------------|-----------------|------------|------------|--------------|--------------|-------------|-------------|-------------|-------------|-------------|-------------|---------|---------|--------|-------|-------|------|------|------|------|------|------|------|------|------|------|------|---|
| FALSE | High | Master Prc Q135642  | Cdc42-inte   | 0     | 27.958  | 15 | 6  | 6   | 6  | 601  | 68.3  | 5.73  | 11.01  | 6  | cell comm    | cytoplasm; enzyme re    | P00018, F 9322   | ENSG000001      | TRIP10     | 19         | Insulin sign | Angiogenesis | Rho GTPase  | 8           | 1.055       | 0.75020682  | 23.28       | 189.2       | 181.3   | 18.92   | 17     | High  | High  | High | High | High | High | High | High | 1    |      |      |      |      |   |
| FALSE | High | Master Prc P427171  | cyclin-depe  | 0     | 31.35   | 45 | 4  | 10  | 4  | 156  | 16.5  | 5.81  | 23.43  | 4  | cell organ   | cytoplasm; catalytic ac | P12796, F 1029   | ENSG000001      | CDKN2A     | 9          | HTLV-1 infe  | TP53 Netw    | Cyclin D as | 32          | 1.055       | 0.750726699 | 6.22        | 1859        | 1872.6  | 7.27    | 5.31   | High  | High  | High | High | High | High | High | High | 1    |      |      |      |      |   |
| FALSE | High | Master Prc Q8Y88    | ATP-deper    | 0     | 21.691  | 5  | 3  | 6   | 3  | 786  | 87.9  | 7.99  | 15     | 3  | cell organ   | mitochondr              | catalytic ac     | P000271, F 6832 | ENSG000001 | SUPV3L1    | 10           |              |             |             | 0           | 1.055       | 0.876910009 | 17.01       | 708.4   | 671.6   | 10.61  | 12.55 | High  | High | High | High | High | High | High | High | 1    |      |      |      |   |
| FALSE | High | Master Prc Q00059   | Transcripti  | 0     | 18.451  | 28 | 7  | 10  | 7  | 246  | 29.1  | 9.72  | 12.08  | 7  | cell organ   | cytosol;mi              | DNA bindi        | P000505, F 7019 | ENSG000001 | TAM        | 10           | Huntington   | Energy Met  | Mitochondr  | 10          | 1.054       | 0.01193592  | 0.15        | 1157.9  | 1113.4  | 5.86   | 5.61  | High  | High | High | High | High | High | High | High | 1    |      |      |      |   |
| FALSE | High | Master Prc Q99459   | Cell divisio | 0     | 94.612  | 27 | 14 | 26  | 14 | 802  | 92.2  | 8.18  | 95.39  | 14 | cell organ   | cytoplasm; DNA bindi    | P000409, F 9088  | ENSG000001      | CDCL5      | 6          | Spliceosom   |              | mRNA Splic  | 5           | 1.054       | 0.203826788 | 2.03        | 6970.5      | 6613.8  | 4.65    | 4.48   | High  | High  | High | High | High | High | High | High | 1    |      |      |      |      |   |
| FALSE | High | Master Prc Q43930   | NADH dehyd   | 0     | 17.972  | 47 | 4  | 4   | 4  | 106  | 12.5  | 9.14  | 13.91  | 4  | cell organ   | membrane                | catalytic ac     | P112000         | 4725       | ENSG000001 | NDUF55       | 1            | Oxidative x | Electron Tr | Complex I   | 13          | 1.054       | 0.3325506   | 7.8     | 1539    | 1432.4 | 13.68 | 1.15  | High | 1    |      |      |   |
| FALSE | High | Master Prc Q8N163-1 | Cell cycle r | 0     | 94.102  | 27 | 18 | 26  | 18 | 923  | 102.8 | 5.22  | 70.01  | 18 | cell organ   | cytoplasm; enzyme re    | P14443, F 57805  | ENSG000001      | CA2, KIF   | 8          |              |              | Regulation  | 4           | 1.054       | 0.376893738 | 11.1        | 4289.3      | 4068.2  | 8.28    | 7.28   | High  | High  | High | High | High | High | High | High | 1    |      |      |      |      |   |
| FALSE | High | Master Prc Q95573   | long-chain   | 0     | 124.538 | 34 | 17 | 33  | 15 | 720  | 80.4  | 8.38  | 97.44  | 17 | cell organ   | endoplasm               | catalytic ac     | P000501         | 2181       | ENSG000001 | ACSL3        | 2            | Metabolic   | Fatty Acid  | Synthesis c | 16          | 1.054       | 0.467135307 | 17.38   | 8851.9  | 8581.4 | 19.67 | 4.43  | High | 1    |      |      |   |
| FALSE | High | Master Prc Q95340   | bifunction   | 0     | 58.445  | 22 | 11 | 15  | 10 | 614  | 69.5  | 8.03  | 43.2   | 11 | coagulation  | cytosol                 | catalytic ac     | P01583, F 9060  | ENSG000001 | PAPSS2     | 10           | Selenocom    | RANL/RNA    | Transfer    | 20          | 1.054       | 0.497406801 | 22.72       | 3139.9  | 2978.7  | 27.38  | 0.82  | High  | High | High | High | High | High | High | High | 1    |      |      |      |   |
| FALSE | High | Master Prc Q9K532   | 182 kDa ta   | 0     | 106.809 | 18 | 23 | 31  | 23 | 1729 | 181.7 | 4.86  | 67.24  | 23 | cell organ   | chromosom               | protein br       | P115327         | 85456      | ENSG000001 | SNB1BP1      | 11           | TP53 regul  |             |             | 9           | 1.054       | 0.571774923 | 30.6    | 4171.8  | 3968.1 | 29.11 | 8.45  | High | 1    |      |      |   |
| FALSE | High | Master Prc Q15397-1 | Importin-8   | 0     | 9.334   | 4  | 3  | 4   | 2  | 1037 | 119.9 | 5.16  | 9.3    | 3  | regulation   | cytoplasm; protein br   | P03810, F 10526  | ENSG000001      | IP08       | 12         |              |              | Transcripti | 3           | 1.054       | 0.668364867 | 49.35       | 249.7       | 236.9   | 40.31   | 12.8   | High  | High  | High | High | High | High | High | High | 1    |      |      |      |      |   |
| FALSE | High | Master Prc Q15540   | Fatty acid   | 0.006 | 2.5     | 5  | 1  | 2   | 1  | 132  | 14.9  | 5.59  | 4.49   | 1  | cell differe | cytoplasm; transport    | P00061, F 2173   | ENSG000001      | FABP7      | 6          | PPAR sign    | PPAR sign    | Triglycerid | 6           | 1.054       | 0.864421675 | 4.93        | 492         | 472.7   | 9.27    | 6.07   | High  | High  | High | High | High | High | High | High | High | 1    |      |      |      |   |
| FALSE | High | Master Prc Q9ULT8   | E3 ubiquiti  | 0     | 21.884  | 3  | 6  | 7   | 6  | 2610 | 289.2 | 5.35  | 12.63  | 6  | metabolic    | cytoplasm               | catalytic ac     | P00023, F 25831 | HCTD1      | 14         |              |              | Antigen pr  | 4           | 1.054       | 0.888943777 | 27.77       | 876.8       | 896.5   | 22.3    | 5.68   | High  | High  | High | High | High | High | High | High | High | 1    |      |      |      |   |
| FALSE | High | Master Prc Q5T653   | 39S riboso   | 0     | 7.1     | 5  | 1  | 1   | 1  | 305  | 33.3  | 11.3  | 1.62   | 1  | cell organ   | membrane                | catalytic ac     | P00181, F 51069 | ENSG000001 | MRP12      | 6            | Ribosome     |             | Mitochondr  | 7           | 1.054       | 0.996113322 | 70.39       | 381.3   | 357.7   | 46.05  | 8.78  | High  | High | High | High | High | High | High | High | High | 1    |      |      |   |
| FALSE | High | Master Prc Q9UBX3   | Mitochondr   | 0     | 28.415  | 21 | 4  | 8   | 4  | 287  | 31.3  | 9.54  | 30.05  | 4  | metabolic    | membrane                | protein br       | P00153          | 1468       | ENSG000001 | SLC25A10     | 17           | Proximal tr |             | Glucose     | 13          | 1.053       | 0.079503007 | 3.31    | 3382.9  | 3106.6 | 5.09  | 4.3   | High | 1    |      |   |
| FALSE | High | Master Prc Q9NWT8   | Aurora kin   | 0.002 | 4.013   | 5  | 1  | 1   | 1  | 199  | 22.3  | 10.76 | 2.14   | 1  | cell organ   | membrane                | catalytic ac     | P08213          | 54998      | ENSG000001 | AURKAIP1     | 1            | Mitochondr  |             | Mitochondr  | 6           | 1.053       | 0.310105918 | 8.48    | 772.7   | 721.4  | 7.76  | 1.52  | High | 1    |      |   |
| FALSE | High | Master Prc Q15276   | Rab GTPase   | 0     | 26.174  | 10 | 6  | 6   | 6  | 862  | 99.2  | 5.01  | 14.04  | 6  | cell death   | cytoplasm; enzyme re    | P01496, F 9135   | ENSG000001      | RABEP1     | 17         | Endocytosi   |              | TBC/RABG    | 5           | 1.053       | 0.315006706 | 2.33        | 324.7       | 289.2   | 18.22   | 4.44   | High  | High  | High | High | High | High | High | High | High | High | 1    |      |      |   |
| FALSE | High | Master Prc Q9H936   | Mitochondr   | 0     | 22.995  | 22 | 5  | 7   | 5  | 323  | 34.4  | 9.29  | 15.55  | 5  | transport    | membrane                | transport        | P00153          | 14988      | ENSG000001 | SLC5A22      | 11           |             |             | Organic ac  | 4           | 1.053       | 0.334790631 | 2.61    | 978     | 920.4  | 0.89  | 4.63  | High | 1    |      |   |
| FALSE | Low  | Master Prc Q4A288-1 | Probable r   | 0.071 | 1.037   | 3  | 1  | 1   | 1  | 527  | 58    | 8.68  | 0      | 1  | metabolic    | cytoplasm; catalytic ac | P115977          | 340152          | ENSG000001 | C23H120    | 6            |              |             |             | 0           | 1.053       | 0.499286694 | 22.41       | 825.3   | 806.4   | 28.22  | 7.12  | High  | High | High | High | High | High | High | High | High | 1    |      |      |   |
| FALSE | High | Master Prc P62979   | Ubiquitin    | 0     | 72.075  | 64 | 9  | 39  | 4  | 156  | 18    | 9.64  | 119.63 | 9  | cell organ   | cytoplasm; metal ion    | P000240, F 6233  | ENSG000001      | RPS27A     | 2          | Ribosome     | Cytoplasm    | NOTCH1 r    | 364         | 1.053       | 0.511798381 | 3.19        | 2160.1      | 2146.6  | 2.78    | 5.88   | High  | High  | High | High | High | High | High | High | High | High | 1    |      |      |   |
| FALSE | High | Master Prc Q43819   | Protein SC   | 0     | 8.59    | 14 | 3  | 4   | 3  | 266  | 29.8  | 8.85  | 5.94   | 3  | cell organ   | membrane                | antioxidan       | P00578, F 9997  | ENSG000001 | SCD2       | 22           | Central car  | Copper hox  | TP53 Regu   | 11          | 1.053       | 0.67893721  | 40.94       | 46.1    | 43.9    | 29.51  | 8.98  | High  | High | High | High | High | High | High | High | High | High | 1    |      |   |
| FALSE | High | Master Prc Q9N985   | CDKN2A-ir    | 0     | 16.343  | 9  | 4  | 5   | 4  | 580  | 61.1  | 9.01  | 12.17  | 4  | regulation   | nucleus                 | protein br       | P115952         | 55602      | ENSG000001 | CDKN2AIP     | 4            |             |             |             | 0           | 1.053       | 0.736685874 | 20.15   | 407.1   | 386.4  | 1.1   | 15.63 | High | 1    |      |   |
| FALSE | High | Master Prc P67870   | Casein kin   | 0     | 20.349  | 30 | 3  | 6   | 3  | 215  | 24.9  | 5.55  | 20.1   | 3  | cell comm    | chromosom               | catalytic ac     | P01214          | 1460       | ENSG000001 | CNK2B        | 6, CHR_H5    | Adherens j  | WNT medi    | 47          | 1.053       | 0.798374131 | 11.92       | 1001.8  | 920.4   | 12.29  | 4.55  | High  | High | High | High | High | High | High | High | High | High | 1    |      |   |
| FALSE | High | Master Prc Q96552   | GPI transac  | 0     | 15.909  | 8  | 3  | 3   | 3  | 555  | 61.6  | 6.49  | 10.85  | 3  | metabolic    | endoplasm               | catalytic ac     | P10510          | 94005      | ENSG000001 | PIGS         | 17           | Metabolic   |             | Attachme    | 6           | 1.052       | 0.119635372 | 5.07    | 1446.5  | 1375.1 | 3.95  | 7.36  | High | 1    |   |
| FALSE | High | Master Prc Q87233   | Brain acid   | 0     | 336.367 | 87 | 21 | 174 | 21 | 227  | 22.7  | 4.63  | 44.29  | 21 | cell differe | cytoplasm; DNA bindi    |                  | 10409           | ENSG000001 | BASP1      | 5            |              |             |             | 0           | 1.052       | 0.326376573 | 5.96        | 45828.9 | 48378.3 | 7.65   | 3.96  | High  | High | High | High | High | High | High | High | High | High | 1    |      |   |
| FALSE | Low  | Master Prc Q8BXQ3   | Uncharacter  | 0.065 | 1.081   | 6  | 1  | 1   | 1  | 194  | 21.1  | 5.01  | 0      | 1  |              |                         |                  | P115017         | 55071      | ENSG000001 | C1orf40      | 9            |             |             |             | 0           | 1.052       | 0.415825862 | 12.5    | 260.8   | 247.9  | 5.2   | 8.45  | High | 1    |   |
| FALSE | High | Master Prc Q75306-1 | NADH dehyd   | 0     | 46.328  | 19 | 7  | 16  | 7  | 463  | 52.5  | 7.55  | 40.83  | 7  | cell organ   | membrane                | catalytic ac     | P00346          | 4720       | ENSG000001 | NDUF52       | 1            | Oxidative x | Electron Tr | Complex I   | 13          | 1.052       | 0.440248744 | 16.57   | 6959.3  | 6850.6 | 39.27 | 8.12  | High | 1    |   |
| FALSE | High | Master Prc Q6ZRV2   | Protein FA   | 0.008 | 2.214   | 2  | 1  | 1   | 1  | 1179 | 127   | 6.98  | 1.8    | 1  | cell organ   | cytoplasm; protein br   | P07894, F 286077 | ENSG000001      | FAM83B     | 8, CHR_H5  | 0            |              |             |             | 0           | 1.052       | 0.605301138 | 36.01       | 981.4   | 1114.5  | 40.34  | 10.33 | High  | High | High | High | High | High | High | High | High | High | 1    |      |   |
| FALSE | High | Master Prc P27540   | Aryl hydro   | 0     | 5.447   | 2  | 1  | 1   | 1  | 789  | 86.6  | 6.54  | 3.96   | 1  | cell differe | cytoplasm; DNA bindi    | P00010, F 405    | ENSG000001      | ARNT       | 1          | Chemical c   | Angiogene    | Aryl hydro  | 23          | 1.052       | 0.607709979 | 29.53       | 559.7       | 554     | 25.39   | 5.79   | High  | High  | High | High | High | High | High | High | High | High | High | 1    |      |   |
| FALSE | High | Master Prc Q9H973   | elongator    | 0.003 | 2.893   | 3  | 2  | 2   | 2  | 547  | 62.2  | 8.88  | 4.52   | 2  | cell organ   | cytoplasm; catalytic ac | P04055           | 55140           | ENSG000001 | ELP3       | 8            | HATs acety   |             |             | 3           | 1.052       | 0.707813543 | 16.05       | 663.3   | 630.9   | 8.36   | 5.74  | High  | High | High | High | High | High | High | High | High | High | 1    |      |   |
| FALSE | High | Master Prc Q13557   | Calcium/ci   | 0     | 12.458  | 9  | 2  | 2   | 1  | 499  | 56.3  | 7.25  | 8.11   | 2  | metabolic    | cytoplasm; catalytic ac | P00069, F 817    | ENSG000001      | CAMK2D     | 4          | HIF-1 sign   | Physiolog    | Iron homeo  | 64          | 1.052       | 0.794020146 | 28.94       | 342         | 325     | 22.04   | 16.22  | High  | High  | High | High | High | High | High | High | High | High | High | 1    |      |   |
| FALSE | High | Master Prc Q9Y224   | Tyrosine-t   | 0     | 24.04   | 18 | 6  | 6   | 6  | 477  | 53.2  | 7.88  | 9.11   | 6  | metabolic    | cytoplasm; catalytic ac | P00579           | 51067           | ENSG000001 | RYAS2      | 12           | Aminoacyl    |             | Mitochondr  | 5           | 1.051       | 0.196623195 | 1.33        | 1931.1  | 1837.5  | 5.05   | 1.9   | High  | High | High | High | High | High | High | High | High | High | 1    |      |   |
| FALSE | High | Master Prc P30405   | Pestidipyr   | 0     | 72.4    | 70 | 12 | 27  | 10 | 207  | 22    | 9.38  | 48.63  | 12 | cell death   | membrane                | catalytic ac     | P00160          | 10105      | ENSG000001 | PIPF         | 10           | Parkinson'  |             |             | 5           | 1.051       | 0.209677563 | 6.54    | 6879.2  | 6345.7 | 4.72  | 2.6   | High | 1    |   |
| FALSE | High | Master Prc Q72384   | Nucleopor    | 0     | 19.865  | 11 | 5  | 5   | 5  | 507  | 55.4  | 7.02  | 14.69  | 5  | cell organ   | membrane                | protein br       | P113874         | 53371      | ENSG000001 | NUP54        | 4            | RNA trans   |             | Rev-media   | 64          | 1.051       | 0.232399627 | 2.18    | 2016    | 1914.3 | 2.02  | 4.24  | High | 1 |
| FALSE | High | Master Prc Q9S801   | Tetratricol  | 0     | 5.21    | 5  | 2  | 2   | 2  | 387  | 44.7  | 5.6   | 5.2    | 2  |              |                         |                  | P13144, F 7268  | ENSG000001 | TTCA       | 1            |              |             |             | 0           | 1.051       | 0.416074551 | 12.94       | 712.9   | 632.7   | 11.61  | 4.49  | High  | High | High | High | High | High | High | High | High | High | 1    |      |   |
| FALSE | High | Master Prc Q9N988   | probable R   | 0     | 10.118  | 18 | 2  | 3   |    |      |       |       |        |    |              |                         |                  |                 |            |            |              |              |             |             |             |             |             |             |         |         |        |       |       |      |      |      |      |      |      |      |      |      |      |      |   |

|       |        |                     |             |       |         |    |    |     |    |      |       |       |        |    |                                        |                  |                    |                  |              |                                   |             |    |       |             |             |         |         |        |       |      |      |      |      |      |      |      |   |
|-------|--------|---------------------|-------------|-------|---------|----|----|-----|----|------|-------|-------|--------|----|----------------------------------------|------------------|--------------------|------------------|--------------|-----------------------------------|-------------|----|-------|-------------|-------------|---------|---------|--------|-------|------|------|------|------|------|------|------|---|
| FALSE | High   | Master Prq P41091   | eukaryotic  | 0     | 57.561  | 31 | 11 | 18  | 11 | 472  | 51.1  | 8.4   | 41.86  | 11 | metabolic; cytoplasm; catalytic ai     | P00009, F 1968   | ENSG000001EF253    | X                | RNA trans    | Translation                       | Formation   | 15 | 1.047 | 0.190055178 | 4.86        | 4034.3  | 3854.2  | 2.85   | 1.1   | High | 1 |
| FALSE | High   | Master Prq Q13499-1 | cytoplasm   | 0     | 6.634   | 3  | 1  | 2   | 1  | 638  | 71.4  | 5.2   | 7.72   | 1  | cell division; cytoplasm; catalytic ai | P00400, F 1781   | ENSG000001DNC12    | 13               | Phagosome    | COPII index                       |             | 48 | 1.047 | 0.449602097 | 15.19       | 870.2   | 766     | 13.29  | 11.25 | High | High | High | High | High | High | 1    |   |
| FALSE | High   | Master Prq Q17554   | WW doma     | 0     | 7.275   | 3  | 1  | 1   | 1  | 376  | 42.5  | 5.57  | 3.97   | 1  | metabolic; nucleus; metal ion          | P00397, F 11193  | ENSG000001WB94     | 13               |              | mRNA Spli                         |             | 4  | 1.047 | 0.547689794 | 22.76       | 192.2   | 190     | 22.44  | 9.09  | High | High | High | High | High | High | 1    |   |
| FALSE | High   | Master Prq Q17507   | Dialcylgly  | 0.003 | 3.209   | 4  | 1  | 1   | 1  | 488  | 55.2  | 9.32  | 3.32   | 1  | cell organi; endoplasm; catalytic ai   | P03062, 8694     | ENSG000001DGA1     | 14               | Retinol me   | Triacylgly                        | Triglycerid | 17 | 1.047 | 0.673739591 | 12.16       | 552.5   | 538.4   | 13.88  | 4.02  | High | High | High | High | High | High | 1    |   |
| FALSE | High   | Master Prq Q17507   | Dehydroge   | 0     | 13.994  | 12 | 2  | 2   | 2  | 313  | 33.9  | 7.83  | 9.06   | 2  | metabolic; cytoplasm; catalytic ai     | P00106, F 115817 | ENSG000001DHS1     | 14               |              |                                   |             | 0  | 1.047 | 0.886088698 | 11.23       | 156.5   | 149.4   | 5.77   | 11.52 | High | High | High | High | High | High | 1    |   |
| FALSE | High   | Master Prq Q17532   | Chromatin   | 0     | 34.542  | 23 | 5  | 11  | 5  | 248  | 26.4  | 12.23 | 32.41  | 5  | metabolic; nucleus; DNA bindi          | P13865, 26097    | ENSG000001CHPC     | 1                |              | Cleavage o                        |             | 9  | 1.046 | 0.347563015 | 8.69        | 3927.3  | 3755.5  | 7.12   | 2.14  | High | High | High | High | High | High | 1    |   |
| FALSE | High   | Master Prq Q17532   | Protein Pri | 0     | 74.042  | 8  | 18 | 23  | 16 | 2896 | 316.7 | 9.13  | 53.97  | 18 | cell organi; endoplasm; protein bir    | P07001, 23215    | ENSG000001PRKC     | 1                |              |                                   |             | 0  | 1.046 | 0.446173178 | 13.39       | 3975.8  | 3896.8  | 15.38  | 2.45  | High | High | High | High | High | High | 1    |   |
| FALSE | High   | Master Prq Q17547-1 | PC4 and S   | 0     | 31.257  | 15 | 7  | 12  | 6  | 530  | 60.1  | 9.13  | 27.43  | 7  | cell organi; cytosol;nu                | P08555, F 11168  | ENSG000001PSP1     | 19               |              | 2-LTR circ                        |             | 13 | 1.046 | 0.462550154 | 13.8        | 1521.3  | 1546.2  | 15.33  | 4.03  | High | High | High | High | High | High | 1    |   |
| FALSE | Medium | Master Prq P84101-1 | Small EDR   | 0.029 | 1.436   | 14 | 1  | 1   | 1  | 59   | 6.9   | 10.45 | 2.04   | 1  | cytosol;nu                             | 10169            | ENSG000001SERF     | 2                |              |                                   |             | 0  | 1.046 | 0.516535073 | 34.97       | 457.8   | 437.7   | 52.13  | 8.66  | High | High | High | High | High | High | 1    |   |
| FALSE | High   | Master Prq P07910-2 | Isomorf C1  | 0     | 242.733 | 56 | 23 | 142 | 23 | 293  | 32.3  | 5.08  | 357.07 | 23 | cell differe; cytoskelet; DNA bindi    | P00076, F 3183   | ENSG000001HNRNPF   | 14               |              | mRNA Pro                          |             | 1  | 1.046 | 0.548994035 | 8.72        | 50974   | 48754.9 | 4.4    | 3.73  | High | High | High | High | High | High | 1    |   |
| FALSE | High   | Master Prq Q17507   | ATP-deper   | 0     | 24.012  | 10 | 6  | 8   | 6  | 859  | 96.3  | 9.06  | 18.79  | 6  | metabolic; cytoplasm; catalytic ai     | P00270, F 57062  | ENSG000001DDX24    | 14               | CHR_H        |                                   |             | 0  | 1.046 | 0.568324222 | 28.39       | 1706.7  | 1766.5  | 32.28  | 11.83 | High | High | High | High | High | High | 1    |   |
| FALSE | High   | Master Prq Q14776-1 | Transcript  | 0     | 21.125  | 8  | 7  | 8   | 7  | 1098 | 123.8 | 8.65  | 11.03  | 7  | metabolic; nucleus; protein bir        | P00397, F 10915  | ENSG000001TCERG1   | 5                | Spliceosom   |                                   |             | 1  | 1.046 | 0.880567799 | 15.25       | 1809.7  | 1729.3  | 5.15   | 9.32  | High | High | High | High | High | High | 1    |   |
| FALSE | High   | Master Prq P61527   | 60S riboso  | 0     | 13.411  | 39 | 6  | 13  | 6  | 97   | 11.1  | 11.74 | 14.62  | 6  | cell organi; cytosol;rib               | P101907, 6167    | ENSG000001RPL37    | 5                | Ribosome     | Cytoplasm; Peptide ch             |             | 34 | 1.045 | 0.286668719 | 5.17        | 6240.5  | 5971    | 3.34   | 6.99  | High | High | High | High | High | High | 1    |   |
| FALSE | Medium | Master Prq Q13637   | Ras-relate  | 0.024 | 1.511   | 6  | 1  | 1   | 1  | 225  | 25    | 6.54  | 0      | 1  | cell organi; cytosol;en                | P00025, F 10981  | ENSG000001RAB32    | 6                |              | RAB GEF s                         |             | 7  | 1.045 | 0.357556825 | 3.36        | 295.7   | 282.8   | 22.22  | 5.03  | High | High | High | High | High | High | 1    |   |
| FALSE | High   | Master Prq Q13561-1 | dynactin si | 0     | 47.66   | 26 | 8  | 11  | 8  | 401  | 44.2  | 5.21  | 23.67  | 8  | cell organi; chromosom; catalytic ai   | P04912, 10540    | ENSG000001DCTN2    | 12               | Huntingtong  | COPII-depe                        |             | 35 | 1.045 | 0.408308775 | 11.2        | 2642.7  | 2521.1  | 18.17  | 2.08  | High | High | High | High | High | High | 1    |   |
| FALSE | High   | Master Prq Q13561-1 | Transmem    | 0     | 32.415  | 17 | 4  | 12  | 4  | 235  | 27.3  | 8.02  | 28.81  | 4  | cell organi; endoplasm; protein bir    | P01105, 54732    | ENSG000001TMED9    | 5                |              | COPII-depe                        |             | 11 | 1.045 | 0.472169029 | 9.16        | 1912.7  | 1853.3  | 5.03   | 3.18  | High | High | High | High | High | High | 1    |   |
| FALSE | High   | Master Prq Q13561-1 | U6 snRNA    | 0     | 8.728   | 33 | 2  | 5   | 2  | 103  | 11.6  | 5.27  | 4.82   | 2  | metabolic; cytosol;nu                  | P01423, 51690    | ENSG000001LSM7     | 19               | Spliceosom   | mRNA Pro                          | mRNA Spli   | 9  | 1.045 | 0.489036395 | 14.97       | 1279    | 1178.3  | 10.21  | 5.7   | High | High | High | High | High | High | 1    |   |
| FALSE | High   | Master Prq Q13561-1 | Midasin [C] | 0     | 8.878   | 1  | 3  | 3   | 3  | 5596 | 63.2  | 5.68  | 5.88   | 3  | cell organi; cytosol; catalytic ai     | P00004, F 23195  | ENSG000001MDN1     | 1                | Ribosome     |                                   |             | 1  | 1.045 | 0.517325468 | 17.5        | 248.5   | 237.8   | 11.82  | 8.1   | High | High | High | High | High | High | 1    |   |
| FALSE | High   | Master Prq Q14247-1 | Scr substr  | 0     | 124.288 | 49 | 28 | 56  | 28 | 550  | 61.5  | 5.4   | 110.02 | 28 | cell organi; cytoplasm; protein bir    | P00018, F 2017   | ENSG000001CTTN     | 11               | Proteoglyc   | Pathogen; RHO GTPa                |             | 14 | 1.045 | 0.643301951 | 14.27       | 8365.3  | 8007.4  | 5.68   | 5.5   | High | High | High | High | High | High | 1    |   |
| FALSE | High   | Master Prq Q13527   | Keratin, ty | 0     | 432.298 | 76 | 44 | 273 | 37 | 483  | 53.7  | 5.59  | 593.32 | 44 | cell death; cytoplasm; catalytic ai    | P00038, F 3856   | ENSG000001KRT8     | 12               |              | Primary G                         | Formation   | 4  | 1.045 | 0.729177945 | 23.18       | 80708.4 | 77255.5 | 8.41   | 7.55  | High | High | High | High | High | High | 1    |   |
| FALSE | High   | Master Prq Q13527   | ribulose-ph | 0     | 11.922  | 12 | 2  | 2   | 2  | 228  | 24.9  | 5.58  | 9.64   | 2  | metabolic; cytosol; catalytic ai       | P00218, F 6120   | ENSG000001PEP      | 9                | Biosynthes   | Pentose Ph                        | Pentose ph  | 9  | 1.045 | 0.739399193 | 22.78       | 224.4   | 214.8   | 11.2   | 5.49  | High | High | High | High | High | High | 1    |   |
| FALSE | High   | Master Prq P35237   | serpin B6   | 0     | 66.584  | 42 | 13 | 25  | 13 | 376  | 42.6  | 5.27  | 64.55  | 13 | regulation; cytoplasm; enzyme re       | P00079, 5269     | ENSG000001SERPINEB | 6                | Amoebiasis   | Extracellu                        | Enzyme re   | 7  | 1.045 | 0.823267022 | 25.52       | 5296.6  | 5506.9  | 18.79  | 5.87  | High | High | High | High | High | High | 1    |   |
| FALSE | High   | Master Prq P63313   | thymosin a  | 0     | 20.066  | 48 | 5  | 19  | 2  | 44   | 5     | 5.36  | 41.9   | 5  | cell organi; cytoplasm; protein bir    | 9168             | ENSG000001TMSB10   | 2                |              |                                   |             | 0  | 1.045 | 0.869406689 | 13.61       | 1983    | 1975.6  | 7.76   | 14.6  | High | High | High | High | High | High | 1    |   |
| FALSE | High   | Master Prq Q13523   | deoxynuck   | 0     | 10.246  | 6  | 3  | 3   | 3  | 626  | 72.2  | 7.14  | 9.3    | 3  | cell organi; membrane; catalytic ai    | P00536, F 25939  | ENSG000001SAMHD1   | 20               |              | Nucleobas                         |             | 7  | 1.045 | 0.903851669 | 20.91       | 1091    | 1026.8  | 4.77   | 14.65 | High | High | High | High | High | High | 1    |   |
| FALSE | High   | Master Prq P12429   | annexin A   | 0     | 90.598  | 40 | 15 | 36  | 15 | 323  | 36.4  | 5.92  | 67.78  | 15 | defense re; cytoplasm; enzyme re       | P00191, 306      | ENSG000001ANXA3    | 4                | Prostaglan   |                                   |             | 1  | 1.045 | 0.949248519 | 2.64        | 17796.2 | 17828.3 | 7.87   | 3.59  | High | High | High | High | High | High | 1    |   |
| FALSE | High   | Master Prq Q15424-1 | Scaffold at | 0     | 59.077  | 16 | 14 | 25  | 9  | 915  | 102.6 | 5.47  | 44.89  | 14 | cell organi; nucleus                   | DNA bindi        | P00006, F 6294     | ENSG000001SFAH   | 19           |                                   | Structural  |    | 1     | 1.044       | 0.726324223 | 6.4     | 3701.8  | 3519.3 | 2.72  | 4.36 | High | High | High | High | High | High | 1 |
| FALSE | High   | Master Prq Q13523   | WD repeat   | 0     | 33.362  | 35 | 6  | 8   | 6  | 305  | 33.6  | 5.47  | 24.19  | 6  | cell organi; cytoplasm; protein bir    | P00400, F 80349  | ENSG000001WDR61    | 15               | RNA degra    | mRNA dec                          |             | 13 | 1.044 | 0.327491297 | 3.86        | 1410.3  | 1342.7  | 13.29  | 3.91  | High | High | High | High | High | High | 1    |   |
| FALSE | High   | Master Prq P51648   | Fatty acide | 0     | 30.659  | 21 | 8  | 13  | 8  | 485  | 54.8  | 7.88  | 25.37  | 8  | metabolic; endoplasm; catalytic ai     | P00171, 224      | ENSG000001ALDH3A2  | 17               | Glycerolip   | Tryptophan                        | Sphingolip  | 18 | 1.044 | 0.351711247 | 4.65        | 1419    | 1358.7  | 4.42   | 0.32  | High | High | High | High | High | High | 1    |   |
| FALSE | High   | Master Prq Q02388-1 | Collagen a  | 0     | 8.153   | 2  | 4  | 4   | 4  | 2944 | 295   | 6.27  | 0      | 4  | cell differe; extracellul              | enzyme re        | P00014, F 1294     | ENSG000001COL1A1 | 3            | Protein dig                       | Collagen d  |    | 20    | 1.044       | 0.414474846 | 10.74   | 70      | 66.9   | 16.62 | 9.47 | High | High | High | High | High | High | 1 |
| FALSE | High   | Master Prq Q14566   | DNA replic  | 0     | 70.992  | 22 | 16 | 24  | 16 | 821  | 92.8  | 5.41  | 51.08  | 16 | metabolic; nucleus                     | catalytic ai     | P00043, F 4175     | ENSG000001MCM6   | 2            | Cell cycle; Cell Cycle; M/G1 Tran |             | 26 | 1.044 | 0.459188983 | 13.44       | 9186.6  | 8803.2  | 9.7    | 6.2   | High | High | High | High | High | High | 1    |   |
| FALSE | High   | Master Prq Q13523   | Masparidin  | 0.004 | 2.768   | 3  | 1  | 1   | 1  | 308  | 34.9  | 6.28  | 1.93   | 1  | metabolic; cytoplasm; catalytic ai     | P00561, F 51324  | ENSG000001SPG21    | 2                | Endocytosi   |                                   |             | 1  | 1.044 | 0.48821899  | 15.43       | 571.3   | 559.2   | 15.87  | 4.79  | High | High | High | High | High | High | 1    |   |
| FALSE | High   | Master Prq Q15431-1 | Autophagy   | 0     | 7.758   | 6  | 2  | 3   | 2  | 517  | 56.5  | 5.12  | 6.55   | 2  | cell organi; cytoplasm; protein bir    | P101033, 9776    | ENSG000001ATG13    | 11               | Autophagy    | P13K-AKT-r                        | Macroautic  | 6  | 1.044 | 0.52449627  | 39.56       | 539.2   | 516.2   | 57.72  | 18.2  | High | High | High | High | High | High | 1    |   |
| FALSE | High   | Master Prq Q12904-1 | aminoacyl   | 0     | 41.571  | 30 | 7  | 12  | 7  | 312  | 34.3  | 8.43  | 35.39  | 7  | cell comm; cell surface; protein bir   | P01588, 9255     | ENSG000001AIMP1    | 4                | Cytosolic st |                                   |             | 8  | 1.044 | 0.672080423 | 36.37       | 5778.9  | 6230.7  | 33.01  | 8.24  | High | High | High | High | High | High | 1    |   |
| FALSE | High   | Master Prq Q13523   | Peptidyl-H  | 0     | 14.138  | 16 | 2  | 2   | 2  | 179  | 19.2  | 8.73  | 9.57   | 2  | cell differe; cytosol; metal ion       | P01381, 51651    | ENSG000001PRH12    | 17               | UP-specific  |                                   |             | 4  | 1.044 | 0.71238508  | 10.51       | 630.5   | 674     | 15.96  | 9.2   | High | High | High | High | High | High | 1    |   |
| FALSE | High   | Master Prq Q13523   | heterogen   | 0     | 175.629 | 43 | 27 | 90  | 22 | 633  | 70.9  | 8.13  | 204.65 | 27 | metabolic; cytoplasm; protein bir      | P00076, F 10236  | ENSG000001HNRNP1   | 15               | CHR_HS       | mRNA Pro                          | mRNA Spli   | 5  | 1.044 | 0.915283071 | 5.33        | 19230.5 | 18970.8 | 5.59   | 5.13  | High | High | High | High | High | High | 1    |   |
| FALSE | High   | Master Prq Q13523   | Dnal home   | 0.003 | 3.13    | 7  | 2  | 2   | 2  | 304  | 34.7  | 8.53  | 40.9   | 2  | metabolic; cytoplasm; RNA bindi        | P00076, F 55192  | ENSG000001NAUC1    | 15               |              |                                   |             | 0  | 1.043 | 0.952635701 | 23.42       | 487.9   | 468     | 26.34  | 7.36  | High | High | High | High | High | High | 1    |   |
| FALSE | High   | Master Prq P51151   | Ras-relate  | 0     | 43.55   | 50 | 6  | 10  | 6  | 201  | 22.8  | 5.47  | 33.95  | 6  | regulation; cytosol;en                 | catalytic ai     | P00025, F 9367     | ENSG000001RAB8A  | 3            | Measles                           | Retrograd   |    | 10    | 1.043       | 0.52624103  | 15.26   | 2289    | 2107.2 | 9.86  | 4.29 | High | High | High | High | High | High | 1 |
| FALSE | High   | Master Prq Q14562   | Ubiquitin c | 0     | 21.881  | 20 | 4  | 8   | 4  | 309  | 33.4  | 5.77  | 28.52  | 4  | protein bir                            | P00400, F 56061  | ENSG000001UBD1     | 16               |              |                                   |             | 0  | 1.043 | 0.662235749 | 3.91        | 746.2   | 777     | 18.84  | 6.72  | High | High | High | High | High | High | 1    |   |
| FALSE | High   | Master Prq Q13523   | Isomorf 2   | 0     | 31.769  | 11 | 7  | 13  | 7  | 779  | 87.6  | 5.92  | 25.43  | 7  | cell organi; cytoskelet; protein bir   | P00373, F 2036   | ENSG000001EPH411   |                  |              |                                   |             |    |       |             |             |         |         |        |       |      |      |      |      |      |      |      |   |

|       |        |                     |             |       |        |      |    |    |    |      |       |      |       |    |              |            |             |           |       |           |         |    |             |             |            |    |       |             |       |        |        |       |       |       |      |      |      |      |      |      |   |
|-------|--------|---------------------|-------------|-------|--------|------|----|----|----|------|-------|------|-------|----|--------------|------------|-------------|-----------|-------|-----------|---------|----|-------------|-------------|------------|----|-------|-------------|-------|--------|--------|-------|-------|-------|------|------|------|------|------|------|---|
| FALSE | High   | Master Pcr P61019-1 | Ras-related | 0     | 43.263 | 33   | 5  | 13 | 5  | 212  | 23.5  | 6.54 | 37.27 | 5  | cell organi  | cytosol/en | catalytic a | P00009, F | S862  | ENSG00000 | RAB2A   | 8  | AMPK sign   | Focal Adh   | Golgi Cste | 10 | 1.04  | 0.886546264 | 27.92 | 2865.2 | 2755.9 | 23.11 | 6.35  | High  | High | High | High | High | High | High | 1 |
| FALSE | High   | Master Pcr Q99614   | tetratricor | 0     | 40.101 | 29   | 8  | 18 | 8  | 292  | 32.5  | 6.44 | 34.17 | 8  | metabolic    | cytosol/me | protein br  | P00515, F | 7265  | ENSG00000 | TTCL1   | 5  |             |             |            | 0  | 1.04  | 0.903384056 | 10.51 | 3200.9 | 3239.1 | 13.98 | 4.28  | High  | High | High | High | High | High | 1    |   |
| FALSE | High   | Master Pcr Q03169   | Tumor nec   | 0     | 11.429 | 6    | 4  | 4  | 4  | 654  | 72.6  | 4.86 | 4.87  | 4  | cell differe |            | protein br  | P06046    | 7127  | ENSG00000 | TNFAIP2 | 14 |             |             |            | 0  | 1.04  | 0.917867221 | 40.50 | 1580.5 | 1580.5 | 5.49  | 5.5   | High  | High | High | High | High | High | 1    |   |
| FALSE | High   | Master Pcr P20340-2 | Isomform 2  | 0     | 35.962 | 42   | 8  | 13 | 8  | 208  | 23.5  | 5.54 | 27.01 | 8  | cellular co  | cytosol/Go | catalytic a | P00009, F | 5870  | ENSG00000 | RAB6A   | 11 |             |             |            | 0  | 1.039 | 0.213408775 | 2.87  | 3417.1 | 3401   | 8.88  | 8.5   | High  | High | High | High | High | High | 1    |   |
| FALSE | High   | Master Pcr Q95249-1 | Glyc SNAP   | 0.003 | 2.942  | 4    | 1  | 1  | 1  | 250  | 28.6  | 9.42 | 16.9  | 1  | cell organi  | cytosol/Go | protein br  | P112352   | 9527  | ENSG00000 | GOSR1   | 17 | SNARE inte  | COP1-me     |            | 11 | 1.039 | 0.363649587 | 8.41  | 7611   | 733.5  | 13.05 | 6.83  | High  | High | High | High | High | High | 1    |   |
| FALSE | High   | Master Pcr Q9UKA9-1 | Polypyrini  | 0     | 9.908  | 10   | 3  | 3  | 3  | 531  | 57.5  | 6.86 | 6.98  | 3  | cell organi  | nucleus/s  | RNA bindi   | P00076, F | 58155 | ENSG00000 | PTRB2   | 1  | TarBasePal  |             |            | 2  | 1.039 | 0.451029955 | 21.18 | 895.5  | 839.2  | 79.62 | 13.36 | High  | High | High | High | High | High | 1    |   |
| FALSE | High   | Master Pcr Q98540   | Latexin [C  | 0     | 12.261 | 17   | 3  | 4  | 3  | 222  | 25.7  | 5.78 | 9.57  | 3  | defense re   | cytoplasm  | enzyme re   | P06907    | 56925 | ENSG00000 | LXN     | 3  |             |             |            | 0  | 1.039 | 0.472559254 | 25.94 | 864.4  | 874.9  | 46.65 | 12.61 | High  | High | High | High | High | High | 1    |   |
| FALSE | High   | Master Pcr Q13347   | Eukaryotic  | 0     | 8.974  | 56   | 12 | 24 | 32 | 325  | 36.5  | 6.54 | 67.96 | 12 | cell organi  | cytoplasm  | protein br  | P00400    | 8668  | ENSG00000 | EIF31   | 1  | RNA trans   | EGF/Transf  | Formation  | 13 | 1.039 | 0.81594975  | 5.23  | 4752.8 | 4459.7 | 8.73  | 2.88  | High  | High | High | High | High | High | 1    |   |
| FALSE | High   | Master Pcr Q13357   | Phosphatic  | 0     | 16.292 | 3    | 3  | 4  | 3  | 1258 | 138.5 | 6.54 | 6.64  | 3  | cell organi  | cytoplasm  | catalytic a | P00017, F | 3636  | ENSG00000 | INP1L1  | 1  | Inositid ph | EGF/EGFR    | Synthesis  | 20 | 1.039 | 0.859448883 | 24.49 | 1185.2 | 1212.5 | 16.02 | 6.57  | Synth | High | High | High | High | High | 1    |   |
| FALSE | High   | Master Pcr P36871-1 | Phosphogl   | 0     | 42.02  | 26   | 11 | 15 | 11 | 562  | 61.4  | 6.76 | 27.28 | 11 | metabolic    | cytoplasm  | catalytic a | P00406, F | 5236  | ENSG00000 | PGM1    | 1  | Pentose pl  | Ectoderm    | Neutrophil | 23 | 1.038 | 0.014204919 | 0.03  | 2839.1 | 2736.1 | 2.02  | 2.63  | High  | High | High | High | High | High | 1    |   |
| FALSE | High   | Master Pcr P14550   | alcohol de  | 0     | 16.353 | 19   | 5  | 7  | 5  | 325  | 36.6  | 6.79 | 11.50 | 5  | metabolic    | cytosol/me | catalytic a | P00248    | 10327 | ENSG00000 | AKR1A1  | 1  | Pentose al  | Benzo[al]A  | Catabolism | 12 | 1.038 | 0.412093023 | 8.98  | 545.9  | 523.2  | 22.31 | 6.6   | High  | High | High | High | High | High | 1    |   |
| FALSE | Medium | Master Pcr P29373   | Cellular re | 0.02  | 1.596  | 5    | 1  | 1  | 1  | 138  | 15.7  | 5.4  | 1.74  | 1  | metabolic    | cytoplasm  | protein br  | P00061, F | 1382  | ENSG00000 | CRABP2  | 1  | Vitamin A   | Signaling b |            | 4  | 1.038 | 0.45260215  | 11.98 | 517.1  | 400.9  | 16.03 | 21.18 | High  | High | High | High | High | High | 1    |   |
| FALSE | High   | Master Pcr P53365   | Arifapin-2  | 0     | 24.516 | 20</ |    |    |    |      |       |      |       |    |              |            |             |           |       |           |         |    |             |             |            |    |       |             |       |        |        |       |       |       |      |      |      |      |      |      |   |

|       |      |                   |             |       |         |    |    |    |    |      |       |      |       |      |                                     |                                  |                 |            |        |                          |              |    |       |             |             |         |         |       |       |      |      |      |      |      |      |        |  |
|-------|------|-------------------|-------------|-------|---------|----|----|----|----|------|-------|------|-------|------|-------------------------------------|----------------------------------|-----------------|------------|--------|--------------------------|--------------|----|-------|-------------|-------------|---------|---------|-------|-------|------|------|------|------|------|------|--------|--|
| FALSE | High | Master Prc Q14151 | scaffold at | 0     | 40.111  | 14 | 11 | 14 | 6  | 953  | 107.4 | 6.16 | 25.19 | 11   | cell differe cytoplasm; DNA bindi   | PI00076, P_9667                  | ENSG000001      | SAFB2      | 19     |                          |              | 0  | 1.032 | 0.628524714 | 21.8        | 817.8   | 835.8   | 20.47 | 3.32  | High | High | High | High | High | 1    | [K746; |  |
| FALSE | High | Master Prc P06756 | Integrin al | 0.002 | 3.644   | 2  |    | 2  | 2  | 1048 | 116.5 | 6.88 | 2.36  | 2    | cell differe cell surface metal ion | (PI01839, P_3685                 | ENSG000001      | ITGAV      | 2      | Small cell   Osteopontin | Integrin ce  | 48 | 1.032 | 0.6779263   | 33.16       | 684.6   | 606.7   | 24.62 | 9.43  | High | High | High | High | High | 1    |        |  |
| FALSE | High | Master Prc Q3NV98 | TBC1 dom    | 0     | 4.547   | 4  | 1  | 1  | 1  | 400  | 46.5  | 5.24 | 3.00  | 1    | regulation cytoplasm; enzyme re     | PI00556, P_54662                 | ENSG000001      | TBC1D13    | 9      |                          | TBC/RABG     | 4  | 1.032 | 0.681827068 | 24.8        | 315     | 323.5   | 21.37 | 3.41  | High | High | High | High | High | 1    |        |  |
| FALSE | High | Master Prc Q8TBK3 | SH3KBP1     | 0     | 7.917   | 4  | 2  | 2  | 2  | 1    | 707   | 76.3 | 8.28  | 4.12 | 2                                   | cell organi; vacuole protein bin | PI00214, P_9259 | ENSG000001 | SHKBP1 | 19                       |              |    | 0     | 1.032       | 0.716198618 | 34.42   | 717.2   | 720.4 | 27.24 | 6.72 | High | High | High | High | High | 1      |  |
| FALSE | High | Master Prc Q39956 | Dual spec   | 0     | 11.244  | 8  | 2  | 2  | 2  | 384  | 41.8  | 6.11 | 6.53  | 2    | metabolic cytoplasm; catalytic a    | PI00012, P_18799                 | ENSG000001      | DUSP9      | X      | MAPK sign                | Negative r   | 12 | 1.032 | 0.781490986 | 25.97       | 437.7   | 420.1   | 8.64  | 11.74 | High | High | High | High | High | 1    |        |  |
| FALSE | High | Master Prc Q39493 | Transducin  | 0     | 9.131   | 5  | 2  | 2  | 2  | 447  | 49.8  | 9.94 | 2.65  | 2    | cell commi endoplasm protein bin    | PI00400, P_26608                 | ENSG000001      | TBL2       | 7      |                          |              | 0  | 1.032 | 0.801246731 | 20.83       | 628.9   | 582.7   | 7.88  | 12.2  | High | High | High | High | High | 1    |        |  |
| FALSE | High | Master Prc Q43660 | Pleiotropic | 0     | 23.704  | 13 | 6  | 11 | 6  | 514  | 57.2  | 9.17 | 17.09 | 6    | cell organi; membrane catalytic a   | PI00400, P_5356                  | ENSG000001      | PLRG1      | 4      | Spliceosom               | mRNA Spal    | 5  | 1.032 | 0.884038555 | 11.12       | 630     | 601.7   | 15.53 | 0.94  | High | High | High | High | High | 1    |        |  |
| FALSE | High | Master Prc Q39213 | Glutathione | 0     | 18.901  | 19 | 4  | 5  | 4  | 226  | 25.5  | 8.61 | 11.39 | 4    | cell differe membrane antioxidant   | PI01323, P_37156                 | ENSG000001      | GSKT1      | 7      | Chemical C Metapathic    | Glutathione  | 10 | 1.032 | 0.906763837 | 15.87       | 222.02  | 2150.8  | 13.55 | 4.55  | High | High | High | High | High | 1    |        |  |
| FALSE | High | Master Prc P49419 | Alpha-am    | 0     | 76.409  | 33 | 14 | 24 | 14 | 539  | 58.5  | 7.99 | 73.39 | 14   | metabolic cytoplasm; catalytic a    | PI00017, P_13051                 | ENSG000001      | ALDH1A7    | 5      | Beta-Alani Amino Acids   | Lysine catal | 21 | 1.032 | 0.90089382  | 0.99        | 11550.5 | 11417.3 | 5.36  | 40.1  | High | High | High | High | High | 1    |        |  |
| FALSE | High | Master Prc P52565 | rho GDP-d   | 0     | 46.755  | 50 | 7  | 16 | 7  | 204  | 23.2  | 5.11 | 84.5  | 9    | cell organi; cytoplasm; enzyme re   | PI02115, P_396                   | ENSG000001      | ARGHUA     | 17     | Vasopressin              | Signalling i | 11 | 1.032 | 0.910223855 | 2.98        | 924.6   | 5334.9  | 5.3   | 4.03  | High | High | High | High | High | 1    |        |  |
| FALSE | High | Master Prc P07594 | nuclear por | 0     | 106.750 | 20 | 19 | 31 | 19 | 1391 | 155.1 | 6.16 | 41.94 | 19   | cell organi; membrane protein bin   | PI03177, P_9631                  | ENSG000001      | NUP155     | 5      | NASA trans               | Rev-media    | 64 | 1.032 | 0.915409599 | 4.88        | 7935.9  | 7699.6  | 8.13  | 2.23  | High | High | High | High | High | 1    |        |  |
| FALSE | High | Master Prc Q43684 | Mitotic ch  | 0     | 49.978  | 44 | 9  | 17 | 9  | 328  | 37.1  | 6.84 | 36.58 | 9    | cell division chromosom protein bin | PI00400, P_9184                  | ENSG000001      | BUB3       | 10     | Cell cycle   Cell Cycle  | Inactivation | 29 | 1.032 | 0.97688107  | 12.17       | 1851.7  | 1798.4  | 4.84  | 7.85  | High | High | High | High | High | 1    |        |  |
| FALSE | High | Master Prc P07594 | Reticulocal | 0     | 17.479  | 20 | 5  | 5  | 5  | 317  | 36.9  | 4.4  | 11.89 | 5    | endoplasm metal ion                 | (PI13499, P_5955                 | ENSG000001      | RCN2       | 15     |                          |              | 0  | 1.031 | 0.95126333  | 1.44        | 445     | 431.4   | 3.76  | 2.42  | High | High | High |      |      |      |        |  |

|       |        |                     |              |       |         |    |    |     |    |      |       |      |        |    |               |                         |         |            |            |          |    |             |             |             |        |             |         |         |         |       |       |      |      |      |      |      |      |      |   |
|-------|--------|---------------------|--------------|-------|---------|----|----|-----|----|------|-------|------|--------|----|---------------|-------------------------|---------|------------|------------|----------|----|-------------|-------------|-------------|--------|-------------|---------|---------|---------|-------|-------|------|------|------|------|------|------|------|---|
| FALSE | High   | Master Prq Q9NVC6   | mediator c   | 0     | 7.713   | 5  | 2  | 2   | 2  | 651  | 72.8  | 7.44 | 4.69   | 2  | metabolic     | membrane protein br     | PT01556 | 9440       | ENSG000001 | MED17    | 11 | Thyroid ho  | Transcripti | 10          | 1.026  | 0.905658437 | 9.6     | 640.5   | 624.4   | 9.67  | 2.56  | High | 1 |
| FALSE | High   | Master Prq Q9H7M9   | V-type imi   | 0     | 6.559   | 11 | 2  | 3   | 2  | 311  | 33.9  | 6.95 | 5.98   | 2  | metabolic     | membrane protein br     | 64115   | ENSG000001 | Clorf45A   | 10       | 0  | 1.026       | 0.934764796 | 9.26        | 1686.7 | 1716.8      | 5.06    | 11.58   | High    | High  | High  | High | High | High | High | 1    |      |      |   |
| FALSE | High   | Master Prq Q06052   | protein O-   | 0     | 47.342  | 14 | 9  | 12  | 9  | 916  | 102.8 | 4.91 | 33.76  | 9  | metabolic     | cytoplasm; catalytic ai | PT07555 | 10724      | ENSG000001 | MG6A5    | 10 | 1           | 1.026       | 0.970214053 | 6.28   | 1260.5      | 1334    | 6.76    | 5.15    | High  | High  | High | High | High | High | High | 1    |      |   |
| FALSE | High   | Master Prq Q13619-1 | culin-4A     | 0     | 28.762  | 12 | 8  | 9   | 7  | 759  | 87.6  | 8.13 | 22.22  | 8  | cell organi   | cytoplasm; catalytic ai | PT00888 | 8451       | ENSG000001 | CU1A4    | 13 | Nucleotide  |             | 17          | 1.025  | 0.278917428 | 0.83    | 1658.9  | 1462.1  | 6.85  | 9.51  | High | 1 |
| FALSE | High   | Master Prq Q04446   | 1,4-alpha-   | 0     | 25.179  | 11 | 7  | 8   | 7  | 702  | 80.4  | 6.32 | 15.32  | 7  | metabolic     | cytosol                 | PT00128 | 2632       | ENSG000001 | PEE1     | 3  | Metabolic   | Glycogen B  | 12          | 1.025  | 0.282520246 | 2.86    | 1462    | 1470.8  | 2.82  | 3.92  | High | 1 |
| FALSE | High   | Master Prq Q6RW13   | Type-1 ang   | 0     | 9.725   | 14 | 1  | 1   | 1  | 159  | 17.4  | 6.14 | 5.27   | 1  | regulation    | cytosol;em              | PT06396 | 57085      | ENSG000001 | ACTRAP   | 1  |             |             | 4           | 1.025  | 0.390269683 | 5.84    | 136.1   | 132     | 3.95  | 1.25  | High | 1 |
| FALSE | High   | Master Prq Q99755   | Phosphati    | 0     | 8.521   | 6  | 2  | 2   | 2  | 562  | 62.6  | 8.21 | 4.87   | 2  | cell differe  | cytoplasm; catalytic ai | PT01504 | 8394       | ENSG000001 | PP5K1A   | 1  | Metabolic   | B Cell Rece | 20          | 1.025  | 0.45351789  | 14.64   | 767.3   | 748.9   | 45.53 | 1.89  | High | 1 |
| FALSE | High   | Master Prq Q99999   | cytochrom    | 0     | 49.35   | 63 | 9  | 18  | 9  | 105  | 11.7  | 9.57 | 34.68  | 9  | cell death;   | cytosol;me              | PT00034 | 54205      | ENSG000001 | CYC5     | 7  | Hepatitis B | mRNA Reg    | 54          | 1.025  | 0.511389668 | 0.1     | 2727.1  | 2755.5  | 15.68 | 6.12  | High | 1 |
| FALSE | High   | Master Prq Q9P1A5   | Ribosome     | 0     | 16.075  | 14 | 3  | 8   | 3  | 250  | 28.7  | 8.75 | 10.9   | 3  | cell organi   | cytoplasm; protein br   | PD1172  | F 51119    | ENSG000001 | SBD5     | 7  | Ribosome    |             | 1           | 1.025  | 0.551901532 | 1.76    | 573.3   | 639.1   | 12.08 | 11.21 | High | 1 |
| FALSE | High   | Master Prq Q9NNW7   | thioredoxin  | 0     | 12.381  | 6  | 3  | 4   | 2  | 524  | 56.5  | 7.5  | 8.15   | 3  | cellular ho   | cytosol;mi              | PT00070 | 10587      | ENSG000001 | TXNRD2   | 22 | Pyrimidine  | Selenium P  | 8           | 1.025  | 0.630043126 | 2.91    | 311.7   | 310.7   | 13.88 | 10.8  | High | 1 |
| FALSE | High   | Master Prq Q06064-1 | Perlipin-3   | 0     | 164.074 | 69 | 22 | 49  | 22 | 434  | 47    | 5.44 | 150.63 | 22 | transport     | cytoplasm; protein br   | PT03036 | 10226      | ENSG000001 | PLIN3    | 19 | Triglycerid |             | 8           | 1.025  | 0.631247176 | 10.85   | 16189.6 | 15853.8 | 4.56  | 4.67  | High | 1 |
| FALSE | High   | Master Prq Q9UKM7   | endoplasm    | 0.003 | 3.474   | 2  | 1  | 1   | 1  | 699  | 79.5  | 7.72 | 2.37   | 1  | metabolic     | endoplasm               | PT01532 | 11253      | ENSG000001 | MAN1B1   | 9  | Metabolic   | ER Quality  | 13          | 1.025  | 0.645871451 | 28.77   | 344     | 380.9   | 27.82 | 20.11 | High | 1 |
| FALSE | High   | Master Prq Q9NZ53-1 | Podocalysi   | 0     | 5.623   | 2  | 1  | 4   | 1  | 605  | 65    | 4.34 | 6.71   | 1  | metabolic     | membrane protein br     | PT06365 | 50512      | ENSG000001 | PODXL2   | 1  |             | Cytosolic s | 4           | 1.025  | 0.690835127 | 39.24   | 164.7   | 163.5   | 21.8  | 24.42 | High | 1 |
| FALSE | Medium | Master Prq Q9H0K6   | Pseudouri    | 0.037 | 1.326   | 1  | 1  | 1   | 1  | 701  | 80.6  | 7.56 | 0      | 1  | metabolic     | catalytic ai            | PT01142 | 83448      | ENSG000001 | PUS7L    | 12 |             |             | 0           | 1.025  | 0.955040829 | 28.5    | 545.1   | 544.1   | 15.07 | 11.07 | High | 1 |
| FALSE | High   | Master Prq Q07021   | Compleme     | 0     | 59.678  | 36 | 8  | 17  | 8  | 282  | 31.3  | 4.84 | 56.8   | 8  | cell death;   | cell surface protein br | PT02330 | 708        | ENSG000001 | CLQB8    | 17 | Herpes sim  | Mesoderm    | 5           | 1.025  | 0.973571473 | 45.29   | 5147.6  | 5024.3  | 17.64 | 15.41 | High | 1 |
| FALSE | High   | Master Prq Q5RKV6   | Exosome c    | 0     | 16.329  | 28 | 5  | 5   | 5  | 272  | 28.2  | 6.28 | 9.93   | 15 | metabolic     | cytoplasm; catalytic ai | PD11138 | 118460     | ENSG000001 | EXOSC6   | 16 | RNA degra   | Major patf  | 15          | 1.025  | 0.979004286 | 14.9    | 614.7   | 599.6   | 6.83  | 6.87  | High | 1 |
| FALSE | High   | Master Prq S45652   | Heat shock   | 0     | 149.277 | 26 | 18 | 106 | 2  | 639  | 70    | 5.74 | 245.86 | 18 | cell differe  | cell surface nucleotide | PT00012 | F 3306     | ENSG000001 | HSPA2    | 14 | Protein prc | Parkin-Like | 24          | 1.024  | 0.305127756 | 1.39    | 63.9    | 60.8    | 3.61  | 5.75  | High | 1 |
| FALSE | High   | Master Prq Q9N3V8   | Guanine ni   | 0     | 28.035  | 15 | 7  | 7   | 7  | 582  | 65.5  | 8.44 | 17.31  | 7  | regulation    | cytosol;me              | PT01266 | F 54552    | ENSG000001 | GN3L1    | X  | Ribosome    |             | 1           | 1.024  | 0.411611962 | 5.57    | 1229.9  | 1201.1  | 16.91 | 7.12  | High | 1 |
| FALSE | High   | Master Prq Q9H3K6-1 | bola-like ep | 0     | 13.693  | 49 | 3  | 5   | 3  | 86   | 10.1  | 6.52 | 14.48  | 3  | cell organi   | cytoplasm; protein br   | PT01722 | 654483     | 5          | BOLA2B   | 8  | Gene and    |             | 5           | 1.024  | 0.458138415 | 7.13    | 731.2   | 713.8   | 7.08  | 1.43  | High | 1 |
| FALSE | High   | Master Prq Q14232   | Translatio   | 0     | 12.539  | 20 | 4  | 5   | 4  | 305  | 33.7  | 7.33 | 10.21  | 4  | metabolic     | cytoplasm; protein br   | PT01008 | 1967       | ENSG000001 | EIF2B1   | 16 | RNA trans   | Translator  | 7           | 1.024  | 0.526319495 | 21.67   | 1502.5  | 1535.5  | 37.76 | 5.31  | High | 1 |
| FALSE | High   | Master Prq Q9BU21   | Heterogen    | 0     | 47.077  | 15 | 11 | 16  | 11 | 856  | 95.7  | 6.92 | 33.81  | 11 | metabolic     | nucleus                 | PT00622 | F 11100    | ENSG000001 | HNRNPUL1 | 19 | Influenza A | mRNA Spli   | 5           | 1.024  | 0.609618347 | 3.5     | 3332    | 3255    | 4.69  | 8.01  | High | 1 |
| FALSE | High   | Master Prq Q26368   | Splicing fa  | 0     | 50.712  | 26 | 9  | 19  | 9  | 475  | 53.5  | 0.99 | 44.74  | 9  | metabolic     | nucleus;spi             | PT00076 | F 11338    | ENSG000001 | U2AF2    | 19 | Spliceosom  | mRNA Pro    | 13          | 1.024  | 0.710016175 | 13.09   | 7156.1  | 6975.5  | 5.87  | 5.36  | High | 1 |
| FALSE | High   | Master Prq P20339   | Ras-relate   | 0     | 43.779  | 48 | 7  | 14  | 5  | 215  | 23.6  | 8.15 | 39.97  | 7  | cell organi   | cytoplasm; catalytic ai | PT00009 | F 5868     | ENSG000001 | RAB5A    | 3  | Amyotrophi  | Amyotrophi  | 26          | 1.024  | 0.784636708 | 29.13   | 2160.7  | 2110.7  | 25    | 8.27  | High | 1 |
| FALSE | High   | Master Prq Q00429   | Dynamini-3   | 0     | 97.538  | 31 | 15 | 24  | 15 | 736  | 81.8  | 6.81 | 79.86  | 15 | cell death;   | cytoplasm; catalytic ai | PT00350 | F 10059    | ENSG000001 | MAN1B1   | 12 | TNF signali | Synaptic Vi | 6           | 1.024  | 0.84151373  | 0.33    | 2960.3  | 2890.5  | 7.5   | 4.43  | High | 1 |
| FALSE | High   | Master Prq Q10469   | Alpha-1,6-   | 0     | 16.435  | 12 | 3  | 3   | 4  | 447  | 51.5  | 8.76 | 10.25  | 14 | cellular ho   | Golgi;mem               | PT05660 | 4247       | ENSG000001 | MGAT2    | 14 | N-Glycan b  | Defective f | 12          | 1.023  | 0.362834304 | 2.71    | 814.1   | 796     | 10.98 | 1.69  | High | 1 |
| FALSE | High   | Master Prq Q00592   | Podocalysi   | 0     | 29.389  | 11 | 6  | 16  | 6  | 558  | 58.6  | 5.49 | 28.03  | 6  | cellular co   | cytoplasm; protein br   | PT05109 | F 5420     | ENSG000001 | PODXL    | 3  | Primary Fo  |             | 3           | 1.023  | 0.379825113 | 1.69    | 4250.2  | 4153.3  | 4.16  | 6.54  | High | 1 |
| FALSE | High   | Master Prq Q9Y6D0   | Serine/thio  | 0     | 67.083  | 34 | 14 | 20  | 8  | 443  | 49.3  | 5.69 | 42.31  | 14 | cell commu    | cytoplasm; catalytic ai | PT00069 | F 8428     | ENSG000001 | STK24    | 13 | Apoptotic   |             | 4           | 1.023  | 0.403902121 | 5.33    | 4954.2  | 4768.7  | 1     | 4.08  | High | High | High | High | High | High | 1    |   |
| FALSE | High   | Master Prq Q21953   | 2-oxoisoxa   | 0.002 | 3.729   | 3  | 1  | 1   | 1  | 392  | 43.3  | 6.29 | 2.95   | 7  | metabolic     | mitochondr              | PT02779 | F 594      | ENSG000001 | BCDHB3   | 6  | Propanoate  | Branch-ed   | 7           | 1.023  | 0.430205136 | 6.76    | 221.7   | 203.5   | 13.17 | 8.5   | High | 1 |
| FALSE | High   | Master Prq Q04726   | Transducin   | 0     | 45.613  | 17 | 9  | 12  | 7  | 772  | 83.4  | 7.2  | 25.25  | 9  | metabolic     | nucleus                 | PT00400 | F 7090     | ENSG000001 | TLE3     | 15 | White fat   | Repression  | 8           | 1.023  | 0.479131413 | 46.85   | 478.5   | 455.3   | 103.5 | 25.69 | High | 1 |
| FALSE | High   | Master Prq Q14444-1 | CAPRIN-1 C   | 0     | 92.076  | 24 | 14 | 46  | 14 | 709  | 78.3  | 5.25 | 111.75 | 14 | cell differe  | cytoplasm; protein br   | PT12287 | 4076       | ENSG000001 | EIF2B1   | 11 | 0           | 1.023       | 0.538860309 | 12.59  | 14040.6     | 13687.6 | 8.86    | 8.88    | High  | High  | High | High | High | High | High | 1    |      |   |
| FALSE | High   | Master Prq Q75369-8 | Isomform 8   | 0     | 592.965 | 43 | 89 | 202 | 83 | 2633 | 281.5 | 9.71 | 542.36 | 89 | cell organi   | cytoplasm; protein br   | PT00307 | F 2317     | ENSG000001 | FNLB     | 3  | VEGFA-VEG   |             | 1           | 1.023  | 0.557952554 | 10.67   | 60705   | 59313.8 | 7.2   | 2.89  | High | 1 |
| FALSE | High   | Master Prq Q04607-2 | Isomform 2   | 0     | 49.444  | 25 | 17 | 32  | 1  | 808  | 88.9  | 5.23 | 68.64  | 7  | metabolic     | catalytic ai            | PT01189 | F 4839     | ENSG000001 | NOP2     | 12 | Imatinib in |             | 1           | 1.023  | 0.619959242 | 14.75   | 3506.8  | 3143.5  | 11.39 | 6.99  | High | 1 |
| FALSE | High   | Master Prq Q92769   | Histone de   | 0     | 19.746  | 13 | 3  | 4   | 2  | 488  | 55.3  | 5.91 | 12.15  | 3  | cell differe  | chromosom               | PT00850 | 3066       | ENSG000001 | H2AC2    | 6  | Thyroid ho  | Cell Cycle  | 59          | 1.023  | 0.648405505 | 22.83   | 345.9   | 368     | 29.88 | 12.94 | High | 1 |
| FALSE | High   | Master Prq Q9H3K6   | RNA poly     | 0     | 42.019  | 18 | 10 | 14  | 10 | 665  | 75.7  | 6.84 | 24.7   | 10 | cell commu    | cytoplasm; catalytic ai | PT00515 | F 79657    | ENSG000001 | RPA13    | 12 |             |             | 0           | 1.023  | 0.661705871 | 12.74   | 7581.2  | 7563.2  | 8.34  | 3.16  | High | 1 |
| FALSE | High   | Master Prq Q12599   | Disks large  | 0     | 6.966   | 3  | 2  | 3   | 2  | 904  | 100.4 | 5.76 | 9.26   | 2  | cell commu    | cytoplasm; catalytic ai | PT00018 | F 1739     | ENSG000001 | DLG1     | 3  | T cell rece | Serine-Ric  | 20          | 1.023  | 0.713973868 | 18.56   | 2048.9  | 2064.8  | 13.92 | 2.82  | High | 1 |
| FALSE | High   | Master Prq P30048   | Thioredoxin  | 0     | 90.989  | 49 | 11 | 35  | 11 | 256  | 27.7  | 7.78 | 112.43 | 11 | cell death;   | cytoplasm; antioxidant  | PT00578 | F 10935    | ENSG000001 | PRDX3    | 10 |             | Dele        | 4           | 1.023  | 0.76017904  | 23.75   | 14590   | 14262.9 | 15.77 | 12.82 | High | 1 |
| FALSE | High   | Master Prq Q75400   | pre-mRNA     | 0     | 32.145  | 11 | 7  | 11  | 7  | 957  | 108.7 | 7.56 | 17.6   | 7  | cell division | cytosol;me              | PT00397 | F 55660    | ENSG000001 | PRPF40A  | 2  | Spliceosom  | mRNA Pro    | 6           | 1.023  | 0.853196366 | 3.38    | 1731.6  | 1821.9  | 5.95  | 4.5   | High | 1 |
| FALSE | High   | Master Prq Q14240-1 | eukaryotic   | 0     | 75.653  | 29 | 11 | 60  | 7  | 497  | 46.4  | 5.84 | 166.18 | 7  | metabolic     |                         |         |            |            |          |    |             |             |             |        |             |         |         |         |       |       |      |      |      |      |      |      |      |   |

|       |      |            |          |             |       |         |    |    |     |    |      |       |       |        |    |               |              |            |    |           |        |           |         |          |              |             |             |       |             |             |         |         |         |       |      |      |      |      |      |      |      |      |       |        |
|-------|------|------------|----------|-------------|-------|---------|----|----|-----|----|------|-------|-------|--------|----|---------------|--------------|------------|----|-----------|--------|-----------|---------|----------|--------------|-------------|-------------|-------|-------------|-------------|---------|---------|---------|-------|------|------|------|------|------|------|------|------|-------|--------|
| FALSE | High | Master Prq | Q98YQ3   | 39S riboso  | 0     | 15.542  | 15 | 3  | 4   | 3  | 311  | 34.9  | 9.72  | 8.27   | 3  | cell organ    | membrane     | protein    | br | P00573    | 51073  | ENSG00000 | MRPL4   | 19       | Ribosome     | Mitochond   | 7           | 1.018 | 0.538440513 | 0.2         | 906     | 1037.4  | 9.16    | 10.35 | High | 1    |       |        |
| FALSE | High | Master Prq | P07437   | tubulin bet | 0     | 404.89  | 83 | 29 | 233 | 5  | 444  | 49.6  | 4.89  | 644.41 | 29 | cell division | cytoplasm;   | catalytic  | ai | P00091, F | 203068 | ENSG00000 | TUBB    | 6, CHR_  | GAP juncti   | Pathogene   | Neutrophil  | 24    | 1.018       | 0.593524401 | 1.94    | 14788.6 | 14332.8 | 16.71 | 4.47 | High | 1     |        |
| FALSE | High | Master Prq | P22102-1 | trifunction | 0     | 162.107 | 38 | 28 | 42  | 28 | 1010 | 10.77 | 6.7   | 134.32 | 28 | metabolic     | cytoplasm;   | catalytic  | ai | P00051, F | 2618   | ENSG00000 | GAT     | 21       | Purine met   | Folate Met  | Purine ribc | 10    | 1.018       | 0.68441447  | 1.13    | 8327.7  | 8234.5  | 7.55  | 1.01 | High | 1     |        |
| FALSE | High | Master Prq | Q96106   | Mannose-6   | 0     | 7.255   | 6  | 2  | 2   | 2  | 420  | 46.3  | 7.21  | 5.78   | 2  | metabolic     | cytoplasm;   | catalytic  | ai | P00132, F | 29926  | ENSG00000 | GMPFA   | 3        | Fructose a   | Synthesis c | 9           | 1.018 | 0.752594599 | 27.33       | 185.8   | 210.1   | 26.85   | 11.45 | High | 1    |       |        |
| FALSE | High | Master Prq | Q15024   | Exosome c   | 0     | 10.73   | 12 | 3  | 3   | 3  | 291  | 31.8  | 5.19  | 6.33   | 3  | metabolic     | cytoplasm;   | catalytic  | ai | P01138, F | 23016  | ENSG00000 | EXSC7   | 3        | RNA degra    | Major pat   | 15          | 1.018 | 0.813260356 | 16.68       | 618     | 607.1   | 14.49   | 4.63  | High | 1    |       |        |
| FALSE | High | Master Prq | Q8TC79-1 | Minor hist  | 0     | 42.292  | 17 | 6  | 19  | 6  | 377  | 41.5  | 6.43  | 46.8   | 6  | cell organ    | cell surface | catalytic  | ai | P04458, F | 81502  | ENSG00000 | HML13   | 20       |              |             | 0           | 1.018 | 0.957391581 | 14.89       | 6289.1  | 6180.7  | 9.83    | 2.71  | High | 1    |       |        |
| FALSE | High | Master Prq | P12181-1 | Alpha-acti  | 0     | 163.39  | 38 | 27 | 97  | 14 | 892  | 10.3  | 5.41  | 226.97 | 27 | cell organ    | cytoplasm;   | metal ion  | l  | P00036, F | 871    | ENSG00000 | ACT1    | 14       | Regulation   | Arrhythmic  | Platelet de | 24    | 1.017       | 0.13126745  | 1.39    | 7121.1  | 6943.2  | 3.32  | 2.72 | High | 1     | [Q747] |
| FALSE | High | Master Prq | P49589-1 | Cysteine-t  | 0     | 31.351  | 11 | 8  | 10  | 8  | 748  | 85.4  | 6.76  | 29.94  | 8  | metabolic     | cytoplasm;   | catalytic  | ai | P01406, F | 833    | ENSG00000 | CARS    | 11, CHR_ | Aminoacyl    | Cytosolic t | 5           | 1.017 | 0.466014488 | 7.82        | 569.4   | 547.4   | 16      | 4.59  | High | 1    |       |        |
| FALSE | High | Master Prq | P46777   | 60S riboso  | 0     | 105.289 | 46 | 16 | 52  | 16 | 297  | 34.3  | 9.72  | 117.87 | 16 | cell organ    | cytoplasm;   | protein    | br | P00861, F | 6125   | ENSG00000 | RPL5    | 1        | Ribosome     | Cytoplasm   | Peptide ch  | 34    | 1.017       | 0.503659808 | 5.94    | 16832.2 | 15893.4 | 3.59  | 4.78 | High | 1     |        |
| FALSE | High | Master Prq | Q874W6-4 | GRB10-inb   | 0     | 35.424  | 7  | 7  | 8   | 7  | 1299 | 15.0  | 5.54  | 21.93  | 7  | cell differe  | cytoplasm;   | protein    | br | P00213    | 26058  | ENSG00000 | GIGYF2  | 2        |              |             | 0           | 1.017 | 0.534881402 | 36.3        | 707.1   | 695.2   | 57.07   | 15.11 | High | 1    |       |        |
| FALSE | High | Master Prq | P51452   | dual specif | 0     | 23.279  | 24 | 3  | 7   | 3  | 185  | 20.5  | 7.8   | 19.8   | 3  | metabolic     | cytosol;nu   | catalytic  | ai | P01002, F | 1845   | ENSG00000 | DUSP3   | 17       | MAPK sign    | ERKs are ir | 32          | 1.017 | 0.56709977  | 16.59       | 988     | 971.5   | 19.95   | 5.95  | High | 1    |       |        |
| FALSE | High | Master Prq | Q9BYN8   | 28S riboso  | 0     | 10.652  | 18 | 3  | 7   | 3  | 205  | 24.2  | 10.39 | 4.66   | 3  | cell organ    | membrane     | RNA bindi  | ng | P11493    | 64949  | ENSG00000 | MRPS26  | 20       |              | Mitochond   | 6           | 1.017 | 0.573948654 | 23.56       | 188.5   | 190.7   | 29.2    | 20.11 | High | 1    |       |        |
| FALSE | High | Master Prq | Q96C33   | FAS-associ  | 0     | 32.059  | 19 | 6  | 9   | 6  | 445  | 52.6  | 5.62  | 26.63  | 6  | cell organ    | cytoplasm;   | enzyme re  | g  | P00789, F | 23197  | ENSG00000 | FAF2    | 5        |              | Neutrophil  | 3           | 1.017 | 0.575318211 | 24.85       | 1056.6  | 1140.9  | 35.44   | 8.56  | High | 1    |       |        |
| FALSE | High | Master Prq | P50416   | Carnitine c | 0     | 48.687  | 17 | 12 | 18  | 12 | 773  | 88.3  | 8.65  | 37.16  | 12 | cell differe  | membrane     | catalytic  | ai | P00755    | 1374   | ENSG00000 | CTP1A   | 11       | Insulin resi | AMP-activ   | 25          | 1.017 | 0.579269069 | 4.26        | 3752.8  | 3666.2  | 5.44    | 2.17  | High | 1    |       |        |
| FALSE | High | Master Prq | P50502   | Hsc70-inte  | 0     | 73.131  | 30 | 12 | 31  | 12 | 369  | 41.3  | 5.27  | 66.46  | 12 | cell organ    | cytoplasm;   | nucleotide |    | P00515, F | 6767   | ENSG00000 | ST13    | 22       |              | Regulation  | 4           | 1.017 | 0.603399819 | 4.3         | 16885.3 | 16267.6 | 16.68   | 1.84  | High | 1    |       |        |
| FALSE | High | Master Prq | P61326   | Protein me  | 0     | 26.234  | 47 | 6  | 9   | 6  | 146  | 17.2  | 6.11  | 20.25  | 6  | metabolic     | cytoplasm;   | protein    | br | P002792   | 4116   | ENSG00000 | MAGOH   | 1        | RNA trans    | mRNA 3'-e   | 20          | 1.017 | 0.646337889 | 8.47        | 1267.4  | 1321.3  | 5       | 8.42  | High | 1    |       |        |
| FALSE | High | Master Prq | Q75792   | Ribonucleo  | 0     | 12.932  | 12 | 2  | 3   | 2  | 299  | 33.4  | 5.25  | 5.3    | 2  | metabolic     | cytosol;nu   | catalytic  | ai | P01351    | 10535  | ENSG00000 | RNA5H2A | 19       | DNA replic   |             | 1           | 1.017 | 0.733408945 | 18.21       | 329.4   | 339.5   | 14.37   | 4.49  | High | 1    |       |        |
| FALSE | High | Master Prq | Q6P062   | RNA poly    | 0     | 20.154  | 5  | 5  | 6   | 5  | 1173 | 133.4 | 6.77  | 10.21  | 5  | cell differe  | nucleus      | protein    | br | P08424, F | 9646   | ENSG00000 | CTR9    | 11       | Endosome     | E3 ubiquiti | 10          | 1.017 | 0.83493041  | 20.73       | 1377.3  | 1354    | 13.55   | 1.22  | High | 1    |       |        |
| FALSE | High | Master Prq | Q07812   | Apoptosis   | 0     | 6.344   | 6  | 1  | 3   | 1  | 192  | 21.2  | 5.22  | 4.45   | 1  | cell differe  | cytoplasm;   | protein    | br | P04052    | 581    | ENSG00000 | BAX     | 19       | Viral carc   | MyRAN Reg   | TP53 Regu   | 49    | 1.017       | 0.923737721 | 11.49   | 757.5   | 731.6   | 8.57  | 2.06 | High | 1     |        |
| FALSE | High | Master Prq | P52434   | DNA-direct  | 0     | 8.817   | 22 | 4  | 4   | 4  | 150  | 17.1  | 4.68  | 4.42   | 4  | metabolic     | cytosol;nu   | catalytic  | ai | P03870    | 5437   | ENSG00000 | POLR2H  | 3        | Purine met   | Eukaryotic  | Signaling b | 98    | 1.017       | 0.972434759 | 12.65   | 1354.8  | 1334    | 5.44  | 7.69 | High | 1     |        |
| FALSE | High | Master Prq | P22059   | Oxyesterol  | 0     | 31.33   | 12 | 6  | 8   | 6  | 807  | 89.4  | 7.3   | 17.41  | 6  | metabolic     | cytoplasm;   | protein    | br | P01069, F | 5007   | ENSG00000 | OSBP    | 11       |              | Synthesis c | 7           | 1.016 | 0.37123808  | 3.29        | 992     | 963.9   | 2.19    | 2.36  | High | 1    |       |        |
| FALSE | High | Master Prq | Q9BNU8   | Probable A  | 0     | 42.072  | 16 | 11 | 13  | 11 | 820  | 95.5  | 9.55  | 13.37  | 11 | cell organ    | cytoplasm;   | catalytic  | ai | P00270, F | 9416   | ENSG00000 | DXX3    | 12       | Spliceosom   | mRNA Spli   | 6           | 1.016 | 0.506065449 | 4.87        | 407.4   | 440.8   | 14.86   | 15.67 | High | 1    |       |        |
| FALSE | High | Master Prq | Q7Z5K2-1 | Wings apa   | 0     | 9.933   | 2  | 2  | 2   | 2  | 1190 | 132.9 | 5.44  | 5.97   | 2  | cell division | chromoso     | protein    | br | P07814    | 23063  | ENSG00000 | WAPAL   | W        | 10           |             | Cohesin Lo  | 12    | 1.016       | 0.566035582 | 17.7    | 927     | 912     | 19.11 | 8.85 | High | 1     |        |
| FALSE | High | Master Prq | Q9RT05   | Serine/thr  | 0     | 5.553   | 2  | 2  | 2   | 2  | 950  | 106.9 | 4.77  | 3.74   | 2  | metabolic     | cytoplasm;   | catalytic  | ai | 9989      |        | ENSG00000 | PPPAR1  | 18       |              |             | 0           | 1.016 | 0.566179677 | 3.31        | 257.1   | 286.4   | 7.56    | 12.69 | High | 1    |       |        |
| FALSE | High | Master Prq | Q000291  | Huntingtin  | 0     | 19.358  | 7  | 6  | 7   | 6  | 1037 | 116.1 | 5.3   | 9.76   | 6  | cell death;   | cytoplasm;   | catalytic  | ai | P00038, F | 3092   | ENSG00000 | HIP1    | 7        | Huntingtor   | Clathrin-m  | 4           | 1.016 | 0.572369582 | 2.48        | 992.2   | 1046.2  | 10.18   | 5.43  | High | 1    | [Q51] |        |
| FALSE | High | Master Prq | Q06888-1 | Protein Cu  | 0     | 8.708   | 18 | 2  | 3   | 2  | 179  | 19.1  | 5.5   | 5.87   | 2  | response t    | membrane     | metal ion  | l  | P03091    | 51596  | ENSG00000 | CUTP4   | 6, CHR_  | HS           |             | 0           | 1.016 | 0.583956202 | 5.87        | 874     | 860.4   | 4.8     | 9.13  | High | 1    |       |        |
| FALSE | High | Master Prq | Q75N03   | E3 ubiquiti | 0     | 5.799   | 4  | 1  | 1   | 1  | 491  | 54.5  | 8.29  | 3.54   | 1  | metabolic     | cytosol;nu   | catalytic  | ai | P00097, F | 79872  | ENSG00000 | CBLL1   | 7        |              | Intra-mem   | 4           | 1.016 | 0.591565296 | 10.84       | 423.9   | 423.3   | 11.75   | 1.11  | High | 1    |       |        |
| FALSE | High | Master Prq | P38435-1 | vitamin K   | 0.003 | 2.999   | 2  | 1  | 1   | 1  | 758  | 87.5  | 8.02  | 2.57   | 1  | coagulat      | endoplasm    | catalytic  | ai | P05090    | 2677   | ENSG00000 | GGCX    | 2        |              | Ubiquinol   | Gamma-ca    | 6     | 1.016       | 0.59957749  | 1.29    | 618.5   | 635.1   | 11.46 | 4.83 | High | 1     |        |
| FALSE | High | Master Prq | Q15371   | Eukaryotic  | 0     | 27.594  | 14 | 8  | 10  | 8  | 548  | 63.9  | 6.05  | 24.94  | 8  | cell organ    | cytoplasm;   | protein    | br | P05091    | 8664   | ENSG00000 | EIF3D   | 22       | RNA trans    | Translatior | Formation   | 13    | 1.016       | 0.652773021 | 1.77    | 1865    | 1871.5  | 2.3   | 7.5  | High | 1     |        |
| FALSE | High | Master Prq | P30825   | High affini | 0     | 14.691  | 7  | 3  | 6   | 3  | 629  | 67.6  | 5.43  | 16.82  | 3  | transport     | membrane     | protein    | br | P00324, F | 6541   | ENSG00000 | SLC7A1  | 13       | MicroRNA     | Amino aci   | 5           | 1.016 | 0.562915797 | 15.8        | 709.3   | 701.9   | 15.88   | 10.17 | High | 1    |       |        |
| FALSE | High | Master Prq | Q57FE4   | 5'-nucleoti | 0     | 37.952  | 27 | 8  | 8   | 8  | 455  | 51.8  | 6.35  | 22.21  | 8  | metabolic     | cytoplasm;   | catalytic  | ai | P05761    | 221294 | ENSG00000 | NTSDC1  | 6        |              |             | 0           | 1.016 | 0.661869874 | 8.74        | 887.4   | 911.6   | 12.57   | 5.8   | High | 1    |       |        |
| FALSE | High | Master Prq | P45880   | Voltage-de  | 0     | 101.283 | 56 | 14 | 33  | 14 | 294  | 31.5  | 7.56  | 88.71  | 14 | regulation    | membrane     | nucleotide |    | P01459    | 7417   | ENSG00000 | VDAC2   | 10       | Calcium sig  | Mitochond   | 12          | 1.016 | 0.7106401   | 3.27        | 5839.3  | 5667.2  | 9.3     | 2.17  | High | 1    |       |        |
| FALSE | High | Master Prq | Q153397  | Pumilio ho  | 0     | 19.209  | 13 | 5  | 5   | 5  | 648  | 73.5  | 9.64  | 11.13  | 5  | regulation    | chromoso     | DNA bindi  | ng | P07369, F | 9933   | ENSG00000 | KAOA020 | 9        |              |             | 0           | 1.016 | 0.801916425 | 4.19        | 815.8   | 802.7   | 0.45    | 6.86  | High | 1    |       |        |
| FALSE | High | Master Prq | Q14481-1 | RNA-bindin  | 0     | 75.01   | 30 | 13 | 24  | 13 | 530  | 59.3  | 10.1  | 66.97  | 13 | metabolic     | cytoskelet   | protein    | br | P07676, F | 9584   | ENSG00000 | RBM39   | 20       |              | mRNA Pro    | 1           | 1.016 | 0.805083666 | 13.57       | 4645.9  | 4454.7  | 14.15   | 42.5  | High | 1    |       |        |
| FALSE | High | Master Prq | P36954   | DNA-direct  | 0.009 | 2.178   | 18 | 1  | 1   | 1  | 125  | 14.5  | 5.14  | 0      | 1  | metabolic     | nucleus      | catalytic  | ai | P01096, F | 5438   | ENSG00000 | POLR2I  | 29       | Huntingtor   | Eukaryotic  | Signaling b | 75    | 1.016       | 0.806363188 | 14.83   | 29.9    | 29.4    | 13.55 | 3.44 | High | 1     |        |
| FALSE | High | Master Prq | P48059   | LM and se   | 0.003 | 3.473   | 4  | 1  | 1</ |    |      |       |       |        |    |               |              |            |    |           |        |           |         |          |              |             |             |       |             |             |         |         |         |       |      |      |      |      |      |      |      |      |       |        |

[illegible]

|       |      |            |          |              |       |         |    |    |     |    |      |       |       |        |    |             |                          |                 |            |           |    |           |              |             |           |           |       |             |             |       |         |         |       |       |      |      |      |      |      |      |      |   |
|-------|------|------------|----------|--------------|-------|---------|----|----|-----|----|------|-------|-------|--------|----|-------------|--------------------------|-----------------|------------|-----------|----|-----------|--------------|-------------|-----------|-----------|-------|-------------|-------------|-------|---------|---------|-------|-------|------|------|------|------|------|------|------|---|
| FALSE | High | Master Prq | Q09U63-1 | muskelin [l] | 0     | 7.101   | 4  | 2  | 2   | 2  | 735  | 84.7  | 6.34  | 2.64   | 2  | cell organ  | cytoplasm; protein br    | P00754, F 4289  | ENSG000001 | MXK1N     | 7  |           |              |             |           |           | 0     | 1.004       | 0.883501158 | 3.15  | 957.3   | 959.6   | 3.43  | 0.47  | High | 1 |
| FALSE | High | Master Prq | Q09Y16   | Hydroxytol   | 0     | 33.172  | 17 | 6  | 11  | 6  | 418  | 45.4  | 7.99  | 21.78  | 6  | metabolic   | membrane catalytic ac    | P00106, F 84263 | ENSG000001 | HSDF      | 10 |           |              |             |           |           | 0     | 1.004       | 0.934919741 | 53.35 | 1803    | 1795.9  | 23.07 | 15.48 | High | 1 |
| FALSE | High | Master Prq | Q09ZM1   | Myoflerin    | 0     | 380.281 | 43 | 75 | 131 | 75 | 2061 | 234.6 | 6.18  | 316.03 | 75 | cell organ  | membrane protein br      | P00106, F 26509 | ENSG000001 | MYOF      | 10 |           |              |             |           |           | 2     | 1.004       | 0.951361823 | 6.89  | 36905.5 | 36750.1 | 1.55  | 4.03  | High | 1 |
| FALSE | High | Master Prq | Q09061   | heme oxy     | 0     | 8.632   | 8  | 1  | 1   | 1  | 288  | 32.8  | 8.25  | 5.61   | 1  | cell comm   | cytosol;eme catalytic ac | P01216          | ENSG000001 | HMOX1     | 22 | MicroRNA  | NRF2 path    | Interleukin |           |           | 19    | 1.003       | 0.467791769 | 7.65  | 213.6   | 237.2   | 24.37 | 20.29 | High | 1 |
| FALSE | High | Master Prq | Q13939-1 | Beta-enola   | 0     | 84.996  | 29 | 9  | 76  | 4  | 434  | 47    | 7.71  | 182.5  | 9  | metabolic   | cytoplasm; catalytic ac  | P00113, F 3012  | ENSG000001 | ENO3      | 17 | Metabolic | Glycolysis   | Glucconeol  |           |           | 12    | 1.003       | 0.498507795 | 5.58  | 605.8   | 602.1   | 24.17 | 0.28  | High | 1 |
| FALSE | High | Master Prq | Q62826   | GTP-bindin   | 0     | 129.973 | 60 | 17 | 68  | 17 | 216  | 24.4  | 7.49  | 214.99 | 17 | cell divisi | chromosor catalytic ac   | P00025, F 5901  | ENSG000001 | RAN       | 12 | Ribosome  | Androgen     | MicroRNA    |           |           | 30    | 1.003       | 0.508556702 | 1.39  | 22363.5 | 22906.9 | 3.3   | 6.69  | High | 1 |
| FALSE | High | Master Prq | Q61956   | small ubiq   | 0     | 27.832  | 29 | 3  | 12  | 1  | 95   | 10.9  | 5.5   | 27.66  | 3  | metabolic   | nucleus catalytic ac     | P00340, F 6613  | ENSG000001 | SUMO2     | 17 | RNA trans | SLMOYlat     |             |           | 22        | 1.003 | 0.545457581 | 1.62        | 786   | 783.5   | 5.51    | 7.46  | High  | High | High | High | High | High | High | 1    |   |
| FALSE | High | Master Prq | Q09Y676  | 28S riboso   | 0     | 22.08   | 23 | 4  | 10  | 4  | 258  | 29.4  | 9.38  | 31.09  | 4  | cell organ  | membrane protein br      | P01084          | ENSG000001 | MRPS18B   | 6  | CHR_H5    | Vital cardis | Mitochond   |           |           | 7     | 1.003       | 0.597421105 | 3.21  | 2881.7  | 2972.6  | 5.99  | 2.21  | High | 1 |
| FALSE | High | Master Prq | Q42356   | phosphatic   | 0     | 11.723  | 1  | 1  | 3   | 1  | 2102 | 236.7 | 7.06  | 8.67   | 1  | cell organ  | cytoplasm; catalytic ac  | P00545, F 5297  | ENSG000001 | PA4A      | 22 | Metabolic | Ecdoderm     | Synthesis c |           |           | 10    | 1.003       | 0.740242834 | 24.46 | 204.6   | 228.8   | 23.25 | 9.73  | High | 1 |
| FALSE | High | Master Prq | Q06043   | Non-syndr    | 0     | 35.108  | 17 | 6  | 7   | 6  | 496  | 54.5  | 15.72 | 15.32  | 6  | cell death  | cytoplasm; catalytic ac  | P00598, F 1687  | ENSG000001 | OFAS, G5  | 7  |           |              |             |           |           | 0     | 1.003       | 0.762199622 | 27.94 | 940.8   | 937.8   | 18.79 | 9.74  | High | 1 |
| FALSE | High | Master Prq | Q09WV3   | Reticulon-   | 0     | 4.91    | 5  | 1  | 1   | 1  | 396  | 43.6  | 9.11  | 4.4    | 1  | metabolic   | membrane catalytic ac    | P00107, F 84816 | ENSG000001 | RTN4P1    | 16 |           |              |             |           |           | 0     | 1.003       | 0.781934551 | 9.49  | 452.2   | 459.5   | 9.51  | 1.36  | High | 1 |
| FALSE | High | Master Prq | Q21926   | CD9 anti-b   | 0     | 39.66   | 15 | 2  | 7   | 2  | 228  | 25.4  | 7.15  | 39.62  | 2  | cell organ  | cell surface protein br  | P00335          | ENSG000001 | CD9       | 12 | Hematopo  |              | Platelet de |           |           | 12    | 1.003       | 0.807271841 | 54.5  | 877.9   | 880     | 29.54 | 17.67 | High | 1 |
| FALSE | High | Master Prq | Q002127  | Dihydroorn   | 0     | 6.604   | 6  | 1  | 2   | 1  | 395  | 42.8  | 9.67  | 9.93   | 1  | metabolic   | cytoplasm; catalytic ac  | P01180          | ENSG000001 | DHODH     | 16 | Metabolic |              | Pyrimidine  |           |           | 6     | 1.003       | 0.820330321 | 23.86 | 424.6   | 423.5   | 11.11 | 9.03  | High | 1 |
| FALSE | High | Master Prq | Q56211   | cAMP-reg     | 0     | 14.744  | 17 | 2  | 6   | 1  | 112  | 12.3  | 9.09  | 13.35  | 2  | cell divisi | cytoplasm enzyme re      | P04667          | ENSG000001 | ARPP19    | 15 |           |              |             |           |           | 5     | 1.003       | 0.843763522 | 5.81  | 1691.7  | 1623.3  | 6.35  | 10.79 | High | 1 |
| FALSE | High | Master Prq | Q13148-1 | TAR DNA-     | 0     | 75.981  | 34 | 11 | 19  | 11 | 414  | 44.7  | 6.19  | 52.58  | 11 | cell organ  | cytoplasm; DNA bindi     | P00076, F 23435 | ENSG000001 | TARDBP    | 1  |           |              |             |           |           | 0     | 1.002       | 0.464686547 | 12.39 | 4298.8  | 4292.1  | 47.43 | 9.13  | High | 1 |
| FALSE | High | Master Prq | Q14789   | Golgim sub   | 0     | 89.134  | 9  | 23 | 27  | 23 | 3259 | 375.8 | 5     | 56.26  | 23 | cell organ  | Golgi;mem catalytic ac   | P01496, F 2804  | ENSG000001 | GOLG81    | 3  |           |              |             |           |           | 11    | 1.002       | 0.52455551  | 4.28  | 3174.3  | 3068.3  | 8.53  | 4.22  | High | 1 |
| FALSE | High | Master Prq | Q49959   | Double-str   | 0     | 11.757  | 6  | 4  | 6   | 4  | 708  | 80.5  | 5.9   | 14.97  | 4  | cell organ  | chromosor catalytic ac   | P00149, F 4361  | ENSG000001 | MOE11A, Y | 11 | Homologoi | miRNA Reg    | G2/M DNA    |           |           | 47    | 1.002       | 0.591944791 | 6.63  | 2085    | 2081.1  | 3.55  | 7.25  | High | 1 |
| FALSE | High | Master Prq | Q09052-1 | Zinc phos    | 0     | 19.331  | 7  | 5  | 6   | 5  | 826  | 92.2  | 7.9   | 11.27  | 5  | cell organ  | mitochond catalytic ac   | P00753, F 60528 | ENSG000001 | ELAC2     | 7  |           |              | tRNA proc   |           |           | 7     | 1.002       | 0.621080007 | 3.71  | 790.4   | 788.9   | 8.32  | 3.84  | High | 1 |
| FALSE | High | Master Prq | Q61011-1 | signal reco  | 0     | 21.73   | 10 | 5  | 7   | 5  | 504  | 55.7  | 8.75  | 13.84  | 5  | cell organ  | cytoplasm; catalytic ac  | P00448, F 6729  | ENSG000001 | SRP54     | 5  |           |              | Protein exp | miRNA Pro | SRP-depen | 5     | 1.002       | 0.65793306  | 8.27  | 1919.1  | 2014.7  | 8.28  | 6.02  | High | 1 |
| FALSE | High | Master Prq | Q43243   | Matrin-3 [l] | 0     | 214.987 | 48 | 37 | 91  | 37 | 847  | 94.6  | 6.25  | 262.98 | 37 | defense re  | membrane metal ion       | P00076, F 9782  | ENSG000001 | MATR3     | 14 |           |              |             |           |           | 0     | 1.002       | 0.699477083 | 6.3   | 19867.5 | 20151.1 | 2.7   | 5.28  | High | 1 |
| FALSE | High | Master Prq | Q09VH1-1 | Dnai hom     | 0     | 13.23   | 6  | 2  | 2   | 2  | 559  | 63.2  | 8.4   | 5.72   | 2  | cell organ  | membrane protein br      | P00226, F 55735 | ENSG000001 | DNAIC1    | 11 |           |              |             |           |           | 3     | 1.002       | 0.718537315 | 8.84  | 502.7   | 491.1   | 2.56  | 11.27 | High | 1 |
| FALSE | High | Master Prq | Q36915-1 | Guanine m    | 0     | 10.36   | 7  | 4  | 5   | 4  | 607  | 68.6  | 5.8   | 11     | 4  | regulation  | nucleus catalytic ac     | P01266, F 2794  | ENSG000001 | GNL1      | 6  | CHR_H5    |              |             |           |           | 0     | 1.002       | 0.844024226 | 5.61  | 736.4   | 703.7   | 13.04 | 11.92 | High | 1 |
| FALSE | High | Master Prq | Q14678-1 | KN motif a   | 0     | 21.319  | 5  | 4  | 5   | 4  | 1352 | 147.2 | 5.3   | 18.91  | 4  | cell organ  | cytoplasm; protein br    | P00203, F 23189 | ENSG000001 | KANK1     | 9  |           |              |             |           |           | 0     | 1.002       | 0.9449033   | 24.87 | 905.3   | 903.5   | 9.15  | 11.57 | High | 1 |
| FALSE | High | Master Prq | Q51665   | 26S protea   | 0     | 22.742  | 24 | 6  | 9   | 6  | 324  | 37    | 6.77  | 26.9   | 6  | metabolic   | cytosol;ext catalytic ac | P01398, F 5713  | ENSG000001 | PSM07     | 16 |           |              |             |           |           | 153   | 1.001       | 0.433597253 | 0.06  | 2147.4  | 2166.7  | 2.65  | 2.69  | High | 1 |
| FALSE | High | Master Prq | Q75083   | WD repeat    | 0     | 84.855  | 30 | 13 | 23  | 13 | 606  | 66.2  | 6.65  | 64.14  | 13 | cell differ | cytoplasm; protein br    | P00400, F 9948  | ENSG000001 | WDR1      | 4  |           |              |             |           |           | 5     | 1.001       | 0.505502444 | 1.02  | 4087.9  | 4042    | 3.02  | 2.14  | High | 1 |
| FALSE | High | Master Prq | Q75083-1 | Ubiquitin-1  | 0.001 | 4.471   | 51 | 2  | 2   | 2  | 85   | 9.1   | 9.31  | 51.61  | 2  | metabolic   | cytoplasm; protein br    | P03671          | ENSG000001 | UFM1      | 13 |           |              |             |           |           | 0     | 1.001       | 0.511474522 | 14.63 | 243.7   | 231     | 35.08 | 7.93  | High | 1 |
| FALSE | High | Master Prq | Q62304   | small nucle  | 0     | 10.656  | 17 | 2  | 8   | 2  | 92   | 10.8  | 9.44  | 11.75  | 2  | cell organ  | cytoplasm; protein br    | P01423          | ENSG000001 | SNRPE     | 1  |           |              |             |           |           | 16    | 1.001       | 0.513110038 | 2.11  | 1467.3  | 1465.8  | 6.97  | 2.02  | High | 1 |
| FALSE | High | Master Prq | Q09H47   | Probabke 2   | 0.006 | 2.431   | 1  | 1  | 1   | 1  | 919  | 10.3  | 6.93  | 0      | 1  | cell differ | cytosol;mi catalytic ac  | P00676, F 55526 | ENSG000001 | DHTKD1    | 10 |           |              |             |           |           | 4     | 1.001       | 0.52211383  | 2.14  | 499.4   | 464.9   | 7.28  | 6.79  | High | 1 |
| FALSE | High | Master Prq | Q11117   | Lysosomal    | 0     | 10.927  | 8  | 3  | 3   | 3  | 423  | 48.3  | 6.74  | 9.01   | 3  | cell organ  | membrane catalytic ac    | P00328          | ENSG000001 | ACP2      | 11 |           |              |             |           |           | 1     | 1.001       | 0.527728528 | 9.29  | 297     | 306.5   | 21.39 | 4.12  | High | 1 |
| FALSE | High | Master Prq | Q09UN25  | Leydig cell  | 0.002 | 3.878   | 14 | 2  | 3   | 2  | 99   | 10.6  | 11.55 | 18.82  | 2  | nucleus     |                          | P009495         | ENSG000001 | C19orf53  | 19 |           |              |             |           |           | 0     | 1.001       | 0.579839342 | 11.35 | 1368.8  | 1366.9  | 10.62 | 10.08 | High | 1 |
| FALSE | High | Master Prq | Q09H37   | Golgi resid  | 0     | 29.065  | 16 | 6  | 9   | 6  | 528  | 60.6  | 5.06  | 22.46  | 6  | metabolic   | Golgi;mem protein br     | P00373, F 64746 | ENSG000001 | ACOB      | 1  |           |              |             |           |           | 5     | 1.001       | 0.620782709 | 21.81 | 1852    | 1816.7  | 25.89 | 11.11 | High | 1 |
| FALSE | High | Master Prq | Q51731-1 | Cytocromo    | 0     | 15.819  | 22 | 3  | 4   | 3  | 125  | 14.1  | 8.25  | 9.64   | 3  | cell organ  | membrane catalytic ac    | P00297          | ENSG000001 | CAD3      | 6  |           |              |             |           |           | 2     | 1.001       | 0.64274736  | 14.42 | 363.4   | 340.3   | 14.36 | 6.79  | High | 1 |
| FALSE | High | Master Prq | Q09Y289  | 28S riboso   | 0     | 30.692  | 32 | 5  | 8   | 5  | 242  | 28.1  | 9.99  | 25.03  | 5  | cell organ  | membrane RNA bindi       | P00177          | ENSG000001 | MRP57     | 17 |           |              |             |           |           | 7     | 1.001       | 0.723518123 | 5.21  | 2972.7  | 2970.9  | 8.5   | 3.36  | High | 1 |
| FALSE | High | Master Prq | Q42221-1 | Signal tran  | 0     | 20.851  | 7  | 4  | 5   | 4  | 750  | 87.3  | 6.05  | 11.45  | 4  | cell death  | cytoplasm; DNA bindi     | P00017, F 6772  | ENSG000001 | MRP21     | 2  |           |              |             |           |           | 81    | 1.001       | 0.746557351 | 4.09  | 566.8   | 542.3   | 2.68  | 4.32  | High | 1 |
| FALSE | High | Master Prq | Q09583-4 | Isform 1     | 0     | 24.371  | 9  | 6  | 7   | 5  | 826  | 92.4  | 7.71  | 22.3   | 6  | cell organ  | cytoplasm; catalytic ac  | P00069, F 6732  | ENSG000001 | SRPK1     | 6  |           |              |             |           |           | 1     | 1.001       | 0.810949234 | 22.58 | 2629    | 2626    | 15.66 | 6.2   | High | 1 |
| FALSE | High | Master Prq | Q05145   | Actin-relat  | 0     | 6.393   | 14 | 3  | 4   | 3  | 178  | 20.5  | 8.99  | 2.25   | 3  | cell organ  | cytoplasm; protein br    | P04062          | ENSG000001 | ARPC3     | 12 |           |              |             |           |           | 23    | 1.001       | 0.901123468 | 9.84  | 1958.6  | 1956.8  | 3.12  | 4.36  | High | 1 |
| FALSE | High | Master Prq | Q06744   | glucose-6-   | 0     | 201.3   |    |    |     |    |      |       |       |        |    |             |                          |                 |            |           |    |           |              |             |           |           |       |             |             |       |         |         |       |       |      |      |      |      |      |      |      |   |



|       |      |                     |              |       |         |    |    |     |    |      |       |       |        |    |              |                           |                  |            |         |    |     |             |             |            |            |             |             |             |        |        |       |      |       |      |      |      |      |      |      |      |   |
|-------|------|---------------------|--------------|-------|---------|----|----|-----|----|------|-------|-------|--------|----|--------------|---------------------------|------------------|------------|---------|----|-----|-------------|-------------|------------|------------|-------------|-------------|-------------|--------|--------|-------|------|-------|------|------|------|------|------|------|------|---|
| FALSE | High | Master Prq Q9NY27   | Serine/thr   | 0     | 14.647  | 11 | 4  | 4   | 4  | 417  | 46.9  | 4.54  | 10.72  | 4  | metabolic    | cytoplasm; enzyme re      | P109184, F151987 | ENSG000001 | PP4R2   | 3  | 6   | CHR_HS      |             |            | Processing | 5           | 0.997       | 0.4903699   | 3.68   | 768.4  | 771   | 9.88 | 1.28  | High | 1 |
| FALSE | High | Master Prq Q95870.1 | Protein Ab   | 0.001 | 4.415   | 2  | 1  | 1   | 1  | 558  | 63.2  | 8.13  | 4.04   | 1  | metabolic    | membrane catalytic ac     | P00561, F7920    | ENSG000001 | ABHD16A | 11 | 6   |             |             |            |            | 0           | 0.997       | 0.505039756 | 6.36   | 283.4  | 294.6 | 8.25 | 10.34 | High | High | High | High | High | High | 1    |   |
| FALSE | High | Master Prq Q98R94   | Proteasom    | 0     | 13.849  | 9  | 3  | 3   | 3  | 392  | 42.2  | 6.32  | 7.98   | 3  | proteasom    | protein br                | P00400           | ENSG000001 | PAF1    | 11 | 0   | 0.997       | 0.543802588 | 4.21       | 576.7      | 574.8       | 6.59        | 10.95       | High   | High   | High  | High | High  | High | High | High | 1    |      |      |      |   |
| FALSE | High | Master Prq P25787   | Proteasom    | 0     | 61.89   | 52 | 9  | 23  | 9  | 234  | 25.9  | 7.43  | 56.72  | 9  | metabolic    | cytoplasm; catalytic ac   | P00227, F5683    | ENSG000001 | PSMA2   | 7  | 151 | Proteasom   | Proteasom   | Regulation | 151        | 0.997       | 0.563299392 | 6.26        | 5867.4 | 5600.5 | 10.24 | 4    | High  | High | High | High | High | High | 1    |      |   |
| FALSE | High | Master Prq Q9Y477.1 | plexin-D1    | 0     | 11.281  | 3  | 2  | 2   | 2  | 1925 | 21.9  | 7.15  | 8.27   | 2  | cell organ   | membrane protein br       | P01403, F23129   | ENSG000001 | PLXND1  | 1  | 4   | 0.997       | 0.670102285 | 9.77       | 331.6      | 326.7       | 3.06        | 10.06       | High   | High   | High  | High | High  | High | High | High | 1    |      |      |      |   |
| FALSE | High | Master Prq P30623.1 | isoform 2    | 0     | 57.838  | 13 | 16 | 18  | 13 | 1427 | 160.9 | 5.39  | 32.65  | 16 | cell differ  | chromosom catalytic ac    | P01302, F6249    | ENSG000001 | CLP1    | 12 | 1   | 0.997       | 0.679862751 | 49.94      | 1031.7     | 1046.6      | 39.51       | 4.01        | High   | High   | High  | High | High  | High | High | High | 1    |      |      |      |   |
| FALSE | High | Master Prq Q95736   | Synaptic ve  | 0     | 56.964  | 23 | 6  | 17  | 6  | 393  | 41.9  | 6.29  | 44.04  | 6  | metabolic    | cytoplasm; catalytic ac   | P00107, F10493   | ENSG000001 | VPS1    | 17 | 3   | 0.997       | 0.803696272 | 9.91       | 5300.3     | 5314        | 5.25        | 4.05        | High   | High   | High  | High | High  | High | High | High | 1    |      |      |      |   |
| FALSE | High | Master Prq Q9NV92   | Histone ch   | 0     | 10.155  | 17 | 2  | 2   | 2  | 202  | 22.4  | 4.56  | 8.48   | 2  | cell differ  | chromosom protein br      | P04729           | ENSG000001 | ASF1B   | 19 | 0   | 0.996       | 0.434531907 | 2.11       | 453.3      | 467.3       | 15.74       | 5.96        | High   | High   | High  | High | High  | High | High | High | 1    |      |      |      |   |
| FALSE | High | Master Prq Q8N758   | RNA polyn    | 0     | 11.719  | 7  | 3  | 3   | 3  | 531  | 59.9  | 4.63  | 7.93   | 3  | cell organ   | cytoplasm; protein br     | P03985           | ENSG000001 | PAF1    | 19 | 10  | 0.996       | 0.462749607 | 2.84       | 141        | 153.3       | 10.84       | 4.93        | High   | High   | High  | High | High  | High | High | High | 1    |      |      |      |   |
| FALSE | High | Master Prq Q14978.3 | isoform 3    | 0     | 193.017 | 46 | 28 | 88  | 1  | 700  | 73.7  | 9.47  | 212.49 | 28 | cell organ   | cytoplasm; nucleotide     | P05022           | ENSG000001 | NOLC1   | 10 | 0   | 0.996       | 0.50202858  | 17.73      | 382.4      | 453.7       | 23.39       | 28.45       | High   | High   | High  | High | High  | High | High | High | 1    |      |      |      |   |
| FALSE | High | Master Prq Q60678   | protein arg  | 0     | 10.263  | 7  | 3  | 4   | 3  | 531  | 59.8  | 5.35  | 8.84   | 3  | cell organ   | cytoplasm; catalytic ac   | P06325, F10196   | ENSG000001 | PRMT3   | 11 | 6   | 0.996       | 0.603182314 | 11.33      | 492.5      | 532.5       | 26.3        | 11.24       | High   | High   | High  | High | High  | High | High | High | 1    |      |      |      |   |
| FALSE | High | Master Prq Q72627   | E3 ubiquit   | 0     | 253.95  | 14 | 46 | 73  | 46 | 4374 | 481.6 | 5.22  | 195.31 | 46 | cell differ  | cytoplasm; catalytic ac   | P00632, F10075   | ENSG000001 | HUWE1   | 1  | 7   | 0.996       | 0.641888546 | 18.28      | 19554.3    | 19640.4     | 19.53       | 5.54        | High   | High   | High  | High | High  | High | High | High | 1    |      |      |      |   |
| FALSE | High | Master Prq P17706-1 | Tyrosine-p   | 0     | 10.436  | 6  | 2  | 2   | 2  | 415  | 48.4  | 8.29  | 2.12   | 2  | cell differ  | cytoplasm; catalytic ac   | P00102           | ENSG000001 | PTPN2   | 18 | 18  | Jak-STAT si | Negative r  | 5          | 0.996      | 0.684048247 | 3.52        | 517.4       | 531.9  | 7.06   | 2.6   | High | High  | High | High | High | High | High | High | 1    |   |
| FALSE | High | Master Prq P46459   | Vesicle-fus  | 0     | 26.414  | 12 | 6  | 10  | 6  | 744  | 82.5  | 6.95  | 24.76  | 6  | cell organ   | cytoplasm; catalytic ac   | P00004, F4905    | ENSG000001 | NSF     | 17 | 25  | 0.996       | 0.786332292 | 16.01      | 2422.1     | 2415.8      | 6.69        | 9.77        | High   | High   | High  | High | High  | High | High | High | 1    |      |      |      |   |
| FALSE | High | Master Prq P40616   | ADP-ribos    | 0     | 9.382   | 23 | 3  | 3   | 3  | 181  | 20.4  | 5.72  | 8.8    | 3  | cell organ   | cytoplasm; catalytic ac   | P00025, F400     | ENSG000001 | ARL1    | 12 | 4   | 0.996       | 0.795828431 | 19.9       | 678.6      | 718.3       | 10.31       | 11.42       | High   | High   | High  | High | High  | High | High | High | 1    |      |      |      |   |
| FALSE | High | Master Prq Q9NM63   | MICOS cor    | 0     | 15.349  | 14 | 3  | 4   | 3  | 227  | 26.1  | 8.28  | 10.99  | 3  | cell organ   | cytoplasm; protein br     | P05300, F54927   | ENSG000001 | CHCHD3  | 7  | 5   | 0.996       | 0.881710878 | 42.85      | 2299.2     | 2308.2      | 24.29       | 7.52        | High   | High   | High  | High | High  | High | High | High | 1    |      |      |      |   |
| FALSE | High | Master Prq P53004   | Biliverdin r | 0     | 33.786  | 26 | 7  | 10  | 7  | 296  | 33.4  | 6.44  | 27.87  | 7  | metabolic    | cytoplasm; catalytic ac   | P01408, F644     | ENSG000001 | BLVR4   | 12 | 4   | 0.995       | 0.481316692 | 0.79       | 2151.2     | 2217.3      | 8.33        | 7.1         | High   | High   | High  | High | High  | High | High | High | 1    |      |      |      |   |
| FALSE | Low  | Master Prq Q9UK24   | Teneurin-1   | 0.059 | 1.124   | 1  | 1  | 1   | 1  | 2725 | 304.8 | 6.42  | 0      | 1  | cell organ   | cytoplasm; protein br     | P06848, F10178   | ENSG000001 | TENM1   | X  | 0   | 0.995       | 0.544291803 | 13.5       | 37.9       | 43.2        | 27.61       | 10.18       | High   | High   | High  | High | High  | High | High | High | 1    |      |      |      |   |
| FALSE | High | Master Prq P84103   | Serine/arg   | 0     | 43.825  | 47 | 8  | 22  | 8  | 164  | 19.3  | 11.65 | 31.08  | 8  | metabolic    | cytoplasm; protein br     | P00076, F6428    | ENSG000001 | SRSF3   | 5  | 14  | 0.995       | 0.658200546 | 5.64       | 1489.5     | 1472.1      | 1           | 5.96        | High   | High   | High  | High | High  | High | High | High | 1    |      |      |      |   |
| FALSE | High | Master Prq Q96KR1   | Zinc finger  | 0     | 32.713  | 9  | 7  | 10  | 7  | 1074 | 116.9 | 9.04  | 22.01  | 7  | developm     | chromosom DNA bindi       | P07528, F51663   | ENSG000001 | ZFR     | 6  | 1   | 0.995       | 0.630464617 | 8.45       | 1450.6     | 1441.6      | 9.84        | 1.84        | High   | High   | High  | High | High  | High | High | High | 1    |      |      |      |   |
| FALSE | High | Master Prq P35241-1 | radixin [OS  | 0     | 178.566 | 49 | 34 | 91  | 18 | 583  | 68.5  | 6.37  | 164.2  | 34 | cell organ   | cytoplasm; protein br     | P00373, F5962    | ENSG000001 | RDX     | 11 | 8   | 0.995       | 0.689716555 | 8.93       | 6789.4     | 7112.2      | 11.84       | 2.45        | High   | High   | High  | High | High  | High | High | High | 1    |      |      |      |   |
| FALSE | High | Master Prq P37871-1 | T-complex    | 0     | 322.384 | 75 | 31 | 106 | 31 | 535  | 57.5  | 6.46  | 381.95 | 31 | cell organ   | cytoplasm; nucleotide     | P00118           | ENSG000001 | CTC2    | 12 | 16  | 0.995       | 0.747785788 | 11.52      | 31418.7    | 30632.3     | 9.87        | 4.26        | High   | High   | High  | High | High  | High | High | High | 1    |      |      |      |   |
| FALSE | High | Master Prq Q9Y649   | Signal pep   | 0     | 6.045   | 17 | 1  | 2   | 1  | 102  | 11.8  | 9.31  | 6.62   | 1  | metabolic    | endoplasm catalytic ac    | P06645           | ENSG000001 | SPC51   | 3  | 9   | 0.995       | 0.838818917 | 47.23      | 801.5      | 805.8       | 18.38       | 21.19       | High   | High   | High  | High | High  | High | High | High | 1    |      |      |      |   |
| FALSE | High | Master Prq Q95782   | AP-2 comp    | 0     | 59.769  | 16 | 11 | 14  | 6  | 977  | 107.5 | 7.03  | 46.59  | 11 | cell organ   | cytosol;me protein br     | P01602, F160     | ENSG000001 | AP2A1   | 19 | 48  | 0.995       | 0.851127788 | 23.04      | 1220.2     | 1192.8      | 16.49       | 6.72        | High   | High   | High  | High | High  | High | High | High | 1    |      |      |      |   |
| FALSE | High | Master Prq P62312   | U6 snRNA     | 0     | 6.229   | 14 | 1  | 4   | 1  | 80   | 9.1   | 9.58  | 7.7    | 1  | metabolic    | cytoplasm; protein br     | P01423           | ENSG000001 | LSM6    | 4  | 8   | 0.995       | 0.967967776 | 26.25      | 900.8      | 1082.7      | 27.03       | 10.85       | High   | High   | High  | High | High  | High | High | High | 1    |      |      |      |   |
| FALSE | High | Master Prq P62136-1 | serine/thru  | 0     | 6.58    | 48 | 13 | 25  | 3  | 330  | 37.5  | 6.33  | 79.01  | 3  | cell divisio | cytoplasm; catalytic ac   | P00149           | ENSG000001 | PP2CA   | 11 | 35  | 0.994       | 0.406576299 | 1.2        | 248.3      | 252.4       | 5.14        | 3.11        | High   | High   | High  | High | High  | High | High | High | 1    |      |      |      |   |
| FALSE | High | Master Prq Q15404-1 | Ras suppr    | 0     | 23.568  | 24 | 4  | 7   | 4  | 277  | 31.5  | 8.65  | 19.74  | 4  | regulation   | cytosol protein br        | P08757           | ENSG000001 | RSU1    | 10 | 4   | 0.994       | 0.469747766 | 4.82       | 1306.1     | 1354.8      | 3.69        | 11.93       | High   | High   | High  | High | High  | High | High | High | 1    |      |      |      |   |
| FALSE | High | Master Prq Q7265M-1 | Rab9 effec   | 0     | 13.686  | 8  | 2  | 2   | 2  | 372  | 40.5  | 6.25  | 61.2   | 2  | transport    | cytoplasm; protein br     | P01344, F10244   | ENSG000001 | RAB6P1  | 4  | 4   | 0.994       | 0.496894434 | 19.61      | 270.4      | 272.1       | 46.86       | 7.9         | High   | High   | High  | High | High  | High | High | High | 1    |      |      |      |   |
| FALSE | High | Master Prq Q9NCAS   | protein FA   | 0     | 32.106  | 10 | 4  | 5   | 3  | 519  | 55.4  | 9.03  | 19.7   | 4  | metabolic    | catalytic ac              | P01239           | ENSG000001 | FAM98A  | 2  | 0   | 0.994       | 0.533278463 | 11.28      | 387.6      | 362.7       | 20.49       | 11.6        | High   | High   | High  | High | High  | High | High | High | 1    |      |      |      |   |
| FALSE | High | Master Prq Q00499-2 | isoform IIB  | 0     | 59.186  | 20 | 7  | 14  | 7  | 518  | 56.5  | 5.12  | 40.67  | 7  | cell differ  | cytoplasm; protein br     | P00118, F274     | ENSG000001 | BIN1    | 2  | 1   | 0.994       | 0.563160466 | 17.57      | 2791.1     | 2807.5      | 28.58       | 1.49        | High   | High   | High  | High | High  | High | High | High | 1    |      |      |      |   |
| FALSE | High | Master Prq Q13769   | THO comp     | 0     | 10.773  | 5  | 3  | 4   | 3  | 683  | 78.5  | 6.87  | 117.1  | 3  | cell differ  | cytoplasm; protein br     | P09766           | ENSG000001 | THOC5   | 22 | 0   | 0.994       | 0.575243274 | 0.19       | 1785.8     | 1785.7      | 1.57        | 1.75        | High   | High   | High  | High | High  | High | High | High | 1    |      |      |      |   |
| FALSE | High | Master Prq P07951-1 | Tropomyos    | 0     | 63.92   | 38 | 14 | 31  | 1  | 284  | 32.8  | 4.7   | 55.8   | 14 | cell organ   | cytoplasm; protein br     | P00621, F7169    | ENSG000001 | PM2     | 5  | 8   | 0.994       | 0.580456113 | 9.77       | 93.4       | 96.9        | 5.85        | 11.96       | High   | High   | High  | High | High  | High | High | High | 1    |      |      |      |   |
| FALSE | High | Master Prq Q13131   | 5'-AMP-ac    | 0     | 11.815  | 10 | 4  | 4   | 4  | 559  | 64    | 8.12  | 7.82   | 4  | cell comm    | cytoplasm; catalytic ac   | P00609, F5562    | ENSG000001 | PKRAA1  | 5  | 41  | 0.994       | 0.581709297 | 16.34      | 144.2      | 152.9       | 14.45       | 13.89       | High   | High   | High  | High | High  | High | High | High | 1    |      |      |      |   |
| FALSE | High | Master Prq Q9H464   | Ketosamin    | 0     | 10.935  | 9  | 2  | 2   | 2  | 309  | 34.4  | 7.33  | 7.27   | 2  | metabolic    | cytosol catalytic ac      | P01636, F79672   | ENSG000001 | ARGKRP  | 17 | 3   | 0.994       | 0.657203042 | 23.3       | 535.1      | 538.4       | 21.09       | 7.23        | High   | High   | High  | High | High  | High | High | High | 1    |      |      |      |   |
| FALSE | High | Master Prq Q104907  | Rax1-bind    | 0     | 21.133  | 33 | 3  | 3   | 3  | 124  | 13.7  | 8.48  | 10.58  | 3  | regulation   | cytoplasm; protein br     | P00595, F30851   | ENSG000001 | TAXBP3  | 17 | 4   | 0.994       | 0.69549938  | 28.73      | 718.4      | 718.4       | 30.14       | 10.88       | High   | High   | High  | High | High  | High | High | High | 1    |      |      |      |   |
| FALSE | High | Master Prq P62820   | Tax-relate   | 0     | 70.477  | 60 | 13 | 28  | 6  | 205  | 22.7  | 6.21  | 65.62  | 13 | cell organ   | cytoplasm; catalytic ac   | P00009, F5861    | ENSG000001 | RAB1A   | 2  | 21  | 0.994       | 0.780758201 | 7.18       | 2438.1     | 2461.1      | 3.42        | 3.06        | High   | High   | High  | High | High  | High | High | High | 1    |      |      |      |   |
| FALSE | High | Master Prq P62913   | 60S riboso   | 0     | 45.34   | 43 | 9  | 27  | 9  | 178  | 20.2  | 9.6   | 47.25  | 9  | cell differ  | cytoplasm; protein br     | P00189, F6135    | ENSG000001 | RLP11   | 1  | 34  | 0.994       | 0.976707852 | 23.74      | 7528.5     | 7573.9      | 8.71        | 8.73        | High   | High   | High  | High | High  | High | High | High | 1    |      |      |      |   |
| FALSE | High | Master Prq P04083   | annexin A1   | 0     | 193.652 | 69 | 24 | 105 | 24 | 346  | 38.7  | 7.02  | 305.75 | 24 | cell organ   | cell surface catalytic ac | P00191           | ENSG000001 | ANXA1   | 9  | 20  | 0.994       | 0.98710686  | 17.21      | 32606.8    | 32808.3     | 5.44        | 7.25        | High   | High   | High  | High | High  | High | High | High | 1    |      |      |      |   |
| FALSE | High | Master Prq Q9UM06   | Dual speci   | 0     | 11.43   | 10 | 2  | 2   | 2  | 340  | 37.7  | 6.84  | 7.78   | 2  | metabolic    | cytoplasm; catalytic ac   | P00782           | ENSG000001 | DUSP12  | 1  | 0   | 0.9         |             |            |            |             |             |             |        |        |       |      |       |      |      |      |      |      |      |      |   |



|       |        |                     |             |       |         |    |    |     |    |      |       |       |         |    |              |              |              |                |            |            |           |         |         |             |             |             |            |             |             |             |         |         |         |       |      |      |      |      |      |      |      |      |      |   |
|-------|--------|---------------------|-------------|-------|---------|----|----|-----|----|------|-------|-------|---------|----|--------------|--------------|--------------|----------------|------------|------------|-----------|---------|---------|-------------|-------------|-------------|------------|-------------|-------------|-------------|---------|---------|---------|-------|------|------|------|------|------|------|------|------|------|---|
| FALSE | High   | Master Prq Q3ZC08   | Mitochond   | 0     | 40.836  | 21 | 7  | 12  | 7  | 353  | 39.6  | 8.37  | 23.96   | 7  | cell organi  | membrane     | catalytic ac | P03301, 92609  | ENSG000001 | TMM50      | 19        |         |         |             | Mitochond   | 2           | 0.985      | 0.782195605 | 4.01        | 1715.6      | 1778.3  | 6.73    | 3.2     | High  | High | High | High | High | High | High | High | 1    |      |   |
| FALSE | High   | Master Prq Q96K17-1 | transcripti | 0     | 15.046  | 27 | 3  | 3   | 2  | 158  | 17.3  | 6.35  | 9.72    | 3  |              |              | protein bin  | P01849         | 91408      | ENSG000001 | BTFL3A    | 1       |         |             |             |             | 0          | 0.985       | 0.844742023 | 5.61        | 328.6   | 321.9   | 3.58    | 9.87  | High | 1    |   |
| FALSE | High   | Master Prq Q99023   | 60S riboso  | 0     | 177.395 | 62 | 26 | 78  | 26 | 403  | 46.1  | 10.18 | 180.81  | 26 | cell organi  | cytoplasm;   | protein bin  | P00297         | 6122       | ENSG000001 | P9031     | 22      |         |             | Ribosome    | Cytoplasm   | Peptide ch | 34          | 0.985       | 0.85114843  | 7.96    | 24640.4 | 27001.8 | 0.43  | 6.6  | High | 1 |
| FALSE | High   | Master Prq Q15437   | protein tra | 0     | 60.888  | 17 | 9  | 14  | 7  | 767  | 86.4  | 6.89  | 47.33   | 9  | transport    | cytoplasm;   | metal ion    | P00626, 10483  | ENSG000001 | SEC23B     | 30        |         |         | Endocyt     | Sterol Reg  |             | 2          | 0.985       | 0.878662115 | 18.57       | 1517.2  | 1565.8  | 14.96   | 1.34  | High | 1    |   |
| FALSE | High   | Master Prq Q06751   | RUN and F   | 0     | 20.309  | 7  | 4  | 8   | 4  | 708  | 79.8  | 5.74  | 14.63   | 4  | metabolic    | cytoplasm;   | metal ion    | P01363, 80230  | ENSG000001 | RUF1       | 5         | CHR, HC | Endocyt | Synthesis c |             | 6           | 0.985      | 0.879560478 | 27.96       | 1517.8      | 1480.9  | 12.38   | 16.36   | High  | High | High | High | High | High | High | High | 1    |      |   |
| FALSE | High   | Master Prq Q94906-1 | Pre-mRNA    | 0     | 93.542  | 29 | 23 | 34  | 23 | 941  | 106.9 | 8.25  | 72.48   | 23 | cell organi  | membrane     | protein bin  | P06424, 72148  | ENSG000001 | PRPF6      | 20        |         |         | Spliceosom  | mRNA Pro    | mRNA Spli   | 7          | 0.985       | 0.986001896 | 13.12       | 7459.9  | 7573.1  | 7.88    | 3.05  | High | 1    |   |
| FALSE | High   | Master Prq Q94911   | elongation  | 0     | 157.948 | 59 | 22 | 63  | 22 | 452  | 49.9  | 7.61  | 150.47  | 22 | metabolic    | membrane     | catalytic ac | P00400, 10607  | ENSG000001 | TUFM       | 16        |         |         | Mitochond   |             |             | 4          | 0.984       | 0.151124607 | 0.89        | 18828   | 18994.1 | 0.91    | 0.46  | High | 1    |   |
| FALSE | High   | Master Prq Q98238   | Heat shock  | 0     | 640.657 | 71 | 68 | 446 | 24 | 724  | 83.2  | 5.03  | 1169.1  | 68 | cell organi  | cell surface | enzyme re    | P00083, 73326  | ENSG000001 | HP90A81    | 6         |         |         | Prostate c  | NR2F path   | semalSA Pi  | 42         | 0.984       | 0.293796434 | 0.35        | 25587.7 | 25992.1 | 7.63    | 1.42  | High | 1    |   |
| FALSE | High   | Master Prq Q9UHQ9   | NADH-cyt c  | 0     | 11.845  | 10 | 2  | 2   | 2  | 305  | 34.1  | 9.88  | 3.14    | 2  | metabolic    | membrane     | catalytic ac | P00175, 71706  | ENSG000001 | CYBSR1     | 1         |         |         | Amino su    | Oxidation   | Platelet de | 9          | 0.984       | 0.436667452 | 5.43        | 808.5   | 849.2   | 9.77    | 5.66  | High | 1    |   |
| FALSE | High   | Master Prq Q99023   | 3-oxoacyl-c | 0     | 13.717  | 9  | 2  | 2   | 2  | 459  | 48.8  | 7.66  | 8.69    | 2  | metabolic    | cytosol;mi   | catalytic ac | P00108, 74995  | ENSG000001 | OKSM       | 3         |         |         | Metabolic   |             |             | 4          | 0.984       | 0.489672252 | 18.98       | 52.3    | 60.7    | 9.06    | 39.36 | High | 1    |   |
| FALSE | High   | Master Prq Q00765   | Receptor e  | 0     | 16.119  | 15 | 4  | 8   | 4  | 189  | 21.5  | 8.1   | 8.82    | 4  | metabolic    | endoplasm    | protein bin  | P01314         | 7905       | ENSG000001 | REEP5     | 5       |         |             | Olfactory s |             | 4          | 0.984       | 0.490305886 | 5.17        | 1299.8  | 1351.3  | 5.82    | 6.18  | High | 1    |   |
| FALSE | High   | Master Prq Q12788   | Transducin  | 0     | 39.67   | 14 | 6  | 7   | 6  | 808  | 89    | 6.9   | 18.67   | 6  | metabolic    | nucleus      | protein bin  | P00400, 10607  | ENSG000001 | TBL3       | 16        |         |         | Ribosome    | Major pat   |             | 6          | 0.984       | 0.55122581  | 10.87       | 1088.5  | 1103.2  | 26.05   | 4.46  | High | 1    |   |
| FALSE | High   | Master Prq Q86V48-1 | Leucine zip | 0     | 23.603  | 6  | 4  | 5   | 4  | 1076 | 120.2 | 8.5   | 14.86   | 4  | metabolic    | membrane     |              | P04111         | 7798       | ENSG000001 | LUZP1     | 1       |         |             |             |             | 0          | 0.984       | 0.551903409 | 40.14       | 670.5   | 681.2   | 53.66   | 13.08 | High | 1    |   |
| FALSE | High   | Master Prq Q8N1P7   | beta/gamr   | 0     | 9.48    | 4  | 1  | 1   | 1  | 616  | 68.6  | 5.1   | 4.68    | 1  |              |              |              | P00030, 755057 | ENSG000001 | AIM1L; CR  | 1         |         |         |             |             | 0           | 0.984      | 0.583815295 | 7.65        | 305.9       | 306.6   | 6.67    | 1.09    | High  | High | High | High | High | High | High | High | 1    |      |   |
| FALSE | High   | Master Prq Q16181   | Septin-7 (C | 0     | 29.298  | 18 | 8  | 10  | 8  | 437  | 50.6  | 8.63  | 23.83   | 8  | cell differe | chromosom    | nucleotide   | P00735, 7989   | ENSG000001 | SEPT7      | 7         |         |         | MAPK6/M     |             | 3           | 0.984      | 0.587427043 | 5.14        | 3896.1      | 3960.4  | 11.8    | 3.88    | High  | High | High | High | High | High | High | High | 1    |      |   |
| FALSE | High   | Master Prq Q14880   | Microsomi   | 0     | 26.343  | 16 | 2  | 3   | 2  | 152  | 16.5  | 9.38  | 15.73   | 2  | metabolic    | endoplasm    | antioxidan   | P01124         | 4259       | ENSG000001 | MGST3     | 1       |         |             | Drug meta   | NR2F path   | Glutathion | 12          | 0.984       | 0.689544835 | 7.25    | 260.6   | 228.3   | 9.06  | 13.2 | High | 1 |
| FALSE | High   | Master Prq Q8TA76-1 | Nuclear pr  | 0     | 31.241  | 9  | 4  | 6   | 4  | 608  | 68.1  | 6.38  | 14.62   | 4  | cell organi  | cytoplasm;   | metal ion    | P05020, 75566  | ENSG000001 | NPLOC4     | 2         |         |         | Protein prc | Translesio  |             | 5          | 0.984       | 0.711728166 | 16.29       | 1465.2  | 1390.8  | 15.39   | 5.03  | High | 1    |   |
| FALSE | High   | Master Prq Q890V3   | Putative ri | 0     | 6.011   | 6  | 1  | 1   | 1  | 343  | 38.3  | 7.85  | 4.95    | 1  | metabolic    | mitochond    | catalytic ac | P02033, 79863  | ENSG000001 | RBFA       | 18        |         |         |             |             | 0           | 0.984      | 0.740954833 | 39.96       | 382.5       | 388.8   | 26.01   | 19      | High  | High | High | High | High | High | High | High | 1    |      |   |
| FALSE | High   | Master Prq Q8BW12   | PEST prote  | 0     | 59.591  | 53 | 8  | 17  | 8  | 178  | 18.9  | 7.49  | 44.86   | 8  | metabolic    | nucleus      | protein bin  | P115473        | 57092      | ENSG000001 | PCNP      | 3       |         |             |             |             | 0          | 0.984       | 0.762719499 | 20.45       | 5720.6  | 5816.3  | 17.96   | 3.38  | High | 1    |   |
| FALSE | High   | Master Prq Q94903   | Pyridoxal p | 0.009 | 2.128   | 3  | 1  | 1   | 1  | 275  | 30.3  | 7.5   | 2.55    | 1  | cytoplasm;   |              |              | P01168         | 11212      | ENSG000001 | PROSC; PU | 8       |         |             |             |             | 0          | 0.984       | 0.836108611 | 18.15       | 397.2   | 403.5   | 13.16   | 1.1   | High | 1    |   |
| FALSE | High   | Master Prq Q9P2N5   | RNA-bindin  | 0     | 6.535   | 2  | 2  | 2   | 2  | 1060 | 118.6 | 9.19  | 1.65    | 2  | metabolic    | cytoplasm;   | metal ion    | P00076, 75439  | ENSG000001 | RBMT2      | 7         |         |         |             |             | 0           | 0.984      | 0.850867592 | 0.78        | 2186.4      | 2118.7  | 21.11   | 22.38   | High  | High | High | High | High | High | High | High | 1    |      |   |
| FALSE | High   | Master Prq Q9P2P3   | Aldheyde c  | 0     | 18.572  | 15 | 6  | 7   | 5  | 517  | 57.2  | 6.8   | 17.58   | 6  | metabolic    | mitochond    | catalytic ac | P00171         | 219        | ENSG000001 | ALDH1B1   | 9       |         |             | Tryptophan  | Ethanol ox  | 17         | 0.984       | 0.92205273  | 31.43       | 826.2   | 839.6   | 21.93   | 4.28  | High | 1 |
| FALSE | High   | Master Prq Q9UHD1   | cysteine ar | 0     | 78.117  | 48 | 12 | 24  | 12 | 332  | 37.5  | 7.87  | 71.94   | 12 | metabolic    |              | metal ion    | P04068, 76293  | ENSG000001 | CHORDC1    | 11        |         |         |             |             | 0           | 0.984      | 0.926488378 | 14.07       | 7031.2      | 7147.4  | 7.02    | 3.73    | High  | High | High | High | High | High | High | High | 1    |      |   |
| FALSE | High   | Master Prq Q9P2E9-1 | Enhancer c  | 0     | 32.429  | 5  | 5  | 7   | 5  | 1401 | 151.6 | 5.86  | 25.06   | 5  | metabolic    | cytoplasm;   | protein bin  | P00400         | 23644      | ENSG000001 | EDC4      | 16      |         |             | RNA degra   | mRNA dec    | 4          | 0.984       | 0.965411418 | 12.94       | 1403.7  | 1470.1  | 12.25   | 3.28  | High | 1 |
| FALSE | High   | Master Prq Q9UHQ3-1 | Gamma-ta    | 0     | 16.503  | 13 | 5  | 6   | 5  | 528  | 60.5  | 7.52  | 7.84    | 5  | metabolic    | cytoplasm;   | protein bin  | P09728         | 55787      | ENSG000001 | TXLNK     | X       |         |             |             | 0           | 0.983      | 0.340473184 | 3.57        | 398.2       | 405.2   | 2.02    | 4.68    | High  | High | High | High | High | High | High | High | High | 1    |   |
| FALSE | Medium | Master Prq Q15047   | Histone-ly  | 0.028 | 1.457   | 1  | 1  | 2   | 1  | 1291 | 143.1 | 6.02  | 1.96    | 1  | cell organi  | chromosom    | catalytic ac | P00856, 79869  | ENSG000001 | SETD81     | 1         |         |         | Lysine deg  | Histone M   | PKMTs me    | 6          | 0.983       | 0.504950508 | 22.19       | 714.4   | 724.4   | 3.67    | 46.01 | High | 1    |   |
| FALSE | High   | Master Prq P17535   | Transcripti | 0     | 17.284  | 12 | 3  | 4   | 2  | 347  | 35.2  | 7.37  | 14.5    | 3  | metabolic    | chromosom    | DNA bindin   | P00170, 73727  | ENSG000001 | JUND       | 19        |         |         | MAPK sign   | Corticoste  |             | 10         | 0.983       | 0.509375766 | 2.54        | 200.6   | 199.1   | 14.29   | 7.45  | High | 1    |   |
| FALSE | High   | Master Prq P06733-1 | alpha-enol  | 0     | 60.886  | 81 | 40 | 410 | 14 | 434  | 47.1  | 7.39  | 1039.59 | 40 | metabolic    | cell surface | catalytic ac | P00113, 72023  | ENSG000001 | ENO1       | 1         |         |         | Biosynthes  | Glycolysis  | Gluconeog   | 12         | 0.983       | 0.567317991 | 7.72        | 36285   | 36925.3 | 4.57    | 3.09  | High | 1    |   |
| FALSE | High   | Master Prq P49459-1 | Ubiquitin   | 0     | 0.802   | 18 | 2  | 2   | 2  | 152  | 17.3  | 5.15  | 5.14    | 2  | cell organi  | chromosom    | catalytic ac | P00179, 7319   | ENSG000001 | UBE2A      | X         |         |         | Ubiquitin r | Synthesis c |             | 10         | 0.983       | 0.571246778 | 9.22        | 134.6   | 134     | 20.79   | 5.09  | High | 1    |   |
| FALSE | High   | Master Prq Q8BU12-1 | Kinectin (C | 0     | 78.895  | 13 | 16 | 22  | 26 | 1357 | 156.2 | 5.64  | 55.06   | 16 | cellular co  | endoplasm    | protein bin  | 3895           | ENSG000001 | SGOL20.1   | 14        |         |         | Post-transl |             | 8           | 0.983      | 0.574736311 | 15.3        | 5137.1      | 5223.7  | 28.07   | 4.48    | High  | High | High | High | High | High | High | High | 1    |      |   |
| FALSE | High   | Master Prq Q9H9L3   | Interferon  | 0.002 | 3.77    | 4  | 1  | 1   | 1  | 353  | 39.1  | 9.94  | 2.89    | 1  | metabolic    | nucleus      | catalytic ac | P00929         | 81875      | ENSG000001 | SGOL20.1  | 14      |         |             | Major pat   |             | 4          | 0.983       | 0.815745932 | 20.18       | 225.7   | 229.6   | 9.07    | 22.71 | High | 1    |   |
| FALSE | High   | Master Prq Q9UJX5   | Anaphase-   | 0     | 5.99    | 2  | 1  | 1   | 1  | 808  | 92.1  | 5.53  | 4.44    | 1  | cell divisio | cytosol;nu   | catalytic ac | P11284, 79945  | ENSG000001 | ANAPCA     | 4         |         |         | HTLV-1 inf  | APC/Cdcl    | 37          | 0.983      | 0.823103989 | 37.3        | 443.1       | 451     | 28.14   | 8.94    | High  | High | High | High | High | High | High | High | 1    |      |   |
| FALSE | High   | Master Prq P24928   | DNA-direct  | 0     | 27.798  | 3  | 3  | 4   | 3  | 1970 | 217   | 7.37  | 17.7    | 3  | metabolic    | cytoplasm;   | catalytic ac | P00076, 75439  | ENSG000001 | POLR2A     | 17        |         |         | Metabolic   | Eukaryotic  | Signaling b | 77         | 0.983       | 0.848872788 | 1.74        | 730.1   | 705.5   | 3.92    | 4.43  | High | 1    |   |
| FALSE | High   | Master Prq Q9Y2S5   | 28S riboso  | 0     | 35.102  | 52 | 5  | 6   | 5  | 130  | 14.5  | 9.85  | 23.95   | 5  | cell organi  | membrane     | RNA bindin   | P00366         | 51373      | ENSG000001 | MRPS17    | 7       |         |             | Ribosome    | Mitochond   |            | 7           | 0.983       | 0.873980675 | 8       | 1615.9  | 1655.6  | 2.43  | 5.46 | High | 1 |
| FALSE | High   | Master Prq Q06884   | DNA homc    | 0     | 45.983  | 31 | 9  | 11  | 9  | 412  | 45.7  | 6.48  | 25.48   | 9  | metabolic    | cytosol;me   | enzyme re    | P00226, 710294 | ENSG000001 | DNAJ2      | 16        |         |         | Protein prc | HSF90 cha   | 4           | 0.983      | 0.88415284  | 11.73       | 3304.8      | 3362.8  | 8.95    | 3.23    | High  | High | High | High | High | High | High | High | 1    |      |   |
| FALSE | Low    | Master Prq Q95490-1 | Adhesion c  | 0.062 | 1.108   | 1  | 1  | 1   | 1  | 1459 |       |       |         |    |              |              |              |                |            |            |           |         |         |             |             |             |            |             |             |             |         |         |         |       |      |      |      |      |      |      |      |      |      |   |

|       |        |        |     |          |              |       |         |    |    |    |    |      |       |      |        |    |              |            |              |            |           |           |            |            |              |              |             |           |             |             |             |         |         |        |       |       |      |      |      |      |      |      |      |      |   |
|-------|--------|--------|-----|----------|--------------|-------|---------|----|----|----|----|------|-------|------|--------|----|--------------|------------|--------------|------------|-----------|-----------|------------|------------|--------------|--------------|-------------|-----------|-------------|-------------|-------------|---------|---------|--------|-------|-------|------|------|------|------|------|------|------|------|---|
| FALSE | High   | Master | Prq | QBWUWJ   | Protein BR   | 0     | 4.643   | 25 | 2  | 2  | 2  | 75   | 8.7   | 5.45 | 3.14   | 2  | cell organ   | cytoplasm  | protein br   | 55845      | ENSG00000 | BRK1      | 3          | Regulation | Regulation   | Regulation   | 13          | 0.979     | 0.612726485 | 10.58       | 1525.5      | 1557.8  | 15.71   | 7.41   | High  | High  | High | High | High | High | High | High | 1    |      |   |
| FALSE | High   | Master | Prq | Q9289B1  | Polyubino    | 0     | 6.548   | 5  | 2  | 2  | 2  | 425  | 47.6  | 6.62 | 5.36   | 2  | cell organ   | cytosol;nu | catalytic ac | P103205, F | 10978     | ENSG00000 | CLP1       | 11         | mRNA sur     | mRNA Pro     | Cleavage o  | 15        | 0.979       | 0.684124027 | 24.96       | 775.1   | 792     | 12.52  | 15.91 | High  | High | High | High | High | High | High | High | 1    |   |
| FALSE | High   | Master | Prq | P13798   | Acylamino    | 0     | 34.015  | 14 | 7  | 10 | 7  | 732  | 81.2  | 5.48 | 26.85  | 7  | cell organ   | cytoplasm  | catalytic ac | P100326, F | 327       | ENSG00000 | APFH       | 6          |              |              | Eukaryotic  | 6         | 0.979       | 0.781756995 | 3.03        | 2658.2  | 2771.2  | 12.24  | 8.62  | High  | High | High | High | High | High | High | High | 1    |   |
| FALSE | High   | Master | Prq | Q00055   | Importin s   | 0     | 8.054   | 7  | 3  | 4  | 1  | 521  | 57.8  | 4.94 | 12.39  | 3  | cell organ   | cytoplasm  | protein br   | P100514, F | 3839      | ENSG00000 | KPN3       | 23         |              |              | N51 Media   | 10        | 0.979       | 0.8380377   | 4.91        | 335.2   | 328.5   | 5.75   | 4.51  | High  | High | High | High | High | High | High | High | 1    |   |
| FALSE | High   | Master | Prq | P50909   | T-complex    | 0     | 233.157 | 64 | 37 | 90 | 37 | 548  | 59.6  | 6.56 | 198.88 | 37 | cell organ   | cytoplasm  | catalytic ac | P100118    | 10694     | ENSG00000 | CTC8       | 11         |              |              | BB5ome-r    | 16        | 0.978       | 0.23233904  | 2.67        | 27388.6 | 28268.9 | 3.61   | 1.11  | High  | High | High | High | High | High | High | High | 1    |   |
| FALSE | High   | Master | Prq | Q9Y580   | RNA-bind     | 0     | 15.957  | 19 | 3  | 3  | 3  | 266  | 30.5  | 9.57 | 7.84   | 3  | regulation   | nucleus    | protein br   | P100076, F | 101979    | ENSG00000 | NBM7       | 10         |              |              |             | 0         | 0.978       | 0.384094304 | 5.14        | 477.3   | 484     | 2.18   | 4.07  | High  | High | High | High | High | High | High | High | 1    |   |
| FALSE | High   | Master | Prq | P49023   | Psallvin [O] | 0     | 23.772  | 15 | 5  | 5  | 5  | 591  | 64.5  | 6.19 | 13.73  | 5  | cell organ   | cytoplasm  | DNA bindi    | P100412, F | 5829      | ENSG00000 | PNY        | 12         | Leukocyte    | Integrin-m   | Localizati  | 33        | 0.978       | 0.396832121 | 4.69        | 1100.7  | 1237.1  | 11.66  | 8.52  | High  | High | High | High | High | High | High | High | 1    |   |
| FALSE | High   | Master | Prq | Q04760   | lactoyglut   | 0     | 25.915  | 39 | 8  | 9  | 8  | 184  | 20.8  | 5.31 | 17.97  | 8  | cell differ  | cytoplasm  | catalytic ac | P100003, F | 2739      | ENSG00000 | GLO1       | 4          | Pyruvate r   |              | Pyruvate r  | 5         | 0.978       | 0.405106166 | 5.46        | 3359.8  | 3436.2  | 11.64  | 2.89  | High  | High | High | High | High | High | High | High | 1    |   |
| FALSE | High   | Master | Prq | Q94979   | Protein tra  | 0     | 97.363  | 19 | 18 | 28 | 18 | 1220 | 132.9 | 8.89 | 79.13  | 18 | cell organ   | cytoplasm  | protein br   | P101154, F | 22872     | ENSG00000 | SEC1A      | 4          | Protein prc  | Sterol Reg   | Antigen Pr  | 18        | 0.978       | 0.619401176 | 11.63       | 8529.7  | 8314.6  | 10.15  | 5.43  | High  | High | High | High | High | High | High | High | 1    |   |
| FALSE | High   | Master | Prq | Q86VM9   | Zinc finger  | 0     | 24.89   | 9  | 7  | 10 | 7  | 953  | 106.2 | 6.82 | 15.8   | 7  | nucleus      | metal ion  | P100642      | 124245     | ENSG00000 | ZCH18     | 16         |            |              |              | 0           | 0.978     | 0.63488812  | 6.12        | 2964.1      | 3009.5  | 11.36   | 5.64   | High  | High  | High | High | High | High | High | High | 1    |      |   |
| FALSE | High   | Master | Prq | Q13630   | GDP-L-fuc    | 0     | 7.258   | 7  | 2  | 2  | 2  | 321  | 35.9  | 6.6  | 4.8    | 2  | metabolic    | cytoplasm  | catalytic ac | P101073, F | 7264      | ENSG00000 | TS1A3      | 8; CHR_    | HS           | Fructose a   |             | GDP-fucos | 9           | 0.978       | 0.687133736 | 19.07   | 1304    | 1336.2 | 25.73 | 11.23 | High | 1 |
| FALSE | High   | Master | Prq | Q9Y2A7-1 | Nck-asso     | 0     | 13.995  | 4  | 4  | 4  | 4  | 1128 | 128.7 | 6.62 | 10.56  | 4  | cell death   | cytosol;me | protein br   | P109735    | 10787     | ENSG00000 | NCKAP1     | 2          | Regulation   | Exercise-in  | Regulation  | 14        | 0.978       | 0.712691628 | 2.78        | 537     | 547.6   | 3.54   | 5.3   | High  | High | High | High | High | High | High | High | 1    |   |
| FALSE | High   | Master | Prq | Q15942   | Zyxin [OS-   | 0     | 45.563  | 29 | 11 | 15 | 11 | 572  | 61.2  | 6.67 | 24.81  | 11 | cell comm    | cytoplasm  | metal ion    | P100412    | 7791      | ENSG00000 | ZYX        | 7          | Focal adhe   |              |             | 3         | 0.978       | 0.754352627 | 22.37       | 967     | 1025.2  | 25.31  | 3.02  | High  | High | High | High | High | High | High | High | 1    |   |
| FALSE | High   | Master | Prq | Q08243-1 | Asparagine   | 0     | 9.657   | 6  | 3  | 3  | 3  | 561  | 64.3  | 6.86 | 5.77   | 3  | cell comm    | cytosol    | catalytic ac | P100310, F | 440       | ENSG00000 | ASN5       | 7          | Alanine, s   | Glutathion   | Amino acid  | 11        | 0.978       | 0.754618308 | 3.09        | 1425.4  | 1458    | 1.92   | 6.25  | High  | High | High | High | High | High | High | High | High | 1 |
| FALSE | High   | Master | Prq | Q075874  | Isoctrate c  | 0     | 65.492  | 36 | 14 | 26 | 14 | 414  | 46.6  | 7.01 | 51.49  | 14 | metabolic    | cytoplasm  | catalytic ac | P100180    | 3417      | ENSG00000 | IDH1       | 2          | Biosynthes   | Glutathion   | Neutrophil  | 21        | 0.978       | 0.793879813 | 22.94       | 5449.5  | 5629.4  | 19.43  | 7.2   | High  | High | High | High | High | High | High | High | 1    |   |
| FALSE | High   | Master | Prq | Q14181   | DNA polyb    | 0     | 18.328  | 13 | 4  | 5  | 4  | 598  | 65.9  | 5.24 | 13.12  | 4  | cell organ   | cytosol;nu | catalytic ac | P104042, F | 23649     | ENSG00000 | POLA2      | 11         | Purine mef   | G1 to S cell | Activation  | 31        | 0.977       | 0.39422968  | 5.41        | 976.7   | 1114.9  | 9.42   | 8.49  | High  | High | High | High | High | High | High | High | 1    |   |
| FALSE | High   | Master | Prq | QGNPQ8   | Synembry     | 0     | 20.496  | 11 | 3  | 3  | 3  | 531  | 59.7  | 5.33 | 11.93  | 3  | cell organ   | cytoplasm  | enzyme re    | P110165    | 60626     | ENSG00000 | RICB1      | 11         |              |              |             | 0         | 0.977       | 0.394430941 | 4.38        | 403.3   | 423.4   | 6.15   | 11.14 | High  | High | High | High | High | High | High | High | 1    |   |
| FALSE | Medium | Master | Prq | Q8BVA0   | Katanin p    | 0.028 | 1.462   | 1  | 1  | 1  | 1  | 655  | 72.3  | 7.56 | 1.85   | 1  | cell divisio | cytoplasm  | catalytic ac | P104000, F | 10300     | ENSG00000 | KATNB1     | 16         |              |              |             | 0         | 0.977       | 0.481823174 | 7.46        | 1557    | 1807.7  | 13.37  | 8.92  | High  | High | High | High | High | High | High | High | 1    |   |
| FALSE | High   | Master | Prq | Q9Y312   | Protein AA   | 0     | 8.939   | 9  | 2  | 2  | 2  | 384  | 43.4  | 5.96 | 8.35   | 2  | cell organ   | splicesome |              | P105282    | 25980     | ENSG00000 | AAR2       | 20         |              |              |             | 0         | 0.977       | 0.551420013 | 4.33        | 153.5   | 161.8   | 4.42   | 7.02  | High  | High | High | High | High | High | High | High | 1    |   |
| FALSE | High   | Master | Prq | Q8WZ82   | Esterase O   | 0     | 16.464  | 22 | 2  | 3  | 2  | 227  | 24.4  | 6.89 | 15.42  | 2  | response t   | cytoplasm  | catalytic ac | P103959    | 124641    | ENSG00000 | OVC42      | 17         |              |              |             | 0         | 0.977       | 0.578989409 | 19.4        | 412     | 427.6   | 12.7   | 13.45 | High  | High | High | High | High | High | High | High | 1    |   |
| FALSE | High   | Master | Prq | Q13395   | Probable n   | 0.003 | 2.886   | 1  | 1  | 1  | 1  | 1621 | 181.6 | 7.05 | 1.69   | 1  | metabolic    | nucleus    | catalytic ac | P100588    | 6894      | ENSG00000 | TARBP1     | 1          |              |              |             | 0         | 0.977       | 0.655287249 | 45.91       | 317.9   | 350.5   | 46.7   | 7.79  | High  | High | High | High | High | High | High | High | 1    |   |
| FALSE | High   | Master | Prq | Q14141-1 | Septin-6 [C  | 0     | 14.768  | 7  | 3  | 3  | 3  | 434  | 49.7  | 6.67 | 7.32   | 3  | cell differ  | chromoso   | nucleotide   | P100735    | 23157     | ENSG00000 | SEPT6      | 1          | Bacterial ir |              |             | 1         | 0.977       | 0.700047861 | 11.53       | 1016.4  | 1014.4  | 9.11   | 11.78 | High  | High | High | High | High | High | High | High | 1    |   |
| FALSE | High   | Master | Prq | Q8NSM9   | Protein jag  | 0     | 9.09    | 7  | 1  | 3  | 1  | 183  | 21.1  | 9.73 | 12.35  | 1  | cell differ  | endoplasm  | protein br   | P107086    | 84522     | ENSG00000 | JAGN1      | 1          |              |              |             | 0         | 0.977       | 0.781054383 | 1.67        | 1655.2  | 1580.1  | 4.1    | 6.8   | High  | High | High | High | High | High | High | High | 1    |   |
| FALSE | High   | Master | Prq | P33240   | cleavage s   | 0     | 28.768  | 24 | 8  | 10 | 4  | 577  | 60.9  | 6.83 | 18.29  | 8  | metabolic    | nucleus    | protein br   | P100076, F | 1478      | ENSG00000 | CSF72      | 1          | mRNA sur     | mRNA Pro     | Cleavage o  | 15        | 0.977       | 0.888686705 | 10.43       | 177.8   | 181.9   | 7.54   | 1.37  | High  | High | High | High | High | High | High | High | High | 1 |
| FALSE | High   | Master | Prq | Q8BVM0   | Coiled-co    | 0.001 | 4.207   | 4  | 1  | 1  | 1  | 306  | 35.8  | 6.65 | 30.8   | 1  | cytoplasm    |            |              | P115295    | 152137    | ENSG00000 | CDC50C     | 3          |              |              |             | 0         | 0.977       | 0.921662134 | 3.39        | 320.7   | 316.3   | 6.59   | 5.53  | High  | High | High | High | High | High | High | High | 1    |   |
| FALSE | High   | Master | Prq | Q06953   | Zinc finger  | 0     | 23.911  | 12 | 5  | 7  | 5  | 477  | 54.2  | 6.15 | 15.57  | 5  | regulation   | cytoplasm  | metal ion    | P112171, F | 90441     | ENSG00000 | ZNF622     | 5          |              |              |             | 0         | 0.976       | 0.391952319 | 5.03        | 799.5   | 921.4   | 10.39  | 9.85  | High  | High | High | High | High | High | High | High | 1    |   |
| FALSE | High   | Master | Prq | Q15785   | Mitochondr   | 0     | 5.032   | 5  | 2  | 3  | 1  | 309  | 34.5  | 8.98 | 7.1    | 2  | transport    | cytoplasm  | protein br   | P100515, F | 10953     | ENSG00000 | TOMM34     | 20         |              |              |             | 0         | 0.976       | 0.391991859 | 4.41        | 180.6   | 190.1   | 2.05   | 15.23 | High  | High | High | High | High | High | High | High | 1    |   |
| FALSE | High   | Master | Prq | Q15021   | condensin    | 0     | 17.352  | 5  | 5  | 6  | 5  | 1401 | 157.1 | 6.61 | 17.92  | 5  | cell divisio | chromoso   | protein br   | P112717, F | 9918      | ENSG00000 | NCAPD2     | 12         |              |              | Condensat   | 0         | 0.976       | 0.395468814 | 5.1         | 920.7   | 968.5   | 9.69   | 5.34  | High  | High | High | High | High | High | High | High | High | 1 |
| FALSE | High   | Master | Prq | Q53LP3   | ankyrin re   | 0     | 15.247  | 10 | 4  | 5  | 4  | 525  | 55.6  | 7.03 | 12.36  | 4  | cell organ   | cytoplasm  | protein br   | P100023, F | 65124     | ENSG00000 | SOAHWC     | 4          |              |              |             | 0         | 0.976       | 0.463212514 | 7.85        | 1193    | 1270.1  | 20.41  | 9.39  | High  | High | High | High | High | High | High | High | 1    |   |
| FALSE | High   | Master | Prq | Q8NER6   | Calcium ur   | 0     | 22.598  | 19 | 4  | 6  | 5  | 351  | 39.8  | 8.65 | 17.19  | 5  | cell organ   | membrane   | catalytic ac | P104678    | 90550     | ENSG00000 | MCU        | 10         | NOD-like r   |              | Processing  | 5         | 0.976       | 0.695530846 | 2.08        | 1209    | 1231    | 6.1    | 3.17  | High  | High | High | High | High | High | High | High | High | 1 |
| FALSE | High   | Master | Prq | P61224-1 | Ras-relate   | 0     | 71.43   | 61 | 10 | 26 | 3  | 184  | 20.8  | 5.78 | 67.64  | 10 | cell organ   | cytoplasm  | catalytic ac | P100009, F | 5908      | ENSG00000 | RAP1B      | 12         | Pancreatic   | Integrin-m   | Gene and r  | 55        | 0.976       | 0.721079045 | 0.26        | 1007.4  | 1023.2  | 3.74   | 3.62  | High  | High | High | High | High | High | High | High | High | 1 |
| FALSE | High   | Master | Prq | P13693   | Translation  | 0     | 64.125  | 38 | 8  | 24 | 8  | 172  | 19.6  | 4.93 | 60.75  | 8  | cell differ  | cytoplasm  | metal ion    | P100838    | 7178      | ENSG00000 | TPST1      | 13         |              |              |             | 0         | 0.976       | 0.740458653 | 25.42       | 7951.8  | 8146.3  | 15.26  | 9.03  | High  | High | High | High | High | High | High | High | 1    |   |
| FALSE | High   | Master | Prq | P0DMM9   | Sulfotransf  | 0     | 24.346  | 27 | 5  | 7  | 5  | 295  | 34.2  | 6.01 | 24.13  | 5  | metabolic    | cytoplasm  | catalytic ac | P100685, F | 445329; 6 | ENSG00000 | SULT1A4; 1 | 16         | Chemical c   | Sulfation B  | Cytosolic s | 11        | 0.975       | 0.838549463 | 4.94        | 1685.3  | 1813.8  | 9.13   | 6.41  | High  | High | High | High | High | High | High | High | High | 1 |
| FALSE | High   | Master | Prq | Q8DHX1   | ATP-depen    | 0     | 23.879  | 7  | 6  | 6  | 6  | 1008 | 114.7 | 6.68 | 11.75  | 6  | metabolic    | chromoso   | catalytic ac | P100270, F | 137056    | ENSG00000 | CHX36      | 3          | RNA degra    |              | TRAPE mef   | 12        | 0.975       | 0.419326042 | 6.6         | 699.7   | 685.7   | 10.09  | 4.85  | High  | High | High | High | High | High | High | High | High | 1 |
| FALSE | High   | Master | Prq | P09104   | Gamma-er     | 0     | 93.432  | 31 | 9  | 71 | 5  | 434  | 47.2  | 5.03 | 176.98 | 9  | metabolic    | cytoplasm  | catalytic ac | P100113, F | 2026      | ENSG00000 | ENO2       | 12         | Biosynthes   | Glycolysis   |             | 12        | 0.975       | 0.552842748 | 13.9        |         |         |        |       |       |      |      |      |      |      |      |      |      |   |

|       |      |                     |              |       |         |    |    |     |    |      |       |       |        |    |                                     |                  |                     |    |             |             |              |  |    |       |             |             |         |         |         |       |       |      |      |      |      |      |      |      |   |
|-------|------|---------------------|--------------|-------|---------|----|----|-----|----|------|-------|-------|--------|----|-------------------------------------|------------------|---------------------|----|-------------|-------------|--------------|--|----|-------|-------------|-------------|---------|---------|---------|-------|-------|------|------|------|------|------|------|------|---|
| FALSE | High | Master Prq C9GZP8-1 | Immortal     | 0     | 23.381  | 43 | 4  | 10  | 4  | 106  | 10.9  | 9.73  | 22.28  | 4  | cytosol;mel DNA bindi               | 64073            | ENSG000001C19orf133 | 19 |             |             |              |  |    | 0     | 0.972       | 0.800350625 | 28.94   | 5737.5  | 5893.4  | 5.07  | 17.77 | High | 1 |
| FALSE | High | Master Prq Q01780   | exosome c    | 0     | 20.434  | 7  | 6  | 7   | 6  | 885  | 100.8 | 8.46  | 11.55  | 6  | metabolic; cytoplasm; catalytic ac  | P100570, F 5394  | ENSG000001EXOSC10   | 4  | RNA degra   | Major patt  |              |  |    | 0     | 0.972       | 0.862317712 | 13.04   | 869.1   | 893.9   | 12.38 | 4.35  | High | 1 |
| FALSE | High | Master Prq Q14152   | Eukaryotic   | 0     | 152.800 | 30 | 41 | 76  | 41 | 1382 | 166.5 | 6.79  | 142.81 | 41 | cell organ; cytoplasm; protein bi   | P101399          | ENSG000001EF3A      | 10 | RNA trans   | Translator  | Formation    |  |    | 13    | 0.972       | 0.930969455 | 2.15    | 18085.7 | 18258.6 | 4.56  | 2.86  | High | 1 |
| FALSE | High | Master Prq Q9BU15   | Tubulin be   | 0     | 117.222 | 53 | 18 | 67  | 7  | 446  | 49.8  | 8.88  | 156.3  | 18 | cell organ; cytoplasm; catalytic ac | P100091, F 84617 | ENSG000001TUBB8     | 18 | Gap junc    | Pathogeni   | COP1-inde    |  |    | 65    | 0.971       | 0.055112635 | 1.02    | 2929.6  | 3010.8  | 5.21  | 3.66  | High | 1 |
| FALSE | High | Master Prq P49590   | probable h   | 0     | 35.164  | 22 | 7  | 8   | 4  | 506  | 56.9  | 8.24  | 19.23  | 7  | cell organ; cytoplasm; catalytic ac | P100587, F 23438 | ENSG000001HARS2     | 5  | Aminoacyl   | Mitochond   |              |  | 5  | 0.971 | 0.266619819 | 2.73        | 1310.4  | 1324.8  | 3.21    | 8.77  | High  | High | High | High | High | High | High | 1    |   |
| FALSE | High | Master Prq P11413-1 | Glucose-6    | 0     | 154.021 | 58 | 25 | 70  | 25 | 515  | 59.2  | 6.84  | 177.87 | 25 | metabolic; cytoplasm; catalytic ac  | P100479, F 2539  | ENSG000001G6P0      | 19 | Carbon me   | Glutathion  | TP53 Regu    |  |    | 19    | 0.971       | 0.284257726 | 3.23    | 24502.4 | 26517.4 | 7.06  | 4.88  | High | 1 |
| FALSE | High | Master Prq Q43765   | Small glut   | 0     | 23.637  | 21 | 6  | 8   | 6  | 313  | 34    | 4.87  | 14.75  | 6  | metabolic; cytoplasm; protein bi    | P100515, F 6449  | ENSG000001SGTA      | 19 |             |             |              |  |    | 0     | 0.971       | 0.388728043 | 6.18    | 359.2   | 369.9   | 11.54 | 2.24  | High | 1 |
| FALSE | High | Master Prq Q96R58   | pre-mRNA     | 0     | 10.209  | 20 | 2  | 4   | 2  | 191  | 20.9  | 4.39  | 3.15   | 2  | metabolic; nucleus                  | P110773          | ENSG000001T9R2      | X  |             |             |              |  |    | 0     | 0.971       | 0.470635019 | 12.46   | 809.9   | 833.9   | 29.34 | 0.81  | High | 1 |
| FALSE | High | Master Prq Q9NWS8   | Cell growt   | 0     | 9.914   | 7  | 3  | 5   | 3  | 379  | 43.6  | 9.54  | 10.67  | 3  | nucleus                             | P108790          | ENSG000001LVAR      | 4  |             |             |              |  |    | 0     | 0.971       | 0.504406457 | 4.14    | 2248.9  | 2268.5  | 26.27 | 8.35  | High | 1 |
| FALSE | High | Master Prq Q17L23-1 | Putative A   | 0     | 40.864  | 9  | 9  | 12  | 9  | 1194 | 133.9 | 8.78  | 26.19  | 9  | cell organ; cytoplasm; catalytic ac | P100270, F 22907 | ENSG000001DHX30     | 4  |             |             |              |  |    | 0     | 0.971       | 0.516390089 | 9.2     | 1693    | 1742.8  | 2.11  | 4.11  | High | 1 |
| FALSE | High | Master Prq Q9Y314   | nitric oxid  | 0     | 16.075  | 13 | 3  | 4   | 4  | 301  | 33.2  | 8.82  | 13.07  | 3  | developm; cytoplasm; catalytic ac   | P104564, F 51070 | ENSG000001NOSIP     | 19 |             |             | NOSIP mec    |  |    | 4     | 0.971       | 0.522910593 | 10.4    | 1267.6  | 1317.8  | 9.18  | 0.52  | High | 1 |
| FALSE | High | Master Prq Q9Y6G9   | Cytoplasm    | 0     | 11.597  | 10 | 3  | 6   | 3  | 523  | 56.5  | 6.42  | 10.69  | 3  | cell divisi; chromosor              | P100005, F 51143 | ENSG000001DYNCL11   | 13 | Salmonella  | COP1-inde   | snRNP Ass    |  |    | 38    | 0.971       | 0.56451306  | 28.58   | 490.8   | 580.1   | 20.2  | 24.42 | High | 1 |
| FALSE | High | Master Prq P54105   | Methyloso    | 0     | 29.434  | 27 | 5  | 11  | 5  | 237  | 26.2  | 4.11  | 29.18  | 5  | cell organ; cytoplasm; protein bi   | P103517          | ENSG000001GLNS1A    | 11 | RNA trans   |             |              |  |    | 4     | 0.971       | 0.566359997 | 5.17    | 3188.5  | 3283.1  | 20.31 | 2.86  | High | 1 |
| FALSE | High | Master Prq Q9H0U3   | Magnesiur    | 0     | 4.556   | 5  | 2  | 2   | 2  | 335  | 38    | 9.63  | 2.31   | 2  | metabolic; endoplasm                | P104756          | ENSG000001MAGT1     | X  | Asparagin   |             |              |  |    | 8     | 0.971       | 0.59729033  | 11.51   | 152.9   | 159.1   | 3.58  | 5.44  | High | 1 |
| FALSE | High | Master Prq Q96D46   | 60S riboso   | 0     | 23.182  | 14 | 5  | 6   | 5  | 503  | 57.6  | 7.14  | 16.05  | 5  | regulation; cytoplasm; protein bi   | P104981          | ENSG000001NMD03     | 3  | Ribosome    |             |              |  |    | 2     | 0.971       | 0.607725372 | 6.48    | 2295.4  | 2289.8  | 13.71 | 9.41  | High | 1 |
| FALSE | High | Master Prq Q4692-1  | DNA mism     | 0     | 6.584   | 3  | 2  | 2   | 2  | 756  | 84.5  | 5.72  | 3.48   | 2  | cell organ; chromosor               | P101119, F 4292  | ENSG000001MLH1      | 3  | Fancani an  | Ovarian Int | Mismatch     |  |    | 25    | 0.971       | 0.610417761 | 28.32   | 393.6   | 405.5   | 20.38 | 16.33 | High | 1 |
| FALSE | High | Master Prq P61758   | Prefoldin s  | 0     | 31.921  | 42 | 9  | 20  | 9  | 197  | 22.6  | 7.11  | 37.38  | 9  | cell organ; cytoplasm; protein bi   | P102996          | ENSG000001VBP1      | X  | Prefoldin r |             |              |  |    | 5     | 0.971       | 0.611376408 | 25.78   | 4152    | 4277.7  | 35.3  | 11.03 | High | 1 |
| FALSE | High | Master Prq P25205   | DNA replic   | 0     | 113.502 | 34 | 24 | 45  | 24 | 808  | 90.9  | 5.77  | 90.93  | 24 | metabolic; cytoplasm; catalytic ac  | P100493, F 4172  | ENSG000001MCM3      | 6  | DNA replic  | Cell Cycle; | M/G1 Tran    |  |    | 26    | 0.971       | 0.987371894 | 1.25    | 8865.5  | 9047.1  | 2.36  | 3.73  | High | 1 |
| FALSE | High | Master Prq P12081   | Histidine--  | 0     | 53.214  | 25 | 11 | 14  | 8  | 509  | 57.4  | 5.88  | 32.27  | 11 | cell organ; cytoplasm; catalytic ac | P100458, F 3035  | ENSG000001HARS      | 5  | Aminoacyl;  | Allograft R | Cytosolic tr |  |    | 6     | 0.97        | 0.058834274 | 1.23    | 2988.2  | 3071.1  | 9.12  | 10.19 | High | 1 |
| FALSE | High | Master Prq P33993-1 | DNA replic   | 0     | 102.009 | 29 | 16 | 34  | 16 | 719  | 81.3  | 6.46  | 89.13  | 16 | cell profile; chromosor             | P100493, F 4176  | ENSG000001MCM7      | 7  | Cell cycle; | miRNA Reg   | M/G1 Tran    |  |    | 27    | 0.97        | 0.158995042 | 1.62    | 6695    | 6870.3  | 4.45  | 1.72  | High | 1 |
| FALSE | High | Master Prq P53992   | Protein tra  | 0     | 76.348  | 19 | 15 | 28  | 15 | 1094 | 118.2 | 7.06  | 78.72  | 15 | cell organ; cytoplasm; metal ion    | P100626, F 9632  | ENSG000001SEC24C    | 10 | Protein prc | Sterol Reg  | Regulation   |  |    | 20    | 0.97        | 0.231750481 | 4.04    | 4287.1  | 4343.8  | 4.9   | 2.56  | High | 1 |
| FALSE | High | Master Prq Q9UK56   | Protein kin  | 0     | 46.928  | 29 | 10 | 18  | 10 | 424  | 48.5  | 6.18  | 46.98  | 10 | cell organ; cytoplasm; enzyme re    | P100818, F 29763 | ENSG000001PAC3N3    | 11 |             |             | Clathrin-in  |  |    | 3     | 0.97        | 0.234003574 | 2.57    | 4405.8  | 4587.1  | 4.1   | 1.57  | High | 1 |
| FALSE | High | Master Prq Q9UNF1   | Melanoma     | 0     | 128.714 | 44 | 28 | 53  | 28 | 606  | 64.9  | 9.32  | 120.97 | 28 | transpor; cytosol;ext               | P101454          | ENSG000001MAGED2    | X  |             |             |              |  |    | 4     | 0.97        | 0.342439647 | 5.13    | 10205.9 | 11036.7 | 7.15  | 3.48  | High | 1 |
| FALSE | High | Master Prq Q95379   | Tumor nec    | 0     | 7.484   | 10 | 1  | 1   | 1  | 198  | 23    | 7.93  | 4.93   | 1  | cell organ; cytoplasm; enzyme re    | P105527          | ENSG000001TNAIP8    | 5  |             |             |              |  |    | 4     | 0.97        | 0.584544135 | 46.4    | 58.8    | 60.6    | 27.89 | 41.62 | High | 1 |
| FALSE | High | Master Prq Q94925-3 | Isoform 3    | 0     | 78.648  | 34 | 13 | 22  | 13 | 598  | 65.4  | 7.88  | 64.22  | 13 | cell comm; cytosol;ml               | P104960          | ENSG000001GLS       | 2  |             |             |              |  |    | 1     | 0.97        | 0.608832622 | 15.05   | 3447.1  | 3553.8  | 8.41  | 5     | High | 1 |
| FALSE | High | Master Prq Q96AX1   | Vacuolar p   | 0.003 | 3.438   | 3  | 2  | 3   | 2  | 596  | 67.6  | 6.66  | 9.97   | 2  | cell differe; endosome              | P100995          | ENSG000001VPS34     | 12 |             |             |              |  |    | 1     | 0.97        | 0.648076833 | 18.13   | 534.5   | 551.1   | 9.96  | 6.46  | High | 1 |
| FALSE | High | Master Prq Q9UIA9   | exonin-7     | 0     | 18.217  | 6  | 5  | 6   | 5  | 1087 | 123.8 | 6.32  | 12.53  | 5  | transpor; cytoplasm; protein bi     | P103810          | ENSG000001KP07      | 8  |             |             |              |  |    | 0     | 0.97        | 0.678633817 | 17.45   | 827.3   | 883.8   | 10.79 | 6.42  | High | 1 |
| FALSE | High | Master Prq P78346-1 | ribonuclea   | 0     | 8.117   | 15 | 3  | 4   | 3  | 268  | 29.3  | 8.91  | 4.94   | 3  | metabolic; nucleus                  | P101876          | ENSG000001RPP30     | 10 | RNA trans   | Major patt  |              |  | 8  | 0.97  | 0.770136287 | 10.54       | 998.4   | 1029.4  | 13.05   | 3.71  | High  | High | High | High | High | High | High | 1    |   |
| FALSE | High | Master Prq Q9P258   | Protein RC   | 0     | 44.219  | 26 | 12 | 17  | 12 | 522  | 56    | 8.78  | 33.38  | 12 | cell divisi; chromosor              | P100415, F 55920 | ENSG000001RCC2      | 1  | CHR_HG      | Amplificat  |              |  | 16 | 0.97  | 0.775862596 | 6.22        | 2386.5  | 2459.6  | 4.9     | 1.99  | High  | High | High | High | High | High | High | 1    |   |
| FALSE | High | Master Prq Q96G03   | Phosphogl    | 0     | 21.807  | 14 | 8  | 9   | 8  | 612  | 68.2  | 6.73  | 15.77  | 8  | metabolic; cytoplasm; catalytic ac  | P100408, F 55276 | ENSG000001PGM2      | 18 | Glycolys    | Glucuronid  | Neutrophil   |  |    | 18    | 0.97        | 0.939044113 | 1.63    | 1125    | 1107.2  | 5.11  | 9.45  | High | 1 |
| FALSE | High | Master Prq P68371   | Tubulin be   | 0     | 328.506 | 72 | 26 | 212 | 2  | 445  | 49.8  | 8.89  | 556.52 | 26 | cell organ; cytoplasm; catalytic ac | P100091, F 10383 | ENSG000001TUBB4B    | 49 | Phagosome   | Pathogeni   | COP1-inde    |  |    | 74    | 0.969       | 0.181506921 | 2.61    | 3563    | 3613.7  | 5.11  | 7.71  | High | 1 |
| FALSE | High | Master Prq P07741-1 | Adenine pl   | 0     | 58.039  | 79 | 9  | 17  | 9  | 180  | 19.6  | 6.02  | 61.17  | 9  | metabolic; cytoplasm; catalytic ac  | P100156          | ENSG000001APRT      | 16 | Metabolic   | Neutrophil  |              |  | 9  | 0.969 | 0.313095961 | 2.38        | 3691.3  | 3809.2  | 5.37    | 6.47  | High  | High | High | High | High | High | High | 1    |   |
| FALSE | High | Master Prq Q13263   | Transcript   | 0     | 137.384 | 42 | 23 | 50  | 23 | 835  | 88.5  | 5.77  | 91.04  | 23 | cell organ; chromosor               | P100628, F 10155 | ENSG000001TRIM28    | 14 | Corticost   | Genetic Tr  |              |  | 6  | 0.969 | 0.360309381 | 6.82        | 14567.8 | 15348.3 | 2.55    | 7.47  | High  | High | High | High | High | High | High | 1    |   |
| FALSE | High | Master Prq Q96R81   | THO comp     | 0     | 54.608  | 41 | 8  | 15  | 8  | 257  | 26.9  | 11.15 | 32.67  | 8  | cell organ; cytoplasm; protein bi   | P100767, F 10189 | ENSG000001ALRF17    | 17 | Herpes sim  | mRNA 3'-e   |              |  | 19 | 0.969 | 0.403512614 | 7.46        | 5227.2  | 5519    | 10.75   | 8.12  | High  | High | High | High | High | High | High | 1    |   |
| FALSE | High | Master Prq Q14554   | Protein dis  | 0     | 7.28    | 9  | 3  | 3   | 3  | 519  | 59.6  | 7.91  | 7.07   | 3  | cellular ho; endoplasm              | P100545, F 10954 | ENSG000001PDAS      | 5  |             |             | XBPA153 ac   |  |    | 4     | 0.969       | 0.498193556 | 12.6    | 719     | 742     | 7.7   | 8.77  | High | 1 |
| FALSE | High | Master Prq P20073-1 | Anexin A7    | 0     | 63.481  | 29 | 13 | 32  | 13 | 488  | 52.7  | 5.68  | 63.67  | 13 | cell differe; cytosol;mel           | P100191          | ENSG000001ANXA7     | 10 |             |             |              |  |    | 0     | 0.969       | 0.585106022 | 2.78    | 10753.6 | 11094.8 | 1.15  | 5.5   | High | 1 |
| FALSE | High | Master Prq Q9N2T8   | Insulin-like | 0     | 52.715  | 25 | 13 | 18  | 10 | 577  | 63.4  | 9.2   | 27.37  | 13 | cell profile; cytoplasm; protein bi | P100133, F 10642 | ENSG000001GF28P1    | 17 | MicroRNA    | Brain-Deri  | MAPK6/M      |  |    | 8     | 0.969       | 0.588878454 | 21.42   | 3150.6  | 3202.1  | 24.46 | 5.43  | High | 1 |
| FALSE | High | Master Prq Q9BU138  | Nucleolar    | 0     | 9.663   | 5  | 2  | 2   | 2  | 636  | 69.4  | 7.28  | 4.88   | 2  |                                     | 161424           | ENSG000001NCP9      | 14 |             |             |              |  |    |       |             |             |         |         |         |       |       |      |      |      |      |      |      |      |   |

|       |      |                      |              |       |         |    |    |     |    |      |       |       |        |    |                                    |                        |                 |                    |                |            |              |              |             |             |             |              |             |             |             |         |         |         |       |      |      |      |      |      |      |      |   |
|-------|------|----------------------|--------------|-------|---------|----|----|-----|----|------|-------|-------|--------|----|------------------------------------|------------------------|-----------------|--------------------|----------------|------------|--------------|--------------|-------------|-------------|-------------|--------------|-------------|-------------|-------------|---------|---------|---------|-------|------|------|------|------|------|------|------|---|
| FALSE | High | Master Prq P09382    | Galactin-1   | 0     | 65.417  | 81 | 10 | 33  | 10 | 135  | 14.7  | 5.5   | 80.63  | 10 | cell death; cell surface protein   | P00337                 | 3956            | ENSG000001         | LGALS1         | 22         |              |              |             | Post-transl | 4           | 0.965        | 0.526015018 | 16.64       | 10202.4     | 10708   | 15.21   | 7.89    | High  | High | High | High | High | High | 1    |      |   |
| FALSE | High | Master Prq Q16531    | DNA dama     | 0     | 151.814 | 37 | 34 | 48  | 34 | 1140 | 126.9 | 5.26  | 117.48 | 34 | cell organ; cytoplasm; DNA bindi   | P031278, F1642         | 1642            | ENSG000001         | DDI1           | 11         | Viral cardir |              | Formation   | 19          | 0.965       | 0.563500061  | 9.64        | 12649.1     | 13963.4     | 9.86    | 4.83    | High    | High  | High | High | High | High | 1    |      |      |   |
| FALSE | High | Master Prq P0C378    | POTE anky    | 0     | 44.16   | 7  | 7  | 58  | 1  | 1075 | 121.2 | 6.21  | 134.11 | 7  | protein bir                        | P000022, F653269       | 653269          | ENSG000001         | POTE1          | 2          |              |              |             |             | 0           | 0.965        | 0.598682675 | 47.34       | 290.9       | 318.7   | 42.53   | 31.47   | High  | High | High | High | High | High | 1    |      |   |
| FALSE | High | Master Prq Q08T08    | RNA bindi    | 0     | 15.459  | 13 | 3  | 3   | 3  | 480  | 50.4  | 9.63  | 11.24  | 3  | regulation                         | protein bir            | P000076, F79171 | 79171              | ENSG000001     | RRM42      | 19           |              |             |             | 0           | 0.965        | 0.681770147 | 26.78       | 563.8       | 568.4   | 19.61   | 9.55    | High  | High | High | High | High | High | 1    |      |   |
| FALSE | High | Master Prq Q5T19H    | RRP12-like   | 0     | 42.254  | 9  | 8  | 11  | 8  | 1297 | 143.6 | 8.75  | 34.55  | 8  | membrane                           | RNA bindi              | P000061, 23223  | 23223              | ENSG000001     | RRP12      | 10           |              |             |             | 0           | 0.965        | 0.716595151 | 13.17       | 3667.3      | 3849.1  | 9.78    | 0.97    | High  | High | High | High | High | High | 1    |      |   |
| FALSE | High | Master Prq Q75116    | Rho-asso     | 0     | 16.523  | 6  | 7  | 8   | 7  | 1388 | 160.8 | 6.02  | 4.36   | 7  | cell organ; cytoplasm; catalytic   | ai                     | P00069, F9475   | 9475               | ENSG000001     | ROCK2      | 2            | Regulation   | Androgen    | EPHA-med    | 47          | 0.965        | 0.736551701 | 23.01       | 638.2       | 661.2   | 22.38   | 9.87    | High  | High | High | High | High | High | 1    |      |   |
| FALSE | High | Master Prq Q0891-1   | Serine-1R    | 0     | 43.001  | 29 | 10 | 10  | 10 | 518  | 58.2  | 8.13  | 27.38  | 10 | cell organ; cytoplasm; catalytic   | ai                     | P000593, F54938 | 54938              | ENSG000001     | SARS2      | 19           | CHR_H        | Aminoacyl   | Selenium    | 6           | 0.965        | 0.775943917 | 6.52        | 1360.8      | 1376.8  | 1.79    | 7.01    | High  | High | High | High | High | High | 1    |      |   |
| FALSE | High | Master Prq Q09H53    | epidermal    | 0     | 47.625  | 21 | 10 | 13  | 10 | 715  | 80.6  | 6.84  | 31.77  | 10 | regulation                         | cytoplasm; protein bir | P000018, F64787 | 64787              | ENSG000001     | PSR12      | 11           |              |             |             | 0           | 0.965        | 0.801377004 | 34.17       | 1290.7      | 1337.8  | 24.99   | 12.04   | High  | High | High | High | High | High | 1    |      |   |
| FALSE | High | Master Prq Q38B0V    | Neuroblast   | 0.009 | 2.118   | 1  | 1  | 1   | 1  | 1214 | 139.3 | 4.78  | 1.79   | 1  | metabolic                          | cytoplasm; catalytic   | ai              | P006758, 55672     | 55672          | ENSG000001 | NBP1         | 1            |             |             | 0           | 0.965        | 0.830020117 | 20.8        | 488         | 532.1   | 21.6    | 7.82    | High  | High | High | High | High | High | 1    |      |   |
| FALSE | High | Master Prq Q08910-1  | Jupiter mtc  | 0     | 42.599  | 57 | 7  | 13  | 7  | 190  | 20.1  | 9.26  | 23.81  | 7  | cytoplasm;                         |                        | 90861           | ENSG000001         | HN1L1, JPT     | 16         |              |              |             | 0           | 0.965       | 0.968317588  | 0.89        | 2196.1      | 2166.1      | 4.49    | 4.24    | High    | High  | High | High | High | High | 1    |      |      |   |
| FALSE | High | Master Prq Q043592   | Exportin-T   | 0     | 17.629  | 7  | 5  | 6   | 5  | 962  | 109.9 | 5.39  | 9.59   | 5  | transport                          | cytoplasm; protein bir | P008389         | 11260              | ENSG000001     | XPOT       | 12           | RNA trans    |             | tRNA proc   | 4           | 0.964        | 0.147901697 | 1.38        | 241.8       | 251     | 6.99    | 3.13    | High  | High | High | High | High | High | 1    |      |   |
| FALSE | High | Master Prq Q75608    | Acyl-prote   | 0.002 | 3.798   | 7  | 2  | 3   | 2  | 230  | 24.7  | 6.77  | 5.36   | 2  | metabolic                          | cytoplasm; catalytic   | ai              | P00561, F10434     | 10434          | ENSG000001 | LYPLA1       | 8            | Choline me  |             | eNOS activ  | 6            | 0.964       | 0.243838649 | 1.92        | 685.6   | 716.4   | 10.66   | 4.28  | High | High | High | High | High | High | 1    |   |
| FALSE | High | Master Prq Q04347    | peptidyl-pi  | 0     | 33.894  | 52 | 8  | 17  | 6  | 177  | 19.2  | 8.07  | 28.47  | 8  | cell organ;                        | cytoplasm; catalytic   | ai              | P00160             | 10465          | ENSG000001 | PPH1         | 1            | Spliceosom  |             | mRNA Spli   | 5            | 0.964       | 0.245567498 | 2.84        | 1206.4  | 1260.5  | 1.68    | 6.05  | High | High | High | High | High | High | 1    |   |
| FALSE | High | Master Prq Q08D13    | Probable a   | 0.005 | 2.564   | 3  | 1  | 1   | 1  | 523  | 55.8  | 6.87  | 0      | 1  | metabolic                          | cytoplasm; catalytic   | ai              | P00883             | 79716          | ENSG000001 | NPEPL1       | 20           |             |             | 0           | 0.964        | 0.281542246 | 6.03        | 381         | 379.8   | 2.31    | 5.45    | High  | High | High | High | High | High | 1    |      |   |
| FALSE | High | Master Prq Q08D01    | Metal tran   | 0     | 12.284  | 6  | 3  | 3   | 3  | 707  | 76.1  | 6.09  | 8      | 3  | transport                          | membrane               | protein bir     | P00571             | 26505          | ENSG000001 | CNNM3        | 2            |             |             | 0           | 0.964        | 0.282956892 | 6.32        | 601.3       | 627.6   | 3.43    | 3.63    | High  | High | High | High | High | High | 1    |      |   |
| FALSE | High | Master Prq P14678-1  | Small nuck   | 0     | 67.589  | 23 | 6  | 30  | 6  | 240  | 24.6  | 11.19 | 91.37  | 6  | cell organ;                        | cytoplasm; protein bir | P01423          | 6628               | ENSG000001     | SNRNP      | 20           | Spliceosom   | mRNA Pro    | SLBP indeg  | 17          | 0.964        | 0.405740226 | 9.52        | 7968.2      | 8942.2  | 4.79    | 12.38   | High  | High | High | High | High | High | 1    |      |   |
| FALSE | High | Master Prq Q09848    | Probable r   | 0     | 55.965  | 37 | 10 | 20  | 10 | 306  | 34.8  | 10.1  | 50.51  | 10 | metabolic                          | nucleus                | protein bir     | P005890            | 10969          | ENSG000001 | EBNA1BP2     | 1            |             |             | Major part  | 4            | 0.964       | 0.406333388 | 10.29       | 7480.8  | 7577.4  | 8.55    | 3.35  | High | High | High | High | High | High | 1    |   |
| FALSE | High | Master Prq Q00306    | Intron-bin   | 0     | 51.079  | 11 | 11 | 13  | 11 | 1485 | 171.2 | 6.37  | 33.07  | 11 | metabolic                          | membrane               | catalytic       | ai                 | P04851, F9716  | 9716       | ENSG000001   | ALP          | 15          | Spliceosom  | Dual incisi | 11           | 0.964       | 0.456294452 | 3.97        | 4031.1  | 4173.6  | 3.72    | 0.99  | High | High | High | High | High | High | 1    |   |
| FALSE | High | Master Prq P30044-1  | Peroxi-red   | 0     | 122.876 | 69 | 14 | 50  | 14 | 214  | 22.1  | 8.7   | 139.06 | 14 | cell death; cytoplasm; antioxidant | P00578, F25824         | 25824           | ENSG000001         | PRDX5          | 11         | Peroxisom    | Selenium     | Deferoxal   | 5           | 0.964       | 0.468212217  | 12.28       | 10294.9     | 10677.5     | 11.69   | 4.8     | High    | High  | High | High | High | High | 1    |      |      |   |
| FALSE | High | Master Prq Q043598-1 | 2'-deoxyr    | 0     | 14.339  | 44 | 4  | 5   | 4  | 174  | 19.1  | 5.05  | 6.37   | 4  | cell differe                       | cytoplasm; catalytic   | ai              | P05014             | 10591          | ENSG000001 | GcGr108      | 6            |             |             | Purine cat  | 5            | 0.964       | 0.515478246 | 20.35       | 77.9    | 100.2   | 14.69   | 24.82 | High | High | High | High | High | High | 1    |   |
| FALSE | High | Master Prq P26232    | Catenin aii  | 0     | 16.103  | 6  | 5  | 8   | 2  | 953  | 105.2 | 5.71  | 15.63  | 5  | cell differe                       | cytoplasm; protein bir | P01044          | 1496               | ENSG000001     | CNNM2      | 2            | Bacterial ir | Arrhythm    | CCO in my   | 13          | 0.964        | 0.524602008 | 124.83      | 678         | 703.2   | 115.29  | 27.81   | High  | High | High | High | High | High | 1    |      |   |
| FALSE | High | Master Prq Q08Z19    | Methionin    | 0     | 74.058  | 40 | 12 | 21  | 12 | 334  | 37.5  | 7.36  | 68.26  | 12 | metabolic                          | cytosol; mti           | catalytic       | ai                 | P01006, F27430 | 27430      | ENSG000001   | MAT2B        | 5           | Metabolic   | Trans-sulf  | Ub-specific  | 15          | 0.964       | 0.592027399 | 10.02   | 9682.6  | 10045.9 | 5.16  | 2.76 | High | High | High | High | High | High | 1 |
| FALSE | High | Master Prq Q0Q0C0-1  | E3 ubiquti   | 0     | 8.881   | 3  | 1  | 1   | 1  | 670  | 74.6  | 7.15  | 6.58   | 1  | cell death; membrane               | catalytic              | ai              | P00097, F84231     | 84231          | ENSG000001 | TRAF7        | 16           |             |             | Antigen pr  | 4            | 0.964       | 0.597744005 | 10.12       | 85.2    | 88.4    | 20.2    | 10.92 | High | High | High | High | High | High | 1    |   |
| FALSE | High | Master Prq Q09J01    | THO com      | 0.001 | 4.385   | 5  | 2  | 2   | 2  | 351  | 38.7  | 6.09  | 4.61   | 2  | metabolic                          | nucleus                | protein bir     | P04000, F84321     | 84321          | ENSG000001 | THOC3        | 5            | RNA trans   |             | Cleavage o  | 11           | 0.964       | 0.672376651 | 29.62       | 704.5   | 719     | 32.49   | 13.42 | High | High | High | High | High | High | 1    |   |
| FALSE | High | Master Prq Q01473    | Tripeptidyl  | 0     | 30.388  | 17 | 6  | 8   | 6  | 563  | 61.2  | 6.48  | 17.37  | 6  | cell differe                       | mitochondr             | catalytic       | ai                 | P09286         | 1200       | ENSG000001   | TPP1         | 1           | Lysoosom    |             | XBP1(S) ac   | 5           | 0.964       | 0.706653186 | 23.8    | 1318.6  | 1367.9  | 18.51 | 3.07 | High | High | High | High | High | High | 1 |
| FALSE | High | Master Prq Q08620-1  | Protein TB   | 0     | 23.053  | 10 | 6  | 7   | 6  | 631  | 70.7  | 7.42  | 17.93  | 6  | metabolic                          | mitochondr             | catalytic       | ai                 | P06143, F9238  | 9238       | ENSG000001   | TRBG4        | 7           |             |             |              | 0           | 0.964       | 0.873842393 | 6.71    | 1823.3  | 1938.7  | 13.6  | 4.66 | High | High | High | High | High | High | 1 |
| FALSE | High | Master Prq P1614-3   | Isomorf Be   | 0     | 24.351  | 5  | 5  | 5   | 5  | 1805 | 200.6 | 6.3   | 9.76   | 5  | cell comm; cell surface protein    | bir                    | P00041, F3691   | 3691               | ENSG000001     | ITGB4      | 1            | Integrin-m   |             |             | 8           | 0.964        | 0.997848824 | 7.51        | 373.9       | 396     | 15.31   | 5.4     | High  | High | High | High | High | High | 1    |      |   |
| FALSE | High | Master Prq P16240    | Valine-1R    | 0     | 138.247 | 28 | 26 | 42  | 26 | 1264 | 104.4 | 7.59  | 101.07 | 26 | metabolic                          | cytoplasm; catalytic   | ai              | P00043, F7407; 571 | 7407; 571      | ENSG000001 | VARS, VAR    | 6; CHR_H     | 5           | Aminoacyl   | Amino Acid  | Cytosolic ti | 6           | 0.963       | 0.941688962 | 1.67    | 9776.1  | 10340.3 | 2.85  | 2    | High | High | High | High | High | High | 1 |
| FALSE | High | Master Prq Q0UNM6    | 265 protea   | 0     | 43.828  | 25 | 9  | 12  | 9  | 376  | 42.9  | 5.81  | 32.05  | 9  | cell organ; cytosol; ext           | catalytic              | ai              | P01399             | 5719           | ENSG000001 | PSMD13       | 11           | Epstein-Ba  | Proteasom   | Regulation  | 153          | 0.963       | 0.486750454 | 3.22        | 3198.9  | 3217.2  | 4.99    | 5.9   | High | High | High | High | High | High | 1    |   |
| FALSE | High | Master Prq Q015160   | DNA-direct   | 0     | 19.329  | 18 | 4  | 6   | 4  | 346  | 39.2  | 5.5   | 19.61  | 4  | metabolic                          | cytosol; mti           | catalytic       | ai                 | P01000, F9533  | 9533       | ENSG000001   | POLR1C       | 6           | RNA polyr   |             | RNA Polyr    | 29          | 0.963       | 0.549581282 | 0.95    | 881.5   | 912.7   | 19.22 | 3.4  | High | High | High | High | High | High | 1 |
| FALSE | High | Master Prq Q09K45-1  | cleft lip an | 0     | 11.415  | 5  | 2  | 3   | 2  | 538  | 62.2  | 8.56  | 10.23  | 2  | cell death; membrane               |                        | P05602          | 81037              | ENSG000001     | CLPTM1L    | 5; CHR_H     | 5            |             |             |             | 0            | 0.963       | 0.550879254 | 13.15       | 576.6   | 598.6   | 5.56    | 4.48  | High | High | High | High | High | High | 1    |   |
| FALSE | High | Master Prq Q015235   | 28S riboso   | 0     | 6.486   | 18 | 1  | 2   | 1  | 138  | 15.2  | 10.29 | 8.61   | 1  | cell organ; membrane               | protein bir            | P01004          | 6183               | ENSG000001     | MSPS12     | 19; CHR_H    | 19           | Ribosome    |             | Ribosome    | 0            | 0.963       | 0.564360464 | 26.98       | 183.5   | 172.2   | 31.49   | 18.69 | High | High | High | High | High | High | 1    |   |
| FALSE | High | Master Prq P22262    | heterogen    | 0     | 278.425 | 77 | 34 | 180 | 32 | 353  | 37.4  | 8.95  | 407.22 | 34 | metabolic                          | cytoplasm; DNA bindi   | P00076, F3181   | 3181               | ENSG000001     | HNRP2A1    | 7            |              |             | mRNA Pro    | XBP1(S) ac  | 10           | 0.963       | 0.815160634 | 30.13       | 41543.4 | 43155.3 | 9.26    | 12.34 | High | High | High | High | High | High | 1    |   |
| FALSE | High | Master Prq P51588    | hepatoma     | 0     | 126.367 | 61 | 15 | 52  | 14 | 240  | 26.8  | 4.73  | 128.69 | 15 | cell differe                       | cytoplasm; DNA bindi   | P00065, 3068    | 3068               | ENSG000001     | HDNF9      | 6            |              |             | Gene and i  | 4           | 0.962        | 0.039792886 | 1.56        | 12605       | 13238.2 | 4.78    | 3.82    | High  | High | High | High | High | High | 1    |      |   |
| FALSE | High | Master Prq P55265-1  | Double-str   | 0     | 107.513 | 23 | 24 | 45  | 24 | 1226 | 136   | 8.65  | 91.05  | 24 | cell differe                       | cytoplasm; catalytic   | ai              | P00035, F103       | 103            | ENSG000001 | ADAR         | 1            | Influenza A |             | OS deamin   | 12           | 0.962       | 0.050761731 | 2.07        | 11652.5 | 11950.1 | 5.21    | 5.53  | High | High | High | High | High | High | 1    |   |
| FALSE | High | Master Prq P83881    | 60S riboso   | 0     | 12.767  | 25 | 4  | 5   | 4  | 106  | 12.4  | 10.58 | 11.6   | 4  | cell organ; cytoplasm; protein     | bir                    | P00035          | 6173               | ENSG000001     | PSA4       | 3            | Ribosome     | Cytoplasm   | Peptide ch  | 34          | 0.962        | 0.355672456 | 7.26        | 2404.2      | 2572.7  | 13.42   | 7.21    | High  | High | High | High | High | High | 1    |      |   |
| FALSE | High | Master Prq Q08Z19    | BH3-intera   | 0     | 10.683  | 14 | 2  | 3   | 2  | 195  | 22    | 5.44  | 10.01  | 2  | cell death; cytoplasm              |                        | P06193          | 637                | ENSG000001     | BID        | 22           |              |             |             |             |              |             |             |             |         |         |         |       |      |      |      |      |      |      |      |   |

|       |        |                     |             |       |         |    |    |     |    |      |       |      |        |    |                                        |                         |              |            |           |             |             |             |             |             |             |             |         |         |        |       |      |      |      |      |      |      |      |      |   |
|-------|--------|---------------------|-------------|-------|---------|----|----|-----|----|------|-------|------|--------|----|----------------------------------------|-------------------------|--------------|------------|-----------|-------------|-------------|-------------|-------------|-------------|-------------|-------------|---------|---------|--------|-------|------|------|------|------|------|------|------|------|---|
| FALSE | High   | Master Prq Q60488-1 | Long-chain  | 0     | 45.847  | 19 | 9  | 12  | 7  | 711  | 79.1  | 8.38 | 36.04  | 9  | cell differe                           | cytoplasm; catalytic ac | P00501, 2182 | ENSG000001 | ACSL4     | X           | Peroxisom   | Fatty Acid  | Synthesis c | 16          | 0.958       | 0.234391454 | 4.73    | 1810.9  | 1890.3 | 1.26  | 5.07 | High | 1 |
| FALSE | High   | Master Prq Q60488-1 | Program     | 0     | 122.729 | 36 | 22 | 35  | 22 | 868  | 96    | 6.52 | 75.5   | 22 | cell death; cytoplasm; protein bi      | P00501, 2182            | ENSG000001   | ACSL4      | X         | Endocytos   | Budding ar  |             | 9           | 0.958       | 0.276738013 | 4.24        | 5522.7  | 5766.1  | 1.06   | 3.04  | High | 1    |   |
| FALSE | Medium | Master Prq P49642   | DNA prim    | 0.024 | 1.521   | 2  | 1  | 1   | 1  | 420  | 49.9  | 8.21 | 2.29   | 1  | cell organ; membrane; catalytic ac     | P01896, 5557            | ENSG000001   | PRIM1      | 12        | Metabolic   | Retinol/as  | Activation  | 32          | 0.958       | 0.434024242 | 11.24       | 657.3   | 686.4   | 8      | 2.19  | High | 1    |   |
| FALSE | High   | Master Prq P51570   | galactinol  | 0     | 21.485  | 21 | 6  | 6   | 6  | 392  | 42.2  | 6.46 | 15.52  | 6  | metabolic; cytoplasm; catalytic ac     | P08544, 2584            | ENSG000001   | GALK1      | 17        | Metabolic   | Galactose c |             | 10          | 0.958       | 0.444336683 | 11.66       | 658.4   | 691     | 10.59  | 2.01  | High | 1    |   |
| FALSE | High   | Master Prq P11940-1 | polyadeny   | 0     | 203.942 | 50 | 33 | 102 | 22 | 636  | 70.6  | 9.5  | 199.74 | 33 | metabolic; cytoplasm; protein bi       | P00076, 26986           | ENSG000001   | PABPC1     | 8         | mRNA sur    | Translator  | AUF1 (hnR   | 24          | 0.958       | 0.478616063 | 12.44       | 16114.1 | 16815.9 | 5.18   | 4.43  | High | 1    |   |
| FALSE | High   | Master Prq Q9NVU2   | ADP-ribos   | 0     | 19.783  | 24 | 4  | 5   | 4  | 186  | 21.5  | 8.43 | 7.36   | 4  | cell division; cytoplasm; catalytic ac | P00025, 55207           | ENSG000001   | ARL8B      | 3         |             |             |             | 0           | 0.958       | 0.638775973 | 46.58       | 681.3   | 804.2   | 54.92  | 9.65  | High | 1    |   |
| FALSE | High   | Master Prq Q12874   | splicing fa | 0     | 79.644  | 26 | 10 | 18  | 10 | 501  | 58.8  | 5.38 | 58.31  | 10 | cell organ; nucleus; metal ion         | P111931, F 10946        | ENSG000001   | F3A3       | 1         | Spliceosom  | Exercise in | mRNA Spli   | 7           | 0.958       | 0.692441446 | 2.86        | 3906.1  | 3968    | 14.52  | 1.86  | High | 1    |   |
| FALSE | High   | Master Prq Q43427   | Acidic fibr | 0.002 | 3.608   | 4  | 1  | 1   | 1  | 364  | 41.9  | 6.48 | 0      | 1  | regulation; membrane; protein bi       | P05427, 9158            | ENSG000001   | FBP        | 11        |             |             |             | 0           | 0.958       | 0.844412296 | 4.11        | 490.4   | 507.3   | 10.13  | 2.81  | High | 1    |   |
| FALSE | High   | Master Prq P54727   | UV exciso   | 0     | 63.457  | 26 | 9  | 23  | 8  | 409  | 43.1  | 4.84 | 66.31  | 9  | cell organ; cytoplasm; DNA bindi       | P00240, F 5887          | ENSG000001   | NAD23B     | 9         | Nucleotide  | Joseph d    |             | 13          | 0.958       | 0.900642115 | 16.43       | 3564.1  | 3720.2  | 17.34  | 1.39  | High | 1    |   |
| FALSE | High   | Master Prq Q9GVP9-1 | THO comp    | 0     | 14.128  | 6  | 4  | 5   | 4  | 657  | 75.6  | 4.98 | 11.23  | 4  | cell death; cytoplasm; DNA bindi       | P00531, F 9984          | ENSG000001   | THOC1      | 18        | Spliceosom  | Cleavage o  |             | 11          | 0.958       | 0.971216644 | 40.31       | 1681.4  | 1754.4  | 21.94  | 9.4   | High | 1    |   |
| FALSE | High   | Master Prq P62333   | 26S protea  | 0     | 128.137 | 47 | 16 | 35  | 16 | 389  | 44.1  | 7.49 | 110.05 | 16 | cell organ; cytoplasm; catalytic ac    | P00004, F 5706          | ENSG000001   | PSMCG      | 14        | Epstein-Ba  | Proteasom   | Regulation  | 152         | 0.957       | 0.069998828 | 2.29        | 14535.7 | 14817   | 3.07   | 1.98  | High | 1    |   |
| FALSE | High   | Master Prq P49915   | GMP synt    | 0     | 164.002 | 54 | 29 | 61  | 29 | 693  | 76.7  | 6.87 | 177.69 | 29 | metabolic; cytoplasm; catalytic ac     | P00117, F 8833          | ENSG000001   | GMP5       | 3         | Metabolic   | Purine ribc |             | 7           | 0.957       | 0.165501114 | 1.68        | 13454.4 | 13842.9 | 1.95   | 3.84  | High | 1    |   |
| FALSE | High   | Master Prq Q01844   | RNA-bindi   | 0     | 75.157  | 15 | 7  | 23  | 7  | 656  | 68.4  | 9.33 | 76.71  | 7  | metabolic; cytoplasm; metal ion        | P00076, F 2130          | ENSG000001   | EWSR1      | 22        | Transcripti |             |             | 1           | 0.957       | 0.265499649 | 3.75        | 8406    | 9079.8  | 3.97   | 6.74  | High | 1    |   |
| FALSE | High   | Master Prq Q9UHX1-1 | poly(U)-bi  | 0     | 69.101  | 28 | 12 | 19  | 12 | 559  | 59.8  | 5.29 | 61.83  | 12 | cell death; nucleus                    | P00076, F 22827         | ENSG000001   | PUF60      | 8, CHR_H  | Spliceosom  | mRNA Spli   | 5           | 0.957       | 0.365897986 | 8.59        | 8566.9      | 8948.3  | 11.59   | 2.8    | High  | High | High | High | High | High | High | 1    |      |   |
| FALSE | High   | Master Prq P08397-1 | porphobili  | 0     | 22.55   | 14 | 3  | 4   | 3  | 361  | 39.3  | 7.18 | 17.2   | 3  | metabolic; cytoplasm; catalytic ac     | P01375, F 3145          | ENSG000001   | HMB5       | 11, CHR_H | Metabolic   | Heme Bios   | Heme bios   | 6           | 0.957       | 0.58828505  | 30.84       | 104.3   | 109     | 23.29  | 16.44 | High | 1    |   |
| FALSE | High   | Master Prq Q06830   | peroxired   | 0     | 246.775 | 82 | 20 | 165 | 16 | 199  | 22.1  | 8.13 | 369.04 | 20 | cell prolif; cytoplasm; antioxiand     | P00578, F 5052          | ENSG000001   | PRDX1      | 1         | Peroxisom   | Androgen    | TP53 Regu   | 15          | 0.957       | 0.635566479 | 4.03        | 41411.7 | 39795.5 | 6.46   | 5.1   | High | 1    |   |
| FALSE | High   | Master Prq P46379-1 | Large rrib  | 0     | 44.109  | 10 | 8  | 15  | 8  | 1132 | 119.3 | 5.6  | 47.87  | 8  | cell death; cytoplasm; protein bi      | P00240, F 7917          | ENSG000001   | BAG6       | 6, CHR_H  |             |             | 0           | 0.957       | 0.636715398 | 28.4        | 1575.9      | 1645.9  | 39.84   | 4.66   | High  | High | High | High | High | High | High | 1    |      |   |
| FALSE | High   | Master Prq P43246-1 | DNA misri   | 0     | 111.458 | 26 | 18 | 34  | 18 | 934  | 104.7 | 5.77 | 89.1   | 18 | cell death; membrane; catalytic ac     | P00488, F 4436          | ENSG000001   | MSH2       | 2         | Colorectal  | Rack/Pact1  | Defective f | 20          | 0.957       | 0.826546096 | 2.5         | 6177.7  | 6229.5  | 4.88   | 3.48  | High | 1    |   |
| FALSE | High   | Master Prq Q14839   | Chromodo    | 0     | 20.454  | 4  | 4  | 4   | 3  | 1912 | 217.9 | 5.86 | 12.63  | 4  | cell organ; cytoplasm; catalytic ac    | P00176, F 1108          | ENSG000001   | CHD4       | 12        | Viral carci | ERCC6 (CS   |             | 21          | 0.957       | 0.921918792 | 39.83       | 725.6   | 759.6   | 27.11  | 5.74  | High | 1    |   |
| FALSE | High   | Master Prq Q02790   | Peptidyl-pi | 0     | 128.024 | 64 | 23 | 44  | 22 | 459  | 51.8  | 5.43 | 102.2  | 23 | cell organ; cytoplasm; catalytic ac    | P00254, F 2288          | ENSG000001   | FKBP4      | 14        | Estrogen s  | Androgen    | Attenuatio  | 8           | 0.956       | 0.091173601 | 3.34        | 14830.5 | 15594.1 | 2.92   | 6.04  | High | 1    |   |
| FALSE | High   | Master Prq P55786   | purinomy    | 0     | 103.585 | 31 | 20 | 36  | 20 | 919  | 103.2 | 5.72 | 97.64  | 20 | metabolic; cytoplasm; catalytic ac     | P01433, F 9520          | ENSG000001   | NPEPP5     | 17        |             | Antigen pr  |             | 4           | 0.956       | 0.160117764 | 5.05        | 8480.3  | 8616.6  | 1.68   | 3.83  | High | 1    |   |
| FALSE | High   | Master Prq Q95298-1 | NADH deH    | 0.001 | 4.42    | 7  | 1  | 3   | 1  | 119  | 14.2  | 98.6 | 2.14   | 1  | cell organ; cytoplasm; catalytic ac    | P06374, 4718; 1001      | ENSG000001   | NDUFC2     | 11        | Alzheimer's | Electron Tr | Neutrophil  | 16          | 0.956       | 0.166177614 | 5.2         | 642.5   | 671.9   | 5.04   | 1.19  | High | 1    |   |
| FALSE | High   | Master Prq Q9UDV8   | Mucosa-as   | 0     | 6.499   | 3  | 2  | 2   | 2  | 824  | 92.2  | 5.73 | 4.06   | 2  | cell differe; cytoplasm; catalytic ac  | P00047, F 10892         | ENSG000001   | MALT1      | 13        | NF-kappa B  | Cell Rece   | CLEC7A/in   | 20          | 0.956       | 0.28312258  | 1.44        | 92.2    | 103.9   | 12.51  | 5.82  | High | 1    |   |
| FALSE | High   | Master Prq Q92598   | Heat shock  | 0     | 204.681 | 44 | 31 | 61  | 27 | 858  | 96.8  | 5.39 | 171.97 | 31 | metabolic; cytoplasm; enzyme re        | P00012                  | ENSG000001   |            | 13        | Protein prc | Scavengin   |             | 8           | 0.956       | 0.312045697 | 6.58        | 17821.5 | 18466.2 | 10.68  | 2.5   | High | 1    |   |
| FALSE | High   | Master Prq Q9NS43   | prolyl 3-hy | 0     | 10.591  | 7  | 4  | 4   | 4  | 542  | 63.2  | 5.11 | 4.65   | 4  | cell organ; cytoplasm; catalytic ac    | P110637, F 55239        | ENSG000001   | OGG1D1     | 22        |             |             |             | 0           | 0.956       | 0.322376011 | 7.11        | 833.8   | 874.2   | 6.11   | 0.83  | High | 1    |   |
| FALSE | High   | Master Prq P30046   | D-dapach    | 0.003 | 3.476   | 7  | 1  | 2   | 1  | 118  | 12.7  | 7.3  | 0      | 1  | metabolic; cytoplasm; catalytic ac     | P01187                  | ENSG000001   | DDT        | 16        | CHR_H       |             |             | 0           | 0.956       | 0.356502444 | 2.78        | 111.7   | 128.4   | 31.22  | 7.77  | High | 1    |   |
| FALSE | High   | Master Prq P34806-1 | Serine hyd  | 0     | 51.863  | 28 | 8  | 10  | 7  | 483  | 53    | 7.71 | 37.48  | 8  | cell organ; cytoplasm; catalytic ac    | P00464                  | ENSG000001   | SHMT1      | 17        | Glyoxylate  | Folate Met  | Metabolis   | 18          | 0.956       | 0.35897439  | 9.29        | 652.5   | 683.2   | 8.21   | 4.19  | High | 1    |   |
| FALSE | High   | Master Prq Q93731   | Importin-7  | 0     | 85.277  | 19 | 16 | 26  | 15 | 1038 | 119.4 | 4.82 | 67.23  | 16 | defense re; cytoplasm; enzyme re       | P03810, F 10527         | ENSG000001   | IP07       | 11        |             |             |             | 0           | 0.956       | 0.614466341 | 21.82       | 6071    | 6098.6  | 15.28  | 8.83  | High | 1    |   |
| FALSE | High   | Master Prq Q9B978-1 | Uncharact   | 0     | 5.017   | 1  | 1  | 2   | 1  | 1806 | 196.6 | 8.47 | 6.23   | 1  |                                        | P15327                  | ENSG000001   | KIAA1671   | 22        |             |             |             | 0           | 0.956       | 0.62673633  | 38.53       | 299.7   | 313.6   | 48.42  | 3.21  | High | 1    |   |
| FALSE | High   | Master Prq Q98257   | Quinone o   | 0     | 69.45   | 48 | 12 | 20  | 12 | 329  | 35.2  | 8.44 | 58.54  | 12 | cell organ; cytoplasm; catalytic ac    | P00107, F 1429          | ENSG000001   | CRS2       | 5         |             |             |             | 0           | 0.956       | 0.645069251 | 6.1         | 4219.3  | 4158.8  | 6.04   | 4.7   | High | 1    |   |
| FALSE | High   | Master Prq P35052   | Glypican-1  | 0.002 | 4.189   | 2  | 1  | 1   | 1  | 558  | 61.6  | 7.3  | 2.73   | 1  | cell differe; cytosol;eni              | P01153                  | ENSG000001   | GPC1       | 2         | Proteoglyc  | VEGFA-VEC   | Defective f | 29          | 0.956       | 0.647811114 | 15.62       | 907.6   | 877.9   | 19.25  | 11.72 | High | 1    |   |
| FALSE | High   | Master Prq Q2747    | WD40 rep    | 0     | 29.524  | 17 | 6  | 12  | 6  | 513  | 57.5  | 7.18 | 41.48  | 6  | cell organ; cytoplasm; protein bi      | P00400                  | ENSG000001   | SMU1       | 9         |             |             |             | 0           | 0.956       | 0.701812685 | 4.22        | 4724.5  | 4944.3  | 14.08  | 3.63  | High | 1    |   |
| FALSE | High   | Master Prq Q99215   | Leucine-4f  | 0     | 94.107  | 19 | 18 | 26  | 18 | 1176 | 134.4 | 7.3  | 72.38  | 18 | cell comm; cytoplasm; catalytic ac     | P00133, F 51520         | ENSG000001   | LARS       | 5         | Aminoacyl   | Cytosolic s |             | 9           | 0.956       | 0.793605108 | 13.08       | 4934.1  | 5161.3  | 16.16  | 5.48  | High | 1    |   |
| FALSE | High   | Master Prq Q96014   | Protein AB  | 0     | 7.552   | 11 | 2  | 2   | 2  | 210  | 22.3  | 6.4  | 3.05   | 2  | metabolic; cytoplasm; catalytic ac     | P00561, F 84836         | ENSG000001   | ABHD148    | 3         |             | Cytosolic s |             | 4           | 0.956       | 0.865625086 | 63.63       | 491.8   | 572.7   | 45.45  | 15.39 | High | 1    |   |
| FALSE | High   | Master Prq P30740   | Leukocyte   | 0     | 31.653  | 21 | 7  | 13  | 7  | 379  | 42.7  | 6.28 | 27.23  | 7  | regulation; cytoplasm; enzyme re       | P00079                  | ENSG000001   | SERPINC1   | 16        | Amoebasi    | Neutrophil  |             | 4           | 0.956       | 0.914556758 | 8.6         | 1652.1  | 1651.5  | 3.68   | 10.07 | High | 1    |   |
| FALSE | High   | Master Prq Q9BG00   | Mvb-bindin  | 0     | 128.38  | 25 | 26 | 35  | 26 | 1328 | 148.8 | 9.28 | 91.9   | 26 | cell comm; cytoplasm; catalytic ac     | P04031, F 10514         | ENSG000001   | MYBBP1A    | 17        |             | Energy Me   | B-WICH co   | 5           | 0.955       | 0.025435491 | 1.84        | 8553.7  | 8826.4  | 3.84   | 3.39  | High | 1    |   |
| FALSE | High   | Master Prq P07814   | Bifunction  | 0     | 340.821 | 41 | 54 | 106 | 53 | 1512 | 170.5 | 7.33 | 308.99 | 54 | cell organ; cytoplasm; catalytic ac    | P04058, F 2058          | ENSG000001   | EP85       | 1         | Aminoacyl   | Parkinsons  | tRNA mod    | 16          | 0.955       | 0.121362673 | 0.95        | 29787.9 | 31702.7 | 3.4    | 1.67  | High | 1    |   |
| FALSE | High   | Master Prq Q9UHA3   | Probable r  | 0     | 16.964  | 21 | 3  | 4   | 3  | 163  | 19.6  | 9.98 |        |    |                                        |                         |              |            |           |             |             |             |             |             |             |             |         |         |        |       |      |      |      |      |      |      |      |      |   |

|       |      |                     |              |       |         |    |    |     |    |      |        |       |        |    |                                  |              |    |                    |            |              |    |             |             |                       |           |       |             |             |         |         |         |       |      |      |      |      |      |      |      |      |   |
|-------|------|---------------------|--------------|-------|---------|----|----|-----|----|------|--------|-------|--------|----|----------------------------------|--------------|----|--------------------|------------|--------------|----|-------------|-------------|-----------------------|-----------|-------|-------------|-------------|---------|---------|---------|-------|------|------|------|------|------|------|------|------|---|
| FALSE | High | Master Prq Q75477   | erlin-1 [OS] | 0     | 27.951  | 22 | 6  | 6   | 3  | 346  | 38.9   | 7.87  | 17.73  | 6  | metabolic; endoplasmic reticulum | protein      | bi | P11445, 10613      | ENSG000001 | ERLIN1       | 10 |             |             | ABC family            | 6         | 0.951 | 0.339327129 | 5.36        | 282.5   | 320.3   | 8.27    | 14.83 | High | 1    |   |
| FALSE | High | Master Prq Q818W8   | Calcium hc   | 0     | 33.642  | 11 | 6  | 9   | 6  | 916  | 103.63 | 9.04  | 22.52  | 6  | cellular hsc cytoplasm;          | protein      | bi | P10585, 10523      | ENSG000001 | CHEP1        | 19 | Spliceosom  |             | mRNA Spli             | 5         | 0.951 | 0.455059513 | 15.86       | 933.2   | 983.5   | 17.37   | 7.36  | High | 1    |   |
| FALSE | High | Master Prq Q818W8   | Iron-sulfur  | 0     | 7.969   | 19 | 2  | 2   | 2  | 129  | 14.2   | 9.07  | 2.69   | 2  | cell organ; mitochondrion        | metal ion    | bi | P105121, 81689     | ENSG000001 | ISCA1        | 19 |             |             | Mitochondr            | 2         | 0.951 | 0.595113836 | 17.43       | 626.5   | 652     | 10.67   | 17.3  | High | 1    |   |
| FALSE | High | Master Prq P35270   | Septaplines  | 0     | 16.005  | 19 | 4  | 5   | 4  | 261  | 28     | 8.05  | 13.43  | 4  | metabolic; cytoplasm;            | catalytic ac | bi | P100066, 6697      | ENSG000001 | SPR          | 2  | Folate bios |             | eNOS activ            | 6         | 0.951 | 0.699375068 | 26.99       | 253.9   | 266.4   | 12.56   | 9.61  | High | 1    |   |
| FALSE | High | Master Prq Q818W8   | Membrane     | 0     | 6.663   | 9  | 1  | 1   | 1  | 233  | 23.8   | 4.88  | 5.86   | 1  | regulation; cytoplasm;           | protein      | bi | P100373, 10424     | ENSG000001 | PGRM2        | 4  |             |             |                       | 0         | 0.951 | 0.823828411 | 8.36        | 91.3    | 90.9    | 4.79    | 9.05  | High | 1    |   |
| FALSE | High | Master Prq P23919   | thymidylat   | 0     | 19.499  | 29 | 7  | 9   | 7  | 212  | 23.8   | 8.27  | 8.38   | 7  | cell differe; cytoplasm;         | catalytic ac | bi | P100406, 1841      | ENSG000001 | DYRK4        | 10 | Pyrimidine  |             | Interconve            | 5         | 0.951 | 0.458889274 | 2.6         | 1318.1  | 1338.3  | 8.32    | 14.69 | High | 1    |   |
| FALSE | High | Master Prq Q818W8   | Ribosome     | 0     | 28.662  | 30 | 10 | 16  | 10 | 353  | 41.4   | 9.92  | 30.33  | 10 | cell organ; nucleus              | RNA bindi    | bi | P100427, 55299     | ENSG000001 | BRX1         | 5  |             |             | Gastric car           | 1         | 0.951 | 0.885884015 | 17.07       | 2366.5  | 2489.4  | 10.41   | 6.11  | High | 1    |   |
| FALSE | High | Master Prq Q16891   | MICOS con    | 0     | 41.904  | 15 | 10 | 14  | 10 | 758  | 83.6   | 6.48  | 34.62  | 10 | cell organ; membrane             | protein      | bi | P109731, 10989     | ENSG000001 | NMMT         | 2  |             |             | Cristae for           | 3         | 0.951 | 0.998185905 | 4.38        | 2781.3  | 2831.9  | 8.3     | 4.33  | High | 1    |   |
| FALSE | High | Master Prq Q91807   | UPF0160 f    | 0     | 43.471  | 28 | 8  | 12  | 8  | 376  | 42.4   | 6.67  | 31.22  | 8  | response i; mitochondrion        |              | bi | P103690, 60314     | ENSG000001 | C12orf10     | 12 |             |             |                       | 0         | 0.95  | 0.15660261  | 2.21        | 4304.9  | 4370.8  | 2.26    | 3.61  | High | 1    |   |
| FALSE | High | Master Prq Q818W8   | alpha-keto   | 0     | 9.842   | 7  | 2  | 2   | 2  | 505  | 58.2   | 5.22  | 5.18   | 2  | metabolic; nucleus               | catalytic ac | bi | P112933, 79968     | ENSG000001 | CTD16        | 16 |             |             | F/OB Revers           | 4         | 0.95  | 0.229330769 | 6.47        | 105.1   | 110.6   | 11.02   | 6.17  | High | 1    |   |
| FALSE | High | Master Prq Q95861-1 | 317[2,5'-bi  | 0     | 9.053   | 8  | 1  | 1   | 1  | 308  | 33.4   | 5.69  | 3.81   | 1  | metabolic; cytosol               | catalytic ac | bi | P100459, 10380     | ENSG000001 | BPNT1        | 1  | Metabolic   |             | Cytosolic v           | 6         | 0.95  | 0.550221698 | 8.11        | 44.1    | 45.4    | 3.5     | 10.61 | High | 1    |   |
| FALSE | High | Master Prq Q96GX5-1 | Serine/thr   | 0.001 | 4.259   | 2  | 2  | 2   | 1  | 879  | 97.3   | 5.99  | 0      | 2  | cell divisio; cytoplasm;         | catalytic ac | bi | P100069, F 84930   | ENSG000001 | MASTL        | 10 | Amino su    |             | Glycolysis            | 5         | 0.95  | 0.61170361  | 16.12       | 224.7   | 244.5   | 21.62   | 11.11 | High | 1    |   |
| FALSE | High | Master Prq Q818W8   | Serine/arg   | 0     | 74.698  | 18 | 15 | 21  | 15 | 904  | 102.3  | 11.84 | 40.58  | 15 | metabolic; cytosol;nu            | DNA bindi    | bi | P104180, 10250     | ENSG000001 | SRRM1        | 1  | mRNA sur    | mRNA Pro    | Cleavage o            | 14        | 0.95  | 0.617665909 | 5.63        | 6097.9  | 6131.4  | 2.9     | 7.22  | High | 1    |   |
| FALSE | High | Master Prq Q818W8   | Polymeras    | 0     | 12.703  | 7  | 2  | 2   | 2  | 421  | 46.1   | 9.99  | 4.85   | 2  | metabolic; cytoplasm;            | protein      | bi | P100076, F 84271   | ENSG000001 | POLDIP3      | 22 |             |             | Cleavage o            | 9         | 0.95  | 0.626042726 | 6.79        | 269.5   | 281.6   | 18.14   | 11.25 | High | 1    |   |
| FALSE | High | Master Prq P35580   | Myosin-10    | 0     | 92.505  | 12 | 18 | 25  | 9  | 1976 | 228.9  | 5.54  | 64.64  | 18 | cell organ; cytoplasm;           | catalytic ac | bi | P100063, F 4628    | ENSG000001 | MYH10        | 17 | Salmonella  | Regulation  | RHO GTPa              | 18        | 0.95  | 0.694347357 | 13.47       | 1767.3  | 1855.7  | 24.31   | 3.19  | High | 1    |   |
| FALSE | High | Master Prq P47813   | NFATC2-in    | 0     | 7.446   | 4  | 1  | 2   | 1  | 419  | 45.8   | 6.6   | 9.98   | 1  | metabolic; cytoplasm;            | protein      | bi | P115176, 84901     | ENSG000001 | NFATC2IP     | 16 |             |             |                       | 0         | 0.95  | 0.69966973  | 17.49       | 328.1   | 329.5   | 9.57    | 6.95  | High | 1    |   |
| FALSE | High | Master Prq P47813   | Eukaryotic   | 0     | 64.435  | 55 | 9  | 28  | 9  | 144  | 16.5   | 5.24  | 65.59  | 9  | metabolic; cytosol               | protein      | bi | P101176, 1964; 107 | ENSG000001 | EIF1AX; LO X | 1  | RNA trans   | Translation | Formation             | 13        | 0.949 | 0.101192287 | 3.13        | 13262.4 | 13981.4 | 7.17    | 3.29  | High | 1    |   |
| FALSE | High | Master Prq P10644   | cAMP-dep     | 0     | 17.818  | 17 | 5  | 5   | 4  | 381  | 43     | 5.35  | 13.62  | 5  | cell organ; cytoplasm;           | catalytic ac | bi | P100027, F 5573    | ENSG000001 | PRKAR1A      | 1  |             |             | Insulin sign          | 33        | 0.949 | 0.489597575 | 23.36       | 567.1   | 613     | 23.15   | 16.78 | High | 1    |   |
| FALSE | High | Master Prq Q15427   | Splicing fac | 0     | 17.358  | 9  | 2  | 4   | 4  | 424  | 44.4   | 8.56  | 14.99  | 2  | metabolic; nucleus;sp            | protein      | bi | P100076, F 10262   | ENSG000001 | SF3B4        | 1  | Spliceosom  | mRNA Pro    | mRNA Spli             | 7         | 0.949 | 0.570440958 | 5.24        | 655.2   | 641.1   | 4.89    | 8.76  | High | 1    |   |
| FALSE | High | Master Prq P46926   | glucosami    | 0     | 25.884  | 24 | 4  | 5   | 4  | 289  | 32.6   | 6.92  | 12.96  | 4  | metabolic; cytoplasm;            | catalytic ac | bi | P101182, 10007     | ENSG000001 | GNDA1        | 5  | Amino su    |             | Glycolysis            | 6         | 0.949 | 0.667747732 | 19.78       | 1522.4  | 1831.9  | 19.73   | 10.76 | High | 1    |   |
| FALSE | High | Master Prq P54619-1 | 5'-AMP-ac    | 0     | 13.453  | 12 | 3  | 4   | 3  | 331  | 37.6   | 6.92  | 7.3    | 1  | cell comm; cytosol;me            | catalytic ac | bi | P100478, F 5571    | ENSG000001 | PRKAG1       | 12 | Adipocytol  | AMP-activ   | Translocat            | 36        | 0.949 | 0.680665222 | 27.87       | 741.1   | 827.9   | 43.58   | 7.54  | High | 1    |   |
| FALSE | High | Master Prq Q13631-1 | Myotubulu    | 0.003 | 3.186   | 2  | 1  | 2   | 1  | 665  | 74.6   | 7.14  | 5.97   | 3  | metabolic; cytoplasm;            | catalytic ac | bi | P100283, F 8776    | ENSG000001 | MTMR1        | 1  | Metabolic   |             | Synthesis c           | 8         | 0.949 | 0.869965175 | 4.23        | 379.2   | 394.9   | 4.68    | 10.01 | High | 1    |   |
| FALSE | High | Master Prq Q07157   | Tight junc   | 0     | 34.067  | 5  | 7  | 8   | 7  | 1748 | 195.3  | 6.7   | 20.42  | 7  | cell comm; cytoplasm;            | protein      | bi | P100018, F 7082    | ENSG000001 | TIP1         | 15 | Adherens j  |             | c-src medi            | 23        | 0.948 | 0.080362926 | 1.48        | 1146.8  | 1210.3  | 3.12    | 0.66  | High | 1    |   |
| FALSE | High | Master Prq Q15054   | DNA polyn    | 0     | 8.555   | 5  | 2  | 2   | 2  | 466  | 51.4   | 9.35  | 5.86   | 2  | cell organ; cytoplasm;           | catalytic ac | bi | P100597, F 10714   | ENSG000001 | POLD3        | 11 | Base excis  | Homologous  | Mismatch              | 53        | 0.948 | 0.20733172  | 3.86        | 1451.5  | 1571    | 1.81    | 7.65  | High | 1    |   |
| FALSE | High | Master Prq Q9Y3U8   | 60S ribos    | 0     | 24.507  | 30 | 5  | 12  | 5  | 105  | 12.2   | 11.59 | 26.04  | 5  | cell organ; cytoplasm;           | RNA bindi    | bi | P101158, 25873     | ENSG000001 | RL36         | 19 | Ribosome    |             | Cytoplasm; Peptide ch | 34        | 0.948 | 0.387257222 | 12.23       | 6079    | 5990    | 15.71   | 5.88  | High | 1    |   |
| FALSE | High | Master Prq P48147   | prolyl end   | 0     | 53.763  | 23 | 13 | 17  | 13 | 710  | 80.6   | 5.86  | 44.21  | 13 | metabolic; cytoplasm;            | catalytic ac | bi | P100267, F 5550    | ENSG000001 | PREP         | 6  | Renin-angi  |             |                       | 1         | 0.948 | 0.395877237 | 1.34        | 3030.8  | 3163.4  | 1.07    | 4.04  | High | 1    |   |
| FALSE | High | Master Prq Q9UKV8   | Protein aris | 0     | 15.576  | 5  | 3  | 3   | 3  | 859  | 97.1   | 0.19  | 12.35  | 3  | cell organ; cytoplasm;           | catalytic ac | bi | P102170, F 27161   | ENSG000001 | AGO2; EIF    | 8  |             |             | Post-trans            | 26        | 0.948 | 0.402693708 | 5.45        | 997.9   | 1053.1  | 1.07    | 5.17  | High | 1    |   |
| FALSE | High | Master Prq Q60518   | ran-bindin   | 0     | 14.282  | 6  | 5  | 8   | 3  | 1105 | 124.6  | 5.01  | 10.47  | 5  | transport; cytoplasm;            | protein      | bi | P112755, F 26953   | ENSG000001 | RANBP6       | 9  |             |             |                       | 0         | 0.948 | 0.459769032 | 19.33       | 145.6   | 162     | 19.9    | 15.2  | High | 1    |   |
| FALSE | High | Master Prq P25685   | dnaI homc    | 0     | 30.375  | 25 | 8  | 11  | 8  | 340  | 38     | 8.63  | 20.71  | 8  | cell organ; cytoplasm;           | catalytic ac | bi | P100210, F 3337    | ENSG000001 | DNAI1B       | 19 | Influenza A | NP22        | Trans MAPK6/M         | 13        | 0.948 | 0.65302278  | 16.66       | 1926.9  | 2031.8  | 6.98    | 5.91  | High | 1    |   |
| FALSE | High | Master Prq P19532   | Transcript   | 0     | 5.308   | 4  | 3  | 3   | 3  | 575  | 61.5   | 5.58  | 2.28   | 3  | metabolic; cytosol;nu            | DNA bindi    | bi | P100060, 7030      | ENSG000001 | TFE3         | X  | Transcript  |             | TGF-beta f            | 2         | 0.948 | 0.726901828 | 22.96       | 1469.6  | 1549.6  | 21.75   | 13.83 | High | 1    |   |
| FALSE | High | Master Prq Q9Y320   | Thioredoxin  | 0     | 14.926  | 21 | 4  | 4   | 4  | 296  | 34     | 8.69  | 8.12   | 4  | cellular hsc membrane            |              | bi | P100085, 51075     | ENSG000001 | TMX2         | 11 |             |             |                       | 0         | 0.948 | 0.871949682 | 18.55       | 469     | 508     | 19.59   | 4.1   | High | 1    |   |
| FALSE | High | Master Prq Q08211   | Atp-depen    | 0     | 299.525 | 46 | 50 | 116 | 50 | 1270 | 140.9  | 6.84  | 311.12 | 50 | cell death; cytoplasm;           | catalytic ac | bi | P100035, F 1660    | ENSG000001 | DHXR1        | 10 |             |             | mRNA Pro              | TRAFF6 me | 34    | 0.948       | 0.889350727 | 0.65    | 23857.3 | 23833.1 | 5.18  | 4.91 | High | 1 |
| FALSE | High | Master Prq Q99210   | Cleavage a   | 0     | 10.943  | 6  | 4  | 5   | 4  | 782  | 88.4   | 5.11  | 6.6    | 4  | metabolic; membrane              | protein      | bi | P100753, F 53981   | ENSG000001 | CPSF2        | 14 | mRNA sur    | mRNA Pro    | mRNA 3'-e             | 16        | 0.947 | 0.115540265 | 0.29        | 794.7   | 921     | 8.73    | 8.39  | High | 1    |   |
| FALSE | High | Master Prq Q96525   | 2-aminoet    | 0.002 | 3.561   | 9  | 1  | 1   | 1  | 270  | 29.7   | 6.04  | 2.2    | 1  | metabolic; cytosol;me            | catalytic ac | bi | P107847, 84890     | ENSG000001 | ATG10        | 10 | Taurine an  |             | Degradat              | 6         | 0.947 | 0.22237296  | 0.38        | 235.4   | 268.6   | 15.38   | 7.4   | High | 1    |   |
| FALSE | High | Master Prq Q43847-1 | Nardilytin   | 0     | 39.984  | 9  | 8  | 12  | 8  | 1150 | 131.5  | 5     | 34.37  | 8  | cell organ; cell surface         | catalytic ac | bi | P100675, F 4898    | ENSG000001 | NDR1; NRI    | 1  |             |             |                       | 0         | 0.947 | 0.259807642 | 6.04        | 4156.4  | 4387.3  | 3.53    | 2.12  | High | 1    |   |
| FALSE | High | Master Prq Q98XU9   | N-alpha-ac   | 0     | 51.102  | 18 | 12 | 20  | 12 | 866  | 101.2  | 7.42  | 31.1   | 12 | cell differe; cytoplasm;         | catalytic ac | bi | P112569, F 80155   | ENSG000001 | NAAL5        | 4  |             |             |                       | 0         | 0.947 | 0.289154678 | 3.75        | 5658.8  | 5976.1  | 1.94    | 3     | High | 1    |   |
| FALSE | High | Master Prq P35080-2 | Isomorf mb   | 0     | 14.812  | 30 | 4  | 7   | 3  | 140  | 15.1   | 6.1   | 17.11  | 4  | cell                             |              |    |                    |            |              |    |             |             |                       |           |       |             |             |         |         |         |       |      |      |      |      |      |      |      |      |   |



|       |        |        |              |              |       |         |    |    |     |    |      |       |         |        |    |              |              |            |            |         |            |          |           |             |             |             |               |             |             |             |       |         |         |       |       |      |      |      |      |      |      |      |   |
|-------|--------|--------|--------------|--------------|-------|---------|----|----|-----|----|------|-------|---------|--------|----|--------------|--------------|------------|------------|---------|------------|----------|-----------|-------------|-------------|-------------|---------------|-------------|-------------|-------------|-------|---------|---------|-------|-------|------|------|------|------|------|------|------|---|
| FALSE | High   | Master | PrC Q9NR9F   | DNA polyn    | 0     | 9.235   | 18 | 3  | 3   | 3  | 147  | 16.8  | 4.74    | 2.67   | 3  | cell organ   | nucleus      | catalytic  | ai         | P00808  | 54107      | ENS00000 | POL3      | 9           | Purine met  | Gap-filling | 43            | 0.943       | 0.725496012 | 15.33       | 53    | 56.3    | 7.43    | 7.19  | High  | High | High | High | High | High | High | 1    |   |
| FALSE | High   | Master | PrC Q9UN52   | COP9 sign    | 0     | 35.793  | 22 | 6  | 8   | 6  | 423  | 47.8  | 6.65    | 24.88  | 6  | cell organ   | cytoplasm    | protein bi | ai         | P01399  | 8533       | ENS00000 | COP3      | 17          |             | Cargo reco  | 13            | 0.943       | 0.851913573 | 1.74        | 1334  | 1374.7  | 14.76   | 4.22  | High  | High | High | High | High | High | High | 1    |   |
| FALSE | High   | Master | PrC Q9UN52   | Talin-1 [O]  | 0     | 295.816 | 30 | 50 | 78  | 47 | 2541 | 269.6 | 6.07    | 213.94 | 50 | cell organ   | cell surface | protein bi | ai         | P00373  | 7094       | ENS00000 | TUN1      | 9           | Rap1 signa  | Integrin-m  | SEMA3A li     | 43          | 0.942       | 0.048374845 | 1.11  | 13001.7 | 13374.2 | 3.65  | 3.42  | High | 1 |
| FALSE | High   | Master | PrC Q9NZ74   | Zinc finger  | 0     | 11.484  | 6  | 3  | 4   | 3  | 707  | 78.5  | 4.87    | 9.23   | 3  | metabolic    | cytosol      | metal ion  | ai         | P00098  | 55596      | ENS00000 | ZCCHC     | 12          |             |             | 0             | 0.942       | 0.109451339 | 4.05        | 674   | 729.9   | 1.23    | 3.62  | High  | High | High | High | High | High | High | 1    |   |
| FALSE | High   | Master | PrC Q12894   | Interferon   | 0.003 | 2.875   | 3  | 1  | 1   | 1  | 506  | 54.8  | 7.94    | 3.34   | 1  | nucleus      | protein bi   | ai         | P04836     | 7866    | ENS00000   | IFR2     | 3         |             |             | 0           | 0.942         | 0.181340942 | 1.51        | 248.4       | 278.9 | 6.45    | 4.89    | High  | High  | High | High | High | High | High | 1    |      |   |
| FALSE | High   | Master | PrC P18621   | 60S riboso   | 0     | 99.348  | 57 | 12 | 47  | 11 | 184  | 21.4  | 10.17   | 96.23  | 12 | cell organ   | cytosol      | protein bi | ai         | P00337  | 6139       | ENS00000 | KPL17     | 18          | Ribosome    | Cytoplasm   | Peptide ch    | 34          | 0.942       | 0.187248976 | 4.13  | 14103   | 14702.6 | 6.17  | 5.55  | High | 1 |
| FALSE | High   | Master | PrC Q43175   | D-3-phosph   | 0     | 164.462 | 51 | 21 | 65  | 21 | 533  | 56.6  | 6.71    | 149.23 | 21 | metabolic    | cytosol      | catalytic  | ai         | P00389  | 76227      | ENS00000 | PGDH      | 9           | Glycine, se | Trans-sulf  | Serine bio    | 9           | 0.942       | 0.243136595 | 7.23  | 17389   | 18356.9 | 8     | 1.36  | High | 1 |
| FALSE | High   | Master | PrC P05141   | ADP/ATP i    | 0     | 116.820 | 50 | 19 | 62  | 8  | 298  | 32.8  | 9.69    | 107.77 | 19 | regulation   | membrane     | protein bi | ai         | P00153  | 292        | ENS00000 | SLC25A5   | X           | HTLV-I infe | Electron Tr | Nip-medi      | 15          | 0.942       | 0.24432548  | 2.49  | 5154.9  | 5469.8  | 9.75  | 4.64  | High | 1 |
| FALSE | Medium | Master | PrC Q60725   | protein-s-i  | 0.012 | 1.939   | 3  | 1  | 1   | 1  | 284  | 31.9  | 7.96    | 1.91   | 1  | cell organ   | endoplasm    | catalytic  | ai         | P04140  | 72343      | ENS00000 | ICMT      | 1           | Terpenoid   |             | Gamma cat     | 4           | 0.942       | 0.921533913 | 24.1  | 505.6   | 544.6   | 21.46 | 1.34  | High | 1 |
| FALSE | High   | Master | PrC Q15294   | UDP-N-ace    | 0     | 25.929  | 7  | 5  | 6   | 5  | 1046 | 116.9 | 6.7     | 18.85  | 5  | cell death   | cytoplasm    | catalytic  | ai         | P00515  | 18473      | ENS00000 | OGT       | X           | Other type  | Extracell   | HAT's acety   | 10          | 0.942       | 0.062460596 | 0.59  | 1875.2  | 2016    | 1.89  | 1.98  | High | 1 |
| FALSE | High   | Master | PrC P56945   | Breast can   | 0     | 31.504  | 13 | 6  | 7   | 6  | 870  | 93.3  | 5.67    | 20.08  | 6  | cell divisio | cytoplasm    | protein bi | ai         | P00018  | 17954      | ENS00000 | BCAR1     | 1           | Focal adhe  | Integrin-m  | pi30CAs li    | 29          | 0.941       | 0.073930245 | 3.51  | 1104.8  | 1219.5  | 5.76  | 7.54  | High | 1 |
| FALSE | High   | Master | PrC Q0DMV8   | heat shock   | 0     | 417.339 | 73 | 44 | 242 | 23 | 641  | 70    | 5.66    | 643.81 | 44 | cell organ   | cytoplasm    | catalytic  | ai         | P00012  | 17304; 330 | ENS00000 | HSPA18; H | 6; CHR_ HS  | Longevity + | Apoptosis   | AUF1 (thr     | 38          | 0.941       | 0.107537728 | 4.29  | 36993   | 38224.8 | 1.67  | 3.59  | High | 1 |
| FALSE | High   | Master | PrC Q9H2M9   | Rab3 GTPa    | 0     | 8.014   | 2  | 2  | 2   | 2  | 1393 | 155.9 | 5.62    | 5.74   | 2  | regulation   | cytoplasm    | enzyme re  | ai         | P014655 | 17582      | ENS00000 | RAB3GAP2  | 1           |             |             | COP1-inde     | 7           | 0.941       | 0.201543886 | 7.4   | 423.5   | 431.8   | 2.4   | 6.63  | High | 1 |
| FALSE | High   | Master | PrC P53999   | Activated f  | 0     | 151.962 | 65 | 13 | 63  | 13 | 127  | 14.4  | 9.6     | 229.65 | 13 | cell organ   | nucleus      | catalytic  | ai         | P02229  | 10923      | ENS00000 | SUB1      | 5           |             |             |               | 0           | 0.941       | 0.301813001 | 10.15 | 30734.2 | 30514   | 18.28 | 10.34 | High | 1 |
| FALSE | High   | Master | PrC Q9UGV2   | protein NC   | 0     | 19.556  | 18 | 4  | 4   | 4  | 375  | 41.4  | 5.31    | 13.1   | 4  | cell differe | cytoplasm    |            | ai         | P00561  | 175446     | ENS00000 | NRD63     | 10          |             |             |               | 0           | 0.941       | 0.537668586 | 7.85  | 402.1   | 419.5   | 43.37 | 2.08  | High | 1 |
| FALSE | High   | Master | PrC Q9UKK3   | Poly (ADP    | 0     | 11.023  | 1  | 2  | 2   | 2  | 1724 | 192.5 | 5.66    | 5.12   | 2  | cell death   | cytoplasm    | catalytic  | ai         | P00092  | 17143      | ENS00000 | PARP4     | 23          | Apoptosis;  | NAD+ bio    | Nicotinam     | 8           | 0.941       | 0.602453745 | 78.16 | 399     | 424.2   | 76.05 | 20.79 | High | 1 |
| FALSE | Low    | Master | PrC Q60293   | Zinc finger  | 0.054 | 1.164   | 1  | 1  | 1   | 1  | 1989 | 226.2 | 8.13    | 0      | 1  | metabolic    | nucleus      | metal ion  | ai         | P08317  | 17196441   | ENS00000 | ZFC3H1    | 12          |             |             |               | 0           | 0.941       | 0.632254374 | 25.69 | 167.4   | 177.9   | 39.17 | 12.76 | High | 1 |
| FALSE | High   | Master | PrC Q9CYR8   | Pyrolyne-s   | 0     | 6.051   | 7  | 1  | 1   | 1  | 274  | 28.6  | 7.72    | 4.95   | 1  | metabolic    | cytoplasm    | catalytic  | ai         | P03807  | 1765263    | ENS00000 | PGYR1     | 8; CHR_ HS  | Biosynthes  | Urea cycle  | Amino acid    | 7           | 0.941       | 0.76322369  | 24.53 | 152.9   | 162.8   | 7.91  | 13.45 | High | 1 |
| FALSE | High   | Master | PrC P78318   | Immunoglob   | 0     | 6.908   | 8  | 2  | 2   | 2  | 339  | 39.2  | 5.38    | 5.77   | 2  | regulation   | cytoplasm    | enzyme re  | ai         | P04177  | 3476       | ENS00000 | IGBP1     | X           |             |             |               | 0           | 0.941       | 0.768498497 | 4.29  | 624.3   | 663.7   | 20.81 | 2.19  | High | 1 |
| FALSE | High   | Master | PrC Q07096   | Sorbitol de  | 0     | 24.13   | 22 | 6  | 6   | 6  | 357  | 38.3  | 7.97    | 13.19  | 6  | cellular cor | cytosol      | catalytic  | ai         | P01007  | 176652     | ENS00000 | SORD      | 15          | Pentose ara | Polyol Pat  | Catabolism    | 9           | 0.941       | 0.862709609 | 8.16  | 852.7   | 906.1   | 15.48 | 4.18  | High | 1 |
| FALSE | High   | Master | PrC Q9H3U1   | Protein un   | 0     | 44.55   | 11 | 9  | 12  | 8  | 944  | 103   | 6.07    | 29.67  | 9  | cell differe | cytoplasm    | protein bi | ai         | P00515  | 175588     | ENS00000 | UNC5A     | 15          |             |             |               | 0           | 0.94        | 0.105511831 | 1.37  | 1046.5  | 1113.2  | 1.03  | 2.21  | High | 1 |
| FALSE | High   | Master | PrC Q13045-1 | protein fil  | 0     | 32.506  | 7  | 9  | 16  | 9  | 1269 | 144.7 | 6.05    | 25.27  | 9  | cell organ   | cytoplasm    | protein bi | ai         | P00626  | 172314     | ENS00000 | FIL1      | 17; CHR_ HS |             |             |               | 0           | 0.94        | 0.170855745 | 6.44  | 2301.7  | 2417.5  | 3.7   | 4     | High | 1 |
| FALSE | High   | Master | PrC P40763   | Signal tran  | 0     | 90.242  | 31 | 15 | 21  | 5  | 770  | 88    | 6.3     | 50.23  | 15 | cell differe | cytoplasm    | DNA bindi  | ai         | P00017  | 176774     | ENS00000 | STAT3     | 17          | Jak-STAT si | IL-5 Signa  | Interleukin   | 106         | 0.94        | 0.185426579 | 4.01  | 3930.6  | 4068.3  | 13.51 | 4.36  | High | 1 |
| FALSE | High   | Master | PrC Q95400   | CD2 antige   | 0     | 29.497  | 23 | 6  | 7   | 6  | 341  | 37.6  | 4.61    | 17.34  | 6  | cell organ   | cytoplasm    | protein bi | ai         | P00213  | 10421      | ENS00000 | CD2BP2    | 16          | mRNA Pro    | mRNA Spli   |               | 5           | 0.94        | 0.217311498 | 2.15  | 2353.9  | 2756.1  | 9.21  | 6.88  | High | 1 |
| FALSE | High   | Master | PrC Q75821   | Eukaryotic   | 0     | 30.766  | 21 | 7  | 13  | 7  | 320  | 35.6  | 6.13    | 41.93  | 7  | metabolic    | cytoplasm    | protein bi | ai         | P00076  | 178666     | ENS00000 | EIF3G     | 19          | RNA trans   | Translation | Formation     | 13          | 0.94        | 0.290323371 | 0.31  | 3673.4  | 4378.8  | 18.61 | 10.66 | High | 1 |
| FALSE | High   | Master | PrC P52701   | DNA mism     | 0     | 110.432 | 22 | 22 | 26  | 22 | 1360 | 152.7 | 6.9     | 67.24  | 22 | cell organ   | chromoso     | catalytic  | ai         | P00488  | 172956     | ENS00000 | MSH6      | 2           | Colorectal  | Signaling   | P Defective f | 14          | 0.94        | 0.300638552 | 10.74 | 6726.6  | 6891.3  | 3.85  | 7.25  | High | 1 |
| FALSE | High   | Master | PrC Q9B2G1   | Ras-relate   | 0     | 15.052  | 5  | 1  | 3   | 1  | 259  | 29    | 7.88    | 8.72   | 1  | cell organ   | cytoplasm    | catalytic  | ai         | P00025  | 178371     | ENS00000 | RAB34     | 17          |             |             |               | 3           | 0.94        | 0.343302867 | 12.39 | 258.6   | 263.9   | 9.04  | 4.16  | High | 1 |
| FALSE | High   | Master | PrC P33992   | DNA replic   | 0     | 72.745  | 27 | 16 | 20  | 16 | 734  | 82.2  | 83.7    | 42.58  | 16 | cell divisio | membrane     | catalytic  | ai         | P00493  | 174174     | ENS00000 | PCNA      | 22          | Cell cycle; | Cell Cycle  | M/G1 Tran     | 25          | 0.94        | 0.360658616 | 8.76  | 5877.3  | 5904.4  | 5.96  | 7.68  | High | 1 |
| FALSE | High   | Master | PrC Q9C97C   | Isocitronin  | 0.001 | 4.286   | 5  | 1  | 1   | 1  | 298  | 32.2  | 7.39    | 4.41   | 1  | metabolic    | cytoplasm    | catalytic  | ai         | P00857  | 51015      | ENS00000 | ISOC1     | 1           |             |             |               | 0           | 0.94        | 0.418521697 | 15.72 | 599.1   | 594.9   | 11.96 | 5.72  | High | 1 |
| FALSE | High   | Master | PrC P62899   | 60S riboso   | 0     | 31.889  | 44 | 9  | 26  | 9  | 125  | 14.5  | 10.54   | 29.77  | 9  | cell organ   | cytosol      | me         | protein bi | P01198  | 6150       | ENS00000 | RPL31     | 2           | Ribosome    | Cytoplasm   | Peptide ch    | 34          | 0.94        | 0.473179998 | 4.41  | 7216.6  | 7810.2  | 1.06  | 7.56  | High | 1 |
| FALSE | High   | Master | PrC Q9NUQ2   | 1-acyl-sn-g  | 0     | 7.761   | 6  | 1  | 1   | 1  | 364  | 42    | 9.1     | 4.68   | 1  | cell differe | endoplasm    | catalytic  | ai         | P01553  | 55326      | ENS00000 | AGPAT5    | 8           | Glycerolip  | Triacylgly  | Synthesis c   | 10          | 0.94        | 0.605054401 | 5.17  | 92.2    | 99.1    | 30.43 | 0.64  | High | 1 |
| FALSE | High   | Master | PrC P49755   | Transmem     | 0     | 34.04   | 31 | 7  | 11  | 7  | 219  | 25    | 7.44    | 26.91  | 7  | cell organ   | endoplasm    | protein bi | ai         | P01105  | 10972      | ENS00000 | TMED10    | 14          | mRNA Pro    | COP1-depe   |               | 14          | 0.94        | 0.605575582 | 25.03 | 3763.6  | 3848.4  | 18.59 | 4.91  | High | 1 |
| FALSE | High   | Master | PrC P26599   | Polypyrim    | 0     | 199.942 | 62 | 21 | 63  | 21 | 531  | 57.2  | 9.17    | 222.91 | 21 | metabolic    | membrane     | protein bi | ai         | P00076  | 175725     | ENS00000 | PTBP1     | 19          |             |             |               | 11          | 0.94        | 0.683369892 | 7.05  | 12136.3 | 12911.4 | 4.31  | 6.04  | High | 1 |
| FALSE | High   | Master | PrC Q61602   | La-related   | 0     | 43.733  | 10 | 9  | 16  | 9  | 1096 | 123.4 | 8.82    | 39.45  | 9  | cell profile | cytoplasm    | protein bi | ai         | P05383  | 23367      | ENS00000 | LARP1     | 1           |             |             |               | 0           | 0.94        | 0.595093229 | 16.06 | 3988.2  | 4243.1  | 12.88 | 6.58  | High | 1 |
| FALSE | High   | Master | PrC Q16643   | drebilin [O] | 0     | 67.143  | 21 | 10 | 20  | 10 | 649  | 71.4  | 4.55    | 59.79  | 10 | cell commu   | cytoplasm    | protein bi | ai         | P00241  | 1627       | ENS00000 | DBN1      | 5           |             |             |               | 0           | 0.94        | 0.960466835 | 11.53 | 2571.3  | 2736.7  | 11.04 | 7.52  | High | 1 |
| FALSE | High   | Master | PrC P62851   | 40S riboso   | 0     | 44.222  | 60 | 12 | 37  | 12 | 125  | 13.7  | 10.11</ |        |    |              |              |            |            |         |            |          |           |             |             |             |               |             |             |             |       |         |         |       |       |      |      |      |      |      |      |      |   |

|       |      |                     |              |       |         |    |    |     |    |      |       |       |        |    |                                       |                 |           |            |    |  |  |  |                                     |    |       |             |             |         |         |       |       |      |      |      |      |      |      |      |      |   |
|-------|------|---------------------|--------------|-------|---------|----|----|-----|----|------|-------|-------|--------|----|---------------------------------------|-----------------|-----------|------------|----|--|--|--|-------------------------------------|----|-------|-------------|-------------|---------|---------|-------|-------|------|------|------|------|------|------|------|------|---|
| FALSE | High | Master Prq Q00341-1 | Vigilin [OS] | 0     | 121.959 | 28 | 29 | 47  | 29 | 1268 | 141.4 | 6.87  | 93.17  | 29 | metabolic; cytoplasm; protein bi      | P00013, F 3069  |           | HDLBP      | 2  |  |  |  | HDL cleave                          | 4  | 0.935 | 0.567304003 | 1.18        | 9054    | 9538.6  | 6.73  | 1.57  | High | 1    |   |
| FALSE | Low  | Master Prq Q06566   | thioridol cr | 0.063 | 1.098   | 2  | 1  | 1   | 1  | 551  | 62    | 5.55  | 1.76   | 1  | transport; endoplasm; transporte      | P05834, F 23155 | ENSG00000 | CLCC1      | 1  |  |  |  |                                     |    | 0     | 0.935       | 0.616962064 | 11.98   | 591.5   | 637.5 | 9.5   | 4.38 | High | 1 |
| FALSE | High | Master Prq Q00031   | Chydori ct   | 0.003 | 3.386   | 5  | 1  | 1   | 1  | 241  | 287   | 9.88  | 3.11   | 1  | metabolic; nucleus; protein bi        | 29080           | ENSG00000 | CCDC59     | 12 |  |  |  | Surfactant                          | 6  | 0.935 | 0.745934238 | 0.88        | 681.6   | 722.7   | 13.39 | 5.48  | High | 1    |   |
| FALSE | High | Master Prq P49591   | Serine-4Rf   | 0     | 34.868  | 22 | 10 | 11  | 10 | 514  | 587   | 6.43  | 20.37  | 10 | metabolic; cytoplasm; catalytic a     | P00587, F 6301  | ENSG00000 | SARS       | 1  |  |  |  | Selenocyst                          | 9  | 0.935 | 0.810219399 | 17.08       | 5139.1  | 5273.4  | 12.52 | 9.27  | High | 1    |   |
| FALSE | High | Master Prq Q08123   | IRNA Cytic   | 0     | 180.057 | 43 | 29 | 54  | 29 | 767  | 86.4  | 6.77  | 130.1  | 29 | cell division; cytoplasm; catalytic a | P01189, F 54888 | ENSG00000 | USN2       | 5  |  |  |  | tRNA mod                            | 3  | 0.935 | 0.864552847 | 2.34        | 15231.9 | 15615.7 | 8.27  | 3.59  | High | 1    |   |
| FALSE | High | Master Prq Q09501   | ESF1 homc    | 0     | 15.426  | 6  | 5  | 5   | 5  | 851  | 98.7  | 5.11  | 6.28   | 5  | metabolic; nucleus; RNA bindi         | P08159          | ENSG00000 | ESF1       | 20 |  |  |  |                                     | 0  | 0.935 | 0.904826744 | 38.75       | 56.4    | 62.9    | 30.63 | 13.04 | High | 1    |   |
| FALSE | High | Master Prq Q096C4   | PDZ and U    | 0     | 30.364  | 17 | 6  | 8   | 6  | 596  | 63.9  | 8.21  | 27.51  | 6  | cell growth; cytoplasm; metal ion     | P08412, F 10611 | ENSG00000 | PDMS       | 4  |  |  |  | Neurinin                            | 3  | 0.935 | 0.944477743 | 19.49       | 1231.6  | 1235.8  | 15.28 | 13.84 | High | 1    |   |
| FALSE | High | Master Prq P04075   | fructose-bi  | 0     | 334.226 | 85 | 31 | 217 | 25 | 364  | 39.4  | 8.09  | 634.7  | 31 | cell organ; cytoplasm; catalytic a    | P00274          | ENSG00000 | ALDOA      | 16 |  |  |  | Glycolysis; Glycolysis; Platelet de | 21 | 0.934 | 0.129094909 | 0.59        | 56668   | 62412.6 | 6.2   | 2.48  | High | 1    |   |
| FALSE | High | Master Prq P05067-1 | Amyloid-b    | 0     | 16.227  | 4  | 3  | 3   | 3  | 770  | 86.9  | 4.82  | 2.48   | 3  | cell comm; cell surface; DNA bindi    | P00014, F 351   | ENSG00000 | APP        | 21 |  |  |  | Serotonerg Alzheimer's Post-trans   | 69 | 0.934 | 0.129676982 | 6.64        | 337.5   | 382.6   | 10.49 | 6.84  | High | 1    |   |
| FALSE | High | Master Prq Q16706   | Alpha-mar    | 0     | 12.276  | 2  | 2  | 4   | 2  | 1144 | 131.1 | 7.58  | 8.93   | 2  | cell organ; Golgi/mer; catalytic a    | P01074, F 4124  | ENSG00000 | MAN2A1     | 5  |  |  |  | N-Glycan bi                         | 12 | 0.934 | 0.394798578 | 14.32       | 1213.2  | 1425.2  | 16.57 | 8.9   | High | 1    |   |
| FALSE | High | Master Prq Q93062-1 | RNA-bindi    | 0     | 8.718   | 18 | 2  | 2   | 2  | 196  | 21.8  | 8.07  | 6.96   | 2  | metabolic; cytoplasm; protein bi      | P00076, F 11030 | ENSG00000 | RBPM5      | 8  |  |  |  | Exercise-in                         | 1  | 0.934 | 0.45744637  | 0.17        | 138.7   | 148.5   | 6.89  | 1.02  | High | 1    |   |
| FALSE | High | Master Prq Q9UHA4   | regulator c  | 0     | 9.5     | 23 | 1  | 1   | 1  | 124  | 13.6  | 7.34  | 6.31   | 1  | metabolic; endosome; enzyme re        | P08923          | ENSG00000 | LAMTOR3    | 4  |  |  |  | MAPK sign                           | 28 | 0.934 | 0.520488906 | 23.27       | 306     | 327.6   | 11.11 | 10.1  | High | 1    |   |
| FALSE | High | Master Prq Q13309-1 | S-phase kin  | 0     | 10.294  | 11 | 2  | 2   | 2  | 424  | 47.7  | 7.11  | 7.91   | 2  | cell comm; cytoplasm; catalytic a     | P00646, F 6502  | ENSG00000 | SKP2       | 5  |  |  |  | Small cell i                        | 39 | 0.934 | 0.665259911 | 14.21       | 109.2   | 116.9   | 2.67  | 11.48 | High | 1    |   |
| FALSE | High | Master Prq Q9Y6M5   | zinc transp  | 0     | 11.994  | 9  | 4  | 5   | 4  | 507  | 55.3  | 6.48  | 8.54   | 4  | cellular ho; cytoplasm; protein bi    | P01545          | ENSG00000 | SLC30A1    | 1  |  |  |  | Mineral ab                          | 8  | 0.934 | 0.861914201 | 7.78        | 427     | 457     | 15.51 | 4.2   | High | 1    |   |
| FALSE | High | Master Prq Q15286   | Ras-relate   | 0     | 24.236  | 22 | 5  | 13  | 4  | 201  | 23    | 8.29  | 28.26  | 5  | cell organ; cytosol;eni; catalytic a  | P00006, F 11021 | ENSG00000 | RAB35      | 12 |  |  |  | Endocytosi                          | 9  | 0.933 | 0.114564949 | 2.47        | 4087    | 4454.5  | 5.76  | 2.54  | High | 1    |   |
| FALSE | High | Master Prq Q075879  | Glutamyl-L   | 0     | 16.366  | 7  | 2  | 2   | 2  | 557  | 61.8  | 8.63  | 6.24   | 2  | cell organ; mitochondr; catalytic a   | P02637, F 5188  | ENSG00000 | PET112; G  | 4  |  |  |  | Metabolic                           | 2  | 0.933 | 0.28264506  | 6.41        | 70.7    | 75.8    | 8.92  | 2.36  | High | 1    |   |
| FALSE | High | Master Prq Q8NAV1-1 | Pre-mRNA     | 0     | 8.172   | 7  | 2  | 2   | 2  | 312  | 37.5  | 9.96  | 2.69   | 2  | cell organ; membrane; protein bi      | P03371          | ENSG00000 | PRPF38A    | 11 |  |  |  | Spliceosom                          | 6  | 0.933 | 0.305469563 | 11.79       | 1150    | 1247.2  | 4.74  | 6.35  | High | 1    |   |
| FALSE | High | Master Prq P05067-1 | Zinc finger  | 0.001 | 4.249   | 3  | 1  | 1   | 1  | 310  | 34.1  | 8.07  | 3.17   | 1  | regulation; Golgi/mer; DNA bindi      | 7542            | ENSG00000 | ZFP11      | 11 |  |  |  |                                     | 0  | 0.933 | 0.35198118  | 12.5        | 504.8   | 540.9   | 26.87 | 5.39  | High | 1    |   |
| FALSE | High | Master Prq P50454   | Serpin H1    | 0     | 86.937  | 38 | 11 | 29  | 11 | 418  | 46.4  | 8.69  | 76.13  | 11 | cell organ; cytoplasm; enzyme re      | P00079          | ENSG00000 | SERPINH1   | 14 |  |  |  | Endothcon; Collagen bi              | 4  | 0.933 | 0.376110204 | 11.29       | 6833.6  | 7286.9  | 4.56  | 6.04  | High | 1    |   |
| FALSE | High | Master Prq Q096C4   | selenoprot   | 0     | 12.426  | 20 | 2  | 2   | 2  | 189  | 21.2  | 9.7   | 2.09   | 2  | cellular ho; cytoplasm; antioxidant   | P06936          | ENSG00000 | VIMF; SELI | 15 |  |  |  | Protein prc                         | 7  | 0.933 | 0.407190928 | 4.47        | 1277.2  | 1368.9  | 10    | 2.89  | High | 1    |   |
| FALSE | High | Master Prq Q9H875   | PKR-inter    | 0.003 | 3.302   | 5  | 1  | 1   | 1  | 184  | 21    | 9.79  | 2.53   | 1  | metabolic; nucleus; enzyme re         | P06658          | ENSG00000 | PKRIP1     | 7  |  |  |  |                                     | 0  | 0.933 | 0.47467105  | 0.27        | 606.1   | 598.9   | 6.71  | 8.89  | High | 1    |   |
| FALSE | High | Master Prq P46199   | Translatior  | 0     | 5.314   | 2  | 1  | 1   | 1  | 727  | 81.3  | 7.15  | 2.3    | 1  | cell organ; mitochondr; catalytic a   | P00009, F 4528  | ENSG00000 | MTF2       | 2  |  |  |  | Mitochondr                          | 4  | 0.933 | 0.620597851 | 1.95        | 564.8   | 566.3   | 4.36  | 6.92  | High | 1    |   |
| FALSE | High | Master Prq Q5H9R7-1 | Serine/thr   | 0     | 13.015  | 5  | 4  | 4   | 4  | 873  | 97.6  | 4.6   | 6.13   | 4  | cell organ; cytoplasm; protein bi     | P04499          | ENSG00000 | PPR361     | 11 |  |  |  | COPII (Coa                          | 8  | 0.933 | 0.708304368 | 0           | 74      | 75.9    | 13.25 | 7.7   | High | 1    |   |
| FALSE | High | Master Prq P00870   | Vimentin j   | 0     | 330.729 | 82 | 46 | 210 | 42 | 466  | 53.6  | 5.12  | 497.27 | 46 | cell differe; cytoplasm; protein bi   | P00038, F 7431  | ENSG00000 |            | 20 |  |  |  | MicroRNA; Allograft R; interleukin  | 20 | 0.933 | 0.746657982 | 17.57       | 52803.7 | 56611.2 | 10.69 | 5.99  | High | 1    |   |
| FALSE | High | Master Prq Q69YN2-1 | CWF19-like   | 0     | 18.798  | 11 | 4  | 4   | 4  | 538  | 60.6  | 7.24  | 9.95   | 4  | catalytic a                           | P04676, F 55280 | ENSG00000 | CWF19L1    | 10 |  |  |  |                                     | 0  | 0.933 | 0.760093238 | 10.97       | 617.8   | 662.2   | 21.67 | 4.75  | High | 1    |   |
| FALSE | High | Master Prq Q15018   | BRISC com    | 0     | 15.96   | 10 | 3  | 3   | 3  | 415  | 46.9  | 6.21  | 9.24   | 3  | cell divisio; cytoplasm; protein bi   | P00621          | ENSG00000 | FAM1758; U | 10 |  |  |  | Metallopro                          | 4  | 0.933 | 0.935830131 | 50.97       | 596.4   | 639.3   | 30.59 | 16.48 | High | 1    |   |
| FALSE | High | Master Prq P62314   | Small nucle  | 0     | 8.722   | 17 | 1  | 2   | 1  | 119  | 13.3  | 11.56 | 8.09   | 1  | metabolic; cytoplasm; protein bi      | P01423          | ENSG00000 | SNRPD1     | 18 |  |  |  | Spliceosom; mRNA Proc; snRNP Ass    | 10 | 0.932 | 0.051177321 | 0.66        | 262.1   | 271.8   | 2.45  | 3.18  | High | 1    |   |
| FALSE | High | Master Prq Q00701   | UDP-glucos   | 0     | 136.99  | 52 | 20 | 44  | 20 | 494  | 55    | 7.12  | 129.19 | 20 | metabolic; cytosol;nu; catalytic a    | P00884, F 7358  | ENSG00000 | UGDH       | 4  |  |  |  | Ascorbate; Glucuronid Form          | 10 | 0.932 | 0.055096237 | 3.07        | 12779.4 | 13503.6 | 1.01  | 3.29  | High | 1    |   |
| FALSE | High | Master Prq P61513   | 60S riboso   | 0     | 30.007  | 47 | 5  | 20  | 5  | 92   | 10.3  | 10.43 | 49.16  | 5  | cell organ; cytosol;nu; metal ion     | P01780          | ENSG00000 | RLP37A     | 2  |  |  |  | Ribosome; Cytoplasm; Peptide ch     | 34 | 0.932 | 0.058820166 | 1.88        | 12059.4 | 13232   | 2.63  | 2.09  | High | 1    |   |
| FALSE | High | Master Prq P07187   | T-complex    | 0     | 175.394 | 53 | 23 | 55  | 23 | 556  | 60.3  | 6.11  | 147.6  | 23 | cell organ; cytoplasm; nucleotide     | P00018          | ENSG00000 | TCPI       | 6  |  |  |  | BBSome-r                            | 18 | 0.932 | 0.900514049 | 2.39        | 13456.7 | 14898.8 | 3.99  | 2.99  | High | 1    |   |
| FALSE | High | Master Prq P38606   | V-profilin p | 0     | 10.527  | 40 | 17 | 28  | 17 | 617  | 68.3  | 5.52  | 90.76  | 17 | cellular ho; cytosol;mer; catalytic a | P00006, F 523   | ENSG00000 | ATP6V1A    | 3  |  |  |  | Synaptic ve                         | 20 | 0.932 | 0.111963138 | 3.56        | 7215.7  | 7852.9  | 3.99  | 2.35  | High | 1    |   |
| FALSE | High | Master Prq Q09471-1 | Prefoldin s  | 0     | 38.526  | 59 | 9  | 14  | 9  | 154  | 17.3  | 6.33  | 39.71  | 9  | metabolic; cytoplasm; protein bi      | P02996          | ENSG00000 | PFMS       | 12 |  |  |  | Prefoldin r                         | 5  | 0.932 | 0.172829998 | 3.62        | 3151.2  | 3379.8  | 2.67  | 6.28  | High | 1    |   |
| FALSE | High | Master Prq Q9H832   | Ubiquitin-n  | 0     | 20.205  | 8  | 3  | 9   | 3  | 354  | 38.2  | 5.62  | 20.22  | 3  | cell death; cytoplasm; catalytic a    | P00179, F 65264 | ENSG00000 | UBE2Z      | 7  |  |  |  | Ubiquitin n                         | 9  | 0.932 | 0.427343266 | 18.43       | 815.4   | 899.9   | 25.33 | 11.46 | High | 1    |   |
| FALSE | High | Master Prq Q9UH65   | Switch-ass   | 0     | 23.767  | 12 | 7  | 10  | 7  | 585  | 69    | 5.87  | 13.49  | 7  | cell organ; cytoplasm; DNA bindi      | P03075, F 23075 | ENSG00000 | SWAP70     | 11 |  |  |  |                                     | 0  | 0.932 | 0.432807477 | 9.66        | 3355.6  | 3600.1  | 1.45  | 7.9   | High | 1    |   |
| FALSE | High | Master Prq Q9NWU2   | Glucose-in   | 0     | 9.801   | 10 | 1  | 2   | 1  | 228  | 26.7  | 4.97  | 9.25   | 1  | nucleus; protein bi                   | P08513, F 54994 | ENSG00000 | GID8       | 20 |  |  |  |                                     | 0  | 0.932 | 0.568341408 | 46.84       | 349.7   | 451.5   | 34.05 | 31.81 | High | 1    |   |
| FALSE | High | Master Prq Q00933   | Putative RI  | 0     | 49.479  | 20 | 8  | 24  | 5  | 392  | 46.5  | 10.01 | 67.29  | 8  | cell organ; cytosol;sp; protein bi    | P01394          | ENSG00000 | LYC12      | 1  |  |  |  |                                     | 0  | 0.932 | 0.687698415 | 4.97        | 3730.3  | 4053.2  | 13.01 | 3.11  | High | 1    |   |
| FALSE | High | Master Prq Q075165  | Dnal homc    | 0     | 8.117   | 1  | 2  | 2   | 2  | 2243 | 254.3 | 6.74  | 4.87   | 2  | cell differe; cytosol;eni; protein bi | P00226, F 23317 | ENSG00000 | DNAIC13    | 3  |  |  |  | Neutrophil                          | 3  | 0.932 | 0.894097057 | 18.28       | 200.2   | 214.9   | 17.39 | 9.9   | High | 1    |   |
| FALSE | High | Master Prq Q57457-1 | e3 ubiquiti  | 0     | 108.872 | 6  | 20 | 24  | 20 | 5183 | 57.3  | 6.04  | 58.7   | 20 | metabolic; cytoplasm; catalytic a     | P00207, F 23352 | ENSG00000 | UBRA       | 1  |  |  |  | Viral cardir                        | 7  | 0.932 | 0.92637052  | 10.81       |         |         |       |       |      |      |      |      |      |      |      |      |   |

|       |        |        |              |                                    |       |         |    |    |     |    |      |       |       |        |    |                 |                                 |                  |                           |    |                           |                                      |    |       |              |       |         |         |       |       |      |      |      |      |      |      |      |      |   |
|-------|--------|--------|--------------|------------------------------------|-------|---------|----|----|-----|----|------|-------|-------|--------|----|-----------------|---------------------------------|------------------|---------------------------|----|---------------------------|--------------------------------------|----|-------|--------------|-------|---------|---------|-------|-------|------|------|------|------|------|------|------|------|---|
| FALSE | High   | Master | PrC Q9NSD9   | Phenylalanine                      | 0     | 18.968  | 10 | 6  | 8   | 6  | 589  | 66.1  | 6.84  | 12.75  | 6  | cell organ      | cytoplasm; catalytic ac         | P03483, F 10056  | ENSG000001 FARS8          | 2  | Aminoacyl-tRNA synthetase | Amino Acyl Cytosolic tRNA synthetase | 6  | 0.927 | 0.705544246  | 39.19 | 1421.5  | 1533    | 17.69 | 14.59 | High | 1 |
| FALSE | High   | Master | PrC P61313-1 | 60S ribosomal protein L13          | 0     | 65.517  | 10 | 11 | 28  | 11 | 204  | 24.1  | 11.62 | 53.14  | 11 | cell organ      | cytosol; membrane protein       | P00827, F 6138   | ENSG000001 RPL15          | 3  | Ribosome                  | Cytoplasmic Peptide chain            | 34 | 0.927 | 0.912333629  | 1.66  | 8781.3  | 9412    | 5.08  | 7.6   | High | 1 |
| FALSE | High   | Master | PrC Q06787   | synaptophysin                      | 0     | 21.653  | 11 | 6  | 8   | 5  | 632  | 71.1  | 7.42  | 29.88  | 6  | metabolic       | chromosome; protein             | P00013, F 2332   | ENSG000001 FMRL1          | X  | RNA transport             | Serotonin                            | 2  | 0.927 | 0.948756472  | 11.21 | 1993    | 2150.1  | 19.16 | 1.3   | High | 1 |
| FALSE | High   | Master | PrC Q00221   | NF-kappa-B                         | 0     | 4.794   | 6  | 1  | 1   | 1  | 500  | 52.8  | 6.68  | 4.41   | 1  | regulation      | cytoplasm; protein              | P00023, F 4794   | ENSG000001 NFkBIE         | 6  | B cell receptor           | TNF alpha Activation                 | 14 | 0.926 | 0.009700853  | 1.04  | 63.1    | 67.1    | 4.77  | 4.83  | High | 1 |
| FALSE | High   | Master | PrC Q00483   | Cytochrome c                       | 0     | 10.623  | 46 | 4  | 9   | 4  | 81   | 9.4   | 9.38  | 10.01  | 4  | metabolic       | membrane; catalytic ac          | P06522, F 4697   | ENSG000001 NDUF4A         | 7  | Parkinson's disease       | Electron Transport                   | 17 | 0.926 | 0.015876867  | 1.83  | 3277.7  | 3612.1  | 9.06  | 9.07  | High | 1 |
| FALSE | High   | Master | PrC Q75153   | Clustring                          | 0     | 43.827  | 11 | 10 | 13  | 10 | 1309 | 146.6 | 6.13  | 32.45  | 10 | cell organ      | cytoplasm; protein              | P112807, F 23277 | ENSG000001 CLUH; KIAA1127 | 11 | Translational             |                                      | 1  | 0.926 | 0.136478175  | 7.08  | 4640.5  | 4956.8  | 1.49  | 4.35  | High | 1 |
| FALSE | High   | Master | PrC P62861   | 40S ribosomal protein S19          | 0     | 10.724  | 31 | 2  | 8   | 2  | 59   | 6.6   | 12.15 | 8.42   | 2  | cell organ      | cytosol; ribosomal              | P04758, F 2197   | ENSG000001 RPS19          | 17 | Ribosome                  | Cytoplasmic Peptide chain            | 37 | 0.926 | 0.170557844  | 8.55  | 846.9   | 915.7   | 3.77  | 3.89  | High | 1 |
| FALSE | High   | Master | PrC Q95140   | Mitofusin-1                        | 0     | 6.975   | 3  | 2  | 3   | 2  | 757  | 86.3  | 6.98  | 3.16   | 2  | cell common     | cytoskeleton; catalytic ac      | P000350, F 9927  | ENSG000001 MFN2           | 1  | NOD-like receptor         | Factors involved in                  | 5  | 0.926 | 0.263589698  | 8.17  | 435     | 485.6   | 14.16 | 5.32  | High | 1 |
| FALSE | High   | Master | PrC Q96K91   | exocyst complex subunit 1          | 0     | 6.945   | 4  | 2  | 3   | 2  | 924  | 10.4  | 6.9   | 7.11   | 2  | cell organ      | cytosol; membrane protein       | P01813, F 55770  | ENSG000001 EXOC2          | 6  | Ras signaling             | Raila down Translocation             | 12 | 0.926 | 0.517300965  | 18.32 | 315     | 340.3   | 4.27  | 9.93  | High | 1 |
| FALSE | High   | Master | PrC Q96K91   | Histidine H1                       | 0     | 54.729  | 79 | 8  | 20  | 8  | 126  | 13.8  | 6.95  | 48.73  | 8  | cell death      | cytoplasm; catalytic ac         | P01230, F 3094   | ENSG000001 HNT7           | 5  |                           |                                      | 0  | 0.926 | 0.662058696  | 9.16  | 4944.4  | 5430.1  | 32.73 | 0.98  | High | 1 |
| FALSE | High   | Master | PrC Q99661-1 | Kinesin-like                       | 0     | 18.069  | 7  | 4  | 4   | 3  | 725  | 81.3  | 7.83  | 3.48   | 4  | cell division   | chromosome; catalytic ac        | P00225, F 11004  | ENSG000001 KIF2C          | 1  | Regulation                | COPII-dependent                      | 28 | 0.926 | 0.759134525  | 8     | 126.2   | 136.3   | 13.18 | 14.62 | High | 1 |
| FALSE | High   | Master | PrC P17066   | Heat shock protein 70              | 0     | 85.763  | 21 | 12 | 66  | 1  | 643  | 71    | 6.14  | 135.69 | 12 | cell organ      | cytoplasm; catalytic ac         | P00012, F 3310   | ENSG000001 HSPA6          | 6  | Estrogen signaling        | Neurotrophin                         | 20 | 0.926 | 0.802018115  | 72.11 | 65.5    | 68.1    | 46.31 | 40.04 | High | 1 |
| FALSE | High   | Master | PrC P11172   | uridine 5'-phosphate decarboxylase | 0     | 24.906  | 17 | 6  | 6   | 6  | 480  | 52.2  | 7.24  | 15.53  | 6  | metabolic       | cytoplasm; catalytic ac         | P00156, F 7372   | ENSG000001 UMP5           | 3  | Pyrimidine                | Fluoropyrimidine                     | 8  | 0.925 | 0.028391724  | 2.35  | 1155.4  | 1249    | 10.72 | 8.18  | High | 1 |
| FALSE | High   | Master | PrC P08237   | ATP-dependent                      | 0     | 96.69   | 33 | 17 | 27  | 14 | 780  | 85.1  | 7.99  | 65.71  | 17 | cell organ      | cytoplasm; catalytic ac         | P00365, F 5213   | ENSG000001 PFKFB3         | 12 | Central carbon metabolism | Glycolysis                           | 16 | 0.925 | 0.148689739  | 1.19  | 5521.8  | 6001.2  | 3.38  | 6.23  | High | 1 |
| FALSE | High   | Master | PrC Q95363   | phenylalanine                      | 0     | 10.716  | 8  | 3  | 3   | 3  | 451  | 52.3  | 7.46  | 19.9   | 3  | metabolic       | cytoplasm; catalytic ac         | P01409, F 10667  | ENSG000001 FARS2          | 6  | Aminoacyl-tRNA synthetase | Mitochondrion                        | 5  | 0.925 | 0.338909043  | 12.57 | 484.2   | 523.2   | 16.73 | 5.86  | High | 1 |
| FALSE | High   | Master | PrC Q9Y5A9-1 | YTH domain                         | 0     | 37.994  | 13 | 5  | 7   | 4  | 579  | 62.3  | 8.79  | 20.29  | 5  | cell organ      | cytoplasm; protein              | P04146, F 51441  | ENSG000001 YTHDF2         | 1  |                           |                                      | 0  | 0.925 | 0.868956991  | 0.41  | 1031.5  | 1072.9  | 7.02  | 5.27  | High | 1 |
| FALSE | High   | Master | PrC Q13362   | Serine/threonine                   | 0     | 9.585   | 8  | 4  | 4   | 4  | 524  | 61    | 6.87  | 4.61   | 4  | metabolic       | chromosome; enzyme              | P01603, F 5527   | ENSG000001 PPP2R3C        | 14 | PI3K-Akt signaling        | Focal Adhesion Beta-catenin          | 74 | 0.925 | 0.968042879  | 42.49 | 588.1   | 635.9   | 23.8  | 12.79 | High | 1 |
| FALSE | High   | Master | PrC Q96K91   | 60S ribosomal protein L13          | 0     | 59.985  | 71 | 12 | 29  | 12 | 165  | 17.8  | 9.42  | 66.86  | 12 | cell organ      | cytosol; membrane protein       | P00298, F 6136   | ENSG000001 RPL12          | 3  | Ribosome                  | Cytoplasmic Peptide chain            | 34 | 0.924 | 0.086199992  | 0.72  | 6427.4  | 6942.2  | 5.02  | 3.28  | High | 1 |
| FALSE | High   | Master | PrC Q92499   | ATP-dependent                      | 0     | 83.078  | 24 | 17 | 31  | 17 | 740  | 82.4  | 7.23  | 61.12  | 17 | cell organ      | cytoplasm; catalytic ac         | P00270, F 1653   | ENSG000001 DDXL1          | X  |                           |                                      | 5  | 0.924 | 0.165456466  | 1.7   | 7754.1  | 8699.2  | 10.31 | 2.95  | High | 1    |   |
| FALSE | High   | Master | PrC Q92499   | negative regulation of             | 0.005 | 2.554   | 12 | 1  | 2   | 1  | 68   | 7     | 9.42  | 48.91  | 1  | metabolic       | cytoplasm; protein              | 550643           | ENSG000001 LOC5064        | X  |                           |                                      | 0  | 0.924 | 0.461307705  | 21.66 | 431.2   | 470     | 3.96  | 12.24 | High | 1    |   |
| FALSE | High   | Master | PrC Q96A83   | isochorin                          | 0     | 20.429  | 34 | 3  | 3   | 3  | 205  | 22.3  | 7.77  | 9.59   | 3  | metabolic       | cytoplasm; catalytic ac         | P00857, F 7963   | ENSG000001 ISOC2          | 9  |                           |                                      | 0  | 0.924 | 0.578528908  | 38.36 | 342.8   | 370.8   | 24.88 | 18.3  | High | 1    |   |
| FALSE | High   | Master | PrC P62258-1 | 14-3-3 protein                     | 0     | 185.021 | 69 | 23 | 108 | 20 | 255  | 29.4  | 4.74  | 275.99 | 23 | cell organ      | cytoplasm; protein              | P00244, F 7531   | ENSG000001 YWHAH          | 17 | CHRNA1                    | Cell Cycle; Regulation               | 65 | 0.924 | 0.649932811  | 5.13  | 31793.6 | 34221   | 10.15 | 2.98  | High | 1 |
| FALSE | High   | Master | PrC Q15381-1 | Nuclear                            | 0     | 20.746  | 4  | 2  | 3   | 2  | 856  | 95    | 6.48  | 9.92   | 2  | metabolic       | membrane; catalytic ac          | P00004, F 4931   | ENSG000001 NNL1           | 1  | Ribosome                  |                                      | 1  | 0.924 | 0.762624893  | 41.34 | 355.4   | 384.8   | 16.25 | 16.98 | High | 1    |   |
| FALSE | High   | Master | PrC P18859   | ATP synthase                       | 0     | 46.922  | 56 | 6  | 18  | 6  | 108  | 12.6  | 9.52  | 53.67  | 6  | cell organ      | membrane; catalytic ac          | P05511, F 522    | ENSG000001 ATP5B          | 21 | Huntington's disease      | Electron Transport                   | 14 | 0.924 | 0.804783901  | 7.15  | 3569.3  | 3861.1  | 5.79  | 8.28  | High | 1 |
| FALSE | High   | Master | PrC Q8BIW2   | GRIP and                           | 0     | 9.85    | 3  | 3  | 3   | 3  | 1684 | 195.8 | 5.14  | 4.54   | 3  | cell organ      | cytoplasm; protein              | P00363, F 9648   | ENSG000001 GCC2           | 2  | Deregulation              | Retrospect                           | 5  | 0.924 | 0.920819917  | 0.13  | 91.8    | 85      | 49    | 10.58 | High | 1 |
| FALSE | High   | Master | PrC Q75534   | cold shock                         | 0     | 117.867 | 34 | 29 | 52  | 29 | 798  | 88.8  | 6.25  | 97.14  | 29 | metabolic       | cytoplasm; DNA binding          | P00313, F 7812   | ENSG000001 CSD1           | 1  |                           |                                      | 0  | 0.923 | 0.048795239  | 4.35  | 9900.2  | 10588.4 | 3.38  | 3.83  | High | 1    |   |
| FALSE | High   | Master | PrC Q75643-1 | US small nuclear                   | 0     | 347.713 | 36 | 59 | 102 | 59 | 2136 | 244.8 | 6.06  | 265.46 | 59 | cell difference | membrane; catalytic ac          | P00270, F 23020  | ENSG000001 SNRP200        | 2  | Spliceosome               | mRNA Splicing                        | 6  | 0.923 | 0.053744089  | 0.45  | 22452.9 | 24518.3 | 3.25  | 5.8   | High | 1 |
| FALSE | High   | Master | PrC Q9NR56-1 | Muscle                             | 0     | 21.515  | 16 | 5  | 8   | 5  | 388  | 41.8  | 8.9   | 19.36  | 5  | cell difference | cytoplasm; metal ion            | 4154             | ENSG000001 MBNL1          | 1  | Adipogenesis              |                                      | 1  | 0.923 | 0.06117799   | 4.32  | 2289.6  | 2448.5  | 5.1   | 3.43  | High | 1 |
| FALSE | High   | Master | PrC Q8BWU0   | Nuclear                            | 0     | 32.895  | 6  | 4  | 5   | 4  | 1156 | 128.9 | 5.1   | 24.05  | 4  | cell difference | chromosome; protein             | P03177, F 55746  | ENSG000001 NUP133         | 1  | RNA transport             | Rev-mediated                         | 77 | 0.923 | 0.09151602   | 0.88  | 802.1   | 825.3   | 4.3   | 5.53  | High | 1 |
| FALSE | High   | Master | PrC Q515H3   | WD repeat                          | 0     | 10.189  | 4  | 3  | 3   | 3  | 913  | 101.3 | 5.45  | 5.49   | 1  | metabolic       | cytoplasm; protein              | P00400, F 54521  | ENSG000001 WDRA4          | X  | Endocytosis               |                                      | 1  | 0.923 | 0.224792443  | 2.46  | 550.9   | 683.5   | 11.08 | 10.85 | High | 1 |
| FALSE | Medium | Master | PrC P46020-1 | Phosphorylation                    | 0.011 | 2.038   | 1  | 1  | 1   | 1  | 1223 | 137.2 | 6.19  | 26.1   | 1  | metabolic       | cytosol; membrane; catalytic ac | P00723, F 5255   | ENSG000001 PHKA1          | X  | Insulin signaling         | Glycogen Phosphorylation             | 8  | 0.923 | 0.258334081  | 9.04  | 107.3   | 116.3   | 5.36  | 3.11  | High | 1 |
| FALSE | High   | Master | PrC P31949   | protein S13                        | 0     | 52.699  | 56 | 6  | 34  | 6  | 105  | 11.7  | 7.12  | 63.51  | 6  | regulation      | cytoplasm; metal ion            | P00036, F 6282   | ENSG000001 S100A11        | X  | Neutrophin                |                                      | 3  | 0.923 | 0.258342911  | 7.23  | 8397.9  | 9016.8  | 26.81 | 6.33  | High | 1 |
| FALSE | High   | Master | PrC Q8NE71-1 | ATP-binding                        | 0     | 88.636  | 20 | 14 | 26  | 14 | 845  | 95.9  | 6.88  | 58.42  | 14 | defense         | cytoplasm; catalytic ac         | P00005, F 23     | ENSG000001 ABCF1          | 6  | CHRNA1                    | ABC-family                           | 2  | 0.923 | 0.566573272  | 13.85 | 7167.5  | 7768.7  | 9.5   | 3.88  | High | 1 |
| FALSE | High   | Master | PrC P62258-1 | caveolin-1                         | 0     | 19.128  | 12 | 4  | 6   | 4  | 390  | 43.5  | 5.6   | 14.72  | 4  | metabolic       | cytoplasm; protein              | P15237, F 284119 | ENSG000001 PTFR           | 17 | CHRNA1                    | RNA Polymerase                       | 3  | 0.923 | 0.667936115  | 27.1  | 953.4   | 1019    | 12.36 | 9.05  | High | 1 |
| FALSE | High   | Master | PrC P27708   | CAD protein                        | 0     | 172.691 | 19 | 32 | 43  | 28 | 2225 | 242.8 | 6.46  | 112.66 | 32 | metabolic       | cytoplasm; catalytic ac         | P00117, F 790    | ENSG000001 CAD            | 2  | Metabolic                 | Endothelial Pyrimidine               | 9  | 0.922 | 0.007513926  | 0.95  | 9671.4  | 10423.8 | 1.03  | 0.87  | High | 1 |
| FALSE | High   | Master | PrC Q9P209   | Pre-mRNA                           | 0     | 219.729 | 25 | 47 | 66  | 47 | 2335 | 273.4 | 8.84  | 161.32 | 47 | cell organ      | membrane; catalytic ac          | P01398, F 10594  | ENSG000001 PRPF8          | 17 | CHRNA1                    | mRNA Processing                      | 7  | 0.922 | 0.078585636  | 1.5   | 16488.1 | 17494.8 | 5.57  | 4.4   | High | 1 |
| FALSE | High   | Master | PrC P61306   | Ras-related                        | 0     | 51.151  | 50 | 9  | 15  | 9  | 215  | 23.9  | 6.21  | 43.58  | 9  | cell organ      | cytosol; membrane; catalytic ac | P00009, F 51552  | ENSG000001 RAB1A          | 1  | AMPA signaling            | Focal Adhesion Translocation         | 18 | 0.922 | 0.4421267219 | 18.11 | 67      |         |       |       |      |      |      |      |      |      |      |      |   |

|       |      |                     |             |   |         |    |    |    |    |     |        |       |        |    |                        |                         |                   |                   |                   |             |             |            |            |       |              |             |         |         |         |       |        |      |      |      |      |      |      |      |   |
|-------|------|---------------------|-------------|---|---------|----|----|----|----|-----|--------|-------|--------|----|------------------------|-------------------------|-------------------|-------------------|-------------------|-------------|-------------|------------|------------|-------|--------------|-------------|---------|---------|---------|-------|--------|------|------|------|------|------|------|------|---|
| FALSE | High | Master Prq P23368-1 | NAD-depen   | 0 | 40.837  | 17 | 6  | 9  | 6  | 584 | 65.4   | 7.61  | 18.43  | 6  | metabolic; mitochondr  | catalytic ac            | P100390, F 4200   | ENSG000001ME2     | 18                | Pyruvate m  |             | Major pat  | 2          | 0.917 | 0.595597634  | 41.63       | 256.3   | 279.4   | 14.25   | 25.29 | High   | High | High | High | High | High | High | 1    |   |
| FALSE | High | Master Prq Q00541-1 | Pescadillo  | 0 | 35.746  | 12 | 7  | 15 | 7  | 588 | 68     | 7.33  | 30.6   | 7  | cell organ; chromos    | protein br              | P100333, F 23481  | ENSG000001PE1     | 22                |             |             |            | 4          | 0.917 | 0.66326341   | 8.83        | 4356.5  | 4899.5  | 14.42   | 2.09  | High   | High | High | High | High | High | High | 1    |   |
| FALSE | High | Master Prq P04264   | Keratin, ty | 0 | 135.172 | 39 | 20 | 53 | 17 | 644 | 66     | 8.12  | 151.58 | 20 | cell death; cytoskele  | catalytic ac            | P100338, F 3848   | ENSG000001KRT1    | 12                | Corbiculo   | TGF-beta r  | Formation  | 7          | 0.917 | 0.775680047  | 7.06        | 13840.5 | 14594.2 | 28.74   | 8.74  | High   | High | High | High | High | High | High | 1    |   |
| FALSE | High | Master Prq P61081   | NEDD8-con   | 0 | 45.395  | 60 | 10 | 18 | 10 | 183 | 20.9   | 7.69  | 40.07  | 10 | metabolic; cytoplasm   | catalytic ac            | P100179           | ENSG000001UEB2M   | 19                | Ubiquitin r |             |            | 19         | 0.917 | 0.787491253  | 2.6         | 7054    | 7669.9  | 10.49   | 2.23  | High   | High | High | High | High | High | High | 1    |   |
| FALSE | High | Master Prq P74441   | Eukaryotic  | 0 | 67.929  | 21 | 15 | 18 | 15 | 907 | 102.73 | 7.14  | 46.06  | 15 | cell death; cytosol-me | protein br              | P100200, F 1982   | ENSG000001EFA62   | 11                | RNA trans   | Exercise-in | ISG15 anti | 8          | 0.916 | 0.0274144238 | 2.26        | 2346.4  | 2562.6  | 2.64    | 4.72  | High   | High | High | High | High | High | High | 1    |   |
| FALSE | High | Master Prq P22392-3 | isoform 3   | 0 | 159.949 | 83 | 18 | 93 | 3  | 267 | 30.1   | 8.92  | 263.54 | 18 | cell organ; cytoplasm  | catalytic ac            | P100334           | 65-4364, 4l       | ENSG000001NME1-NM | 17          | Purine met  | Nucleotide |            | 4     | 0.916        | 0.038895432 | 3.46    | 3273.9  | 3488.7  | 4.17  | 5.38   | High | 1 |
| FALSE | High | Master Prq P07868   | Cathepsin d | 0 | 35.702  | 18 | 5  | 10 | 5  | 339 | 37.8   | 6.3   | 31.88  | 5  | cell differe           | extracellular           | catalytic ac      | P100112, F 1508   | ENSG000001C5E8    | 8           | Antigen pr  | Collagen d |            | 17    | 0.916        | 0.144299637 | 3.76    | 1655.3  | 1844.7  | 3.2   | 6.99   | High | 1 |
| FALSE | High | Master Prq P51003   | Poly(A) pol | 0 | 8.432   | 3  | 2  | 2  | 2  | 745 | 82.8   | 7.37  | 0      | 2  | metabolic; cytoplasm   | catalytic ac            | P100305, F 10914  | ENSG000001PAP0LA  | 14                | mRNA sur    | mRNA Pro    | Cleavage a | 13         | 0.916 | 0.162706636  | 7.34        | 1175.7  | 1250.7  | 9.77    | 2.83  | High   | High | High | High | High | High | High | 1    |   |
| FALSE | High | Master Prq P49902   | Cytosolic p | 0 | 18.281  | 11 | 5  | 5  | 5  | 561 | 64.9   | 6.14  | 11.32  | 5  | metabolic; cytoplasm   | catalytic ac            | P105761           | 22978             | ENSG000001NTSC2   | 10          | Metabolic   | Abacavir r |            | 10    | 0.916        | 0.173933777 | 7.45    | 1411.4  | 1541.6  | 1.75  | 7.6    | High | 1 |
| FALSE | High | Master Prq Q9P2W2   | WW doma     | 0 | 33.272  | 15 | 7  | 11 | 7  | 641 | 70     | 8.38  | 16.73  | 7  | metabolic; cytoplasm   | DNA bindi               | P109429           | 51729             | ENSG000001CBP21   | 12          | Spliceosor  | mRNA Spli  |            | 5     | 0.916        | 0.189734089 | 1.4     | 1564.4  | 1697.5  | 4.07  | 1.45   | High | 1 |
| FALSE | High | Master Prq P38919   | Eukaryotic  | 0 | 108.22  | 49 | 18 | 54 | 15 | 411 | 46.8   | 6.73  | 117.25 | 18 | metabolic; cytoplasm   | catalytic ac            | P100270, F 9775   | ENSG000001EFA4A3  | 17                | mRNA sur    |             |            | 27         | 0.916 | 0.244348884  | 7.34        | 8834.1  | 10292.5 | 10.15   | 8.75  | High   | High | High | High | High | High | High | 1    |   |
| FALSE | High | Master Prq Q9Y2P8   | RNA 3'-ter  | 0 | 7.253   | 4  | 1  | 1  | 1  | 373 | 40.8   | 9.26  | 3.64   | 1  | metabolic; nucleus     | catalytic ac            | P101137, F 10171  | ENSG000001RCL1    | 9                 | Ribosome    | Major pat   |            | 6          | 0.916 | 0.445041643  | 23.53       | 157.7   | 176.4   | 12.31   | 11.09 | High   | High | High | High | High | High | High | 1    |   |
| FALSE | High | Master Prq Q96F47   | tRNA (ade   | 0 | 9.751   | 11 | 2  | 3  | 2  | 289 | 31.4   | 7.36  | 12.45  | 2  | metabolic; nucleus     | catalytic ac            | P108704, F 115708 | ENSG000001TRMT61A | 14                | tRNA mod    |             |            | 3          | 0.916 | 0.468591838  | 17.48       | 899.4   | 981.5   | 10.42   | 3.58  | High   | High | High | High | High | High | High | 1    |   |
| FALSE | High | Master Prq P17844   | probable p  | 0 | 151.992 | 40 | 31 | 75 | 22 | 614 | 69.1   | 8.92  | 152.04 | 31 | cell differe           | cytoplasm; catalytic ac | P100270, F 1655   | ENSG000001DDX5    | 17                | Proteoglyc  | mRNA Spli   |            | 7          | 0.916 | 0.717539147  | 2.44        | 18016.1 | 19672.6 | 6.4     | 5.37  | High   | High | High | High | High | High | High | 1    |   |
| FALSE | High | Master Prq P52209   | 6-phospho   | 0 | 141.746 | 51 | 18 | 39 | 18 | 483 | 53.1   | 7.23  | 137.1  | 18 | metabolic; cytoplasm   | catalytic ac            | P100393, F 5226   | ENSG000001PGD     | 1                 | Carbon me   | Pentose Ph  | Pentose ph | 9          | 0.915 | 0.023510528  | 2.77        | 11625.7 | 12680   | 1.83    | 0.69  | High   | High | High | High | High | High | High | 1    |   |
| FALSE | High | Master Prq P83731   | 60S riboso  | 0 | 57.577  | 41 | 9  | 30 | 9  | 157 | 17.8   | 11.25 | 71.67  | 9  | cell organ; cytoplasm  | protein br              | P101246           | 6152              | ENSG000001RPL24   | 3           | Ribosome    | Cytoplasm  | Peptide ch | 34    | 0.915        | 0.155970389 | 2.6     | 17751.4 | 19069.8 | 22.73 | 8.25   | High | 1 |
| FALSE | High | Master Prq Q9GZL7   | ribosome i  | 0 | 41.061  | 21 | 6  | 11 | 6  | 423 | 47.7   | 5.9   | 31.16  | 6  | cell prolif            | nucleus                 | protein br        | P104000, F 55759  | ENSG000001WDR12   | 1           |             | Major pat  |            | 4     | 0.915        | 0.196640487 | 8.78    | 4137.2  | 4783.8  | 8.15  | 6.82   | High | 1 |
| FALSE | High | Master Prq P83731   | 60S riboso  | 0 | 57.577  | 41 | 9  | 30 | 9  | 157 | 17.8   | 11.25 | 71.67  | 9  | cell organ; cytoplasm  | protein br              | P101246           | 6152              | ENSG000001RPL24   | 3           | Ribosome    | Cytoplasm  | Peptide ch | 34    | 0.915        | 0.155970389 | 2.6     | 17751.4 | 19069.8 | 22.73 | 8.25   | High | 1 |
| FALSE | High | Master Prq Q9GZL7   | ribosome i  | 0 | 41.061  | 21 | 6  | 11 | 6  | 423 | 47.7   | 5.9   | 31.16  | 6  | cell prolif            | nucleus                 | protein br        | P104000, F 55759  | ENSG000001WDR12   | 1           |             | Major pat  |            | 4     | 0.915        | 0.196640487 | 8.78    | 4137.2  | 4783.8  | 8.15  | 6.82   | High | 1 |
| FALSE | High | Master Prq P83731   | 60S riboso  | 0 | 57.577  | 41 | 9  | 30 | 9  | 157 | 17.8   | 11.25 | 71.67  | 9  | cell organ; cytoplasm  | protein br              | P101246           | 6152              | ENSG000001RPL24   | 3           | Ribosome    | Cytoplasm  | Peptide ch | 34    | 0.915        | 0.155970389 | 2.6     | 17751.4 | 19069.8 | 22.73 | 8.25   | High | 1 |
| FALSE | High | Master Prq Q9GZL7   | ribosome i  | 0 | 41.061  | 21 | 6  | 11 | 6  | 423 | 47.7   | 5.9   | 31.16  | 6  | cell prolif            | nucleus                 | protein br        | P104000, F 55759  | ENSG000001WDR12   | 1           |             | Major pat  |            | 4     | 0.915        | 0.196640487 | 8.78    | 4137.2  | 4783.8  | 8.15  | 6.82   | High | 1 |
| FALSE | High | Master Prq P83731   | 60S riboso  | 0 | 57.577  | 41 | 9  | 30 | 9  | 157 | 17.8   | 11.25 | 71.67  | 9  | cell organ; cytoplasm  | protein br              | P101246           | 6152              | ENSG000001RPL24   | 3           | Ribosome    | Cytoplasm  | Peptide ch | 34    | 0.915        | 0.155970389 | 2.6     | 17751.4 | 19069.8 | 22.73 | 8.25   | High | 1 |
| FALSE | High | Master Prq Q9GZL7   | ribosome i  | 0 | 41.061  | 21 | 6  | 11 | 6  | 423 | 47.7   | 5.9   | 31.16  | 6  | cell prolif            | nucleus                 | protein br        | P104000, F 55759  | ENSG000001WDR12   | 1           |             | Major pat  |            | 4     | 0.915        | 0.196640487 | 8.78    | 4137.2  | 4783.8  | 8.15  | 6.82   | High | 1 |
| FALSE | High | Master Prq P83731   | 60S riboso  | 0 | 57.577  | 41 | 9  | 30 | 9  | 157 | 17.8   | 11.25 | 71.67  | 9  | cell organ; cytoplasm  | protein br              | P101246           | 6152              | ENSG000001RPL24   | 3           | Ribosome    | Cytoplasm  | Peptide ch | 34    | 0.915        | 0.155970389 | 2.6     | 17751.4 | 19069.8 | 22.73 | 8.25   | High | 1 |
| FALSE | High | Master Prq Q9GZL7   | ribosome i  | 0 | 41.061  | 21 | 6  | 11 | 6  | 423 | 47.7   | 5.9   | 31.16  | 6  | cell prolif            | nucleus                 | protein br        | P104000, F 55759  | ENSG000001WDR12   | 1           |             | Major pat  |            | 4     | 0.915        | 0.196640487 | 8.78    | 4137.2  | 4783.8  | 8.15  | 6.82   | High | 1 |
| FALSE | High | Master Prq P83731   | 60S riboso  | 0 | 57.577  | 41 | 9  | 30 | 9  | 157 | 17.8   | 11.25 | 71.67  | 9  | cell organ; cytoplasm  | protein br              | P101246           | 6152              | ENSG000001RPL24   | 3           | Ribosome    | Cytoplasm  | Peptide ch | 34    | 0.915        | 0.155970389 | 2.6     | 17751.4 | 19069.8 | 22.73 | 8.25   | High | 1 |
| FALSE | High | Master Prq Q9GZL7   | ribosome i  | 0 | 41.061  | 21 | 6  | 11 | 6  | 423 | 47.7   | 5.9   | 31.16  | 6  | cell prolif            | nucleus                 | protein br        | P104000, F 55759  | ENSG000001WDR12   | 1           |             | Major pat  |            | 4     | 0.915        | 0.196640487 | 8.78    | 4137.2  | 4783.8  | 8.15  | 6.82   | High | 1 |
| FALSE | High | Master Prq P83731   | 60S riboso  | 0 | 57.577  | 41 | 9  | 30 | 9  | 157 | 17.8   | 11.25 | 71.67  | 9  | cell organ; cytoplasm  | protein br              | P101246           | 6152              | ENSG000001RPL24   | 3           | Ribosome    | Cytoplasm  | Peptide ch | 34    | 0.915        | 0.155970389 | 2.6     | 17751.4 | 19069.8 | 22.73 | 8.25   | High | 1 |
| FALSE | High | Master Prq Q9GZL7   | ribosome i  | 0 | 41.061  | 21 | 6  | 11 | 6  | 423 | 47.7   | 5.9   | 31.16  | 6  | cell prolif            | nucleus                 | protein br        | P104000, F 55759  | ENSG000001WDR12   | 1           |             | Major pat  |            | 4     | 0.915        | 0.196640487 | 8.78    | 4137.2  | 4783.8  | 8.15  | 6.82   | High | 1 |
| FALSE | High | Master Prq P83731   | 60S riboso  | 0 | 57.577  | 41 | 9  | 30 | 9  | 157 | 17.8   | 11.25 | 71.67  | 9  | cell organ; cytoplasm  | protein br              | P101246           | 6152              | ENSG000001RPL24   | 3           | Ribosome    | Cytoplasm  | Peptide ch | 34    | 0.915        | 0.155970389 | 2.6     | 17751.4 | 19069.8 | 22.73 | 8.25   | High | 1 |
| FALSE | High | Master Prq Q9GZL7   | ribosome i  | 0 | 41.061  | 21 | 6  | 11 | 6  | 423 | 47.7   | 5.9   | 31.16  | 6  | cell prolif            | nucleus                 | protein br        | P104000, F 55759  | ENSG000001WDR12   | 1           |             | Major pat  |            | 4     | 0.915        | 0.196640487 | 8.78    | 4137.2  | 4783.8  | 8.15  | 6.82   | High | 1 |
| FALSE | High | Master Prq P83731   | 60S riboso  | 0 | 57.577  | 41 | 9  | 30 | 9  | 157 | 17.8   | 11.25 | 71.67  | 9  | cell organ; cytoplasm  | protein br              | P101246           | 6152              | ENSG000001RPL24   | 3           | Ribosome    | Cytoplasm  | Peptide ch | 34    | 0.915        | 0.155970389 | 2.6     | 17751.4 | 19069.8 | 22.73 | 8.25   | High | 1 |
| FALSE | High | Master Prq Q9GZL7   | ribosome i  | 0 | 41.061  | 21 | 6  | 11 | 6  | 423 | 47.7   | 5.9   | 31.16  | 6  | cell prolif            | nucleus                 | protein br        | P104000, F 55759  | ENSG000001WDR12   | 1           |             | Major pat  |            | 4     | 0.915        | 0.196640487 | 8.78    | 4137.2  | 4783.8  | 8.15  | 6.82   | High | 1 |
| FALSE | High | Master Prq P83731   | 60S riboso  | 0 | 57.577  | 41 | 9  | 30 | 9  | 157 | 17.8   | 11.25 | 71.67  | 9  | cell organ; cytoplasm  | protein br              | P101246           | 6152              | ENSG000001RPL24   | 3           | Ribosome    | Cytoplasm  | Peptide ch | 34    | 0.915        | 0.155970389 | 2.6     | 17751.4 | 19069.8 | 22.73 | 8.25   | High | 1 |
| FALSE | High | Master Prq Q9GZL7   | ribosome i  | 0 | 41.061  | 21 | 6  | 11 | 6  | 423 | 47.7   | 5.9   | 31.16  | 6  | cell prolif            | nucleus                 | protein br        | P104000, F 55759  | ENSG000001WDR12   | 1           |             | Major pat  |            | 4     | 0.915        | 0.196640487 | 8.78    | 4137.2  | 4783.8  | 8.15  | 6.82   | High | 1 |
| FALSE | High | Master Prq P83731   | 60S riboso  | 0 | 57.577  | 41 | 9  | 30 | 9  | 157 | 17.8   | 11.25 | 71.67  | 9  | cell organ; cytoplasm  | protein br              | P101246           | 6152              | ENSG000001RPL24   | 3           | Ribosome    | Cytoplasm  | Peptide ch | 34    | 0.915        | 0.155970389 | 2.6     | 17751.4 | 19069.8 | 22.73 | 8.25   | High | 1 |
| FALSE | High | Master Prq Q9GZL7   | ribosome i  | 0 | 41.061  | 21 | 6  | 11 | 6  | 423 | 47.7   | 5.9   | 31.16  | 6  | cell prolif            | nucleus                 | protein br        | P104000, F 55759  | ENSG000001WDR12   | 1           |             | Major pat  |            | 4     | 0.915        | 0.196640487 | 8.78    | 4137.2  | 4783.8  | 8.15  | 6.82</ |      |      |      |      |      |      |      |   |

|       |      |                     |              |       |         |    |    |     |    |      |       |       |         |    |              |              |             |                  |           |           |            |             |             |             |             |             |             |             |          |          |         |       |       |      |      |      |      |      |      |      |      |      |   |
|-------|------|---------------------|--------------|-------|---------|----|----|-----|----|------|-------|-------|---------|----|--------------|--------------|-------------|------------------|-----------|-----------|------------|-------------|-------------|-------------|-------------|-------------|-------------|-------------|----------|----------|---------|-------|-------|------|------|------|------|------|------|------|------|------|---|
| FALSE | High | Master Prq Q9Y5M8   | signal reco  | 0     | 57.496  | 37 | 9  | 20  | 9  | 271  | 29.7  | 9.04  | 48.24   | 9  | regulation   | cytoplasm;   | nucleotide  | P00009, F 58477  | ENSG00000 | SRPR8     | 3          | Protein exp | XBPI1 [5]   | ac          | 7           | 0.906       | 0.025316635 | 2.99        | 4697.5   | 5262.9   | 2.35    | 1.48  | High  | High | High | High | High | High | High | High | 1    |      |   |
| FALSE | High | Master Prq P08579   | U2 small n   | 0     | 20.786  | 16 | 4  | 10  | 3  | 225  | 25.5  | 9.72  | 19.47   | 4  | metabolic    | nucleus;     | protein bi  | P00076, F 6629   | ENSG00000 | SNRPB2    | 20         | Spliceosom  | mRNA Pro    | mRNA Spli   | 6           | 0.906       | 0.108072079 | 1.11        | 1269.2   | 1414.2   | 1.87    | 8.56  | High  | High | High | High | High | High | High | High | 1    |      |   |
| FALSE | High | Master Prq Q9N12-1  | Helicase 9   | 0     | 14.631  | 4  | 4  | 4   | 4  | 1246 | 137.7 | 6.06  | 7.81    | 4  | metabolic    | cytoplasm;   | catalytic a | P00270, F 6499   | ENSG00000 | SKIVL2    | 6          | RNA degra   | mRNA dec    | 8           | 0.906       | 0.122816304 | 1.42        | 1324.5      | 1516.1   | 12.61    | 3.95    | High  | High  | High | High | High | High | High | High | 1    |      |      |   |
| FALSE | High | Master Prq Q00232-1 | 26s proteo   | 0     | 70.477  | 31 | 11 | 17  | 11 | 456  | 52.9  | 7.65  | 56.88   | 11 | metabolic    | cytoplasm;   | catalytic a | P01399           | 5718      | ENSG00000 | MSO12      | 17          | Epstein-Ba  | Proteasom   | Regulat     | 153         | 0.906       | 0.139614748 | 10.05    | 5784.2   | 6106.8  | 9.99  | 3.44  | High | 1    |   |
| FALSE | High | Master Prq Q9NY12-1 | H/ACA ribz   | 0     | 19.577  | 32 | 5  | 7   | 5  | 217  | 22.3  | 10.92 | 12.08   | 5  | cell organ   | nucleus      | protein bi  | P04041           | 54433     | ENSG00000 | GAR1       | 4           | Ribosome    | rRNA mod    | 5           | 0.906       | 0.149385463 | 0.54        | 1833.1   | 2000.6   | 1.29    | 5.2   | High  | High | High | High | High | High | High | High | 1    |      |   |
| FALSE | High | Master Prq P56556   | NADH deh     | 0     | 5.67    | 12 | 2  | 3   | 2  | 154  | 17.9  | 10.14 | 6.93    | 2  | cell organ   | membrane     | catalytic a | P05347, F 4700   | ENSG00000 | NDOUF4    | 22         | Metabolic   | Electron Tr | Complex I   | 13          | 0.906       | 0.293463233 | 17.02       | 1015.8   | 1147.3   | 4.99    | 9.32  | High  | High | High | High | High | High | High | High | 1    |      |   |
| FALSE | High | Master Prq P19338   | Nucleolin    | 0     | 370.239 | 54 | 59 | 198 | 59 | 710  | 76.6  | 4.7   | 403.77  | 59 | regulation   | cytoplasm;   | DNA bindi   | P00000           | NCL       | 6         | ENSG00000  | NC          | 2           | Pathogeni   | Major pat   | 7           | 0.906       | 0.446762056 | 5.64     | 71671.6  | 75455.5 | 7.17  | 5.05  | High | 1    |   |
| FALSE | High | Master Prq Q6P57-1  | Acylglyoxy   | 0     | 6.016   | 17 | 2  | 2   | 2  | 224  | 24.8  | 7.39  | 4       | 2  | metabolic    | cytoplasm;   | catalytic a | P01557           | 81899     | ENSG00000 | FAH01      | 16          | Tyrosine m  |             | 2           | 0.906       | 0.611235136 | 34.27       | 199.2    | 219.8    | 14.13   | 12.64 | High  | High | High | High | High | High | High | High | 1    |      |   |
| FALSE | High | Master Prq Q13167-1 | Cullin-2 [O  | 0     | 13.7    | 9  | 6  | 7   | 6  | 745  | 86.9  | 6.92  | 6.75    | 6  | metabolic    | cytosol      | catalytic a | P00888, F 8453   | ENSG00000 | CUL2      | 10         | Renal cell  | Oxygen-de   | 20          | 0.906       | 0.72487696  | 18.58       | 1187.7      | 1375.8   | 23.77    | 5.88    | High  | High  | High | High | High | High | High | High | High | 1    |      |   |
| FALSE | High | Master Prq Q99623   | Prohibitin   | 0     | 65.537  | 37 | 12 | 32  | 12 | 299  | 33.3  | 9.83  | 70.59   | 12 | cell organ   | cell surface | protein bi  | P01145           | 11331     | ENSG00000 | PRB2       | 12          | Processing  |             | 3           | 0.905       | 0.026127178 | 2.9         | 9511.2   | 10868.6  | 4.47    | 4.64  | High  | High | High | High | High | High | High | High | 1    |      |   |
| FALSE | High | Master Prq Q9Y273   | guanine de   | 0     | 77.435  | 41 | 12 | 21  | 12 | 454  | 51    | 5.68  | 53.1    | 12 | metabolic    | cytosol      | catalytic a | P01978, F 9615   | ENSG00000 | GDA       | 9          | Purine met  | Purine cat  | 6           | 0.905       | 0.08123649  | 4.12        | 3439.2      | 3829.4   | 7.5      | 1.05    | High  | High  | High | High | High | High | High | High | High | 1    |      |   |
| FALSE | High | Master Prq Q9NG88   | Fructose-2   | 0     | 5.682   | 6  | 1  | 1   | 1  | 270  | 30    | 7.69  | 2.48    | 1  | cell death;  | cytoplasm;   | catalytic a | P00300           | 57103     | ENSG00000 | CL2orf5, T | 12          | Central car | TP53 Regu   | 7           | 0.905       | 0.117157696 | 4.22        | 151.8    | 176.3    | 8.31    | 3.16  | High  | High | High | High | High | High | High | High | High | 1    |   |
| FALSE | High | Master Prq Q15102   | Platelet-ac  | 0     | 19.824  | 29 | 5  | 7   | 5  | 231  | 25.7  | 6.84  | 13.71   | 5  | metabolic    | cytoplasm;   | catalytic a | P00657, F 5050   | ENSG00000 | PAFAH1B3  | 19         | Metabolic   | COPH-ind    | 7           | 0.905       | 0.129292920 | 3.18        | 1054.5      | 1182.8   | 7.69     | 3.19    | High  | High  | High | High | High | High | High | High | High | 1    |      |   |
| FALSE | High | Master Prq P78417   | Glutathion   | 0     | 43.623  | 39 | 10 | 22  | 10 | 241  | 27.5  | 6.6   | 29.28   | 10 | cellular ho  | cytoplasm;   | antioxidan  | P00043, F 9446   | ENSG00000 | GSTO1     | 10         | Glutathion  | Myometri    | Gene and    | 20          | 0.905       | 0.148424647 | 10.4        | 5826.6   | 6441.2   | 3.13    | 4.72  | High  | High | High | High | High | High | High | High | High | 1    |   |
| FALSE | High | Master Prq Q13418   | Integrin-lir | 0     | 8.92    | 8  | 3  | 3   | 3  | 452  | 51.4  | 8.07  | 6.82    | 3  | cell organ   | cytoplasm;   | catalytic a | P00023, F 3611   | ENSG00000 | ILK       | 11         | Endometri   | Integrin-m  | Localizati  | 15          | 0.905       | 0.322303383 | 13.72       | 783.5    | 825.8    | 5.53    | 8.92  | High  | High | High | High | High | High | High | High | High | 1    |   |
| FALSE | High | Master Prq Q9H2J4   | phosducin    | 0     | 15.006  | 14 | 3  | 4   | 3  | 239  | 27.6  | 4.84  | 5.42    | 3  | cell death;  | cytoplasm;   | catalytic a | P00214           | 79031     | ENSG00000 | PDL3       | 2           | Endocytos   |             | 0           | 0.905       | 0.388928011 | 22.74       | 484.5    | 576.1    | 17.51   | 16.97 | High  | High | High | High | High | High | High | High | High | 1    |   |
| FALSE | High | Master Prq Q13596   | Sorting net  | 0     | 39.934  | 16 | 7  | 13  | 5  | 522  | 59    | 5.15  | 26.83   | 7  | cell organ   | cytoplasm;   | protein bi  | P00787, F 6642   | ENSG00000 | SNX1      | 15         | Endocytos   |             | 1           | 0.905       | 0.463750599 | 25.24       | 1384.5      | 1424     | 17.56    | 5.09    | High  | High  | High | High | High | High | High | High | High | 1    |      |   |
| FALSE | High | Master Prq P04114   | apolipopro   | 0.004 | 2.683   | 0  | 1  | 1   | 1  | 4563 | 515.3 | 7.05  | 2.18    | 1  | cell organ   | cytoplasm;   | protein bi  | P01347, F 338    | ENSG00000 | APOB      | 2          | Vitamin di  | Selenium P  | Post-transl | 46          | 0.905       | 0.50956131  | 25.89       | 231.8    | 261.4    | 8.29    | 13.22 | High  | High | High | High | High | High | High | High | High | 1    |   |
| FALSE | High | Master Prq Q04391-1 | band 4.1-l   | 0     | 39.09   | 11 | 9  | 10  | 9  | 1005 | 112.5 | 5.44  | 23.01   | 9  | cell divisio | cytoplasm;   | protein bi  | P00373, F 2037   | ENSG00000 | EPB41L2   | 6          | Tight junct | Neurexins   | 4           | 0.905       | 0.673198918 | 5.8         | 2279.2      | 2460.2   | 12.61    | 1.78    | High  | High  | High | High | High | High | High | High | High | 1    |      |   |
| FALSE | High | Master Prq Q9NBZ7-1 | UOP-glucu    | 0     | 7.559   | 6  | 1  | 2   | 1  | 420  | 47.5  | 8.94  | 6.63    | 1  | cell organ   | cytoplasm;   | catalytic a | P01073, F 80146  | ENSG00000 | UKX1      | 2          | Amino sug   |             | 2           | 0.905       | 0.818517763 | 72.39       | 30          | 27.4     | 69.88    | 21.31   | High  | High  | High | High | High | High | High | High | High | 1    |      |   |
| FALSE | High | Master Prq Q9S169   | NADH deh     | 0     | 14.774  | 30 | 4  | 4   | 4  | 186  | 21.8  | 6.8   | 10.05   | 4  | cell organ   | endoplasm    | catalytic a | P05821           | 4714      | ENSG00000 | NDUFB8     | 10          | Metabolic   | Electron Tr | Mitochond   | 15          | 0.905       | 0.925769083 | 0.21     | 559      | 592.9   | 3.6   | 13.44 | High | 1 |
| FALSE | High | Master Prq Q06210-1 | glutamine    | 0     | 115.608 | 32 | 16 | 33  | 16 | 699  | 78.8  | 7.11  | 105.52  | 16 | metabolic    | cytosol      | catalytic a | P00110, F 2673   | ENSG00000 | GFTT1     | 2          | Amino sug   |             | 17          | 0.904       | 0.036557284 | 2.39        | 6802.6      | 7592.8   | 8.15     | 3.42    | High  | High  | High | High | High | High | High | High | High | 1    |      |   |
| FALSE | High | Master Prq P0406-1  | glyceralde   | 0     | 489.219 | 84 | 30 | 391 | 30 | 335  | 36    | 8.46  | 1150.36 | 30 | cell death;  | cytoplasm;   | catalytic a | P00044, F 2597   | ENSG00000 | GAPDH     | 12         | Glycolysis  | Cori Cycle  | Glucose     | 15          | 0.904       | 0.17524628  | 40.49       | 119900.5 | 134791.1 | 12.25   | 2.48  | High  | High | High | High | High | High | High | High | High | 1    |   |
| FALSE | High | Master Prq Q14684   | Ribosomal    | 0     | 21.867  | 8  | 5  | 8   | 5  | 758  | 84.4  | 9.76  | 12.61   | 5  | metabolic    | cytosol;nu   | protein bi  | P05997           | 23076     | ENSG00000 | RL18B      | 21          | 0           | 0.904       | 0.245310651 | 15.24       | 630         | 696.7       | 8.61     | 2.27     | High    | High  | High  | High | High | High | High | High | High | 1    |      |      |   |
| FALSE | High | Master Prq Q9Y306   | mitochond    | 0     | 13.239  | 22 | 3  | 11  | 3  | 152  | 16.9  | 8.79  | 21.84   | 3  | cell death;  | endoplasm    | protein bi  | P014852, F 51024 | ENSG00000 | F51       | 7          | 0           | 0.904       | 0.270212051 | 6.58        | 3361.6      | 4047        | 10.42       | 16.76    | High     | High    | High  | High  | High | High | High | High | High | High | 1    |      |      |   |
| FALSE | High | Master Prq P78330   | phosphose    | 0     | 7.634   | 12 | 2  | 2   | 2  | 225  | 25    | 5.69  | 4.12    | 2  | metabolic    | cytoplasm;   | catalytic a | P00102, F 5723   | ENSG00000 | PSPH      | 7          | Carbon me   | Trans-sulf  | Serine bio  | 9           | 0.904       | 0.55652586  | 7.28        | 836      | 872.2    | 8.33    | 7.29  | High  | High | High | High | High | High | High | High | High | 1    |   |
| FALSE | High | Master Prq P61353   | 60S riboso   | 0     | 37.717  | 55 | 8  | 25  | 8  | 136  | 15.9  | 10.56 | 42.41   | 8  | cell organ   | cytosol;me   | RNA bindi   | P00467, F 6155   | ENSG00000 | RLP27     | 17         | Ribosome    | Cytoplasm   | Peptide ch  | 34          | 0.903       | 0.020882019 | 1.66        | 15073.5  | 17270.1  | 10.08   | 10.25 | High  | High | High | High | High | High | High | High | High | 1    |   |
| FALSE | High | Master Prq P68366   | Tubulin al   | 0     | 223.338 | 53 | 21 | 139 | 4  | 448  | 49.9  | 5.06  | 475.12  | 21 | cell organ   | cytoplasm;   | catalytic a | P00091, F 7277   | ENSG00000 | TUBAA4    | 2          | Gap juncti  | Pathogeni   | COPH-ind    | 76          | 0.903       | 0.251318614 | 13.75       | 3102.1   | 3409.9   | 13.86   | 2.15  | High  | High | High | High | High | High | High | High | High | 1    |   |
| FALSE | High | Master Prq Q9Y4E8   | ubiquitin c  | 0     | 17.942  | 5  | 4  | 4   | 4  | 981  | 12.3  | 5.22  | 11.26   | 4  | cell organ   | cytoplasm;   | catalytic a | P00443, F 9958   | ENSG00000 | USP15     | 12         | UCH pro     |             | 10          | 0.903       | 0.289565845 | 7.25        | 1095.3      | 1222.3   | 10.95    | 1.85    | High  | High  | High | High | High | High | High | High | High | 1    |      |   |
| FALSE | High | Master Prq P09234   | U1 small n   | 0     | 29.146  | 30 | 4  | 8   | 4  | 159  | 17.4  | 9.67  | 29.44   | 4  | cell organ   | nucleus;     | metal ion   | P06220           | 6631      | ENSG00000 | SNRPC      | 6           | Spliceosom  | mRNA Spli   | 5           | 0.903       | 0.569597046 | 32.6        | 2106.9   | 2052.6   | 19.5    | 11.79 | High  | High | High | High | High | High | High | High | High | 1    |   |
| FALSE | Low  | Master Prq Q9NFMA   | adenylate    | 0.057 | 1.136   | 1  | 1  | 1   | 1  | 1077 | 119.7 | 7.47  | 2.4     | 1  | metabolic    | cytoplasm;   | catalytic a | P00211, F 196883 | ENSG00000 | ADCY4     | 14         | GABAergic   | Myometri    | Adenylate   | 78          | 0.903       | 0.589734664 | 45.5        | 133      | 141.1    | 67.04   | 11.46 | High  | High | High | High | High | High | High | High | High | 1    |   |
| FALSE | Low  | Master Prq Q9GNR2   | Integrator   | 0.057 | 1.136   | 1  | 1  | 1   | 1  | 710  | 82.2  | 7.44  | 0       | 1  | metabolic    | nucleus      | protein bi  | 55174            | ENSG00000 | INTS10    | 8          | RNA polyr   |             | 3           | 0.903       | 0.894182177 | 24.52       | 92.2        | 102.8    | 22.13    | 7.84    | High  | High  | High | High | High | High | High | High | High | 1    |      |   |
| FALSE | High | Master Prq Q14697-1 | Neutral al   | 0     | 200.716 | 38 | 33 | 100 | 1  | 944  | 106.8 | 6.14  | 257.85  | 33 | metabolic    | endoplasm    | catalytic a | P01055, F 23193  | ENSG00000 | GANAB     | 19         | N-Glycan b  | Calnexin/c  | 8           | 0.902       | 0.039522859 | 3.55        | 1462.2      | 1577.7   | 4.59     | 2.27    | High  | High  | High | High | High | High | High | High | High | High | 1    |   |
| FALSE | High | Master Prq P04029   | 60S riboso   | 0     | 61.622  | 50 | 14 | 42  | 14 | 203  | 23.6  | 10.93 | 60.98   | 14 | cell organ   | cytoplasm;   | RNA bindi   | P00572           | 23521     | ENSG00000 | RLP13A     | 11          | Ribosome    | Cytoplasm   | Peptide ch  | 34          | 0.902       | 0.040760631 | 2.02     | 16708.5  | 18529.4 | 4.01  | 7.34  | High | 1 |
| FALSE | High | Master Prq P09488   | Glutathion   | 0     | 25.538  | 34 | 7  | 9   | 7  | 218  | 25.7  | 6.7   | 16.83   | 7  | metabolic    | cytoplasm;   | catalytic a | P00043, F 2944   | ENSG00000 | GSTM1     | 1          | Platinum d  | Glutathion  | Glutathion  | 15          | 0.902       | 0.055234041 | 2.38        | 3303.9   | 3844     | 6.5     | 3.47  | High  | High | High | High | High | High | High | High | High | 1    |   |
| FALSE | High | Master Prq Q0A096   | RNA-bindin   | 0     | 11.956  | 7  | 3  | 3   | 3  | 593  | 64.1  | 7.68  | 5.63    | 3  | cell death;  | nucleus      | RNA bindi   | P00076, F 54502  | ENSG00000 |           |            |             |             |             |             |             |             |             |          |          |         |       |       |      |      |      |      |      |      |      |      |      |   |

|       |        |                     |             |       |         |    |    |     |    |      |       |       |        |    |                         |             |           |            |            |            |       |                        |                        |              |             |             |             |             |         |         |         |       |      |      |      |      |      |      |      |   |
|-------|--------|---------------------|-------------|-------|---------|----|----|-----|----|------|-------|-------|--------|----|-------------------------|-------------|-----------|------------|------------|------------|-------|------------------------|------------------------|--------------|-------------|-------------|-------------|-------------|---------|---------|---------|-------|------|------|------|------|------|------|------|---|
| FALSE | High   | Master Pcr F21291   | Cysteine ai | 0     | 97.343  | 67 | 9  | 29  | 9  | 193  | 20.6  | 8.57  | 105.9  | 9  | nucleus                 | metal ion I | P00412    | 1465       | ENSG000001 | CSRP1      |       | Mecp2 acn MTP1 actv    | 4                      | 0.896        | 0.99138503  | 8.55        | 10484.9     | 11710.7     | 25.46   | 9.82    | High    | High  | High | High | High | High | 1    |      |      |   |
| FALSE | High   | Master Pcr F10155-1 | 60 kDa SS-  | 0     | 16.757  | 9  | 4  | 5   | 4  | 538  | 60.6  | 8.03  | 7.44   | 4  | cell organ cytoplasm    | metal ion I | P05731    | 6738       | ENSG000001 | TROV2      |       |                        | 1                      | 0.895        | 0.022865705 | 3.4         | 280.8       | 325.9       | 7.38    | 6.51    | High    | High  | High | High | High | High | 1    |      |      |   |
| FALSE | High   | Master Pcr F49321   | Nuclear aa  | 0     | 189.936 | 45 | 28 | 56  | 28 | 788  | 85.2  | 43    | 150.25 | 28 | cell organ cytoplasm    | protein bin | P00515    | F_4678     | ENSG000001 | NASR       | 1     |                        | 0                      | 0.895        | 0.02999053  | 3.83        | 11271       | 12596.6     | 6.08    | 2.82    | High    | High  | High | High | High | High | 1    |      |      |   |
| FALSE | High   | Master Pcr Q14929   | histone aa  | 0     | 21.167  | 18 | 5  | 7   | 5  | 419  | 49.5  | 5.69  | 14.69  | 5  | cell organ cytoplasm    | catalytic a | P01394    | 8520       | ENSG000001 | HAT1       | 2     | Alcoholism             | HATS acety             | 4            | 0.895       | 0.032406411 | 0.05        | 1146.8      | 1335    | 2.99    | 4.4     | High  | High | High | High | High | High | 1    |      |   |
| FALSE | High   | Master Pcr P05198   | Eukaryotic  | 0     | 61.209  | 42 | 11 | 23  | 11 | 315  | 36.1  | 5.08  | 10.11  | 11 | cell commu cytoplasm    | protein bin | P00575    | F_1965     | ENSG000001 | EF2S1      | 14    | Herpes sim Translatior | Formation              | 25           | 0.895       | 0.121982893 | 7.68        | 5983.4      | 6539.4  | 1.68    | 6.05    | High  | High | High | High | High | High | 1    |      |   |
| FALSE | High   | Master Pcr Q15008   | 265 proteas | 0     | 35.16   | 23 | 7  | 13  | 7  | 389  | 45.5  | 5.62  | 42.07  | 7  | metabolic cytosol/ex    | catalytic a | P01399    | F_9861     | ENSG000001 | PSMD6      | 3     | Epstein-Ba             | Proteasom Regulation   | 153          | 0.895       | 0.169122783 | 11.62       | 4310.4      | 5041.9  | 6.76    | 7.37    | High  | High | High | High | High | High | 1    |      |   |
| FALSE | High   | Master Pcr P05198   | Annekin A   | 0     | 294.477 | 83 | 38 | 161 | 38 | 339  | 38.6  | 7.75  | 394.61 | 38 | cell organ cytoplasm    | cell surfac | enzyme re | P00519     | 302        | ENSG000001 | ANXA2 | 15                     |                        | 12           | 0.895       | 0.264519036 | 18.3        | 55761.2     | 57348.8 | 1.22    | 7.81    | High  | High | High | High | High | High | 1    |      |   |
| FALSE | High   | Master Pcr QZM281-1 | AP2-assoc   | 0     | 9.076   | 4  | 2  | 2   | 2  | 961  | 103.8 | 6.6   | 4.05   | 2  | cell organ cytoplasm    | catalytic a | P00609    | F_22848    | ENSG000001 | AAL1       | 2     |                        | 4                      | 0.895        | 0.275442354 | 2.45        | 270.4       | 294.3       | 7.21    | 11.72   | High    | High  | High | High | High | High | 1    |      |      |   |
| FALSE | High   | Master Pcr F30484   | HLA class I | 0     | 26.336  | 20 | 6  | 17  | 2  | 362  | 40.4  | 6.62  | 24.61  | 6  | regulation cell surfac  | protein bin | P01025    | F_3106     | ENSG000001 | HLA-B      | 6     |                        | 15                     | 0.895        | 0.313444546 | 5.19        | 137.0       | 190.5       | 25.14   | 26.85   | High    | High  | High | High | High | High | 1    |      |      |   |
| FALSE | High   | Master Pcr P62847-1 | 40S riboso  | 0     | 36.827  | 31 | 5  | 17  | 5  | 133  | 15.4  | 10.78 | 55.88  | 5  | cell organ cytosol/me   | protein bin | P01282    | G_2239     | ENSG000001 | RPS24      | 10    | Ribosome               | Cytoplasmic Peptide ch | 38           | 0.895       | 0.593570341 | 9.58        | 6433.9      | 7189.3  | 8.1     | 7.68    | High  | High | High | High | High | High | 1    |      |   |
| FALSE | High   | Master Pcr QN6092   | Coordinate  | 0     | 4.672   | 7  | 1  | 3   | 1  | 184  | 20.1  | 1     |        | 1  | cell organ cytosol/me   | protein bin | P11540    | S_5352     | ENSG000001 | CPSC5      | 17    |                        | 3                      | 0.895        | 0.894728374 | 49.21       | 611.7       | 681.2       | 42.62   | 3.54    | High    | High  | High | High | High | High | 1    |      |      |   |
| FALSE | High   | Master Pcr P09906-1 | Ieukotrien  | 0     | 68.848  | 25 | 12 | 20  | 12 | 61.2 | 69.2  | 61.8  | 54.76  | 12 | metabolic cytoplasm     | catalytic a | P01433    | F_4048     | ENSG000001 | LTA4H      | 12    | Metabolic              | Cyclooxygenase II      | 11           | 0.894       | 0.028804927 | 4.74        | 624.6       | 696.24  | 2.13    | 2.57    | High  | High | High | High | High | High | 1    |      |   |
| FALSE | High   | Master Pcr P62888   | 60S riboso  | 0     | 87.388  | 67 | 7  | 50  | 7  | 115  | 12.8  | 9.63  | 122.8  | 7  | cell organ cytoplasm    | protein bin | P01248    | G_6156     | ENSG000001 | RP138      | 8     | Ribosome               | Selenium H             | Peptide ch   | 35          | 0.894       | 0.054842452 | 5.25        | 15415.9 | 17245.9 | 1.02    | 5.24  | High | High | High | High | High | High | 1    |   |
| FALSE | High   | Master Pcr QGN84-1  | rRNA metit  | 0     | 8.95    | 9  | 3  | 4   | 3  | 353  | 38.6  | 7.94  | 8.4    | 3  | metabolic mitochond     | catalytic a | P00588    | F_79922    | ENSG000001 | MRM1       | 17    | CHR_H                  | rRNA mod               | 4            | 0.894       | 0.282131814 | 16.03       | 381.6       | 426.9   | 7.22    | 11.78   | High  | High | High | High | High | High | 1    |      |   |
| FALSE | High   | Master Pcr F49841-1 | Glyogen s   | 0     | 15.225  | 9  | 2  | 3   | 2  | 420  | 46.7  | 8.78  | 8.16   | 2  | cell differe cytoplasm  | catalytic a | P00606    | F_2932     | ENSG000001 | GSK3B      | 3     | Dopamine H5-Signal     | Regulation             | 124          | 0.894       | 0.392711034 | 24.16       | 634.6       | 710.2   | 11.81   | 10.32   | High  | High | High | High | High | High | 1    |      |   |
| FALSE | High   | Master Pcr Q14914   | Prostaglan  | 0     | 9.54    | 7  | 1  | 1   | 1  | 329  | 35.8  | 8.29  | 6.41   | 1  | metabolic cytoplasm     | catalytic a | P00617    | G_22949    | ENSG000001 | PTGR1      | 9     | NR2 path               | Synthesis c            | 7            | 0.894       | 0.551068341 | 26.54       | 474         | 536.5   | 0.67    | 21.45   | High  | High | High | High | High | High | 1    |      |   |
| FALSE | High   | Master Pcr QBQV4    | Nuclear cl  | 0     | 6.771   | 4  | 1  | 1   | 1  | 516  | 58.4  | 7.49  | 4.74   | 1  | metabolic membrane      | protein bin | P013914   | F_79050    | ENSG000001 | NOC12      | 12    |                        | Major pat              | 5            | 0.894       | 0.68088412  | 56.13       | 48.4        | 54.1    | 29.12   | 23.26   | High  | High | High | High | High | High | 1    |      |   |
| FALSE | High   | Master Pcr P09661   | U2 small n  | 0     | 47.761  | 38 | 9  | 17  | 9  | 255  | 28.4  | 8.62  | 30.49  | 9  | metabolic nucleoscy     | protein bin | P121799   | F_6627     | ENSG000001 | SNRPA1     | 2     | Spliceosom mRNA Pro    | Gene and               | 11           | 0.893       | 0.014369005 | 1.57        | 3178        | 3507.2  | 5.32    | 6.63    | High  | High | High | High | High | High | 1    |      |   |
| FALSE | High   | Master Pcr Q9H12    | 39S riboso  | 0     | 16.022  | 13 | 3  | 4   | 3  | 332  | 37.5  | 8.4   | 15.04  | 3  | metabolic membrane      | catalytic a | P00636    | G_65080    | ENSG000001 | MRPL44     | 2     |                        | Mitochond              | 6            | 0.893       | 0.070606088 | 6.96        | 1176.9      | 1249.1  | 4.29    | 6.79    | High  | High | High | High | High | High | 1    |      |   |
| FALSE | High   | Master Pcr F32119   | Peroxired   | 0     | 63.507  | 51 | 11 | 37  | 10 | 198  | 21.9  | 5.97  | 80.08  | 11 | cell commu cytoplasm    | antioxidan  | P005678   | F_7001     | ENSG000001 | PRDX2      | 1     |                        | Selenium H             | TP53 Regu    | 12          | 0.893       | 0.073414428 | 2.36        | 9503.8  | 11150.5 | 5.06    | 4.24  | High | High | High | High | High | High | 1    |   |
| FALSE | High   | Master Pcr Q9Y388-1 | Oligobion   | 0     | 42.906  | 46 | 9  | 11  | 9  | 237  | 26.8  | 6.87  | 25.19  | 9  | metabolic cytoplasm     | catalytic a | P00929    | G_25996    | ENSG000001 | REK02      | 11    |                        | Ribosome               | 1            | 0.893       | 0.070310777 | 1.64        | 4558.2      | 4949.4  | 2.4     | 3.65    | High  | High | High | High | High | High | 1    |      |   |
| FALSE | High   | Master Pcr F49770   | Translatio  | 0     | 8.531   | 11 | 3  | 3   | 3  | 351  | 39    | 6.16  | 5.76   | 3  | metabolic cytoplasm     | nucleotide  | P01008    | G_8892     | ENSG000001 | EF2R2      | 14    | RNA trans              | Translator             | Recycling c  | 8           | 0.893       | 0.125507066 | 7.66        | 214     | 228.6   | 6.07    | 10.99 | High | High | High | High | High | High | 1    |   |
| FALSE | Medium | Master Pcr P61803   | Dolichyl-d  | 0.034 | 1.374   | 9  | 1  | 1   | 1  | 113  | 12.5  | 7.08  | 0      | 1  | cell death endoplasm    | catalytic a | P01209    | G_1603     | ENSG000001 | DAI1       | 14    | Protein prc            | Asparagin              | 6            | 0.893       | 0.938727284 | 4.61        | 161         | 180.3   | 3.32    | 8.49    | High  | High | High | High | High | High | 1    |      |   |
| FALSE | High   | Master Pcr Q9Y580   | rRNA poly   | 0     | 7.287   | 3  | 3  | 4   | 4  | 961  | 104.3 | 5.27  | 4.94   | 4  | cell division cytoplasm | catalytic a | P00533    | F_9150     | ENSG000001 | CDTP1      | 18    |                        | RNA elonga             | 25           | 0.893       | 0.933666041 | 5.05        | 578.9       | 597.9   | 13.45   | 8.83    | High  | High | High | High | High | High | 1    |      |   |
| FALSE | High   | Master Pcr Q9UR04   | Brain-spec  | 0     | 14.874  | 10 | 4  | 4   | 4  | 511  | 56.8  | 8.68  | 7.01   | 4  | cell organ cytoplasm    | protein bin | P010018   | G_55971    | ENSG000001 | BAIAP211   | 7     |                        |                        | 0            | 0.892       | 0.098688701 | 1.33        | 907.7       | 1017.7  | 5.65    | 9.07    | High  | High | High | High | High | High | 1    |      |   |
| FALSE | High   | Master Pcr P62750   | 60S riboso  | 0     | 65.561  | 54 | 11 | 46  | 11 | 156  | 17.7  | 10.45 | 91.51  | 11 | cell organ cytoplasm    | protein bin | P00276    | F_6147     | ENSG000001 | RP124      | 17    |                        | Ribosome               | Cytoplasm    | Peptide ch  | 34          | 0.892       | 0.095803911 | 2       | 1235.5  | 13426.6 | 4.98  | 1.29 | High | High | High | High | High | High | 1 |
| FALSE | High   | Master Pcr F52943   | Cyteline-e  | 0     | 24.509  | 25 | 2  | 3   | 2  | 208  | 22.5  | 8.72  | 15.38  | 2  | regulation              | metal ion I | P00412    | 1397       | ENSG000001 | CRP23      | 14    |                        |                        | 0            | 0.892       | 0.11447801  | 9.1         | 759.6       | 806.9   | 4.01    | 9.42    | High  | High | High | High | High | High | 1    |      |   |
| FALSE | High   | Master Pcr Q92799   | Ribosomal   | 0     | 18.666  | 18 | 3  | 3   | 3  | 244  | 26.7  | 9.17  | 8.85   | 3  | metabolic cytoplasm     | catalytic a | P01587    | G_10436    | ENSG000001 | ENG1       | 12    | Ribosome               | Major pat              | 6            | 0.892       | 0.246486268 | 14.29       | 756.4       | 909.6   | 11.55   | 10.13   | High  | High | High | High | High | High | 1    |      |   |
| FALSE | High   | Master Pcr P62280   | 40S riboso  | 0     | 48.295  | 53 | 10 | 28  | 10 | 158  | 18.4  | 10.3  | 64.51  | 10 | cell differe cytoplasm  | protein bin | P00366    | G_6205     | ENSG000001 | RPS11      | 19    | Ribosome               | Cytoplasm              | Peptide ch   | 38          | 0.892       | 0.324439667 | 13.24       | 12213.8 | 13700.2 | 1.91    | 10.49 | High | High | High | High | High | High | 1    |   |
| FALSE | High   | Master Pcr Q9H782   | Ribosome    | 0     | 7.676   | 6  | 2  | 3   | 2  | 306  | 35.6  | 9.99  | 4.62   | 2  | cell organ nucleu       | RNA bindi   | P00447    | G_84154    | ENSG000001 | RPF2       | 6     |                        |                        | 0            | 0.892       | 0.408204179 | 11.9        | 176.9       | 198.3   | 10.88   | 4.73    | High  | High | High | High | High | High | 1    |      |   |
| FALSE | High   | Master Pcr P47755   | F-actin-cap | 0     | 38.499  | 40 | 8  | 12  | 6  | 286  | 32.9  | 5.85  | 26.19  | 8  | cell organ cytoskelet   | protein bin | P01267    | G_830      | ENSG000001 | CAFP2A     | 7     | Endocytosi             | COP1-ind               | 22           | 0.892       | 0.505988609 | 17.01       | 699         | 708     | 7.82    | 12.79   | High  | High | High | High | High | High | 1    |      |   |
| FALSE | High   | Master Pcr Q136740  | ATP-deph    | 0     | 25.456  | 27 | 4  | 4   | 4  | 277  | 30.7  | 8.09  | 22.54  | 4  | cell organ mitochond    | catalytic a | P00574    | G_8192     | ENSG000001 | CLP2       | 19    |                        |                        | 0            | 0.892       | 0.567207942 | 36.3        | 2209.9      | 2460.2  | 17.65   | 10.88   | High  | High | High | High | High | High | 1    |      |   |
| FALSE | High   | Master Pcr P62244   | 40S riboso  | 0     | 29.676  | 61 | 9  | 12  | 9  | 130  | 14.8  | 10.13 | 21.14  | 9  | cell organ cytoplasm    | protein bin | P01040    | G_6210     | ENSG000001 | RPS15A     | 16    | Ribosome               | Cytoplasmic Peptide ch | 38           | 0.891       | 0.019713999 | 1.59        | 5950.8      | 6608.3  | 5.5     | 10.5    | High  | High | High | High | High | High | 1    |      |   |
| FALSE | High   | Master Pcr Q62441   | Eukaryotic  | 0     | 37.661  | 26 | 11 | 16  | 11 | 585  | 64.9  | 8.87  | 44.03  | 11 | cell organ cytoplasm    | protein bin | P00862    | G_83939    | ENSG000001 | EF2A       | 3     |                        | Phytodyn               | 2            | 0.891       | 0.045840124 | 5.05        | 3802.1      | 4154.5  | 5.86    | 5.77    | High  | High | High | High | High | High | 1    |      |   |
| FALSE | High   | Master Pcr P83916   | Chromoso    | 0     | 27.55   | 30 | 4  | 7   | 3  | 185  | 21.4  | 49.3  | 13.06  | 4  | regulation chromos      | protein bin | P00385    | F_10951    | ENSG000001 | CBX1       | 17    |                        |                        | 0            | 0.891       | 0.071278653 | 7.91        | 22.8        | 24.2    | 17.17   | 15.11   | High  | High | High | High | High | High | 1    |      |   |
| FALSE | High   | Master Pcr Q00762   | Ubiquitin   | 0     | 14.896  | 23 | 3  | 5   | 3  | 179  | 19.6  | 7.37  | 10.26  | 3  | cell division cytoplasm | catalytic a | P00179    | F_11065    | ENSG000001 | UBC2       | 10    | Ubiquitin n            | Gastric Car            | Inactivation | 39          | 0.891       | 0.103072313 | 8.13        | 2231.7  | 2436.2  | 4.67    | 4.02  | High | High | High | High | High | High | 1    |   |
| FALSE | High   | Master Pcr F49458   | Signal rec  | 0     | 20.798  | 40 | 4  | 9   | 4  | 86   | 10.1  | 7.97  | 14.98  | 4  | cell organ cytoplasm    | protein bin | P005486   | G_6726_653 | ENSG000001 | SRP        | 1     | Protein ext            | SRP-deph               | 4            | 0.891       | 0.281753346 | 19.51       | 4864.3      | 4871.8  | 17.83   | 7.96    | High  | High | High | High | High | High | 1    |      |   |
| FALSE | High   | Master Pcr QGNR12-1 | PDZ and I   | 0     | 10.178  | 7  | 3  | 6   | 3  | 457  | 49.8  | 8.41  | 11.54  | 3  | cell differe cytoplasm  | metal ion I | P00412    | G_9260     | ENSG000001 | POLM17     | 5     | EBV LMP1               | RET sign               | 4            | 0.891       | 0.957789027 | 26.86       | 1734.4      | 1946.9  | 25.85   | 5.41    | High  | High | High | High | High | High | 1    |      |   |
| FALSE | High   | Master Pcr Q96F06   |             |       |         |    |    |     |    |      |       |       |        |    |                         |             |           |            |            |            |       |                        |                        |              |             |             |             |             |         |         |         |       |      |      |      |      |      |      |      |   |

|       |        |            |          |             |       |         |    |    |     |    |      |       |       |        |    |                                   |                        |             |            |            |            |                       |                     |                    |             |             |             |             |             |         |         |        |       |       |      |      |      |      |      |      |      |      |      |      |   |
|-------|--------|------------|----------|-------------|-------|---------|----|----|-----|----|------|-------|-------|--------|----|-----------------------------------|------------------------|-------------|------------|------------|------------|-----------------------|---------------------|--------------------|-------------|-------------|-------------|-------------|-------------|---------|---------|--------|-------|-------|------|------|------|------|------|------|------|------|------|------|---|
| FALSE | High   | Master Prq | P04844-1 | Dolichyl-di | 0     | 101.079 | 38 | 13 | 21  | 13 | 631  | 69.2  | 5.69  | 81.01  | 13 | metabolic; endoplasmic reticulum  | protein bi             | P05817      | 6185       | ENSG000001 | RPN2       | 20                    | Protein pr          | Proteasom          | Asparagin   | 9           | 0.881       | 0.446492142 | 31.36       | 5108.9  | 5695.2  | 18.04  | 9.41  | High  | High | High | High | High | High | High | High | 1    |      |      |   |
| FALSE | High   | Master Prq | Q18N129  | Protein cat | 0     | 5.098   | 8  | 1  | 1   | 1  | 248  | 28.3  | 4.64  | 4.35   | 1  | regulation                        | cytosol                | protein bi  | P11938     | 245812     | ENSG000001 | CNPY4                 | 7                   |                    |             |             | 0           | 0.881       | 0.503583029 | 62.1    | 19.8    | 25.8   | 70.28 | 44.2  | High | 1    |      |   |
| FALSE | High   | Master Prq | Q75937   | Dnal hom    | 0     | 30.173  | 23 | 6  | 10  | 6  | 253  | 29.8  | 9.06  | 20.51  | 6  | metabolic; cytosol                | nu                     | protein bi  | P00226     | 22826      | ENSG000001 | DNAIC8                | 1                   | mRNA Pro           | mRNA Spli   | 5           | 0.88        | 0.1621498   | 13.69       | 3158.6  | 3587.7  | 9.55   | 2.24  | High  | High | High | High | High | High | High | High | 1    |      |      |   |
| FALSE | High   | Master Prq | Q96055   | Transcript  | 0     | 6.794   | 5  | 1  | 1   | 1  | 360  | 41.7  | 9.32  | 4.69   | 1  | cell organ                        | mitochond              | catalytic a | P12836     | 79736      | ENSG000001 | TFT1                  | 17                  |                    |             | 0           | 0.88        | 0.224797593 | 13.79       | 88.3    | 100.3   | 18.18  | 1.48  | High  | High | High | High | High | High | High | High | 1    |      |      |   |
| FALSE | High   | Master Prq | Q96286   | NAD-depe    | 0     | 18.435  | 9  | 6  | 7   | 6  | 747  | 81.6  | 4.67  | 11.2   | 6  | cell comm                         | chromoso               | catalytic a | P02146     | 23411      | ENSG000001 | SERF                  | 10                  | MicroRNA; Androgen | SIRT1 nega  | 26          | 0.88        | 0.330563803 | 18.08       | 1073.5  | 1646.5  | 30.2   | 24.47 | High  | High | High | High | High | High | High | High | 1    |      |      |   |
| FALSE | High   | Master Prq | Q96766   | ubiquitin c | 0     | 19.769  | 5  | 5  | 5   | 5  | 1375 | 157.2 | 5.08  | 10.02  | 5  | metabolic; cytoplasm              | catalytic a            | P00443      | 55031      | ENSG000001 | USP47      | 11                    |                     |                    | Ub-specific | 4           | 0.88        | 0.881026495 | 28.1        | 263.8   | 299.8   | 22.34  | 10.74 | High  | High | High | High | High | High | High | High | 1    |      |      |   |
| FALSE | High   | Master Prq | Q96766   | protein arg | 0     | 57.133  | 40 | 12 | 17  | 12 | 361  | 41.5  | 54.3  | 55.88  | 12 | cell organ                        | cytoplasm; catalytic a | P05175      | 3276       | ENSG000001 | PRMT1      | 19                    | FoxO signa          | Energy Me          | 17          | 0.88        | 0.90681456  | 4.65        | 5563.3      | 5951.9  | 18.65   | 5.36   | High  | High  | High | High | High | High | High | High | 1    |      |      |      |   |
| FALSE | High   | Master Prq | Q46783   | 40S riboso  | 0     | 50.487  | 53 | 12 | 47  | 11 | 165  | 18.9  | 10.15 | 71.54  | 12 | cell organ                        | cytoplasm; protein bi  | P03051      | 6204       | ENSG000001 | RP510      | 6                     | Ribosome            | Cytoplasm          | Peptide ch  | 38          | 0.879       | 0.023464425 | 1.52        | 15171.8 | 17440.5 | 3.96   | 6.22  | High  | High | High | High | High | High | High | High | 1    |      |      |   |
| FALSE | High   | Master Prq | Q13408   | Cytoskele   | 0     | 8.54    | 1  | 2  | 4   | 2  | 2032 | 22.4  | 7.8   | 7.58   | 2  | cell divisio                      | chromoso               | protein bi  | P12348     | 9783       | ENSG000001 | OXAP5                 | 11                  |                    |             | Regulation  | 28          | 0.879       | 0.037754293 | 6.21    | 1338    | 1585.2 | 12.03 | 8.94  | High | 1    |      |   |
| FALSE | High   | Master Prq | Q60900   | Proteasom   | 0     | 88.587  | 60 | 14 | 45  | 14 | 246  | 27.4  | 6.76  | 105.17 | 14 | metabolic; cytoplasm; catalytic a | P00227                 | 5687        | ENSG000001 | PSMA6      | 14         | Proteasom             | Proteasom           | Regulation         | 150         | 0.879       | 0.130004718 | 10.9        | 11682.7     | 13294.9 | 8.52    | 2.14   | High  | High  | High | High | High | High | High | High | High | 1    |      |      |   |
| FALSE | Medium | Master Prq | Q19477   | ribokinase  | 0.015 | 1.754   | 2  | 1  | 1   | 1  | 322  | 34.1  | 5.05  | 0      | 1  | metabolic; cytoplasm; catalytic a | P00294                 | 64080       | ENSG000001 | RBK5       | 2          | Pentose ph            | Pentose ph          | 4                  | 0.879       | 0.195608084 | 9.91        | 69.8        | 83.5        | 9.97    | 9.35    | High   | High  | High  | High | High | High | High | High | High | 1    |      |      |      |   |
| FALSE | High   | Master Prq | Q10181   | Splicing fa | 0     | 32.64   | 31 | 6  | 14  | 6  | 240  | 27.9  | 8.81  | 37.43  | 6  | metabolic; nucleus;spi            | metal ion              | P00076      | 7307; 102  | ENSG000001 | U2AF1; LO  | 21                    | Shigellos; mRNA Pro | Cleavage o         | 14          | 0.879       | 0.501517434 | 7.73        | 3041.1      | 3155.6  | 8.75    | 10.31  | High  | High  | High | High | High | High | High | High | High | High | 1    |      |   |
| FALSE | High   | Master Prq | Q45974-1 | Ubiquitin c | 0     | 17.322  | 7  | 6  | 7   | 6  | 858  | 95.7  | 5.03  | 11.98  | 6  | metabolic; cytosol:vai            | catalytic a            | P00443      | 78078      | ENSG000001 | USP5       | 12                    |                     |                    | Synthesis c | 6           | 0.878       | 0.018128712 | 3.7         | 2879.3  | 3282.6  | 5.02   | 5.28  | High  | High | High | High | High | High | High | High | High | High | 1    |   |
| FALSE | High   | Master Prq | Q05639   | Elongation  | 0     | 216.024 | 54 | 24 | 134 | 12 | 463  | 50.4  | 9.03  | 325.4  | 24 | metabolic; cytoplasm; catalytic a | P00009                 | 1917        | ENSG000001 | EEF1A2     | 20         | Legionello            | Translatio          | Eukaryotic         | 6           | 0.878       | 0.064742723 | 4.31        | 11879.3     | 13533.5 | 2.58    | 4.64   | High  | High  | High | High | High | High | High | High | High | High | 1    |      |   |
| FALSE | High   | Master Prq | Q52888   | thimet olig | 0     | 31.174  | 14 | 8  | 11  | 8  | 689  | 78.8  | 6.05  | 21.74  | 8  | metabolic; cytoplasm; catalytic a | P01432                 | 7064        | ENSG000001 | THOP1      | 19         | Renin-angi            | Antigen pr          | 6                  | 0.878       | 0.140605809 | 12.04       | 1618.1      | 1884.7      | 2.1     | 8.04    | High   | High  | High  | High | High | High | High | High | High | High | 1    |      |      |   |
| FALSE | High   | Master Prq | Q96H51-1 | Serine/thr  | 0     | 7.515   | 7  | 2  | 4   | 2  | 289  | 32    | 8.68  | 3.9    | 2  | cell comm                         | membrane               | catalytic a | P00300     | 192111     | ENSG000001 | PGAM5                 | 12                  | TNF signa          |             | 1           | 0.878       | 0.147424334 | 7.54        | 2253.5  | 2565.3  | 4.68   | 3.56  | High  | High | High | High | High | High | High | High | High | 1    |      |   |
| FALSE | High   | Master Prq | Q15833-1 | Syntaxin-b  | 0     | 13.127  | 6  | 3  | 3   | 3  | 593  | 66.4  | 5.55  | 9.35   | 3  | regulation                        | cytosol:ext            | protein bi  | P00995     | 6813       | ENSG000001 | STXBP2                | 19                  | Insulin Sig        | Platelet de | 9           | 0.878       | 0.157593743 | 1.97        | 900.8   | 1006    | 7.86   | 1.87  | High  | High | High | High | High | High | High | High | High | High | 1    |   |
| FALSE | High   | Master Prq | Q18Y51   | Peptidase   | 0.006 | 2.446   | 2  | 1  | 1   | 1  | 436  | 47.7  | 5.85  | 2.46   | 1  | metabolic; cytosol                | catalytic a            | P01546      | 135293     | ENSG000001 | PM2002     | 6                     |                     |                    |             | 0           | 0.878       | 0.160455091 | 12.21       | 327.1   | 373.6   | 3.92   | 6.68  | High  | High | High | High | High | High | High | High | High | 1    |      |   |
| FALSE | High   | Master Prq | Q9NY26   | Zinc transp | 0     | 4.991   | 4  | 1  | 1   | 1  | 324  | 34.2  | 5.92  | 2.04   | 1  | transport                         | endoplasm              | protein bi  | P02335     | 27173      | ENSG000001 | SLC3A1                | 9                   | NRF2 path          | Zinc infl   | 9           | 0.878       | 0.289537667 | 5.56        | 368.8   | 435.6   | 24.15  | 16.78 | High  | High | High | High | High | High | High | High | High | High | 1    |   |
| FALSE | High   | Master Prq | Q50579   | methionin   | 0     | 36.007  | 19 | 7  | 13  | 7  | 478  | 52.9  | 5.82  | 39.59  | 7  | metabolic; cytoplasm; catalytic a | P00557                 | 10988       | ENSG000001 | METAP2     | 12         |                       |                     | Signaling b        | 5           | 0.878       | 0.379427303 | 25.4        | 1680.9      | 1914.8  | 12.21   | 5.92   | High  | High  | High | High | High | High | High | High | High | High | 1    |      |   |
| FALSE | High   | Master Prq | Q96572   | protein IW  | 0     | 21.332  | 7  | 5  | 5   | 5  | 819  | 91.9  | 4.69  | 10.49  | 5  | metabolic; nucleus                | DNA bindi              | P05297      | 55677      | ENSG000001 | IWS1       | 2                     |                     |                    | Formation   | 5           | 0.877       | 0.009135963 | 0.51        | 690     | 796.4   | 8.07   | 8.87  | High  | High | High | High | High | High | High | High | High | 1    |      |   |
| FALSE | High   | Master Prq | Q9JIA5-1 | tRNA (ade)  | 0     | 12.132  | 9  | 3  | 3   | 3  | 497  | 55.8  | 7.55  | 8.93   | 3  | metabolic; nucleus                | RNA bindi              | P04189      | 51605      | ENSG000001 | LMF2       | 20                    |                     |                    | tRNA mod    | 3           | 0.877       | 0.19894515  | 16.94       | 102.3   | 110.6   | 13.67  | 3.11  | High  | High | High | High | High | High | High | High | High | High | 1    |   |
| FALSE | High   | Master Prq | Q92621   | Nuclear pc  | 0     | 56.476  | 8  | 15 | 18  | 15 | 2012 | 227.8 | 6.19  | 29.63  | 15 | cell organ                        | membrane               | protein bi  | P11894     | 23165      | ENSG000001 | NUP205                | 7                   | RNA trans          | Rev-media   | 64          | 0.877       | 0.524461588 | 10.17       | 1442    | 1645.1  | 27.71  | 12.55 | High  | High | High | High | High | High | High | High | High | High | 1    |   |
| FALSE | High   | Master Prq | Q9BWX9   | Selenoact   | 0     | 10.505  | 19 | 2  | 2   | 2  | 145  | 16.2  | 5.54  | 6.78   | 2  | metabolic; cytoplasm; protein bi  | P08806                 | 140606      | ENSG000001 | SELM; SELI | 22         |                       |                     | Selenium I         | 2           | 0.877       | 0.560820081 | 52.9        | 299.7       | 358     | 28.32   | 27.77  | High  | High  | High | High | High | High | High | High | High | High | 1    |      |   |
| FALSE | High   | Master Prq | Q96005-1 | Cleft lip a | 0     | 5.659   | 3  | 2  | 2   | 2  | 669  | 76    | 6.3   | 1.97   | 2  | cell differe                      | membrane               | protein bi  | P05602     | 1209       | ENSG000001 | CLPTM1                | 19                  |                    |             |             | 0           | 0.877       | 0.692476931 | 34.32   | 724.6   | 902.1  | 34.22 | 9.5   | High | 1    |   |
| FALSE | High   | Master Prq | Q99460   | 26S prote   | 0     | 54.793  | 21 | 13 | 17  | 13 | 953  | 105.8 | 6.39  | 35.59  | 13 | metabolic; cytosol:ext            | catalytic a            | P01851      | 5707       | ENSG000001 | PM2005     | 12                    | Epstein-Ba          | Proteasom          | Regulation  | 153         | 0.876       | 0.071959369 | 7.97        | 2472.4  | 2821.4  | 2.99   | 8.71  | High  | High | High | High | High | High | High | High | High | High | 1    |   |
| FALSE | High   | Master Prq | Q62854   | 40S riboso  | 0     | 27.452  | 37 | 4  | 10  | 4  | 115  | 13    | 11    | 16.03  | 4  | cell organ                        | cytosol:me             | protein bi  | P01283     | 6231; 101  | ENSG000001 | RP52; LO1; LO2; 20; 4 |                     | Ribosome           | Cytoplasm   | Peptide ch  | 38          | 0.876       | 0.339428233 | 11.54   | 2784.2  | 3180.6 | 7.18  | 42.45 | High | 1 |
| FALSE | High   | Master Prq | Q9UGP4   | LM domai    | 0     | 6.465   | 4  | 1  | 1   | 1  | 676  | 72.1  | 6.65  | 3.63   | 1  | cell organ                        | cytosol; metal ion     | P00412      | 8994       | ENSG000001 | LSMD1      | 3                     | Hippo sign          |                    | 7           | 0.876       | 0.386340071 | 20.14       | 159.6       | 182.3   | 11.56   | 5.38   | High  | High  | High | High | High | High | High | High | High | High | 1    |      |   |
| FALSE | High   | Master Prq | Q97546   | Calcium-bi  | 0     | 19.879  | 6  | 3  | 6   | 1  | 678  | 74.7  | 8.38  | 16.26  | 3  | metabolic; membrane               | metal ion              | P00153      | 8604       | ENSG000001 | SLC2A12    | 2                     |                     |                    | Gluccone    | 6           | 0.876       | 0.42699645  | 29.77       | 233.3   | 266.5   | 15.54  | 5.54  | High  | High | High | High | High | High | High | High | High | High | 1    |   |
| FALSE | High   | Master Prq | Q9BUH6   | Protein PA  | 0     | 22.93   | 30 | 4  | 4   | 4  | 204  | 21.6  | 5.48  | 17.77  | 4  | metabolic; nucleus                | protein bi             | P115384     | 286257     | ENSG000001 | COrf142    | 9                     |                     |                    |             | 0           | 0.876       | 0.622066379 | 25.11       | 445.5   | 508.6   | 57.06  | 8.92  | High  | High | High | High | High | High | High | High | High | High | 1    |   |
| FALSE | High   | Master Prq | Q9NIU7   | ATP-dep     | 0     | 38.682  | 23 | 8  | 8   | 8  | 478  | 53.9  | 6.58  | 23.44  | 8  | metabolic; cytoplasm; catalytic a | P00270                 | 55308       | ENSG000001 | DDX19A     | 16         |                       |                     |                    | 0           | 0.876       | 0.814087767 | 15.36       | 1091.5      | 1218.5  | 20.08   | 4.51   | High  | High  | High | High | High | High | High | High | High | High | 1    |      |   |
| FALSE | High   | Master Prq | Q9ULW3   | activator c | 0.003 | 3.273   | 10 | 1  | 1   | 1  | 272  | 31.1  | 9.88  | 2.58   | 1  | cell differe                      | nucleus                | DNA bindi   | P14259     | 29777      | ENSG000001 | ABT1                  | 6                   |                    |             |             | 0           | 0.876       | 0.838113354 | 18.76   | 296.4   | 282.7  | 29.49 | 11.22 | High | 1 |
| FALSE | High   | Master Prq | Q49381   | T-complex   | 0     | 197.659 | 58 | 33 | 91  | 33 | 545  | 60.5  | 6.49  | 219.99 | 33 | cell organ                        | cytoplasm; nucleotide  | P00118      | 7203       | ENSG000001 | CTC3       | 1                     |                     |                    | BBSome-r    | 13          | 0.875       | 0.109696819 | 1.95        | 30105.3 | 33824.7 | 5.08   | 1.89  | High  | High | High | High | High | High | High | High | High | High | 1    |   |
| FALSE | High   | Master Prq | Q32969   | 60S riboso  | 0     | 40.484  | 52 | 9  | 23  | 9  | 192  | 21.9  | 9.95  | 39.96  | 9  | cell organ                        | cytoplasm; protein bi  | P00347      | 6133       | ENSG000001 | ALM49      | 4                     | Ribosome            | Cytoplasm          | Peptide ch  | 34          | 0.875       | 0.186021672 | 15.96       | 5804.9  | 6632.7  | 8.88   | 2.66  | High  | High | High | High | High | High | High | High | High | High | 1    |   |
| FALSE | High   | Master Prq | Q49748-1 | Very long-  | 0     | 162.981 | 45 | 24 | 58  | 24 | 655  | 70.3  | 8.75  | 120.55 | 24 | cell differe                      | cytosol:me             | catalytic a | P00441     | 4737       | ENSG000001 | ACADVL                | 17                  | Metabolic          | Fatty Acid  | Beta oxid   | 15          | 0.875       | 0.250784313 | 18.77   |         |        |       |       |      |      |      |      |      |      |      |      |      |      |   |

[illegible]



|       |      |                     |             |       |         |    |    |    |    |      |       |       |        |    |              |             |             |         |         |           |         |     |             |             |             |             |             |             |             |         |         |        |       |      |      |      |      |      |      |      |      |   |
|-------|------|---------------------|-------------|-------|---------|----|----|----|----|------|-------|-------|--------|----|--------------|-------------|-------------|---------|---------|-----------|---------|-----|-------------|-------------|-------------|-------------|-------------|-------------|-------------|---------|---------|--------|-------|------|------|------|------|------|------|------|------|---|
| FALSE | High | Master Prc Q53H12   | Acylglyceri | 0     | 13.613  | 13 | 4  | 5  | 4  | 422  | 47.1  | 8.09  | 7.43   | 4  | cell organ   | cytosol:met | catalytic a | P000781 | 55750   | ENSG00000 | AGK     | 7   | Glycerolip  |             | Signaling b | 10          | 0.836       | 0.122546648 | 5.61        | 425.8   | 555.2   | 8.04   | 13.33 | High | 1    |   |
| FALSE | High | Master Prc Q98067   | Glutamate   | 0     | 17.992  | 9  | 3  | 6  | 3  | 446  | 49.4  | 4.92  | 14.19  | 3  | cell organ   | chromoso    | DNA bindi   | P00400  | 83743   | ENSG00000 | GRWD1   | 19  |             |             |             | 0           | 0.836       | 0.254638118 | 10.78       | 1491.3  | 1766.7  | 11.25  | 3.65  | High | 1    |   |
| FALSE | High | Master Prc Q9BX40   | protein L5F | 0     | 20.838  | 15 | 2  | 2  | 2  | 385  | 42    | 9.69  | 14.03  | 2  | developm     |             | RNA bindi   | P09532  | 149986  | ENSG00000 | SLM148  | 20  |             |             | 0           | 0.836       | 0.297609116 | 11.73       | 373.8       | 387.2   | 13.71   | 14.74  | High  | High | High | High | High | High | High | 1    |      |   |
| FALSE | High | Master Prc Q9W176   | alcohol de  | 0     | 24.347  | 14 | 6  | 8  | 6  | 374  | 39.7  | 7.49  | 18.65  | 6  | metabolic    | cytoplasm   | catalytic a | P00007  | 128     | ENSG00000 | ADHS    | 4   | Metabolis   | Folate-Ac   | Ethanol ox  | 15          | 0.835       | 0.009090969 | 4.32        | 206.3   | 244.4   | 1.41   | 2.41  | High | 1    |   |
| FALSE | High | Master Prc Q96555-1 | ATPase WI   | 0     | 26.454  | 9  | 4  | 6  | 4  | 665  | 72.1  | 6.1   | 15.17  | 4  | metabolic    | membrane    | catalytic a | P00004  | 56897   | ENSG00000 | WNRP1   | 6   |             |             | 0           | 0.835       | 0.230065108 | 23.68       | 848.8       | 1018    | 20.4    | 12.61  | High  | High | High | High | High | High | High | 1    |      |   |
| FALSE | High | Master Prc Q9H443   | Serine/thr  | 0     | 6.569   | 1  | 2  | 2  | 2  | 2382 | 250.6 | 6.34  | 4.21   | 2  | metabolic    | cytoplasm   | catalytic a | P00069  | 65125   | ENSG00000 | WNK1    | 12  |             | Stimuli-ser | 3           | 0.835       | 0.33101191  | 32.34       | 310.1       | 361     | 72.6    | 6.45   | High  | High | High | High | High | High | High | 1    |      |   |
| FALSE | High | Master Prc Q42064   | Isomorf 4   | 0     | 32.702  | 7  | 7  | 8  | 7  | 1477 | 163   | 8.53  | 5.66   | 7  | cell divisi  | chromoso    | protein bi  | P03985  | 73332   | ENSG00000 | CLASP1  | 2   |             | Regulation  | 1           | 0.835       | 0.739204847 | 5.78        | 2271.1      | 2568.6  | 44.11   | 3.6    | High  | High | High | High | High | High | High | 1    |      |   |
| FALSE | High | Master Prc Q60271   | C-jun-ami   | 0     | 10.046  | 4  | 3  | 3  | 3  | 1321 | 146.1 | 5.15  | 2.68   | 3  | cell differe | cytoplasm   | protein bi  | P09744  | 9043    | ENSG00000 | IPAG9   | 17  |             | COO in my   | 3           | 0.834       | 0.016098348 | 5.57        | 318.6       | 388.3   | 6.41    | 2.26   | High  | High | High | High | High | High | High | 1    |      |   |
| FALSE | High | Master Prc Q9Y6D9   | mitotic spi | 0     | 19.805  | 9  | 5  | 5  | 5  | 718  | 83    | 5.92  | 10.05  | 5  | cell divisio | chromoso    | protein bi  | P05557  | 8379    | ENSG00000 | MAD1L1  | 7   | Progester   | Cell Cycle  | Amplificat  | 20          | 0.834       | 0.0164638   | 4.33        | 909.4   | 1090.3  | 3.2    | 6.45  | High | 1    |   |
| FALSE | High | Master Prc P61619   | Protein tra | 0     | 18.483  | 13 | 6  | 9  | 6  | 476  | 52.2  | 8.06  | 17.54  | 6  | cell growth  | cytosol:eni | protein bi  | P00344  | 29927   | ENSG00000 | SEC61A1 | 3   | Vibrio chol | ER-Phagoc   | Ion transp  | 15          | 0.834       | 0.149834894 | 7           | 269.5   | 361.2   | 12.78  | 12.3  | High | 1    |   |
| FALSE | High | Master Prc Q9NTM9   | Copper ho   | 0.003 | 3.118   | 4  | 1  | 1  | 1  | 273  | 29.3  | 8.18  | 2.22   | 1  | cell organ   | cytoplasm   | metal ion   | P03932  | 51076   | ENSG00000 | CUTC    | 10  |             | Ion transp  | 3           | 0.834       | 0.413707786 | 16.42       | 882.6       | 1019    | 22.6    | 5.74   | High  | High | High | High | High | High | High | 1    |      |   |
| FALSE | High | Master Prc P15328   | Folate rec  | 0     | 58.803  | 37 | 9  | 33 | 9  | 257  | 29.8  | 7.97  | 92.8   | 9  | cell comm    | cell surfac | receptor a  | P03024  | 2348    | ENSG00000 | FORL1   | 11  | Antifolate  | Folate Met  | COPI-medi   | 13          | 0.833       | 0.245527256 | 5           | 11285.4 | 12810.6 | 4.36   | 10.61 | High | 1    |   |
| FALSE | High | Master Prc P40121   | Macrophia   | 0     | 66.737  | 34 | 9  | 19 | 9  | 348  | 38.5  | 6.19  | 49.57  | 9  | cell organ   | cytoplasm   | protein bi  | P00626  | 822     | ENSG00000 | CAPG    | 2   |             | TYROBP Ca   | 1           | 0.833       | 0.343992498 | 17.79       | 2753.6      | 3484.1  | 19.34   | 3.69   | High  | High | High | High | High | High | High | 1    |      |   |
| FALSE | High | Master Prc Q885Q4   | Adhesion c  | 0.002 | 4.019   | 2  | 1  | 1  | 1  | 1221 | 136.6 | 7.87  | 1.66   | 1  | cell differe | membrane    | protein bi  | P00002  | 57211   | ENSG00000 | GPR126  | A 6 |             |             | 0           | 0.833       | 0.352248152 | 34          | 15.9        | 19.5    | 5.14    | 31.47  | High  | High | High | High | High | High | High | 1    |      |   |
| FALSE | High | Master Prc P43490   | nicotinin   | 0     | 13.881  | 10 | 3  | 3  | 3  | 491  | 55.5  | 7.15  | 12.55  | 3  | cell comm    | cytoplasm   | catalytic a | P04095  | 10135   | ENSG00000 | NAMPT   | 7   | Nicotinate  | Adipogene   | BMAL1:Cl    | 14          | 0.833       | 0.458840002 | 50.38       | 245.9   | 328.9   | 20.2   | 29.01 | High | 1    |   |
| FALSE | High | Master Prc P55211-1 | caspace-9   | 0     | 11.037  | 9  | 2  | 3  | 2  | 416  | 46.3  | 6.05  | 5.51   | 2  | cell death   | cytoplasm   | catalytic a | P00619  | F 842   | ENSG00000 | CASP9   | 1   | Parkinso    | Nucleotide  | AKT phosph  | 68          | 0.833       | 0.497119888 | 9.01        | 450.2   | 517.3   | 19.46  | 2.9   | High | 1    |   |
| FALSE | High | Master Prc Q14653-1 | Golgi SNAF  | 0     | 13.18   | 22 | 3  | 3  | 3  | 212  | 24.8  | 8.06  | 5.61   | 3  | cell organ   | cytosol:eni | protein bi  | P12352  | 9570    | ENSG00000 | GOSR2   | 17  |             | SNARE int   | 16          | 0.832       | 0.361621896 | 8.36        | 40.1        | 47.8    | 6.76    | 17.37  | High  | High | High | High | High | High | High | 1    |      |   |
| FALSE | High | Master Prc P37198   | nuclear po  | 0     | 9.907   | 6  | 3  | 3  | 3  | 522  | 53.2  | 5.31  | 8.31   | 3  | cell death   | cytoplasm   | protein bi  | P05064  | 23636   | ENSG00000 | NUP62   | 19  | RNA trans   | Rev-medi    | 64          | 0.832       | 0.386265113 | 38.94       | 374.3       | 431.3   | 25.98   | 14.84  | High  | High | High | High | High | High | High | 1    |      |   |
| FALSE | High | Master Prc Q96JP2   | Unconvect   | 0.002 | 4       | 1  | 1  | 1  | 1  | 1530 | 167   | 4.81  | 3.25   | 1  | cytoplasm    | catalytic a | P00063      | F 80022 |         | LOC10313  | 17      |     |             | 0           | 0.832       | 0.389088083 | 40.08       | 274.9       | 348.9       | 13.26   | 20.77   | High   | High  | High | High | High | High | High | 1    |      |      |   |
| FALSE | High | Master Prc P31946   | 14-3-3 pro  | 0     | 111.212 | 58 | 15 | 60 | 6  | 246  | 28.1  | 4.83  | 120.32 | 15 | cell organ   | cytoplasm   | protein bi  | P00244  | 7529    | ENSG00000 | YWHAB   | 20  | Hippo sign  | Cell Cycle  | MAP2K an    | 68          | 0.831       | 0.138441114 | 1.69        | 3747.2  | 4333.7  | 3.71   | 9.16  | High | 1    |   |
| FALSE | High | Master Prc Q9U03-1  | Vacuolar p  | 0     | 9.218   | 3  | 1  | 1  | 1  | 782  | 86    | 6.47  | 5.02   | 1  | cell organ   | cytosol:eni | protein bi  | P04124  | F 738   | ENSG00000 | VP551   | 11  |             | Retrogredi  | 4           | 0.831       | 0.50423883  | 53.24       | 254.6       | 321.5   | 21.76   | 26.45  | High  | High | High | High | High | High | High | 1    |      |   |
| FALSE | High | Master Prc Q9ADA7-1 | Ubiquitin-i | 0     | 19.544  | 8  | 8  | 9  | 8  | 1052 | 117.9 | 6.14  | 10.02  | 8  | metabolic    | cytoplasm   | catalytic a | P00899  | F 55236 | ENSG00000 | UBAA6   | 4   | Ubiquitin r | Synthesi c  | 9           | 0.831       | 0.75491019  | 3.33        | 1546.8      | 1888.5  | 44.49   | 2.97   | High  | High | High | High | High | High | High | 1    |      |   |
| FALSE | High | Master Prc P62910   | 60S riboso  | 0     | 64.331  | 52 | 11 | 38 | 11 | 135  | 15.9  | 11.33 | 9.7    | 11 | cell organ   | cytosol:me  | RNA bindi   | P01655  | 6161    | ENSG00000 | RLP32   | 3   | Ribosome    | Cytoplasm   | Peptide ch  | 34          | 0.833       | 0.033162028 | 3.95        | 12664   | 14236.1 | 8.17   | 5.6   | High | 1    |   |
| FALSE | High | Master Prc Q92P75   | Ubiquitin c | 0     | 16.716  | 4  | 3  | 5  | 5  | 1121 | 122.6 | 9.67  | 10.77  | 3  | metabolic    | nucleus     | catalytic a | P00443  | F 57602 |           | USP96   | 17  |             |             | 0           | 0.83        | 0.060573681 | 6.15        | 357.4       | 446.4   | 13.88   | 8.99   | High  | High | High | High | High | High | High | 1    |      |   |
| FALSE | High | Master Prc Q06869-1 | Endothelia  | 0     | 11.88   | 27 | 4  | 7  | 4  | 148  | 16.4  | 9.95  | 12.58  | 4  | cell differe | cytoplasm   | catalytic a | P01381  | F 8721  | ENSG00000 | CDP5    | 9   |             |             | 0           | 0.83        | 0.673300504 | 6.89        | 1805.4      | 2164    | 13.59   | 10.79  | High  | High | High | High | High | High | High | 1    |      |   |
| FALSE | High | Master Prc Q9GZ21-1 | N-alpha-ac  | 0     | 45.413  | 53 | 10 | 13 | 10 | 169  | 19.4  | 8.81  | 28.92  | 10 | cell organ   | cytoplasm   | catalytic a | P00583  | F 80218 | ENSG00000 | NAASO   | 3   | Metapathw   |             | 1           | 0.83        | 0.890373695 | 20.28       | 1280.5      | 1444    | 34.51   | 5.93   | High  | High | High | High | High | High | High | 1    |      |   |
| FALSE | High | Master Prc Q07866-1 | Kinesin liq | 0     | 8.946   | 5  | 3  | 4  | 1  | 573  | 65.3  | 6.2   | 8.99   | 3  | cell organ   | cytoplasm   | catalytic a | P08317  | F 3831  | ENSG00000 | KLC1    | 14  | Salmonella  | COPI-depe   | 16          | 0.829       | 0.070264592 | 12.61       | 174.8       | 227     | 9.68    | 5.15   | High  | High | High | High | High | High | High | 1    |      |   |
| FALSE | High | Master Prc Q96066   | RNA pseu    | 0     | 8.64    | 7  | 3  | 3  | 3  | 427  | 47.4  | 8.41  | 3.56   | 3  | cell organ   | mitochond   | catalytic a | P01416  | 80324   | ENSG00000 | PUS1    | 12  |             | tRNA mod    | 3           | 0.829       | 0.132067583 | 7.4         | 1104.5      | 1398.8  | 14.21   | 4.47   | High  | High | High | High | High | High | High | 1    |      |   |
| FALSE | High | Master Prc Q76094   | Signal rec  | 0     | 43.497  | 16 | 8  | 11 | 8  | 671  | 74.6  | 9.26  | 31.84  | 8  | cell organ   | cytoplasm   | protein bi  | P08492  | F 6731  | ENSG00000 | SRP72   | 4   | Protein exp | SRP-depen   | 4           | 0.829       | 0.176866871 | 0.41        | 2888.3      | 3510    | 1.82    | 22.99  | High  | High | High | High | High | High | High | 1    |      |   |
| FALSE | High | Master Prc P03001   | Ras-relate  | 0     | 11.979  | 13 | 2  | 2  | 2  | 218  | 23.5  | 6.95  | 6.84   | 2  | cell differe | membrane    | catalytic a | P00071  | F 6237  | ENSG00000 | RRAS    | 19  | Proteotexy  | G Protein S | SEMAP4 m    | 28          | 0.829       | 0.438644774 | 30.17       | 438.7   | 513.3   | 15.78  | 11.47 | High | 1    |   |
| FALSE | Low  | Master Prc P35125-1 | Ubiquitin c | 0.05  | 1.197   | 1  | 1  | 1  | 1  | 1406 | 158.6 | 7.71  | 2.03   | 1  | metabolic    | cytoplasm   | catalytic a | P00443  | F 9098  | ENSG00000 | USP6    | 17  |             |             | 0           | 0.828       | 0.386302574 | 40.66       | 713.8       | 880.7   | 19.08   | 20.46  | High  | High | High | High | High | High | High | 1    |      |   |
| FALSE | High | Master Prc P49720   | proteasom   | 0     | 22.576  | 24 | 4  | 9  | 4  | 205  | 22.9  | 6.55  | 19.01  | 4  | metabolic    | cytoplasm   | catalytic a | P00227  | 5691    | ENSG00000 | PSMB3   | 17  | CHR_H       | Proteasom   | Proteasom   | Regulation  | 150         | 0.827       | 0.134486788 | 13.08   | 2895.8  | 3502.5 | 18.8  | 1.21 | High | 1 |
| FALSE | High | Master Prc Q9NU15   | Repressor   | 0     | 5.23    | 6  | 1  | 1  | 1  | 291  | 33.1  | 7.25  | 30.8   | 1  | defence re   | cytoplasm   | protein bi  | P15135  | 55337   | ENSG00000 | CIR6196 | 6   |             |             | 0           | 0.827       | 0.387919164 | 39.18       | 238.9       | 270.1   | 21.74   | 12.08  | High  | High | High | High | High | High | High | 1    |      |   |
| FALSE | High | Master Prc Q9Y5X1   | Sorting nei | 0     | 17.825  | 10 | 3  | 3  | 3  | 595  | 66.6  | 5.58  | 10.35  | 3  | cell divisio | cytoplasm   | protein bi  | P15149  | F 51429 | ENSG00000 | SNX9    | 6   |             | Golgi Asso  | 6           | 0.827       | 0.414660083 | 47.97       | 149         | 204.1   | 34.07   | 28.67  | High  | High | High | High | High | High | High | 1    |      |   |
| FALSE | High | Master Prc Q9NR94   | Succinate c | 0     | 6.349   | 25 | 2  | 2  | 2  | 125  | 14.6  | 9.07  | 7.4    | 2  | cell organ   | mitochond   |             | P05347  | F 57001 | ENSG00000 | ACN9    | SDH | 7           |             |             | 0           | 0.827       | 0.595500351 | 19.39       | 94      | 103.5   | 6.77   | 29.84 | High | 1    |   |
| FALSE | High | Master Prc Q9T591   | Small subu  | 0     | 24.461  | 3  | 6  | 8  | 6  | 2785 | 318.2 | 7.39  | 16.1   | 6  | metabolic    | cytoplasm   | protein bi  | P07539  | 27340   | ENSG00000 | UTP20   | 12  |             | Major patf  | 5           | 0.826       | 0.053933416 | 7.73        | 1515.7      | 1840.6  | 11.48   | 9.48   | High  | High | High | High | High | High | High | 1    |      |   |
| FALSE | High | Master Prc P62249   | 40S riboso  | 0     | 51.504  | 72 | 13 | 31 | 13 | 146  | 16.4  | 10.21 | 52.05  | 13 | cell organ   | cytosol:me  | protein bi  | P00380  | 6217    | ENSG00000 | RP516   | 16  | Ribosome    | Cytoplasm   | Peptide ch  | 38          | 0.826       | 0.06101151  | 11.26       | 11018.8 | 13344.9 | 6.23   | 2.36  | High |      |      |      |      |      |      |      |   |

|       |        |                     |             |       |        |    |    |    |    |      |       |       |       |    |                                       |                      |                      |                   |           |             |             |                       |             |             |             |             |         |         |        |       |       |      |      |      |      |      |      |   |
|-------|--------|---------------------|-------------|-------|--------|----|----|----|----|------|-------|-------|-------|----|---------------------------------------|----------------------|----------------------|-------------------|-----------|-------------|-------------|-----------------------|-------------|-------------|-------------|-------------|---------|---------|--------|-------|-------|------|------|------|------|------|------|---|
| FALSE | Medium | Master Prq Q13632-1 | Program     | 0.011 | 2.019  | 3  | 1  | 1  | 1  | 344  | 38.6  | 5.38  | 1.66  | 1  | cell death; cytoplasm; DNA bindi      | P101753, F 5134      | ENSG000001 PCD2      | 6                 |           |             |             |                       |             | 0           | 0.806       | 0.040371787 | 12.94   | 860     | 1067.7 | 18.28 | 8.63  | High | High | High | High | High | High | 1 |
| FALSE | High   | Master Prq Q12965   | uncoment    | 0     | 75.927 | 16 | 13 | 20 | 13 | 1108 | 127   | 8.92  | 56.38 | 13 | cell differ; cytoplasm; catalytic a   | P00018, F 4643       | ENSG000001 MYO1E     | 15                |           | Primary Fo  |             |                       |             | 1           | 0.806       | 0.155375488 | 1.88    | 4513.9  | 5601   | 6.63  | 5.34  | High | High | High | High | High | High | 1 |
| FALSE | High   | Master Prq Q09H5    | Ankyrin re  | 0     | 22.348 | 8  | 4  | 5  | 4  | 726  | 80.9  | 8.41  | 17.48 | 4  | metabolic; cytoplasm; catalytic a     | P000233, F 55139     | ENSG000001 ANKRF1    | 2                 |           |             |             |                       |             | 0           | 0.806       | 0.165906294 | 16.44   | 340.1   | 422    | 8.56  | 7.12  | High | High | High | High | High | High | 1 |
| FALSE | High   | Master Prq Q09532   | Ubiquitin   | 0     | 19.912 | 8  | 4  | 4  | 4  | 703  | 77.9  | 8.24  | 11.02 | 4  | cell comm; cytoplasm; catalytic a     | P00089, 10533        | ENSG000001 ATG7      | 3                 |           | Autophagy   | Nanopartic  | Signaling b           |             | 15          | 0.806       | 0.997022955 | 0.29    | 95.2    | 118.3  | 36.14 | 3.55  | High | High | High | High | High | High | 1 |
| FALSE | High   | Master Prq Q5998    | Actin-relat | 0     | 8.705  | 17 | 3  | 5  | 3  | 168  | 19.7  | 6.43  | 6.62  | 3  | cell organ; cytoplasm; protein bi     | P00586, 10093        | ENSG000001 APC4      | 3                 |           | Shigellosi  | Pathogen    | EBH-m                 | 23          | 0.805       | 0.016594978 | 3.25        | 1276    | 1611.2  | 3.96   | 2.45  | High  | High | High | High | High | High | 1    |   |
| FALSE | High   | Master Prq Q21266   | glutathion  | 0     | 70.253 | 50 | 12 | 24 | 12 | 225  | 26.5  | 5.54  | 65.88 | 12 | metabolic; cytoplasm; catalytic a     | P00043, F 2947       | ENSG000001 GSTM3     | 1                 |           | Drug meta   | NRF2 pat    | Glutathion            | 12          | 0.805       | 0.0509477   | 0.12        | 5974    | 7238.7  | 6.93   | 1.51  | High  | High | High | High | High | High | 1    |   |
| FALSE | High   | Master Prq Q43719   | HIV Tat-sp  | 0     | 17.644 | 9  | 7  | 7  | 7  | 755  | 85.8  | 4.4   | 11.7  | 7  | cell organ; nucleus;sp                | P000828, F 27336     | ENSG000001 HTATSF1   | X                 |           |             |             |                       | 0           | 0.805       | 0.774198691 | 2.87        | 2010.4  | 2344.8  | 46.77  | 5.89  | High  | High | High | High | High | High | 1    |   |
| FALSE | High   | Master Prq Q23230   | cytidine di | 0     | 27.286 | 45 | 5  | 9  | 5  | 146  | 16.2  | 6.92  | 31.7  | 5  | cell organ; cytosol;enl               | P00083, F 978        | ENSG000001 CDA       | 1                 |           | Pyrimidine  | Fluoropyri  | Pyrimidine            | 11          | 0.804       | 0.167700521 | 22.93       | 2517.1  | 3248.5  | 11.12  | 11.88 | High  | High | High | High | High | High | 1    |   |
| FALSE | High   | Master Prq Q08323-3 | GTP-bindir  | 0.002 | 3.898  | 5  | 1  | 1  | 1  | 284  | 32.1  | 9.42  | 2.31  | 1  | membrane; catalytic a                 | P00009, F 29083      | ENSG000001 GTPBP8    | 3                 |           |             |             |                       | 0           | 0.804       | 0.24166406  | 20.15       | 144.1   | 179.4   | 15.67  | 21.01 | High  | High | High | High | High | High | 1    |   |
| FALSE | Medium | Master Prq Q14925   | Mitochond   | 0.026 | 1.481  | 4  | 1  | 2  | 1  | 209  | 21.9  | 8.6   | 3.94  | 1  | transport                             | membrane; protein bi | P02466, 10027933     | ENSG000001 TMEM23 | 10        |             |             | Mitochond             |             | 2           | 0.804       | 0.258452996 | 16.17   | 1030.1  | 1282   | 45.91 | 12.89 | High | High | High | High | High | High | 1 |
| FALSE | High   | Master Prq Q09B78   | transmem    | 0     | 9.066  | 9  | 2  | 4  | 2  | 246  | 26.2  | 5.72  | 4.02  | 2  | metabolic; cytoplasm; protein bi      | P02400, F 83590      | ENSG000001 TMUB1     | 19                |           |             |             |                       | 0           | 0.804       | 0.394893594 | 2.07        | 1630.1  | 1727    | 10.87  | 20.12 | High  | High | High | High | High | High | 1    |   |
| FALSE | High   | Master Prq Q07020   | 60S riboso  | 0     | 37.675 | 42 | 7  | 14 | 7  | 188  | 21.6  | 11.72 | 27.9  | 7  | cell organ; cytoplasm; RNA bindi      | P000828, 6141        | ENSG000001 RPL18     | 7                 |           |             | Ribosome    | Cytoplasm; Peptide ch | 34          | 0.802       | 0.072669139 | 10.59       | 4852.2  | 6036.2  | 4.31   | 6.62  | High  | High | High | High | High | High | 1    |   |
| FALSE | High   | Master Prq Q53609   | Geranylge   | 0.004 | 2.723  | 3  | 1  | 1  | 1  | 377  | 42.3  | 6.83  | 2.1   | 1  | metabolic; cytoplasm; catalytic a     | P00432, F 5229       | ENSG000001 PGGT18    | 5                 |           |             |             |                       | 0           | 0.801       | 0.189704049 | 7.29        | 485.1   | 563.5   | 6.92   | 11.1  | High  | High | High | High | High | High | 1    |   |
| FALSE | High   | Master Prq Q095747  | Serine/thr  | 0     | 14.15  | 8  | 4  | 7  | 4  | 527  | 58    | 6.43  | 13.34 | 4  | metabolic; cytoplasm; catalytic a     | P00069, F 9943       | ENSG000001 OXSR1     | 3                 |           |             |             |                       | 0           | 0.801       | 0.439313214 | 25.54       | 1793.6  | 2237.8  | 17.97  | 10.04 | High  | High | High | High | High | High | 1    |   |
| FALSE | High   | Master Prq Q14744   | Protein arg | 0     | 23.115 | 14 | 7  | 10 | 7  | 637  | 72.6  | 6.29  | 12.71 | 7  | cell organ; cytoplasm; catalytic a    | P02475, F 10419      | ENSG000001 PRMT5     | 14                |           | RNA trans   | snRNP Ass   |                       | 13          | 0.799       | 0.104404727 | 9.42        | 2578.3  | 3154.6  | 22.08  | 4.81  | High  | High | High | High | High | High | 1    |   |
| FALSE | High   | Master Prq Q095P6   | Mannose-    | 0     | 14.349 | 15 | 3  | 4  | 3  | 360  | 39.8  | 6.61  | 12.88 | 3  | metabolic; cytoplasm; catalytic a     | P00132, F 29925      | ENSG000001 GMPBP     | 8                 |           | Metabolic   | Synthesis c |                       | 9           | 0.799       | 0.191673403 | 27.47       | 624.6   | 748.8   | 15.59  | 10.79 | High  | High | High | High | High | High | 1    |   |
| FALSE | High   | Master Prq Q09WT1   | p21-activa  | 0     | 18.722 | 10 | 4  | 5  | 4  | 392  | 43.9  | 8.91  | 17.61 | 4  | cell profile; nucleus                 | protein bi           | P00400, 55003        | ENSG000001 PAK1P1 | 6         |             |             |                       |             | 0           | 0.798       | 0.10153923  | 3.65    | 2461.2  | 3090.3 | 1.16  | 4.34  | High | High | High | High | High | High | 1 |
| FALSE | High   | Master Prq Q0547    | 2-(3-amin   | 0     | 4.727  | 7  | 2  | 2  | 2  | 489  | 52.1  | 5.53  | 1.83  | 2  | metabolic; cytosol                    | catalytic a          | P01866, 1802         | ENSG000001 DHP2   | 1         |             |             | Synthesis c           |             | 4           | 0.796       | 0.042554528 | 9.53    | 41.6    | 49.1   | 12.56 | 14.47 | High | High | High | High | High | High | 1 |
| FALSE | High   | Master Prq Q0UKD2   | mRNA tur    | 0     | 33.24  | 32 | 8  | 9  | 8  | 239  | 27.5  | 8.29  | 15.13 | 8  | cell organ; cytoplasm; protein bi     | P00466, 51154        | ENSG000001 MIRT04    | 0                 |           |             |             |                       | 0           | 0.796       | 0.048944268 | 12.7        | 1303.3  | 1695.4  | 6.45   | 8.35  | High  | High | High | High | High | High | 1    |   |
| FALSE | High   | Master Prq Q0547    | sphingolin  | 0     | 17.918 | 8  | 3  | 4  | 3  | 568  | 63.5  | 9.16  | 11.07 | 3  | cell death; endoplasm                 | catalytic a          | P00155, F 8879       | ENSG000001 SGP1   | 10        |             | Metabolic   | Kennedy p             | Sphingolip  | 8           | 0.796       | 0.620489259 | 8.18    | 446.8   | 564.2  | 75.1  | 17.79 | High | High | High | High | High | High | 1 |
| FALSE | High   | Master Prq Q02688   | Acidic leuc | 0     | 46.746 | 29 | 7  | 19 | 6  | 251  | 28.8  | 4.06  | 36.39 | 7  | cell organ; cytoplasm; protein bi     | P12179, F 10541      | ENSG000001 ANP32B    | 9                 |           |             |             |                       | 0           | 0.795       | 0.150155283 | 2.19        | 4240.9  | 4765.5  | 9.49   | 8.04  | High  | High | High | High | High | High | 1    |   |
| FALSE | High   | Master Prq Q093C6   | Peptidyl-p  | 0     | 7.758  | 17 | 2  | 2  | 2  | 166  | 18.2  | 7.99  | 6.63  | 2  | metabolic; spliceosom                 | catalytic a          | P00160, 51645        | ENSG000001 PPL1   | 6         |             | Spliceosom  | mRNA Spli             |             | 5           | 0.794       | 0.105854    | 14.43   | 304.4   | 474.3  | 17.51 | 20.19 | High | High | High | High | High | High | 1 |
| FALSE | High   | Master Prq Q15800   | Methylste   | 0     | 5.535  | 5  | 1  | 1  | 1  | 293  | 35.2  | 7.23  | 4.21  | 1  | metabolic; endoplasm                  | catalytic a          | P04116, 6307         | ENSG000001 MSMD1  | 4         |             | Metabolic   | Cholesterol           | Cholesterol | 7           | 0.794       | 0.167143133 | 8.48    | 60.7    | 72     | 13.22 | 3.88  | High | High | High | High | High | High | 1 |
| FALSE | High   | Master Prq Q13098   | COP9 sign   | 0     | 12.091 | 7  | 3  | 4  | 3  | 491  | 55.5  | 6.74  | 8.42  | 3  | cell organ; cytoplasm; enzyme re      | P01399, F 2873       | ENSG000001 GPS1      | 17                |           |             | Cargo reco  |                       | 13          | 0.793       | 0.013363064 | 2.51        | 552.5   | 696.7   | 5.97   | 8.7   | High  | High | High | High | High | High | 1    |   |
| FALSE | High   | Master Prq Q68036   | Ubiquitin   | 0     | 34.572 | 46 | 5  | 8  | 5  | 154  | 17.9  | 8.51  | 25.38 | 5  | cell profile; cytoplasm; catalytic a  | P00179, 7332         | ENSG000001 UBE2L3    | 22                |           | Ubiquitin r | Parkin-Ubi  | Synthesis c           | 13          | 0.793       | 0.017584515 | 0.04        | 2503.9  | 3079.5  | 3.34   | 5.81  | High  | High | High | High | High | High | 1    |   |
| FALSE | High   | Master Prq Q18077   | 60S riboso  | 0     | 51.537 | 53 | 8  | 33 | 8  | 110  | 12.5  | 11.06 | 7.38  | 8  | cell organ; cytosol;me                | protein bi           | P01247, 6165         | ENSG000001 RPL35A | 3         |             | Ribosome    | Cytoplasm; Peptide ch | 34          | 0.793       | 0.023037188 | 4.49        | 12175.5 | 15029.5 | 1.63   | 5.63  | High  | High | High | High | High | High | 1    |   |
| FALSE | High   | Master Prq Q0UH09   | Ubiquitin-2 | 0     | 24.363 | 7  | 3  | 7  | 2  | 624  | 65.7  | 5.22  | 16.17 | 3  | metabolic; cytoplasm; protein bi      | P00240, F 29978      | ENSG000001 UBLN2     | X                 |           | Protein prc | Cargo reco  |                       | 5           | 0.793       | 0.114073387 | 16.17       | 861.1   | 970.7   | 15.45  | 18.92 | High  | High | High | High | High | High | 1    |   |
| FALSE | High   | Master Prq P00491   | purine nuc  | 0     | 43.26  | 29 | 6  | 12 | 6  | 289  | 32.1  | 6.95  | 37.7  | 6  | metabolic; cytoplasm; catalytic a     | P01048, 4860         | ENSG000001 PNP       | 14                |           | Metabolic   | Neurotro    |                       | 13          | 0.792       | 0.113175413 | 19.3        | 2064.9  | 2605.6  | 12.01  | 5.87  | High  | High | High | High | High | High | 1    |   |
| FALSE | High   | Master Prq Q0XQ6-1  | nicotinate  | 0     | 24.155 | 13 | 5  | 5  | 5  | 538  | 57.5  | 5.68  | 11.55 | 5  | metabolic; cytoplasm; catalytic a     | P04095, 93100        | ENSG000001 NAPRT1; N | 8; CHR_ HS        | Metabolic | NAD- bio    | Neutrophil  |                       | 11          | 0.791       | 0.039399158 | 5.98        | 2325.7  | 2756.8  | 3.98   | 7.71  | High  | High | High | High | High | High | 1    |   |
| FALSE | Medium | Master Prq Q0H5X1-1 | MP18 farr   | 0.024 | 1.527  | 7  | 1  | 1  | 1  | 160  | 18.3  | 4.88  | 0     | 1  | cytoplasm; metal ion                  |                      | 84191                | ENSG000001 FAM96A | 6         |             |             |                       | 0           | 0.791       | 0.116201213 | 9.25        | 397.8   | 538.2   | 9.87   | 12.35 | High  | High | High | High | High | High | 1    |   |
| FALSE | High   | Master Prq Q09B6-1  | U3 small n  | 0     | 10.832 | 5  | 3  | 3  | 3  | 771  | 87.9  | 7.87  | 8.12  | 3  | metabolic; cytosol;nu                 | protein bi           | P04615, 10813        | ENSG000001 UTP14A | X         |             | Ribosome    | Major patf            |             | 6           | 0.79        | 0.024840803 | 11.23   | 358.7   | 498.2  | 13.17 | 10.34 | High | High | High | High | High | High | 1 |
| FALSE | High   | Master Prq Q09UC1-4 | Malignant   | 0     | 30.651 | 27 | 3  | 5  | 3  | 181  | 20.5  | 8.82  | 20.97 | 3  | cell organ; cytoplasm; protein bi     | P01472, 28985        | ENSG000001 QMUL1     | X                 |           |             |             |                       | 0           | 0.79        | 0.125430411 | 14.88       | 1185.9  | 1218    | 17.5   | 16.25 | High  | High | High | High | High | High | 1    |   |
| FALSE | High   | Master Prq P0306-1  | Guanine m   | 0     | 36.165 | 15 | 4  | 9  | 1  | 354  | 40.3  | 5.97  | 23.81 | 4  | cell division; cytoplasm; catalytic a | P00025, F 2770       | ENSG000001 GNA1      | 7                 |           | Morphine    | Nicotine A  | G alpha i             | 74          | 0.789       | 0.159387005 | 2.2         | 508.5   | 544.1   | 11.33  | 11.03 | High  | High | High | High | High | High | 1    |   |
| FALSE | High   | Master Prq Q09UB5   | Eukaryotic  | 0     | 39.626 | 40 | 7  | 9  | 7  | 218  | 25    | 4.93  | 21.03 | 7  | metabolic; cytoplasm; protein bi      | P01399, F 27335      | ENSG000001 EF3K      | 19; CHR_ H        | Formation |             |             |                       | 11          | 0.788       | 0.016983641 | 7.26        | 1419.4  | 1811.7  | 2.98   | 3.94  | High  | High | High | High | High | High | 1    |   |
| FALSE | High   | Master Prq Q09Y81-3 | Spermatog   | 0.002 | 3.595  | 3  | 1  | 1  | 1  | 493  | 57    | 7.4   | 2.31  | 1  | cell differ; cytoplasm; protein bi    | P09787, 63894        | ENSG000001 VPAS39    | 4                 |           |             |             |                       | 0           | 0.787       | 0.153429958 | 21.95       | 44.4    | 57.5    | 1.78   | 15.36 | High  | High | High | High | High | High | 1    |   |
| FALSE | High   | Master Prq Q16637   | Survival m  | 0     | 9.751  | 11 | 2  | 2  | 2  | 294  | 31.8  | 6.55  | 2.96  | 2  | cell organ; cytoplasm; protein bi     | P00603, 6606; 660    | ENSG000001 SMN1; SM  | 5; CHR_ HS        | RNA trans | snRNP Ass   |             | 4                     | 0.786       | 0.059249447 | 1.51        | 377.9       | 438.6   | 8.32    | 11.87  | High  | High  | High | High | High | High | 1    |      |   |
| FALSE | High   | Master Prq Q06R06   | Sperm-ass   | 0     | 2.504  | 1  | 1  | 1  | 1  | 1193 | 134.3 | 5     | 2.06  | 1  | cell division; chromos                | protein bi           | 10615                | ENSG000001 SPG10  | 0         |             |             |                       | 0           | 0.785       | 0.176685818 | 24.55       | 95.3    | 127.4   | 14.11  | 12.59 | High  | High | High | High | High | High | 1    |   |
| FALSE | High   | Master Prq P13645   | Keratin, ty | 0     | 70.192 | 22 | 10 | 21 | 9  | 584  | 58.8  | 5.21  | 64.63 | 10 | cell death; cytoplasm; structural     | P00038, F 3858       | ENSG000001 KRT10     | 17                |           | Staphylococ |             |                       | 0           | 0.785       | 0.549479997 | 2.74        | 5049.7  | 5726.1  | 15.06  | 6.66  | High  | High | High | High | High | High | 1    |   |
| FALSE | High   | Master Prq Q08162   | Cap-specif  | 0     | 7.927  | 2  | 1  | 1  | 1  | 835  | 95.3  | 7.05  | 3.03  | 1  | metabolic; cytosol;nu                 | catalytic a          | P01585, F 23070      |                   |           |             |             |                       |             |             |             |             |         |         |        |       |       |      |      |      |      |      |      |   |

|       |      |                      |             |   |        |    |    |    |    |      |      |       |        |    |              |                        |                    |                    |            |              |          |            |            |       |       |             |             |       |         |         |       |       |      |      |      |      |      |      |      |      |   |
|-------|------|----------------------|-------------|---|--------|----|----|----|----|------|------|-------|--------|----|--------------|------------------------|--------------------|--------------------|------------|--------------|----------|------------|------------|-------|-------|-------------|-------------|-------|---------|---------|-------|-------|------|------|------|------|------|------|------|------|---|
| FALSE | High | Master Pcr P46781    | 40S riboso  | 0 | 56.222 | 53 | 15 | 36 | 15 | 394  | 22.6 | 10.65 | 59.62  | 15 | cell organ   | cytoplasm; protein     | rib P00163, F 6203 | ENSG000001         | RP59       | 19; CHR, H   | Ribosome | Cytoplasm  | Peptide ch | 39    | 0.724 |             | 0.000989031 | 2.43  | 13985.7 | 19309.8 | 6.57  | 3.25  | High | 1 |
| FALSE | High | Master Pcr Q13547    | histone de  | 0 | 20.195 | 13 | 4  | 5  | 3  | 482  | 55.1 | 5.48  | 8.62   | 4  | cell differ  | chromos                | catalytic a        | P008050            | 3065       |              |          |            |            | 95    | 0.724 |             | 0.072800163 | 90.46 | 18.6    | 25.8    | 41.89 | 31.87 | High | 1 |
| FALSE | High | Master Pcr Q81574-1  | YH1-asso    | 0 | 5.544  | 14 | 1  | 1  | 1  | 180  | 19.9 | 9.72  | 3.16   | 1  | metabolic    | cytoplasm; metal ion   | P100641            | 10138              |            |              |          |            | 6          | 0.719 |       | 0.025290875 | 2.2         | 185.4 | 257.7   | 9.88    | 14.33 | High  | High | High | High | High | High | High | High | 1    |   |
| FALSE | High | Master Pcr P30041    | Peroxired   | 0 | 132.57 | 64 | 16 | 59 | 16 | 224  | 25   | 6.38  | 129.79 | 16 | cellular ho  | cytoplasm; antioxidant | P005078, F 9588    | ENSG000001         | P006X      | 1            |          | Metabolic  | NR2F path  | 8     | 0.719 |             | 0.044470299 | 8.99  | 10976.2 | 15918.2 | 47.3  | 11.12 | High | 1 |
| FALSE | High | Master Pcr P75834    | 5S proteo   | 0 | 22.42  | 25 | 4  | 4  | 4  | 226  | 24.4 | 6.1   | 1.94   | 4  | cell death   | cytoplasm; protein     | P00023, F 5716     | ENSG000001         | PSM010     | X            |          | Proteasom  | Neutrophil | 150   | 0.718 |             | 0.009017521 | 1.46  | 2467.3  | 3435.6  | 18.4  | 9.13  | High | 1 |
| FALSE | High | Master Pcr Q14950    | Myosin reg  | 0 | 21.905 | 40 | 5  | 7  | 5  | 172  | 19.8 | 4.84  | 1.66   | 5  | regulation   | cytosol                | metal ion          | P100396, F 103910; | ENSG000001 | MYL12B, N 18 |          | Regulation | Human TH   | 22    | 0.718 |             | 0.036024574 | 7.50  | 243.5   | 3252.5  | 7.09  | 13.31 | High | 1 |
| FALSE | High | Master Pcr P15941    | myosin I (C | 0 | 5.785  | 2  | 2  | 2  | 2  | 1255 | 12.2 | 7.47  | 2.12   | 2  | metabolic    | cytoplasm; DNA bindi   | P00030, F 4582     | ENSG000001         | MUC1       | 1            |          |            | 18         | 0.718 |       | 0.069193485 | 12.03       | 257.9 | 408.3   | 9.27    | 19.73 | High  | High | High | High | High | High | High | High | 1    |   |
| FALSE | High | Master Pcr Q5210     | Protein Fak | 0 | 19.194 | 8  | 2  | 6  | 1  | 330  | 37.2 | 6.29  | 17.24  | 2  | regulation   | cytoplasm; catalytic a | P102329            | 283742             | ENSG000001 | FAM988       | 15       |            |            | 3     | 0.716 |             | 0.010828214 | 1.23  | 934.5   | 1295    | 12.29 | 13.86 | High | 1 |
| FALSE | High | Master Pcr Q36613    | LanC-like p | 0 | 6.043  | 7  | 2  | 3  | 3  | 399  | 45.3 | 7.75  | 6.05   | 3  | metabolic    | cytoplasm; metal ion   | P105147            | 10314              | ENSG000001 | LANCL2       | 1        |            |            | 0     | 0.713 |             | 0.005597657 | 4.46  | 720     | 979.8   | 16.04 | 7.87  | High | 1 |
| FALSE | High | Master Pcr Q436613   | Protein reg | 0 | 4.673  | 2  | 1  | 2  | 1  | 620  | 71.6 | 6.68  | 697    | 1  | cell divisio | cytoplasm; protein     | P03999             | 9055               | ENSG000001 | PRC1         | 15       |            |            | 4     | 0.711 |             | 0.177688788 | 37.02 | 115.2   | 178.2   | 16.62 | 20.84 | High | 1 |
| FALSE | High | Master Pcr P53007    | Tricarboxy  | 0 | 12.157 | 11 | 3  | 3  | 3  | 311  | 34   | 9.89  | 6.83   | 3  | metabolic    | membrane; transporte   | P001513            | 6576               | ENSG000001 | SLC25A1      | 22       |            |            | 7     | 0.707 |             | 0.068609315 | 1.14  | 596.5   | 805     | 4.03  | 9.57  | High | 1 |
| FALSE | High | Master Pcr P11908    | ribose-pho  | 0 | 46.448 | 25 | 7  | 14 | 1  | 318  | 34.7 | 6.61  | 36.57  | 7  | metabolic    | cytoplasm; catalytic a | P00156, F 5634     | ENSG000001         | PRPF2      | X            |          | Metabolic  | Nucleotide | 10    | 0.703 |             | 0.004590656 | 4.8   | 2581.7  | 3596.9  | 13.11 | 5.71  | High | 1 |
| FALSE | High | Master Pcr Q39132-P1 | Negative e  | 0 | 10     |    |    |    |    |      |      |       |        |    |              |                        |                    |                    |            |              |          |            |            |       |       |             |             |       |         |         |       |       |      |      |      |      |      |      |      |      |   |

Table S2. Gene Ontology (GO) information, including the biological process, cellular component and molecular function, of differentially expressed proteins (DEPs) with  $|\text{FC}| \geq 1.2$  identified in A549 cells exposed to ZQX-1 (0.5  $\mu\text{M}$ ) under irradiation at 420 nm for 20 min following 4.0 h of incubation at 37 °C in the dark. \* NA: not available.

| No. | Accession | Gene symbol | Protein name                                     | FC (LZ vs.DZ) | Biological Process                                                                                                                 | Cellular Component                         | Molecular Function                                                                                                                                            |
|-----|-----------|-------------|--------------------------------------------------|---------------|------------------------------------------------------------------------------------------------------------------------------------|--------------------------------------------|---------------------------------------------------------------------------------------------------------------------------------------------------------------|
| 1   | Q86X55    | CARM1       | Histone-arginine methyltransferase CARM1         | -1.49         | cell organization and biogenesis; metabolic process; regulation of biological process; response to stimulus                        | cytoplasm; cytosol; nucleus                | catalytic activity; DNA binding; protein binding                                                                                                              |
| 2   | O75815-1  | BCAR3       | Breast cancer anti-estrogen resistance protein 3 | -1.49         | regulation of biological process; response to stimulus                                                                             | N.A.*                                      | protein binding                                                                                                                                               |
| 3   | P51153    | RAB13       | Ras-related protein Rab-13                       | -1.47         | cell organization and biogenesis; metabolic process; regulation of biological process; response to stimulus;                       | cytosol; Golgi; endosome; membrane         | catalytic activity; nucleotide binding; protein binding                                                                                                       |
| 4   | P11908    | PRPS2       | ribose-phosphate pyrophosphokinase 2             | -1.42         | metabolic process                                                                                                                  | N.A.*                                      | catalytic activity; metal ion binding; nucleotide binding; protein binding; metal ion binding; protein binding; receptor activity; signal transducer activity |
| 5   | O43813    | LANCL1      | Lan C-like protein 1                             | -1.40         | regulation of biological process; response to stimulus                                                                             | cytoplasm; membrane                        | catalytic activity; protein binding; RNA binding                                                                                                              |
| 6   | Q52LJ0    | FAM98B      | Protein Fam 98b                                  | -1.40         | metabolic process; regulation of biological process                                                                                | cytoplasm; nucleus                         | protein binding                                                                                                                                               |
| 7   | O75832    | PSMD10      | 26S proteasome non-ATPase regulatory subunit 10  | -1.39         | cell death; cell organization and biogenesis; metabolic process; regulation of biological process; response to stimulus; transport | cytoplasm; cytoskeleton; cytosol; nucleus; | protein binding                                                                                                                                               |

|    |          |                   |                                      |       |                                                                                                                      |                                                                                                  |                                                                                                        |
|----|----------|-------------------|--------------------------------------|-------|----------------------------------------------------------------------------------------------------------------------|--------------------------------------------------------------------------------------------------|--------------------------------------------------------------------------------------------------------|
| 8  | O14950   | MYL12B;<br>MYL12A | Myosin regulatory light<br>chain 12B | -1.39 | regulation of biological process;<br>response to stimulus                                                            | proteasome<br><br>cytosol                                                                        | metal ion binding;<br>protein binding                                                                  |
| 9  | Q8IY57-1 | YAF2              | YY1-associated factor 2              | -1.39 | metabolic process;<br>regulation of biological process                                                               | cytosol; nucleus                                                                                 | metal ion binding;<br>protein binding                                                                  |
| 10 | P30041   | PRDX6             | Peroxiredoxin-6                      | -1.39 | cellular homeostasis; metabolic<br>process; regulation of biological<br>process; response to stimulus;<br>transport  | cytoplasm;<br>cytosol;<br>extracellular;<br>membrane;<br>nucleus;<br>organelle<br>lumen; vacuole | antioxidant activity;<br>catalytic activity;<br>protein binding                                        |
| 11 | P46781   | RPS9              | 40S ribosomal protein S9             | -1.38 | cell organization and biogenesis;<br>metabolic process; regulation of<br>biological process; transport               | cytoplasm;<br>cytosol;<br>membrane;<br>nucleus;<br>ribosome                                      | protein binding; RNA<br>binding; structural<br>molecule activity;<br>translation regulator<br>activity |
| 12 | P68104   | EEF1A1            | Elongation factor 1-alpha<br>1       | -1.34 | metabolic process; regulation of<br>biological process; response to<br>stimulus; transport                           | cytoplasm;<br>cytosol;<br>membrane;<br>nucleus;<br>organelle lumen                               | catalytic activity;<br>nucleotide binding; protein<br>binding; RNA binding                             |
| 13 | P62877   | RBX1              | E3 ubiquitin-protein<br>ligase RBX1  | -1.33 | cell organization and biogenesis;<br>metabolic process;<br>regulation of biological process;<br>response to stimulus | cytoplasm;<br>cytosol; nucleus                                                                   | catalytic activity;<br>metal ion binding;<br>protein binding                                           |

|    |        |        |                                                     |       |                                                                                                                                                                               |                                                                          |                                                                                             |
|----|--------|--------|-----------------------------------------------------|-------|-------------------------------------------------------------------------------------------------------------------------------------------------------------------------------|--------------------------------------------------------------------------|---------------------------------------------------------------------------------------------|
| 14 | Q12933 | TRAF2  | TNF receptor-associated factor 2                    | -1.32 | cell death;<br>cell organization and biogenesis;<br>metabolic process;<br>response to stimulus                                                                                | cytoplasm;<br>cytosol;<br>membrane                                       | catalytic activity;<br>metal ion binding;<br>protein binding;<br>signal transducer activity |
| 15 | Q9UQ80 | PA2G4  | proliferation-associated protein 2G4                | -1.32 | cell proliferation; metabolic process;<br>regulation of biological process;<br>transport                                                                                      | cytoplasm;<br>extracellular;<br>membrane;<br>nucleus;<br>organelle lumen | DNA binding;<br>protein binding;<br>RNA binding                                             |
| 16 | Q6PI48 | DARS2  | Aspartate-tRNA ligase, mitochondrial                | -1.32 | metabolic process                                                                                                                                                             | cytoplasm;<br>mitochondrion;<br>nucleus;<br>organelle lumen              | catalytic activity;<br>nucleotide binding;<br>protein binding;<br>RNA binding               |
| 17 | Q9H074 | PAIP1  | Polyadenylate-binding protein-interacting protein 1 | -1.29 | metabolic process;<br>regulation of biological process                                                                                                                        | cytoplasm;<br>cytosol                                                    | protein binding;<br>RNA binding;<br>translation regulator activity                          |
| 18 | Q06124 | PTPN11 | tyrosine-protein phosphatase non-receptor type 11   | -1.29 | cell differentiation;<br>cell organization and biogenesis;<br>cellular component movement;<br>metabolic process;<br>regulation of biological process;<br>response to stimulus | cytoplasm;<br>cytosol;<br>mitochondrion;<br>nucleus                      | catalytic activity;<br>protein binding                                                      |
| 19 | Q9HCD5 | NCOA5  | Nuclear receptor coactivator 5                      | -1.28 | metabolic process;<br>regulation of biological process                                                                                                                        | cytoskeleton;<br>nucleus                                                 | protein binding;<br>RNA binding                                                             |

|    |          |                  |                                                         |       |                                                                                                                      |                                                             |                                                                                                             |
|----|----------|------------------|---------------------------------------------------------|-------|----------------------------------------------------------------------------------------------------------------------|-------------------------------------------------------------|-------------------------------------------------------------------------------------------------------------|
| 20 | Q9UBQ5   | EIF3K            | Eukaryotic translation initiation factor 3 subunit K    | -1.27 | metabolic process;<br>regulation of biological process                                                               | cytoplasm;<br>cytosol;<br>membrane;<br>nucleus              | protein binding;<br>RNA binding                                                                             |
| 21 | Q6XQN6-1 | NAPRT1;<br>NAPRT | nicotinate phosphoribosyl transferase                   | -1.26 | metabolic process;<br>response to stimulus; transport                                                                | cytoplasm;<br>cytosol;<br>extracellular;<br>organelle lumen | catalytic activity;<br>protein binding                                                                      |
| 22 | Q13098   | GPS1             | COP9 signalosome complex subunit 1                      | -1.26 | cell organization and biogenesis;<br>metabolic process;<br>regulation of biological process;<br>response to stimulus | cytoplasm;<br>cytosol;<br>nucleus                           | enzyme regulator activity;<br>protein binding                                                               |
| 23 | P68036   | UBE2L3           | Ubiquitin-conjugating enzyme E2 L3                      | -1.26 | cell proliferation;<br>metabolic process;<br>regulation of biological process;<br>response to stimulus               | cytoplasm;<br>cytosol;<br>nucleus                           | catalytic activity;<br>enzyme regulator activity;<br>nucleotide binding;<br>protein binding;<br>RNA binding |
| 24 | P18077   | RPL35A           | 60S ribosomal protein L35a                              | -1.26 | cell organization and biogenesis;<br>metabolic process;<br>transport                                                 | cytosol;<br>membrane;<br>ribosome                           | protein binding;<br>RNA binding;<br>structural molecule activity                                            |
| 25 | Q9BQC3   | DPH2             | 2-(3-amino-3-carboxypropyl)histidine synthase subunit 2 | -1.26 | metabolic process                                                                                                    | cytosol                                                     | catalytic activity;<br>protein binding                                                                      |
| 26 | Q9UKD2   | MRTO4            | mRNA turnover protein 4 homolog                         | -1.26 | cell organization and biogenesis;<br>metabolic process                                                               | cytoplasm;<br>nucleus                                       | protein binding;<br>RNA binding                                                                             |

|    |          |                  |                                                                            |       |                                                                                                                                   |                                                                    |                                                                |
|----|----------|------------------|----------------------------------------------------------------------------|-------|-----------------------------------------------------------------------------------------------------------------------------------|--------------------------------------------------------------------|----------------------------------------------------------------|
| 27 | Q9NWT1   | PAK1IP1          | p21-activated protein kinase-interacting protein 1                         | -1.25 | cell proliferation;<br>regulation of biological process                                                                           | nucleus                                                            | protein binding                                                |
| 28 | P59998   | ARPC4            | Actin-related protein 2/3 complex subunit 4                                | -1.24 | cell organization and biogenesis;<br>regulation of biological process;<br>response to stimulus                                    | cytoplasm;<br>cytoskeleton;<br>cytosol                             | protein binding;<br>structural molecule activity               |
| 29 | Q16342-1 | PDCD2            | Programmed cell death protein 2                                            | -1.24 | cell death;<br>metabolic process;<br>regulation of biological process                                                             | cytoplasm;<br>nucleus                                              | DNA binding;<br>metal ion binding;<br>protein binding          |
| 30 | Q8WX92   | COBRA1;<br>NELFB | Negative elongation factor B                                               | -1.23 | metabolic process;<br>regulation of biological process                                                                            | cytoplasm;<br>nucleus                                              | protein binding;<br>RNA binding                                |
| 31 | Q86TI2   | DPP9             | Dipeptidyl peptidase 9                                                     | -1.23 | metabolic process                                                                                                                 | cytoplasm;<br>cytosol;<br>nucleus                                  | catalytic activity;<br>protein binding                         |
| 32 | P63244   | GNB2L1;<br>RACK1 | Receptor of activated protein C kinase 1                                   | -1.23 | cell death; cellular homeostasis;<br>development; metabolic process;<br>regulation of biological process;<br>response to stimulus | cytoplasm;<br>mitochondrion;<br>nucleus;<br>ribosome               | enzyme regulator activity;<br>protein binding;<br>RNA binding; |
| 33 | Q92538   | GBF1             | Golgi-specific brefeldin A-resistance guanine nucleotide exchange factor 1 | -1.23 | cell organization and biogenesis;<br>cellular component movement;<br>metabolic process;<br>response to stimulus; transport        | cytoplasm;<br>cytosol; Golgi;<br>mitochondrion;<br>organelle lumen | protein binding                                                |
| 34 | P40261   | NNMT             | Nicotinamide N-methyl transferase                                          | -1.22 | metabolic process;<br>response to stimulus                                                                                        | cytoplasm;<br>cytosol                                              | catalytic activity                                             |



| 35  | Q9Y508-1  | RNF114         | E3 ubiquitin-protein<br>ligase RNF114                             | -1.22             | cell differentiation;<br>development;<br>metabolic process;<br>regulation of biological process                                                               | cytoplasm;<br>cytosol;<br>membrane;<br>nucleus                      | catalytic activity;<br>metal ion binding;<br>protein binding            |
|-----|-----------|----------------|-------------------------------------------------------------------|-------------------|---------------------------------------------------------------------------------------------------------------------------------------------------------------|---------------------------------------------------------------------|-------------------------------------------------------------------------|
| 36  | P23396-1  | RPS3           | 40S ribosomal protein S3                                          | -1.22             | cell death; cell division;<br>cell organization and biogenesis;<br>metabolic process;<br>regulation of biological process;<br>response to stimulus; transport | endoplasmic<br>reticulum;<br>mitochondrion;<br>nucleus;<br>ribosome | catalytic activity;<br>DNA binding;<br>protein binding;<br>RNA binding; |
| 37  | Q7L1Q6-1  | BZW1           | Basic leucine zipper and<br>W2 domain-containing<br>protein 1     | -1.22             | metabolic process;<br>regulation of biological process                                                                                                        | cytoplasm;<br>membrane                                              | protein binding;<br>RNA binding                                         |
| 38  | O60256-1  | PRPSAP2        | Phosphoribosyl<br>pyrophosphate synthase-<br>associated protein 2 | -1.22             | metabolic process;<br>regulation of biological process                                                                                                        | N.A.*                                                               | catalytic activity;<br>metal ion binding;<br>protein binding            |
| 39  | P26374    | CHML           | Rab proteins geranyl<br>transferase component A<br>2              | -1.21             | metabolic process;<br>regulation of biological process;<br>response to stimulus; transport                                                                    | cytoplasm;<br>cytosol                                               | catalytic activity;<br>protein binding                                  |
| 40  | P62910    | RPL32          | 60S ribosomal protein<br>L32                                      | -1.20             | cell organization and biogenesis;<br>metabolic process;<br>response to stimulus; transport                                                                    | cytosol;<br>membrane;<br>ribosome                                   | RNA binding;<br>structural molecule activity                            |
| 41  | P00338-1  | LDHA           | L-lactate dehydrogenase<br>A chain                                | -1.20             | metabolic process; regulation of<br>biological process                                                                                                        | cytoplasm;<br>nucleus                                               | protein binding; RNA<br>binding                                         |
| No. | Accession | Gene<br>symbol | Protein name                                                      | FC<br>(LZ vs. DZ) | Biological Process                                                                                                                                            | Cellular<br>Component                                               | Molecular Function                                                      |

|   |          |          |                                                     |      |                                                                                                             |                                          |                                                         |
|---|----------|----------|-----------------------------------------------------|------|-------------------------------------------------------------------------------------------------------------|------------------------------------------|---------------------------------------------------------|
| 1 | P56385   | ATP5ME   | ATP synthase subunit e, mitochondrial               | 1.20 | cell organization and biogenesis; metabolic process; transport                                              | membrane; mitochondrion                  | catalytic activity; transporter activity                |
| 2 | P63165-1 | SUMO1    | Small ubiquitin-related modifier 1                  | 1.20 | cell organization and biogenesis; metabolic process; regulation of biological process; response to stimulus | chromosome; cytoplasm; membrane; nucleus | catalytic activity; protein binding; RNA binding        |
| 3 | Q5JTV8   | TOR1AIP1 | Torsin-1A-interacting protein 1                     | 1.21 | cell organization and biogenesis; regulation of biological process                                          | membrane; nucleus                        | enzyme regulator activity; protein binding              |
| 4 | Q9GZP4   | PITHD1   | PITH domain-containing protein 1                    | 1.21 | response to stimulus                                                                                        | nucleus                                  |                                                         |
| 5 | Q92734-1 | TFG      | Protein TFG                                         | 1.22 | cell organization and biogenesis; regulation of biological process; response to stimulus; transport         | cytoplasm; endoplasmic reticulum;        | protein binding; signal transducer activity             |
| 6 | Q96EC8-1 | YIPF6    | Protein YIPF6                                       | 1.22 | N.A.*                                                                                                       | endoplasmic reticulum; Golgi;            | protein binding                                         |
| 7 | P14406   | COX7A2   | Cytochrome c oxidase subunit 7A2, mitochondrial     | 1.22 | metabolic process; transport                                                                                | membrane; mitochondrion                  | catalytic activity; transporter activity                |
| 8 | O96008   | TOMM40   | Mitochondrial import receptor subunit TOM40 homolog | 1.23 | cell communication; metabolic process; response to stimulus; transport                                      | cytosol; membrane; mitochondrion         | protein binding; transporter activity                   |
| 9 | P19367-1 | HK1      | Hexokinase-1                                        | 1.23 | cellular homeostasis; metabolic process; regulation of biological process                                   | cytosol; membrane; mitochondrion         | catalytic activity; nucleotide binding; protein binding |

|    |          |        |                                                          |      |                                                                                                                       |                                                    |                                                               |
|----|----------|--------|----------------------------------------------------------|------|-----------------------------------------------------------------------------------------------------------------------|----------------------------------------------------|---------------------------------------------------------------|
| 10 | Q9Y3D9   | MRPS23 | 28S ribosomal protein S23, mitochondrial                 | 1.23 | cell organization and biogenesis;<br>metabolic process                                                                | cytoskeleton;<br>mitochondrion;<br>ribosome        | protein binding;<br>RNA binding;                              |
| 11 | O75175   | CNOT3  | CCR4-NOT transcription complex subunit 3                 | 1.23 | cell differentiation; development;<br>metabolic process;<br>regulation of biological process;<br>response to stimulus | cytoplasm;<br>cytosol;<br>nucleus                  | protein binding                                               |
| 12 | Q9UIJ7-1 | AK3    | GTP: AMP<br>phosphotransferase AK3,<br>mitochondrial     | 1.23 | coagulation;<br>metabolic process                                                                                     | mitochondrion;<br>organelle lumen                  | catalytic activity;<br>nucleotide binding;<br>protein binding |
| 13 | Q6P1L8   | MRPL14 | 39S ribosomal protein L14, mitochondrial                 | 1.23 | cell organization and biogenesis;<br>metabolic process                                                                | membrane;<br>mitochondrion;<br>ribosome            | RNA binding;<br>structural molecule activity                  |
| 14 | P80303   | NUCB2  | Nucleobindin-2                                           | 1.24 | N.A.*                                                                                                                 | endoplasmic<br>reticulum;<br>nucleus               | DNA binding;<br>metal ion binding;<br>protein binding         |
| 15 | Q9H089   | LSG1   | Large subunit GTPase 1 homolog                           | 1.24 | transport                                                                                                             | cytoplasm;<br>endoplasmic<br>reticulum;<br>nucleus | catalytic activity;<br>nucleotide binding                     |
| 16 | Q9HDC9   | APMAP  | Adipocyte plasma<br>membrane-associated<br>protein       | 1.24 | metabolic process                                                                                                     | cell surface;<br>endoplasmic<br>reticulum;         | catalytic activity                                            |
| 17 | Q9BXT2   | CACNG6 | voltage-dependent<br>calcium channel gamma-<br>6 subunit | 1.25 | regulation of biological process;<br>transport                                                                        | membrane                                           | transporter activity                                          |

|    |          |         |                                                                  |      |                                                                                                                            |                                                          |                                                                                                               |
|----|----------|---------|------------------------------------------------------------------|------|----------------------------------------------------------------------------------------------------------------------------|----------------------------------------------------------|---------------------------------------------------------------------------------------------------------------|
| 18 | Q9BS26   | ERP44   | Endoplasmic reticulum resident protein 44                        | 1.26 | cellular homeostasis;<br>metabolic process;<br>regulation of biological process;<br>response to stimulus; transport        | endoplasmic reticulum;<br>organelle lumen                | catalytic activity;<br>metal ion binding;<br>protein binding                                                  |
| 19 | P09651-2 | HNRNPA1 | Isoform A1-A of<br>Heterogeneous nuclear<br>ribonucleoprotein A1 | 1.27 | cell communication;<br>metabolic process;<br>regulation of biological process;<br>response to stimulus; transport          | cytoplasm;<br>nucleus;<br>spliceosomal<br>complex        | DNA binding;<br>protein binding;<br>RNA binding                                                               |
| 20 | P09874   | PARP1   | Poly [ADP-ribose]<br>polymerase 1                                | 1.27 | cell death; cell differentiation;<br>metabolic process; regulation of<br>biological process;<br>response to stimulus       | membrane;<br>mitochondrion;<br>nucleus                   | catalytic activity; DNA<br>binding; metal ion binding;<br>nucleotide binding; protein<br>binding; RNA binding |
| 21 | Q9UBS4   | DNAJB11 | DNAJ homolog<br>subfamily B member 11                            | 1.27 | metabolic process;<br>regulation of biological process                                                                     | endoplasmic<br>reticulum;<br>nucleus;<br>organelle lumen | protein binding                                                                                               |
| 22 | P01111   | NRAS    | GTPase NRas                                                      | 1.27 | cellular component movement;<br>metabolic process;<br>regulation of biological process;<br>response to stimulus; transport | Golgi;<br>membrane                                       | catalytic activity;<br>nucleotide binding;<br>protein binding                                                 |
| 23 | Q8TDW7   | FAT3    | Protocadherin Fat 3                                              | 1.27 | development                                                                                                                | membrane                                                 | metal ion binding;<br>protein binding                                                                         |

|    |          |                   |                                                           |      |                                                                      |                                                         |                                                                 |
|----|----------|-------------------|-----------------------------------------------------------|------|----------------------------------------------------------------------|---------------------------------------------------------|-----------------------------------------------------------------|
| 24 | Q86VU5   | COMTD1            | Catechol O-methyl transferase domain-containing protein 1 | 1.28 | metabolic process                                                    | membrane;<br>mitochondrion                              | catalytic activity;<br>protein binding                          |
| 25 | P56377   | AP1S2             | AP-1 complex subunit sigma-2                              | 1.29 | regulation of biological process;<br>transport                       | cytosol;<br>Golgi;<br>membrane                          | protein binding;<br>transporter activity                        |
| 26 | Q8NEY8-3 | PPHLN1            | Isoform 3 of Periphilin-1                                 | 1.30 | metabolic process;<br>regulation of biological process               | chromosome;<br>cytosol;<br>Golgi                        | protein binding;<br>RNA binding                                 |
| 27 | Q8WWC4   | C2orf47;<br>MAIP1 | m-AAA protease-interacting protein 1, mitochondrial       | 1.30 | cell organization and biogenesis;<br>cellular homeostasis; transport | membrane;<br>mitochondrion;<br>organelle lumen          | protein binding                                                 |
| 28 | P07919   | UQCRH             | Cytochrome b-c1 complex subunit 6, mitochondrial          | 1.32 | metabolic process; transport                                         | membrane;<br>mitochondrion                              | catalytic activity;<br>protein binding;<br>transporter activity |
| 29 | Q9NX40   | OCIAD1            | OCIA domain-containing protein 1                          | 1.33 | regulation of biological process                                     | endosome;<br>membrane;<br>mitochondrion                 | protein binding                                                 |
| 30 | Q96AY3   | FKBP10            | Peptidyl-prolyl cis-trans isomerase FKBP10                | 1.35 | cell organization and biogenesis;<br>metabolic process               | cytoplasm;<br>endoplasmic reticulum;<br>organelle lumen | catalytic activity;<br>metal ion binding                        |
| 31 | Q9HD33-1 | MRPL47            | 39S ribosomal protein L47, mitochondrial                  | 1.38 | cell organization and biogenesis;<br>metabolic process               | membrane;<br>mitochondrion;<br>ribosome                 | structural molecule activity                                    |

|    |          |          |                                                               |      |                                                                                                                                          |                                                                              |                                                                                                            |
|----|----------|----------|---------------------------------------------------------------|------|------------------------------------------------------------------------------------------------------------------------------------------|------------------------------------------------------------------------------|------------------------------------------------------------------------------------------------------------|
| 32 | P50213-1 | IDH3A    | Isocitrate dehydrogenase<br>8 subunit alpha,<br>mitochondrial | 1.41 | metabolic process                                                                                                                        | mitochondrion;<br>nucleus;<br>organelle lumen                                | catalytic activity;<br>metal ion binding;<br>nucleotide binding                                            |
| 33 | Q8NHP8   | PLBD2    | Putative phospholipase<br>B-like 2                            | 1.41 | metabolic process                                                                                                                        | organelle<br>lumen; vacuole                                                  | catalytic activity                                                                                         |
| 34 | P14314   | PRKCSH   | Glucosidase 2 subunit<br>beta                                 | 1.43 | metabolic process;<br>regulation of biological process;<br>response to stimulus                                                          | endoplasmic<br>reticulum;<br>organelle lumen                                 | metal ion binding; protein<br>binding                                                                      |
| 35 | P02788   | LTF      | Lactotransferrin                                              | 1.45 | cellular homeostasis;<br>defense response;<br>metabolic process;<br>regulation of biological process;<br>response to stimulus; transport | cell surface;<br>cytoplasm;<br>extracellular;<br>nucleus;<br>organelle lumen | catalytic activity;<br>DNA binding;<br>enzyme regulator activity;<br>metal ion binding;<br>protein binding |
| 36 | Q9HCN8   | SDF2L1   | Stromal cell-derived<br>factor 2-like protein 1               | 1.49 | metabolic process;<br>regulation of biological process;<br>response to stimulus                                                          | endoplasmic<br>reticulum;<br>membrane;<br>organelle lumen                    | catalytic activity;<br>protein binding                                                                     |
| 37 | P16403   | HIST1H1C | Histone H1.2                                                  | 1.58 | cell organization and biogenesis;<br>metabolic process;<br>regulation of biological process                                              | chromosome;<br>nucleus                                                       | DNA binding;<br>protein binding;<br>RNA binding                                                            |
| 38 | Q96A26   | FAM162A  | Protein FAM162A                                               | 1.66 | cell death; metabolic process;<br>regulation of biological process;<br>response to stimulus                                              | cytosol;<br>membrane;<br>mitochondrion                                       | protein binding                                                                                            |

|    |          |               |                                                                               |      |                                                                                                                                 |                                                            |                                                                                                                |
|----|----------|---------------|-------------------------------------------------------------------------------|------|---------------------------------------------------------------------------------------------------------------------------------|------------------------------------------------------------|----------------------------------------------------------------------------------------------------------------|
| 39 | P23142-4 | FBLN1         | Isoform C of Fibulin-1                                                        | 1.68 | cell organization and biogenesis;<br>metabolic process;<br>regulation of biological process;<br>response to stimulus            | extracellular                                              | enzyme regulator activity;<br>metal ion binding;<br>protein binding;<br>structural molecule activity           |
| 40 | P21912   | SDHB          | Succinate dehydrogenase<br>[ubiquinone] iron-sulfur<br>subunit, mitochondrial | 1.68 | metabolic process; transport                                                                                                    | membrane;<br>mitochondrion                                 | catalytic activity;<br>metal ion binding;<br>protein binding                                                   |
| 41 | P69905   | HBA2;<br>HBA1 | Hemoglobin subunit<br>alpha                                                   | 2.04 | cell organization and biogenesis;<br>metabolic process;<br>regulation of biological process;<br>response to stimulus; transport | cytosol;<br>extracellular;<br>membrane;<br>organelle lumen | antioxidant activity;<br>catalytic activity;<br>metal ion binding;<br>protein binding;<br>transporter activity |
| 42 | P02765   | AHSG          | Alpha-2-HS-glycoprotein                                                       | 2.51 | defense response;<br>metabolic process;<br>regulation of biological process;<br>response to stimulus; transport                 | extracellular;<br>organelle<br>lumen; Golgi;               | enzyme regulator activity                                                                                      |
| 43 | P78562   | PHEX          | Phosphate-regulating<br>neutral endopeptidase<br>PHEX                         | 3.70 | cell communication;<br>metabolic process;<br>response to stimulus                                                               | endoplasmic<br>reticulum;<br>Golgi;<br>membrane            | catalytic activity;<br>metal ion binding                                                                       |

---

Table S3. Bioinformatics information and KEGG/Wiki/Reactome pathways of DNA damage repair proteins and DNA damage response proteins with a fold change (FC)  $\leq -1.20$  or of  $\geq 1.20$  identified in A549 cells exposed to ZQX-1 (0.5  $\mu$ M) under irradiation at 420 nm. \* NA: not available.

| Accession | Gene Symbol | Protein name                       | FC (LZ vs. DZ) | KEGG pathways                                                                                                               | Wiki pathways                                                                          | Reactome pathways                                                                                                                                                                                                                                                                                                                                                                                                                                                                                                                               |
|-----------|-------------|------------------------------------|----------------|-----------------------------------------------------------------------------------------------------------------------------|----------------------------------------------------------------------------------------|-------------------------------------------------------------------------------------------------------------------------------------------------------------------------------------------------------------------------------------------------------------------------------------------------------------------------------------------------------------------------------------------------------------------------------------------------------------------------------------------------------------------------------------------------|
| P62877    | RBX1        | E3 ubiquitin-protein ligase        | -1.33          | nucleotide excision repair; HIF-1 signaling pathway; Ubiquitin mediated proteolysis; cell cycle; TGF-beta signaling pathway | TGF-beta signaling pathway;                                                            | DNA damage recognition in GG-NER; formation of incision complex in GG-NER; dual incision in GG-NER; formation of TC-NER pre-incision complex; Dual incision in TC-NER; Gap-filling DNA repair synthesis and ligation in TC-NER; recognition of DNA damage by PCNA-containing replication complex; NOTCH1 intracellular domain regulates transcription; Oxygen-dependent proline hydroxylation of Hypoxia-inducible factor Alpha; constitutive signaling by NOTCH1 HD+PEST domain mutants; Ubiquitination & Proteasome degradation; Neddylation; |
| Q13098    | GPS1        | COP9 signalosome complex subunit 1 | -1.26          | NA*                                                                                                                         | NA*                                                                                    | DNA Damage Recognition in GG-NER; formation of TC-NER Pre-Incision Complex; Neddylation; Cargo recognition for clathrin-mediated endocytosis                                                                                                                                                                                                                                                                                                                                                                                                    |
| P63165-1  | SUMO1       | Small ubiquitin-related modifier 1 | 1.20           | RNA transport                                                                                                               | TP53 Network; TGF-beta Signaling Pathway;                                              | SUMOylation of DNA damage response and repair proteins; Recruitment and ATM-mediated phosphorylation of repair and signaling proteins at DNA double strand breaks; Processing of DNA double-strand break ends G2/M DNA damage checkpoint; SUMOylation of DNA replication proteins; Nonhomologous End-Joining (NHEJ); Formation of Incision Complex in GG-NER;                                                                                                                                                                                   |
| P01111    | NRAS        | GTPase NRas                        | 1.27           | Apoptosis; Non-small cell lung cancer; Ras signaling pathway; PI3K-Akt signaling pathway;                                   | DNA Damage Response (only ATM dependent);                                              | Regulation of RAS by GAPs; SHC-mediated cascade:FGFR1/3/4; Signaling by high-kinase activity BRAF mutants; VEGFR2 mediated cell proliferation; RAF activation; Negative regulation of MAPK pathway; CER1 mediated MAPK activation; Downstream signal transduction; RAS signaling downstream of NF1 loss-of-function variants; RAS GTPase and MAP kinases;                                                                                                                                                                                       |
| P09874    | PARP1       | Poly [ADP-ribose] polymerase 1     | 1.27           | Apoptosis; Base excision repair; NF-kappa B signaling pathway;                                                              | NAD metabolism; NAD+ biosynthetic pathways; Nanoparticle triggered regulated necrosis; | POLB-Dependent Long Patch Base Excision Repair; Dual Incision in GG-NER; Formation of Incision Complex in GG-NER; Downregulation of SMAD2/3:SMAD4 transcriptional activity; DNA Damage Recognition in GG-NER; HDR through MMEJ (alt-NHEJ); SUMOylation of DNA damage response and repair proteins                                                                                                                                                                                                                                               |



Table S4. Proteins associated with photodynamic therapy-induced signaling pathways.

| Accession       | Gene Symbol | Protein name                        | FC (LZ vs. DZ) | Biological process                                                              | Cellular component                                                  | Molecular function                                            | KEGG pathways                                                                                                                                                                                                      | Wiki pathways                                                                                                             |
|-----------------|-------------|-------------------------------------|----------------|---------------------------------------------------------------------------------|---------------------------------------------------------------------|---------------------------------------------------------------|--------------------------------------------------------------------------------------------------------------------------------------------------------------------------------------------------------------------|---------------------------------------------------------------------------------------------------------------------------|
| <b>P00338-1</b> | LDHA        | L-lactate dehydrogenase A chain     | -1.20          | metabolic process;<br>regulation of biological process                          | cytoplasm;<br>nucleus                                               | protein binding;<br>RNA binding                               | HIF-1 signaling pathway; metabolic pathways; pyruvate metabolism; glycolysis / gluconeogenesis; central carbon metabolism in cancer; cysteine and methionine metabolism; glucagon signaling pathway;               | photodynamic therapy-induced HIF-1 survival signaling; glycolysis and gluconeogenesis; Cori cycle; amino acid metabolism; |
| <b>P19367-1</b> | HK1         | Hexokinase-1                        | 1.23           | cellular homeostasis;<br>metabolic process;<br>regulation of biological process | cytosol;<br>membrane;<br>mitochondrion                              | catalytic activity;<br>nucleotide binding;<br>protein binding | HIF-1 signaling pathway; carbon metabolism; glycolysis / gluconeogenesis; fructose and mannose metabolism; galactose metabolism; amino sugar and nucleotide sugar metabolism; central carbon metabolism in cancer; | photodynamic therapy-induced HIF-1 survival signaling; Cori cycle; glycolysis and gluconeogenesis; glucuronidation        |
| <b>Q9UBS4</b>   | DNAJB11     | DNA J homolog subfamily B member 11 | 1.27           | metabolic process;<br>regulation of biological process                          | cytoplasm;<br>endoplasmic reticulum;<br>nucleus;<br>organelle lumen | protein binding                                               | protein processing in endoplasmic reticulum                                                                                                                                                                        | photodynamic therapy-induced unfolded protein response                                                                    |

**Table S5.** The enriched protein-protein (PPI) networks of the DEPs with  $|FC| \geq 1.2$  identified in A549 cells exposed to ZQX-1 under irradiation. The protein names in bold represent upregulation (↑) or downregulation (↓).

| No. | Molecules in the network                                                                                                                                                                                                                                                                           | Top associated diseases and functions of Network                                   |
|-----|----------------------------------------------------------------------------------------------------------------------------------------------------------------------------------------------------------------------------------------------------------------------------------------------------|------------------------------------------------------------------------------------|
| 1   | ACTN1, ADAM17, ARHGEF5, BCR, CXCL8, DDX10, DSG1, DSP, <b>EEF1A1</b> ↓, EGF, EGFR, <b>FKBP10</b> ↑, <b>GPS1</b> ↓, GRB2, HBB, HK2, HSPA8, HSPD1, IGF1R, JUP, MVP, NFKB1, NFKBIA, PKM, PRKCD, <b>PTPN11</b> ↓, RAD50, RELA, <b>RPS3</b> ↓, S100A9, <b>SDHB</b> ↑, SHC1, STK11, <b>TRAF2</b> ↓, UBA52 | Cell Death and Survival, Cellular Development, Organismal Injury and Abnormalities |
| 2   | TP53BP1, <b>UBE2L3</b> ↓                                                                                                                                                                                                                                                                           | Hereditary Disorder, Organismal Injury and Abnormalities                           |
| 3   | CDKN1A, <b>CNOT3</b> ↑                                                                                                                                                                                                                                                                             | Cell Morphology, Connective Tissue Development and Function                        |
| 4   | <b>AP1S2</b> ↑, SMARCA4                                                                                                                                                                                                                                                                            | Cancer, Cell Cycle                                                                 |
| 5   | <b>ATP5ME</b> ↑, SREBF1                                                                                                                                                                                                                                                                            | Dermatological Diseases and Conditions, Developmental Disorder                     |
| 6   | Let-7, <b>NRAS</b> ↑, RHOB                                                                                                                                                                                                                                                                         | Cancer, Hematological disease, immunological disease                               |
| 7   | BMI1, FOXM1, GLI1, <b>RACK1</b> ↓, SMO, PTCH1                                                                                                                                                                                                                                                      | Cancer, Organismal Injury and Abnormalities                                        |
